# Supplementary material
Source: PubMed Central journal article supplement (PMC3434494)
Supplement: MCB.00510-12_zmb999109544so1.pdf [file MCB.00510-12_zmb999109544so1.pdf]

| Gene Symbol          | miR-519 vs Ctrl siRNA<br>Protein Descriptions                                                                                                             | miR-519 vs Ctrl siRNA<br>Fold Change |
|----------------------|-----------------------------------------------------------------------------------------------------------------------------------------------------------|--------------------------------------|
| ALPPL2;ALPPL         | Alkaline phosphatase, placental-like                                                                                                                      | 12.22946598                          |
| CTH                  | Isoform 1 of Cystathionine gamma-lyase;cDNA FLJ50357, highly similar to Cystathionine gamma-lyase;Isoform 2 of Cystathionine gamma-lyase                  | 8.62953506                           |
| AGR2;AG2             | AGR2;Anterior gradient protein 2 homolog;Putative uncharacterized protein AGR2;Anterior gradient protein 3 homolog;Putative uncharacterized prot          | 8.147245743                          |
| SERPINB5;PI5         | Isoform 1 of Serpin B5;cDNA FLJ57640, highly similar to Serpin B5                                                                                         | 7.447885007                          |
| ITGA5;FNRA           | Integrin alpha-5;10 kDa protein                                                                                                                           | 6.928475998                          |
| ARID3A;DRIL1         | AT-rich interactive domain-containing protein 3A                                                                                                          | 6.491519324                          |
| LYPD3;C4.4A          | Ly6/PLAUR domain-containing protein 3;Putative uncharacterized protein DKFZp686D0114                                                                      | 5.80799834                           |
| ALPP;PLAP            | Alkaline phosphatase, placental type precursor                                                                                                            | 5.800280878                          |
| FDFT1;hCG_17749      | Squalene synthetase;cDNA FLJ50548, highly similar to Squalene synthetase;cDNA FLJ53107, highly similar to Squalene synthetase                             | 4.915823561                          |
| CDKN1B;p27 kip1      | Cyclin-dependent kinase inhibitor 1B;23 kDa protein;Putative uncharacterized protein CDKN1B                                                               | 4.581179079                          |
| LAMB3;LAMNB1         | Laminin subunit beta-3;cDNA FLJ61309, highly similar to Laminin beta-3 chain;18 kDa protein                                                               | 4.573390083                          |
| LAMB2;LAMS           | Laminin subunit beta-2;Similar to S-laminin                                                                                                               | 4.524186835                          |
| GSN                  | Isoform 1 of Gelsolin;gelsolin isoform c;Isoform 2 of Gelsolin;cDNA FLJ53327, highly similar to Gelsolin;>Q3SX14 TREMBL:Q3SX14 (Bos taurus) Si            | 4.395275195                          |
| LIFR                 | Leukemia inhibitory factor receptor                                                                                                                       | 4.306548385                          |
| SLC2A14;GLUT14       | cDNA FLJ56136, highly similar to Solute carrier family 2, facilitated glucosetransporter member 14;Isoform 1 of Solute carrier family 2, facilitated gluc | 4.092309491                          |
| HMOX1;HO;HO1         | Heme oxygenase 1;Heme oxygenase (Decycling) 1                                                                                                             | 4.082296684                          |
| LGALS3;MAC2          | Galectin-3                                                                                                                                                | 3.803771428                          |
| CLU;APOJ             | Isoform 2 of Clusterin;Isoform 1 of Clusterin;CLU                                                                                                         | 3.786732743                          |
| DDX60;DKFZp686E11248 | Probable ATP-dependent RNA helicase DDX60                                                                                                                 | 3.735303989                          |
| C1QTNF6;CTRP6        | Isoform 2 of Complement C1q tumor necrosis factor-related protein 6;Isoform 1 of Complement C1q tumor necrosis factor-related protein 6;Isoform 3         | 3.583704786                          |
| FSTL3;FLRG           | Follistatin-related protein 3                                                                                                                             | 3.497356656                          |
| ATP1B1;ATP1B         | Isoform 1 of Sodium/potassium-transporting ATPase subunit beta-1;Isoform 2 of Sodium/potassium-transporting ATPase subunit beta-1                         | 3.397289763                          |
| SLC38A2;ATA2         | Isoform 1 of Sodium-coupled neutral amino acid transporter 2;Isoform 2 of Sodium-coupled neutral amino acid transporter 2;24 kDa protein                  | 3.338684911                          |
| CDA;CDD              | Cytidine deaminase                                                                                                                                        | 3.273370956                          |
| AKR1B1;ALDR1         | Aldose reductase;Aldo-keto reductase family 1, member B1 variant                                                                                          | 3.254213823                          |
| ATP2B4;ATP2B2        | Isoform XD of Plasma membrane calcium-transporting ATPase 4;Isoform ZD of Plasma membrane calcium-transporting ATPase 4;Isoform XB of Pl                  | 3.253012306                          |
| OASL;TRIP14          | Isoform p56 of 59 kDa 2'-5'-oligoadenylate synthetase-like protein;Isoform p30 of 59 kDa 2'-5'-oligoadenylate synthetase-like protein                     | 3.212818658                          |
| F11R;JAM1            | cDNA FLJ54854, highly similar to Junctional adhesion molecule A;Junctional adhesion molecule A;30 kDa protein;Junction adhesion molecule;cDNA             | 3.142892333                          |
| FOLR1;FOLR           | Folate receptor alpha                                                                                                                                     | 3.11173313                           |
| S100A10;ANX2LG       | Protein S100-A10                                                                                                                                          | 3.050035324                          |
| TMEM106B             | Transmembrane protein 106B;Putative uncharacterized protein TMEM106B;Putative uncharacterized protein TMEM106B                                            | 2.988096487                          |
| SDCBP;MDA9           | Isoform 1 of Syntenin-1;Syntenin isoform 3;Isoform 3 of Syntenin-1;cDNA FLJ52996, highly similar to Syntenin-1                                            | 2.978048607                          |
| PLEC1                | Isoform 3 of Plectin-1;Isoform 2 of Plectin-1                                                                                                             | 2.921643911                          |
| P4HA2                | Isoform IIb of Prolyl 4-hydroxylase subunit alpha-2;Isoform IIa of Prolyl 4-hydroxylase subunit alpha-2                                                   | 2.890528222                          |
| CD276;B7H3           | 60 kDa protein;Isoform 1 of CD276 antigen;Isoform 4 of CD276 antigen;Isoform 3 of CD276 antigen;Isoform 2 of CD276 antigen                                | 2.87767893                           |
| JUP;CTNNG;DP3        | Junction plakoglobin                                                                                                                                      | 2.722176194                          |
| FDXR;ADXR            | cDNA FLJ53329, highly similar to NADPH:adrenodoxin oxidoreductase, mitochondrial;cDNA FLJ59457, highly similar to NADPH:adrenodoxin oxidor                | 2.636697419                          |
| ANXA11;ANX11         | cDNA FLJ55482, highly similar to Annexin A11;cDNA FLJ51518, highly similar to Annexin A11                                                                 | 2.567579604                          |
| SNAP23;hCG_40424     | Isoform SNAP-23a of Synaptosomal-associated protein 23;19 kDa protein;Isoform SNAP-23b of Synaptosomal-associated protein 23;14 kDa protein               | 2.502885247                          |
| GOLGA4               | Isoform 3 of Golgin subfamily A member 4;Isoform 1 of Golgin subfamily A member 4;Isoform 4 of Golgin subfamily A member 4;CTCL tumor antigen             | 2.39626247                           |
| SLFN5                | Isoform 1 of Schlafen family member 5;Isoform 2 of Schlafen family member 5                                                                               | 2.367534403                          |
| TTYH3;KIAA1691       | Isoform 1 of Protein tweety homolog 3;Isoform 2 of Protein tweety homolog 3;Isoform 3 of Protein tweety homolog 3;45 kDa protein;Putative unchara         | 2.364521768                          |
| LAMA5;KIAA0533       | Laminin subunit alpha-5;LAMA5 protein;Laminin, alpha 5                                                                                                    | 2.361834114                          |
| MOV10;KIAA1631       | Isoform 1 of Putative helicase MOV-10;Mov10, Moloney leukemia virus 10, homolog (Mouse), isoform CRA_a;Isoform 2 of Putative helicase MOV-10              | 2.339389588                          |
| ITGB5                | Integrin beta-5;Putative uncharacterized protein ITGB5                                                                                                    | 2.33124659                           |
| TIGAR;C12orf5        | Probable fructose-2,6-bisphosphatase TIGAR                                                                                                                | 2.2939311                            |

|                   |                                                                                                                                                      |                    |
|-------------------|------------------------------------------------------------------------------------------------------------------------------------------------------|--------------------|
| LXN               | Latexin                                                                                                                                              | <b>2.273107687</b> |
| PLOD2             | Isoform 2 of Procollagen-lysine,2-oxoglutarate 5-dioxygenase 2;Isoform 1 of Procollagen-lysine,2-oxoglutarate 5-dioxygenase 2;81 kDa protein         | <b>2.258921893</b> |
| CD59;MIC11;MIN1   | CD59 glycoprotein                                                                                                                                    | <b>2.254925693</b> |
| NDRG1;CAP43;DRG1  | Protein NDRG1;cDNA FLJ39243 fis, clone OCBBF2008283, highly similar to Protein NDRG1                                                                 | <b>2.236467919</b> |
| AKAP2;PRKA2       | Isoform 2 of A-kinase anchor protein 2;Isoform 4 of A-kinase anchor protein 2;Isoform 5 of A-kinase anchor protein 2;Isoform 3 of A-kinase anchor pi | <b>2.232391175</b> |
| CORO1B            | Coronin-1B                                                                                                                                           | <b>2.23229162</b>  |
| APOBEC3C;APOBEC1L | Similar to Apolipoprotein B mRNA editing enzyme, catalytic polypeptide-like 3C;Probable DNA dC->dU-editing enzyme APOBEC-3C                          | <b>2.204891833</b> |
| BASP1;NAP22       | Isoform 1 of Brain acid soluble protein 1;Isoform 2 of Brain acid soluble protein 1                                                                  | <b>2.201501144</b> |
| ANXA2;ANX2        | Isoform 2 of Annexin A2;Isoform 1 of Annexin A2;Putative annexin A2-like protein;24 kDa protein;cDNA FLJ59138, highly similar to Annexin A2;cDN.     | <b>2.192379303</b> |
| DSG2;CDHF5        | Desmoglein-2                                                                                                                                         | <b>2.187728693</b> |
| ATP2B1;PMCA1      | Isoform D of Plasma membrane calcium-transporting ATPase 1;Isoform C of Plasma membrane calcium-transporting ATPase 1;Isoform B of Plasma            | <b>2.182419596</b> |

1504 proteins show between 2.14-0.5 fold differences in abundance

**2.146537874**

|                     |                                                                                                                                                           |                    |
|---------------------|-----------------------------------------------------------------------------------------------------------------------------------------------------------|--------------------|
| SH3PXD2A;FISH       | Isoform 1 of SH3 and PX domain-containing protein 2A;SH3 multiple domains 1;cDNA FLJ58079, highly similar to Homo sapiens SH3 multiple doma               | <b>0.496806865</b> |
| THOP1               | Thimet oligopeptidase                                                                                                                                     | <b>0.487104732</b> |
| ACTL6A;BAF53;BAF53A | Isoform 1 of Actin-like protein 6A;Isoform 2 of Actin-like protein 6A                                                                                     | <b>0.478801814</b> |
| KPNA2;RCH1;SRP1     | Importin subunit alpha-2;Karyopherin alpha 2                                                                                                              | <b>0.476549682</b> |
| NCAPG;CAPG          | Condensin complex subunit 3                                                                                                                               | <b>0.476452665</b> |
| RIF1                | Putative uncharacterized protein RIF1;Isoform 1 of Telomere-associated protein RIF1;Isoform 2 of Telomere-associated protein RIF1;Putative uncha          | <b>0.475679879</b> |
| RRM1;RR1            | Ribonucleoside-diphosphate reductase large subunit;Ribonucleoside-diphosphate reductase                                                                   | <b>0.469254526</b> |
| MKI67               | Isoform Long of Antigen KI-67;Isoform Short of Antigen KI-67                                                                                              | <b>0.466346378</b> |
| DEK                 | Protein DEK;cDNA FLJ53031, highly similar to Protein DEK;DEK oncogene isoform 2                                                                           | <b>0.465818192</b> |
| NCAPD2;CAPD2        | Condensin complex subunit 1;cDNA FLJ43165 fis, clone FCBBF3002163, highly similar to Homo sapiens chromosome condensation-related SMC-a                   | <b>0.460829241</b> |
| MCM7;CDC47;MCM2     | Isoform 1 of DNA replication licensing factor MCM7;minichromosome maintenance complex component 7 isoform 2;Isoform 2 of DNA replication lice             | <b>0.454988464</b> |
| HPRT1;HPRT          | Putative uncharacterized protein HPRT1;Hypoxanthine-guanine phosphoribosyltransferase                                                                     | <b>0.45314423</b>  |
| MAT2A;AMS2          | S-adenosylmethionine synthetase isoform type-2;S-adenosylmethionine synthetase;Putative uncharacterized protein MAT2A                                     | <b>0.451432455</b> |
| LAP3;LAPEP;PEPS     | Isoform 1 of Cytosol aminopeptidase;Isoform 2 of Cytosol aminopeptidase;cDNA FLJ54122, highly similar to Cytosol aminopeptidase                           | <b>0.419000286</b> |
| TWF1;PTK9           | twinfilin 1;30 kDa protein;42 kDa protein;Isoform 3 of Twinfilin-1;Isoform 4 of Twinfilin-1                                                               | <b>0.40399835</b>  |
| HSPA4L              | Heat shock 70kDa protein 4-like, isoform CRA_b;Heat shock 70 kDa protein 4L                                                                               | <b>0.376398125</b> |
| RELA;NFKB3          | Isoform 1 of Transcription factor p65;Isoform 4 of Transcription factor p65;Isoform 3 of Transcription factor p65;Isoform 2 of Transcription factor p65;l | <b>0.370561522</b> |
| KIF23;KNSL5;MKLP1   | Putative uncharacterized protein KIF23 (Fragment);Isoform 1 of Kinesin-like protein KIF23;Isoform 2 of Kinesin-like protein KIF23                         | <b>0.362408742</b> |
| CMPK1;CMK           | UMP-CMP kinase 1 isoform a;UMP-CMP kinase 1 isoform b;cDNA FLJ53966, moderately similar to Homo sapiens cytidylate kinase (CMPK), mRNA                    | <b>0.357131384</b> |
| HCA90;TPX2          | TPX2, microtubule-associated, homolog (Xenopus laevis), isoform CRA_a;Targeting protein for Xklp2                                                         | <b>0.328209864</b> |
| DUT                 | Isoform 1 of Deoxyuridine 5'-triphosphate nucleotidohydrolase, mitochondrial;Isoform 3 of Deoxyuridine 5'-triphosphate nucleotidohydrolase, mitochc       | <b>0.325648874</b> |
| TOP2A;TOP2          | Isoform 4 of DNA topoisomerase 2-alpha;Putative uncharacterized protein TOP2A;Isoform 3 of DNA topoisomerase 2-alpha;Isoform 2 of DNA topois              | <b>0.316073529</b> |
| KIF2C;KNSL6         | Isoform 1 of Kinesin-like protein KIF2C;Isoform 2 of Kinesin-like protein KIF2C;Kinesin family member 2C;Kinesin family member 2C                         | <b>0.301177349</b> |
| RAB32               | Ras-related protein Rab-32                                                                                                                                | <b>0.242804635</b> |
| DCTPP1;XTP3TPA      | dCTP pyrophosphatase 1                                                                                                                                    | <b>0.203680381</b> |
