# Supplementary material
Source: PubMed Central journal article supplement (PMC3434494)
Supplement: MCB.00510-12_zmb999109544so2.pdf [file MCB.00510-12_zmb999109544so2.pdf]

| Symbol    | (Zratio)                 | (Fold)                   | ACCESSION      | Definition                                                                               |
|-----------|--------------------------|--------------------------|----------------|------------------------------------------------------------------------------------------|
|           | miR-519 vs<br>Ctrl siRNA | miR-519 vs<br>Ctrl siRNA |                |                                                                                          |
| LOC652233 | -8.96                    | -3.37                    | XM_941627.1    | PREDICTED: Homo sapiens hypothetical protein LOC652233 (LOC652233), mRNA.                |
| LOC652235 | -7.27                    | -2.8                     | XM_941629.1    | PREDICTED: Homo sapiens hypothetical protein LOC652235 (LOC652235), mRNA.                |
| PBK       | -7.18                    | -3                       | NM_018492.2    | Homo sapiens PDZ binding kinase (PBK), mRNA.                                             |
| CMPK1     | -7.08                    | -2.97                    | NM_016308.1    | Homo sapiens cytidine monophosphate (UMP-CMP) kinase 1, cytosolic (CMPK1), mRNA.         |
| IER3IP1   | -6.84                    | -2.78                    | NM_016097.3    | Homo sapiens immediate early response 3 interacting protein 1 (IER3IP1), mRNA.           |
| BIRC5     | -6.68                    | -2.72                    | NM_001168.2    | Homo sapiens baculoviral IAP repeat-containing 5 (survivin) (BIRC5), 1, mRNA.            |
| RAB32     | -6.63                    | -2.63                    | NM_006834.2    | Homo sapiens RAB32, member RAS oncogene family (RAB32), mRNA.                            |
| HES7      | -6.59                    | -2.54                    | NM_032580.1    | Homo sapiens hairy and enhancer of split 7 (Drosophila) (HES7), mRNA.                    |
| CENPE     | -6.33                    | -2.62                    | NM_001813.2    | Homo sapiens centromere protein E, 312kDa (CENPE), mRNA.                                 |
| CENPA     | -6.26                    | -2.52                    | NM_001042426.1 | Homo sapiens centromere protein A (CENPA), 2, mRNA.                                      |
| FAM81A    | -6.22                    | -2.59                    | NM_152450.2    | Homo sapiens family with sequence similarity 81, member A (FAM81A), mRNA.                |
| CMPK1     | -6.21                    | -2.51                    | NM_016308.1    | Homo sapiens cytidine monophosphate (UMP-CMP) kinase 1, cytosolic (CMPK1), mRNA.         |
| CBR3      | -6.21                    | -2.5                     | NM_001236.3    | Homo sapiens carbonyl reductase 3 (CBR3), mRNA.                                          |
| CDCA7L    | -6.2                     | -2.43                    | NM_018719.2    | Homo sapiens cell division cycle associated 7-like (CDCA7L), mRNA.                       |
| CDC45L    | -6.2                     | -2.58                    | NM_003504.3    | Homo sapiens CDC45 cell division cycle 45-like (S. cerevisiae) (CDC45L), mRNA.           |
| MTMR4     | -6.13                    | -2.35                    | NM_004687.3    | Homo sapiens myotubularin related protein 4 (MTMR4), mRNA.                               |
| EGR1      | -6.1                     | -2.44                    | NM_001964.2    | Homo sapiens early growth response 1 (EGR1), mRNA.                                       |
| DUT       | -6.1                     | -2.56                    | NM_001025249.1 | Homo sapiens deoxyuridine triphosphatase (DUT),                                          |
| MRRF      | -6.07                    | -2.43                    | NM_199177.1    | Homo sapiens mitochondrial ribosome recycling factor (MRRF)                              |
| CENPE     | -6.06                    | -2.49                    | NM_001813.2    | Homo sapiens centromere protein E, 312kDa (CENPE), mRNA.                                 |
| CCNB1     | -6.01                    | -2.5                     | NM_031966.2    | Homo sapiens cyclin B1 (CCNB1), mRNA.                                                    |
| CENPF     | -5.99                    | -2.52                    | NM_016343.3    | Homo sapiens centromere protein F, 350/400ka (mitosin) (CENPF), mRNA.                    |
| ADFP      | -5.98                    | -2.48                    | NM_001122.2    | Homo sapiens adipose differentiation-related protein (ADFP), mRNA.                       |
| GPD1L     | -5.81                    | -2.54                    | NM_015141.2    | Homo sapiens glycerol-3-phosphate dehydrogenase 1-like (GPD1L), mRNA.                    |
| TRIM7     | -5.81                    | -2.34                    | NM_033342.2    | Homo sapiens tripartite motif-containing 7 (TRIM7), 6, mRNA.                             |
| BRI3BP    | -5.8                     | -2.42                    | XM_941876.1    | PREDICTED: Homo sapiens BRI3 binding protein (BRI3BP), mRNA.                             |
| CDK2      | -5.79                    | -2.37                    | NM_001798.2    | Homo sapiens cyclin-dependent kinase 2 (CDK2), 1, mRNA.                                  |
| C12orf24  | -5.79                    | -2.4                     | NM_013300.1    | Homo sapiens chromosome 12 open reading frame 24 (C12orf24), mRNA.                       |
| CYBRD1    | -5.76                    | -2.32                    | NM_024843.2    | Homo sapiens cytochrome b reductase 1 (CYBRD1), mRNA.                                    |
| IL17RB    | -5.74                    | -2.37                    | NM_018725.3    | Homo sapiens interleukin 17 receptor B (IL17RB), mRNA.                                   |
| DUT       | -5.7                     | -2.4                     | NM_001025248.1 | Homo sapiens deoxyuridine triphosphatase (DUT),                                          |
| ATAD2     | -5.64                    | -2.45                    | NM_014109.2    | Homo sapiens ATPase family, AAA domain containing 2 (ATAD2), mRNA.                       |
| CYBRD1    | -5.6                     | -2.28                    | NM_024843.2    | Homo sapiens cytochrome b reductase 1 (CYBRD1), mRNA.                                    |
| MCM7      | -5.6                     | -2.34                    | NM_005916.3    | Homo sapiens minichromosome maintenance complex component 7 (MCM7), 1, mRNA.             |
| PRKAA1    | -5.55                    | -2.41                    | NM_206907.3    | Homo sapiens protein kinase, AMP-activated, alpha 1 catalytic subunit (PRKAA1), 2, mRNA. |
| FOXN4     | -5.52                    | -2.22                    | NM_213596.1    | Homo sapiens forkhead box N4 (FOXN4), mRNA.                                              |
| CBX6      | -5.43                    | -2.3                     | NM_014292.3    | Homo sapiens chromobox homolog 6 (CBX6), mRNA.                                           |
| MAT2B     | -5.4                     | -2.17                    | NM_182796.1    | Homo sapiens methionine adenosyltransferase II, beta (MAT2B), 2, mRNA.                   |
| DAZAP2    | -5.38                    | -2.38                    | NM_014764.2    | Homo sapiens DAZ associated protein 2 (DAZAP2), mRNA.                                    |
| CBFB      | -5.35                    | -2.29                    | NM_001755.2    | Homo sapiens core-binding factor, beta subunit (CBFB), 2, mRNA.                          |
| ADFP      | -5.33                    | -2.19                    | NM_001122.2    | Homo sapiens adipose differentiation-related protein (ADFP), mRNA.                       |
| BTN3A3    | -5.33                    | -2.08                    | NM_197974.1    | Homo sapiens butyrophilin, subfamily 3, member A3 (BTN3A3), 2, mRNA.                     |
| CEP55     | -5.31                    | -2.19                    | NM_018131.3    | Homo sapiens centrosomal protein 55kDa (CEP55), mRNA.                                    |
| C3orf60   | -5.3                     | -2.27                    | NM_199069.1    | Homo sapiens chromosome 3 open reading frame 60 (C3orf60), 1, mRNA.                      |
| KIF14     | -5.22                    | -2.24                    | NM_014875.1    | Homo sapiens kinesin family member 14 (KIF14), mRNA.                                     |

|          |       |       |                |                                                                                                  |
|----------|-------|-------|----------------|--------------------------------------------------------------------------------------------------|
| NETO2    | -5.21 | -2.28 | NM_018092.3    | Homo sapiens neuropilin (NRP) and tolloid (TLL)-like 2 (NETO2), mRNA.                            |
| MYB      | -5.19 | -2.1  | NM_005375.2    | Homo sapiens v-myb myeloblastosis viral oncogene homolog (avian) (MYB), mRNA.                    |
| MBNL1    | -5.18 | -2.29 | NM_207296.1    | Homo sapiens muscleblind-like (Drosophila) (MBNL1), 6, mRNA.                                     |
| AP1S2    | -5.18 | -2.22 | NM_003916.3    | Homo sapiens adaptor-related protein complex 1, sigma 2 subunit (AP1S2), mRNA.                   |
| JPH1     | -5.15 | -2.13 | NM_020647.2    | Homo sapiens junctophilin 1 (JPH1), mRNA.                                                        |
| PRKAA1   | -5.14 | -2.21 | NM_006251.5    | Homo sapiens protein kinase, AMP-activated, alpha 1 catalytic subunit (PRKAA1), 1, mRNA.         |
| KIF11    | -5.14 | -2.29 | NM_004523.2    | Homo sapiens kinesin family member 11 (KIF11), mRNA.                                             |
| MCM7     | -5.13 | -2.24 | NM_182776.1    | Homo sapiens minichromosome maintenance complex component 7 (MCM7), 2, mRNA.                     |
| ACTL6A   | -5.12 | -2.27 | NM_177989.2    | Homo sapiens actin-like 6A (ACTL6A), 2, mRNA.                                                    |
| GPSM2    | -5.09 | -2.25 | NM_013296.3    | Homo sapiens G-protein signalling modulator 2 (AGS3-like, C. elegans) (GPSM2), mRNA.             |
|          | -5.06 | -2.14 | AK095472       | Homo sapiens cDNA FLJ38153 fis, clone DFNES1000083                                               |
|          | -5.05 | -2.22 | AK022936       | Homo sapiens cDNA FLJ12874 fis, clone NT2RP2003769                                               |
| TOP2A    | -5.04 | -2.28 | NM_001067.2    | Homo sapiens topoisomerase (DNA) II alpha 170kDa (TOP2A), mRNA.                                  |
| ASPM     | -5.03 | -2.29 | NM_018136.3    | Homo sapiens asp (abnormal spindle) homolog, microcephaly associated (Drosophila) (ASPM), mRNA.  |
| KIAA1715 | -5.03 | -2.17 | NM_030650.1    | Homo sapiens KIAA1715 (KIAA1715), mRNA.                                                          |
| KLHL8    | -5.02 | -2.11 | NM_020803.3    | Homo sapiens kelch-like 8 (Drosophila) (KLHL8), mRNA.                                            |
| AP1S2    | -5    | -2.13 | NM_003916.3    | Homo sapiens adaptor-related protein complex 1, sigma 2 subunit (AP1S2), mRNA.                   |
| NFIX     | -4.99 | -2.1  | NM_002501.2    | Homo sapiens nuclear factor I/X (CCAAT-binding transcription factor) (NFIX), mRNA.               |
| SAP30    | -4.99 | -2.2  | NM_003864.3    | Homo sapiens Sin3A-associated protein, 30kDa (SAP30), mRNA.                                      |
| MAT2B    | -4.99 | -2.22 | NM_013283.3    | Homo sapiens methionine adenosyltransferase II, beta (MAT2B), 1, mRNA.                           |
| PPFIA1   | -4.98 | -2.13 | NM_177423.1    | Homo sapiens protein tyrosine phosphatase, receptor type, f polypeptide (PTPRF)                  |
| AK3L1    | -4.95 | -2.2  | NM_013410.2    | Homo sapiens adenylate kinase 3-like 1 (AK3L1), variant 6, mRNA.                                 |
| FLJ33790 | -4.95 | -2.12 | NM_001039548.1 | Homo sapiens hypothetical protein FLJ33790 (FLJ33790), mRNA.                                     |
| FKBP5    | -4.92 | -2.06 | NM_004117.2    | Homo sapiens FK506 binding protein 5 (FKBP5), mRNA.                                              |
| ERBB3    | -4.87 | -2.08 | NM_001982.2    | Homo sapiens v-erb-b2 erythroblastic leukemia viral oncogene homolog 3 (avian) (ERBB3), 1, mRNA. |
| DEK      | -4.86 | -2.27 | NM_003472.2    | Homo sapiens DEK oncogene (DNA binding) (DEK), mRNA.                                             |
| TCEAL1   | -4.86 | -2.04 | NM_001006639.1 | Homo sapiens transcription elongation factor A (SII)-like 1 (TCEAL1), 2, mRNA.                   |
| TCEAL1   | -4.84 | -2.09 | NM_001006639.1 | Homo sapiens transcription elongation factor A (SII)-like 1 (TCEAL1), 2, mRNA.                   |
| LYSMD2   | -4.84 | -2.07 | NM_153374.1    | Homo sapiens LysM, putative peptidoglycan-binding, domain containing 2 (LYSMD2), mRNA.           |
| ACSL5    | -4.81 | -2.12 | NM_016234.3    | Homo sapiens acyl-CoA synthetase long-chain family member 5 (ACSL5), 1, mRNA.                    |
| ACTL6A   | -4.79 | -2.05 | NM_004301.3    | Homo sapiens actin-like 6A (ACTL6A), 1, mRNA.                                                    |
| BIRC5    | -4.78 | -2.01 | NM_001012271.1 | Homo sapiens baculoviral IAP repeat-containing 5 (survivin) (BIRC5), 3, mRNA.                    |
| CDCA3    | -4.75 | -2.04 | NM_031299.3    | Homo sapiens cell division cycle associated 3 (CDCA3), mRNA.                                     |
| RUNX3    | -4.74 | -2    | NM_004350.2    | Homo sapiens runt-related transcription factor 3 (RUNX3), 2, mRNA.                               |
| E2F2     | -4.73 | -2.11 | NM_004091.2    | Homo sapiens E2F transcription factor 2 (E2F2), mRNA.                                            |
| NIN      | -4.73 | -2.06 | NM_020921.3    | Homo sapiens ninein (GSK3B interacting protein) (NIN), 2, mRNA.                                  |
| DEPDC1   | -4.67 | -2.11 | NM_017779.3    | Homo sapiens DEP domain containing 1 (DEPDC1), mRNA.                                             |
| KIF2C    | -4.67 | -2.1  | NM_006845.2    | Homo sapiens kinesin family member 2C (KIF2C), mRNA.                                             |
| NRP1     | -4.67 | -1.99 | NM_003873.4    | Homo sapiens neuropilin 1 (NRP1), 1, mRNA.                                                       |
| FYCO1    | -4.66 | -2    | NM_024513.1    | Homo sapiens FYVE and coiled-coil domain containing 1 (FYCO1), mRNA.                             |
| KIF23    | -4.65 | -2.08 | NM_004856.4    | Homo sapiens kinesin family member 23 (KIF23), 2, mRNA.                                          |
| CXCR4    | -4.63 | -1.97 | NM_003467.2    | Homo sapiens chemokine (C-X-C motif) receptor 4 (CXCR4), 2, mRNA.                                |
| TSEN2    | -4.6  | -2.04 | NM_025265.2    | Homo sapiens tRNA splicing endonuclease 2 homolog (S. cerevisiae) (TSEN2), mRNA.                 |
| EVI1     | -4.6  | -2    | NM_005241.1    | Homo sapiens ecotropic viral integration site 1 (EVI1), mRNA.                                    |
| CP110    | -4.59 | -2.05 | NM_014711.3    | Homo sapiens CP110 protein (CP110), mRNA.                                                        |
| MCM10    | -4.59 | -2.04 | NM_018518.3    | Homo sapiens minichromosome maintenance complex component 10 (MCM10), 2, mRNA.                   |
| CCNA2    | -4.58 | -2.07 | NM_001237.2    | Homo sapiens cyclin A2 (CCNA2), mRNA.                                                            |
| HSD17B11 | -4.57 | -2    | NM_016245.2    | Homo sapiens hydroxysteroid (17-beta) dehydrogenase 11 (HSD17B11), mRNA.                         |
| CLCC1    | -4.56 | -1.95 | NM_015127.3    | Homo sapiens chloride channel CLIC-like 1 (CLCC1), 2, mRNA.                                      |

|          |       |       |                |                                                                                        |
|----------|-------|-------|----------------|----------------------------------------------------------------------------------------|
| TRAPPC4  | -4.55 | -2.06 | NM_016146.3    | Homo sapiens trafficking protein particle complex 4 (TRAPPC4), mRNA.                   |
| RFC5     | -4.55 | -2.08 | NM_007370.3    | Homo sapiens replication factor C (activator 1) 5, 36.5kDa (RFC5), 1, mRNA.            |
| HSPA4L   | -4.53 | -2.01 | NM_014278.2    | Homo sapiens heat shock 70kDa protein 4-like (HSPA4L), mRNA.                           |
| CXCR4    | -4.52 | -1.95 | NM_001008540.1 | Homo sapiens chemokine (C-X-C motif) receptor 4 (CXCR4), 1, mRNA.                      |
| EFHD1    | -4.5  | -2.04 | NM_025202.2    | Homo sapiens EF-hand domain family, member D1 (EFHD1), mRNA.                           |
| AURKB    | -4.49 | -2.02 | NM_004217.2    | Homo sapiens aurora kinase B (AURKB), mRNA.                                            |
| C5orf30  | -4.48 | -1.98 | NM_033211.2    | Homo sapiens chromosome 5 open reading frame 30 (C5orf30), mRNA.                       |
| AK3L1    | -4.45 | -1.97 | NM_203464.1    | Homo sapiens adenylate kinase 3-like 1 (AK3L1), variant 7, mRNA.                       |
| MPHOSPH1 | -4.45 | -2.05 | NM_016195.2    | Homo sapiens M-phase phosphoprotein 1 (MPHOSPH1), mRNA.                                |
| KIF20A   | -4.42 | -2    | NM_005733.1    | Homo sapiens kinesin family member 20A (KIF20A), mRNA.                                 |
| SLC25A19 | -4.39 | -1.94 | NM_021734.3    | Homo sapiens solute carrier family 25 (mitochondrial thiamine pyrophosphate carrier)   |
| TROAP    | -4.39 | -1.94 | NM_005480.2    | Homo sapiens trophinin associated protein (tastin) (TROAP), mRNA.                      |
| KLHL8    | -4.39 | -1.96 | NM_020803.3    | Homo sapiens kelch-like 8 (Drosophila) (KLHL8), mRNA.                                  |
| RAD51AP1 | -4.37 | -2.03 | NM_006479.3    | Homo sapiens RAD51 associated protein 1 (RAD51AP1), mRNA.                              |
| TPX2     | -4.37 | -1.95 | NM_012112.4    | Homo sapiens TPX2, microtubule-associated, homolog (Xenopus laevis) (TPX2), mRNA.      |
| HNRPUL1  | -4.37 | -1.99 | NM_144732.1    | Homo sapiens heterogeneous nuclear ribonucleoprotein U-like 1 (HNRPUL1), 4, mRNA.      |
| FAM111A  | -4.36 | -1.89 | NM_022074.2    | Homo sapiens family with sequence similarity 111, member A (FAM111A), 1, mRNA.         |
| FAM46C   | -4.36 | -1.98 | NM_017709.3    | Homo sapiens family with sequence similarity 46, member C (FAM46C), mRNA.              |
| RAN      | -4.35 | -1.96 | NM_006325.2    | Homo sapiens RAN, member RAS oncogene family (RAN), mRNA.                              |
| ABHD10   | -4.33 | -1.91 | NM_018394.1    | Homo sapiens abhydrolase domain containing 10 (ABHD10), mRNA.                          |
| C5orf23  | -4.33 | -1.84 | NM_024563.3    | Homo sapiens chromosome 5 open reading frame 23 (C5orf23), mRNA.                       |
| NR2F2    | -4.32 | -1.91 | NM_021005.2    | Homo sapiens nuclear receptor subfamily 2, group F, member 2 (NR2F2), mRNA.            |
| EXO1     | -4.32 | -2.06 | NM_006027.3    | Homo sapiens exonuclease 1 (EXO1), 1, mRNA.                                            |
| C19orf51 | -4.32 | -1.9  | NM_178837.3    | Homo sapiens chromosome 19 open reading frame 51 (C19orf51), mRNA.                     |
| NOLC1    | -4.3  | -2    | NM_004741.1    | Homo sapiens nucleolar and coiled-body phosphoprotein 1 (NOLC1), mRNA.                 |
| PAQR4    | -4.29 | -1.99 | NM_152341.2    | Homo sapiens progesterin and adipoQ receptor family member IV (PAQR4), mRNA.           |
| CKAP2L   | -4.28 | -1.96 | NM_152515.2    | Homo sapiens cytoskeleton associated protein 2-like (CKAP2L), mRNA.                    |
| BAZ1A    | -4.27 | -1.97 | NM_182648.1    | Homo sapiens bromodomain adjacent to zinc finger domain, 1A (BAZ1A), 2, mRNA.          |
| CDK2     | -4.26 | -1.82 | NM_001798.2    | Homo sapiens cyclin-dependent kinase 2 (CDK2), 1, mRNA.                                |
| POLE2    | -4.26 | -1.92 | NM_002692.2    | Homo sapiens polymerase (DNA directed), epsilon 2 (p59 subunit) (POLE2), mRNA.         |
| TSEN34   | -4.25 | -1.95 | NM_001077446.1 | Homo sapiens tRNA splicing endonuclease 34 homolog (S. cerevisiae) (TSEN34), 2, mRNA.  |
| RAB7L1   | -4.23 | -1.87 | NM_003929.1    | Homo sapiens RAB7, member RAS oncogene family-like 1 (RAB7L1), mRNA.                   |
| AK3L1    | -4.23 | -1.97 | NM_203464.1    | Homo sapiens adenylate kinase 3-like 1 (AK3L1), variant 7, mRNA.                       |
| ASF1A    | -4.23 | -1.91 | NM_014034.1    | Homo sapiens ASF1 anti-silencing function 1 homolog A (S. cerevisiae) (ASF1A), mRNA.   |
| CHAC2    | -4.23 | -1.89 | NM_001008708.1 | Homo sapiens ChaC, cation transport regulator homolog 2 (E. coli) (CHAC2), mRNA.       |
| BTN3A2   | -4.23 | -1.85 | NM_007047.3    | Homo sapiens butyrophilin, subfamily 3, member A2 (BTN3A2), mRNA.                      |
| DYNC2H1  | -4.22 | -1.87 | NM_001080463.1 | Homo sapiens dynein, cytoplasmic 2, heavy chain 1 (DYNC2H1), mRNA.                     |
| HORMAD1  | -4.22 | -1.88 | NM_032132.3    | Homo sapiens HORMA domain containing 1 (HORMAD1), mRNA.                                |
|          | -4.22 | -1.87 | BX537823       | Homo sapiens mRNA; cDNA DKFZp686J23256 (from clone DKFZp686J23256)                     |
| GPT2     | -4.21 | -1.93 | NM_133443.1    | Homo sapiens glutamic pyruvate transaminase (alanine aminotransferase) 2 (GPT2), mRNA. |
| FAM83D   | -4.21 | -1.9  | NM_030919.2    | Homo sapiens family with sequence similarity 83, member D (FAM83D), mRNA.              |
| NUSAP1   | -4.2  | -2.04 | NM_018454.5    | Homo sapiens nucleolar and spindle associated protein 1 (NUSAP1), 2, mRNA.             |
| XTP3TPA  | -4.2  | -1.98 | NM_024096.1    | Homo sapiens XTP3-transactivated protein A (XTP3TPA), mRNA.                            |
| C1orf2   | -4.2  | -2    | NM_006589.2    | Homo sapiens chromosome 1 open reading frame 2 (C1orf2), 1, mRNA.                      |
| HMGB2    | -4.19 | -1.97 | NM_002129.2    | Homo sapiens high-mobility group box 2 (HMGB2), mRNA.                                  |
| FAM122B  | -4.19 | -1.96 | NM_145284.3    | Homo sapiens family with sequence similarity 122B (FAM122B), mRNA.                     |
| KIF11    | -4.18 | -1.94 | NM_004523.2    | Homo sapiens kinesin family member 11 (KIF11), mRNA.                                   |
| HSD17B6  | -4.18 | -1.85 | NM_003725.2    | Homo sapiens hydroxysteroid (17-beta) dehydrogenase 6 homolog (mouse) (HSD17B6), mRNA. |
| ODF2     | -4.16 | -1.89 | NM_002540.3    | Homo sapiens outer dense fiber of sperm tails 2 (ODF2), 1, mRNA.                       |

|           |       |                      |                                                                                               |
|-----------|-------|----------------------|-----------------------------------------------------------------------------------------------|
| SLC2A4RG  | -4.15 | -1.85 NM_020062.3    | Homo sapiens SLC2A4 regulator (SLC2A4RG), mRNA.                                               |
| FLJ20160  | -4.12 | -1.84 NM_017694.3    | Homo sapiens FLJ20160 protein (FLJ20160), mRNA.                                               |
| PLK4      | -4.11 | -1.93 NM_014264.3    | Homo sapiens polo-like kinase 4 (Drosophila) (PLK4), mRNA.                                    |
| SMC4      | -4.1  | -1.99 NM_001002800.1 | Homo sapiens structural maintenance of chromosomes 4 (SMC4), 2, mRNA.                         |
| CNOT6     | -4.09 | -1.83 NM_015455.3    | Homo sapiens CCR4-NOT transcription complex, subunit 6 (CNOT6), mRNA.                         |
| PRC1      | -4.09 | -1.96 NM_199413.1    | Homo sapiens protein regulator of cytokinesis 1 (PRC1), 2, mRNA.                              |
| MAD2L1    | -4.08 | -1.92 NM_002358.2    | Homo sapiens MAD2 mitotic arrest deficient-like 1 (yeast) (MAD2L1), mRNA.                     |
| TAP2      | -4.07 | -1.87 NM_000544.3    | Homo sapiens transporter 2, ATP-binding cassette, sub-family B (MDR/TAP) (TAP2), 1, mRNA.     |
| ADORA1    | -4.07 | -1.84 NM_000674.1    | Homo sapiens adenosine A1 receptor (ADORA1), mRNA.                                            |
| HIRIP3    | -4.06 | -1.86 NM_003609.2    | Homo sapiens HIRA interacting protein 3 (HIRIP3), mRNA.                                       |
| MLLT6     | -4.05 | -1.87 NM_005937.3    | Homo sapiens myeloid/lymphoid or mixed-lineage leukemia (trithorax homolog, Drosophila) mRNA. |
| LOC389816 | -4.05 | -1.9 NM_001013653.1  | Homo sapiens cytokeratin associated protein (LOC389816), mRNA.                                |
| TEX2      | -4.04 | -1.93 NM_018469.3    | Homo sapiens testis expressed 2 (TEX2), mRNA.                                                 |
| TSEN34    | -4.03 | -1.84 NM_001077446.1 | Homo sapiens tRNA splicing endonuclease 34 homolog (S. cerevisiae) (TSEN34), 2, mRNA.         |
| ACSL5     | -4.03 | -1.79 NM_203379.1    | Homo sapiens acyl-CoA synthetase long-chain family member 5 (ACSL5), 2, mRNA.                 |
| SUV39H1   | -4.03 | -1.88 NM_003173.2    | Homo sapiens suppressor of variegation 3-9 homolog 1 (Drosophila) (SUV39H1), mRNA.            |
| HPRT1     | -4    | -1.95 NM_000194.1    | Homo sapiens hypoxanthine phosphoribosyltransferase 1 (Lesch-Nyhan syndrome) (HPRT1), mRNA.   |
| ATP6V0A2  | -4    | -1.83 NM_012463.2    | Homo sapiens ATPase, H+ transporting, lysosomal V0 subunit a2 (ATP6V0A2), mRNA.               |
| PSMC3IP   | -3.99 | -1.77 NM_016556.1    | Homo sapiens PSMC3 interacting protein (PSMC3IP), 2, mRNA.                                    |
| LARP2     | -3.98 | -1.86 NM_032239.2    | Homo sapiens La ribonucleoprotein domain family, member 2 (LARP2), 3, mRNA.                   |
| ACYP1     | -3.97 | -1.9 NM_001107.3     | Homo sapiens acylphosphatase 1, erythrocyte (common) type (ACYP1), 1, mRNA.                   |
| HMMR      | -3.97 | -1.92 NM_012484.1    | Homo sapiens hyaluronan-mediated motility receptor (RHAMM) (HMMR), 1, mRNA.                   |
| SORD      | -3.96 | -1.8 NM_003104.3     | Homo sapiens sorbitol dehydrogenase (SORD), mRNA.                                             |
| MGC61598  | -3.96 | -1.84 XM_939432.1    | PREDICTED: Homo sapiens similar to ankyrin-repeat protein Nrarp (MGC61598), mRNA.             |
| LAP3      | -3.95 | -1.86 NM_015907.2    | Homo sapiens leucine aminopeptidase 3 (LAP3), mRNA.                                           |
| BICD2     | -3.95 | -1.87 NM_001003800.1 | Homo sapiens bicaudal D homolog 2 (Drosophila) (BICD2), 1, mRNA.                              |
| HPRT1     | -3.94 | -1.91 NM_000194.1    | Homo sapiens hypoxanthine phosphoribosyltransferase 1 (Lesch-Nyhan syndrome) (HPRT1), mRNA.   |
| ICMT      | -3.94 | -1.79 NM_012405.3    | Homo sapiens isoprenylcysteine carboxyl methyltransferase (ICMT), mRNA.                       |
| SRPK1     | -3.94 | -1.91 NM_003137.3    | Homo sapiens SFRS protein kinase 1 (SRPK1), mRNA.                                             |
| RPA2      | -3.94 | -1.91 NM_002946.3    | Homo sapiens replication protein A2, 32kDa (RPA2), mRNA.                                      |
| FAM64A    | -3.94 | -1.78 NM_019013.1    | Homo sapiens family with sequence similarity 64, member A (FAM64A), mRNA.                     |
| ANKRD29   | -3.94 | -1.77 NM_173505.2    | Homo sapiens ankyrin repeat domain 29 (ANKRD29), mRNA.                                        |
| IFNAR1    | -3.93 | -1.77 NM_000629.2    | Homo sapiens interferon (alpha, beta and omega) receptor 1 (IFNAR1), mRNA.                    |
| KBTBD6    | -3.93 | -1.75 NM_152903.4    | Homo sapiens kelch repeat and BTB (POZ) domain containing 6 (KBTBD6), mRNA.                   |
| NKIRAS1   | -3.92 | -1.82 NM_020345.3    | Homo sapiens NFkB inhibitor interacting Ras-like 1 (NKIRAS1), mRNA.                           |
| NUDT21    | -3.92 | -1.86 NM_007006.2    | Homo sapiens nudix (nucleoside diphosphate linked moiety X)-type motif 21 (NUDT21), mRNA.     |
| CDCA1     | -3.92 | -1.73 NM_145697.1    | Homo sapiens cell division cycle associated 1 (CDCA1), 1, mRNA.                               |
| FAM129A   | -3.92 | -1.83 NM_052966.2    | Homo sapiens family with sequence similarity 129, member A (FAM129A), 2, mRNA.                |
| DEPDC1B   | -3.91 | -1.84 NM_018369.1    | Homo sapiens DEP domain containing 1B (DEPDC1B), mRNA.                                        |
| LHX6      | -3.91 | -1.78 NM_199160.2    | Homo sapiens LIM homeobox 6 (LHX6), 2, mRNA.                                                  |
| CDCA7     | -3.9  | -1.86 NM_031942.4    | Homo sapiens cell division cycle associated 7 (CDCA7), 1, mRNA.                               |
| C1orf24   | -3.9  | -1.83 NM_052966.1    | Homo sapiens chromosome 1 open reading frame 24 (C1orf24), 2, mRNA.                           |
| SLC30A3   | -3.9  | -1.78 NM_003459.4    | Homo sapiens solute carrier family 30 (zinc transporter), member 3 (SLC30A3), mRNA.           |
| PGM5      | -3.9  | -1.77 NM_021965.3    | Homo sapiens phosphoglucomutase 5 (PGM5), mRNA.                                               |
| TMEM64    | -3.9  | -1.79 NM_001008495.2 | Homo sapiens transmembrane protein 64 (TMEM64), mRNA.                                         |
| ALDH1L2   | -3.89 | -1.76 XM_927536.1    | PREDICTED: Homo sapiens aldehyde dehydrogenase 1 family, member L2 (ALDH1L2), mRNA.           |
| MND1      | -3.88 | -1.79 NM_032117.2    | Homo sapiens meiotic nuclear divisions 1 homolog (S. cerevisiae) (MND1), mRNA.                |
| NEK2      | -3.87 | -1.9 NM_002497.2     | Homo sapiens NIMA (never in mitosis gene a)-related kinase 2 (NEK2), mRNA.                    |
| KIFC1     | -3.87 | -1.83 NM_002263.2    | Homo sapiens kinesin family member C1 (KIFC1), mRNA.                                          |

|         |       |       |                |                                                                                               |
|---------|-------|-------|----------------|-----------------------------------------------------------------------------------------------|
| ERCC6L  | -3.87 | -1.78 | NM_017669.2    | Homo sapiens excision repair cross-complementing rodent repair deficiency (ERCC6L), mRNA.     |
| ERCC6L  | -3.87 | -1.74 | NM_017669.2    | Homo sapiens excision repair cross-complementing rodent repair deficiency (ERCC6L), mRNA.     |
| TESC    | -3.87 | -1.77 | NM_017899.2    | Homo sapiens tescalcin (TESC), mRNA.                                                          |
| PRPS2   | -3.86 | -1.86 | NM_001039091.1 | Homo sapiens phosphoribosyl pyrophosphate synthetase 2 (PRPS2), 1, mRNA.                      |
| GOLSYN  | -3.85 | -1.78 | NM_001099743.1 | Homo sapiens Golgi-localized protein (GOLSYN), 7, mRNA.                                       |
| LRRC26  | -3.85 | -1.83 | NM_001013653.2 | Homo sapiens leucine rich repeat containing 26 (LRRC26), mRNA.                                |
| DLK2    | -3.85 | -1.75 | NM_206539.1    | Homo sapiens delta-like 2 homolog (Drosophila) (DLK2), 2, mRNA.                               |
| CNKSR3  | -3.84 | -1.76 | NM_173515.2    | Homo sapiens CNKSR family member 3 (CNKSR3), mRNA.                                            |
| HMMR    | -3.82 | -1.88 | NM_012485.1    | Homo sapiens hyaluronan-mediated motility receptor (RHAMM) (HMMR), 2, mRNA.                   |
| WBSCR22 | -3.82 | -1.84 | NM_017528.2    | Homo sapiens Williams Beuren syndrome chromosome region 22 (WBSCR22), mRNA.                   |
| F12     | -3.81 | -1.83 | NM_000505.3    | Homo sapiens coagulation factor XII (Hageman factor) (F12), mRNA.                             |
| RACGAP1 | -3.8  | -1.84 | NM_013277.2    | Homo sapiens Rac GTPase activating protein 1 (RACGAP1), mRNA.                                 |
|         | -3.8  | -1.83 | AK123915       | Homo sapiens cDNA FLJ41921 fis, clone PERIC2002766                                            |
| FBXO43  | -3.79 | -1.74 | NM_001029860.2 | Homo sapiens F-box protein 43 (FBXO43), 2, mRNA.                                              |
| MAD2L1  | -3.79 | -1.75 | NM_002358.2    | Homo sapiens MAD2 mitotic arrest deficient-like 1 (yeast) (MAD2L1), mRNA.                     |
| TTK     | -3.78 | -1.84 | NM_003318.3    | Homo sapiens TTK protein kinase (TTK), mRNA.                                                  |
| NCAPG   | -3.78 | -1.88 | NM_022346.3    | Homo sapiens non-SMC condensin I complex, subunit G (NCAPG), mRNA.                            |
| TMEM50B | -3.78 | -1.79 | NM_006134.5    | Homo sapiens transmembrane protein 50B (TMEM50B), mRNA.                                       |
| POLR1E  | -3.77 | -1.86 | NM_022490.1    | Homo sapiens polymerase (RNA) I polypeptide E, 53kDa (POLR1E), mRNA.                          |
| CCNB2   | -3.77 | -1.85 | NM_004701.2    | Homo sapiens cyclin B2 (CCNB2), mRNA.                                                         |
| CKLF    | -3.77 | -1.93 | NM_001040138.1 | Homo sapiens chemokine-like factor (CKLF), 5, mRNA.                                           |
| VAMP3   | -3.76 | -1.82 | NM_004781.3    | Homo sapiens vesicle-associated membrane protein 3 (cellubrevin) (VAMP3), mRNA.               |
| CDC2    | -3.76 | -1.8  | NM_001786.2    | Homo sapiens cell division cycle 2, G1 to S and G2 to M (CDC2), 1, mRNA.                      |
| DIAPH3  | -3.75 | -1.77 | NM_001042517.1 | Homo sapiens diaphanous homolog 3 (Drosophila) (DIAPH3), 1, mRNA.                             |
| HLA-B   | -3.74 | -1.73 | NM_005514.5    | Homo sapiens major histocompatibility complex, class I, B (HLA-B), mRNA.                      |
| EIF2C1  | -3.72 | -1.69 | NM_012199.2    | Homo sapiens eukaryotic translation initiation factor 2C, 1 (EIF2C1), mRNA.                   |
| CENPA   | -3.72 | -1.75 | NM_001042426.1 | Homo sapiens centromere protein A (CENPA), 2, mRNA.                                           |
| PSRC1   | -3.72 | -1.78 | NM_001032290.1 | Homo sapiens proline/serine-rich coiled-coil 1 (PSRC1), 4, mRNA.                              |
| DLG7    | -3.71 | -1.79 | NM_014750.3    | Homo sapiens discs, large homolog 7 (Drosophila) (DLG7), mRNA.                                |
| ATP7B   | -3.71 | -1.77 | NM_000053.2    | Homo sapiens ATPase, Cu <sup>++</sup> transporting, beta polypeptide (ATP7B), 1, mRNA.        |
| ARL6IP1 | -3.68 | -1.87 | NM_015161.1    | Homo sapiens ADP-ribosylation factor-like 6 interacting protein 1 (ARL6IP1), mRNA.            |
| LRPPRC  | -3.68 | -1.79 | NM_133259.2    | Homo sapiens leucine-rich PPR-motif containing (LRPPRC), mRNA.                                |
| KIF15   | -3.66 | -1.74 | NM_020242.1    | Homo sapiens kinesin family member 15 (KIF15), mRNA.                                          |
| HARS    | -3.65 | -1.81 | NM_002109.3    | Homo sapiens histidyl-tRNA synthetase (HARS), mRNA.                                           |
| RDH11   | -3.65 | -1.8  | NM_016026.2    | Homo sapiens retinol dehydrogenase 11 (all-trans/9-cis/11-cis) (RDH11), mRNA.                 |
| CDCA2   | -3.65 | -1.74 | NM_152562.2    | Homo sapiens cell division cycle associated 2 (CDCA2), mRNA.                                  |
| BRP44L  | -3.65 | -1.83 | NM_016098.1    | Homo sapiens brain protein 44-like (BRP44L), mRNA.                                            |
| CCDC18  | -3.65 | -1.75 | NM_206886.2    | Homo sapiens coiled-coil domain containing 18 (CCDC18), mRNA.                                 |
| DICER1  | -3.64 | -1.72 | NM_030621.2    | Homo sapiens Dicer1, Dcr-1 homolog (Drosophila) (DICER1), 2, mRNA.                            |
| DLEU1   | -3.64 | -1.71 | NR_002605.1    | Homo sapiens deleted in lymphocytic leukemia, 1 (DLEU1) on chromosome 13.                     |
| PTTG3   | -3.64 | -1.88 | NR_002734.1    | Homo sapiens pituitary tumor-transforming 3 (PTTG3) on chromosome 8.                          |
| KBTBD6  | -3.64 | -1.68 | NM_152903.4    | Homo sapiens kelch repeat and BTB (POZ) domain containing 6 (KBTBD6), mRNA.                   |
| NEK2    | -3.63 | -1.71 | NM_002497.2    | Homo sapiens NIMA (never in mitosis gene a)-related kinase 2 (NEK2), mRNA.                    |
| FKBP4   | -3.63 | -1.79 | NM_002014.2    | Homo sapiens FK506 binding protein 4, 59kDa (FKBP4), mRNA.                                    |
| KCTD20  | -3.63 | -1.75 | NM_173562.3    | Homo sapiens potassium channel tetramerisation domain containing 20 (KCTD20), mRNA.           |
| NDC80   | -3.62 | -1.75 | NM_006101.1    | Homo sapiens NDC80 homolog, kinetochore complex component (S. cerevisiae) (NDC80), mRNA.      |
| BUB1B   | -3.62 | -1.71 | NM_001211.4    | Homo sapiens BUB1 budding uninhibited by benzimidazoles 1 homolog beta (yeast) (BUB1B), mRNA. |
| DIAPH3  | -3.62 | -1.71 | NM_001042517.1 | Homo sapiens diaphanous homolog 3 (Drosophila) (DIAPH3), 1, mRNA.                             |
| RBM13   | -3.62 | -1.77 | NM_032509.2    | Homo sapiens RNA binding motif protein 13 (RBM13), mRNA.                                      |

|           |       |                      |                                                                                                                   |
|-----------|-------|----------------------|-------------------------------------------------------------------------------------------------------------------|
| APOBEC3B  | -3.62 | -1.74 NM_004900.3    | Homo sapiens apolipoprotein B mRNA editing enzyme, catalytic polypeptide-like 3B (APOBEC3B), mRNA.                |
| TTC33     | -3.62 | -1.77 NM_012382.2    | Homo sapiens tetratricopeptide repeat domain 33 (TTC33), mRNA.                                                    |
| FBXW11    | -3.61 | -1.78 NM_033645.2    | Homo sapiens F-box and WD repeat domain containing 11 (FBXW11), 1, mRNA.                                          |
| RELA      | -3.61 | -1.72 NM_021975.2    | Homo sapiens v-rel reticuloendotheliosis viral oncogene homolog A                                                 |
| MBD2      | -3.6  | -1.66 NM_003927.3    | Homo sapiens methyl-CpG binding domain protein 2 (MBD2), 1, mRNA.                                                 |
| SP110     | -3.6  | -1.69 NM_004510.2    | Homo sapiens SP110 nuclear body protein (SP110), b, mRNA.                                                         |
| CENTD3    | -3.59 | -1.75 NM_022481.5    | Homo sapiens centaurin, delta 3 (CENTD3), mRNA.                                                                   |
| CKLF      | -3.58 | -1.84 NM_001040139.1 | Homo sapiens chemokine-like factor (CKLF), 6, mRNA.                                                               |
| ECT2      | -3.58 | -1.82 NM_018098.4    | Homo sapiens epithelial cell transforming sequence 2 oncogene (ECT2), mRNA.                                       |
| FBXO43    | -3.57 | -1.66 NM_001029860.2 | Homo sapiens F-box protein 43 (FBXO43), 2, mRNA.                                                                  |
| CDC2      | -3.57 | -1.82 NM_001786.2    | Homo sapiens cell division cycle 2, G1 to S and G2 to M (CDC2), 1, mRNA.                                          |
| LYCAT     | -3.57 | -1.78 NM_001002257.1 | Homo sapiens lysocardiolipin acyltransferase (LYCAT), 2, mRNA.                                                    |
| NUF2      | -3.56 | -1.71 NM_031423.3    | Homo sapiens NUF2, NDC80 kinetochore complex component, homolog ( <i>S. cerevisiae</i> ) (NUF2)                   |
| MYC       | -3.56 | -1.82 NM_002467.3    | Homo sapiens v-myc myelocytomatosis viral oncogene homolog (avian) (MYC), mRNA.                                   |
| HSD17B8   | -3.56 | -1.7 NM_014234.3     | Homo sapiens hydroxysteroid (17-beta) dehydrogenase 8 (HSD17B8), mRNA.                                            |
| GSG2      | -3.56 | -1.67 NM_031965.2    | Homo sapiens germ cell associated 2 (haspin) (GSG2), mRNA.                                                        |
| C9orf140  | -3.55 | -1.71 NM_178448.2    | Homo sapiens chromosome 9 open reading frame 140 (C9orf140), mRNA.                                                |
| TMEM158   | -3.55 | -1.74 NM_015444.2    | Homo sapiens transmembrane protein 158 (TMEM158), mRNA.                                                           |
| AHI1      | -3.55 | -1.7 NM_017651.3     | Homo sapiens Abelson helper integration site 1 (AHI1), mRNA.                                                      |
| HAGHL     | -3.54 | -1.69 NM_207112.1    | Homo sapiens hydroxyacylglutathione hydrolase-like (HAGHL), 1, mRNA.                                              |
| SDC1      | -3.54 | -1.71 NM_001006946.1 | Homo sapiens syndecan 1 (SDC1), 1, mRNA.                                                                          |
| HDHD1A    | -3.53 | -1.69 NM_012080.3    | Homo sapiens haloacid dehalogenase-like hydrolase domain containing 1A (HDHD1A), mRNA.                            |
| ASB13     | -3.53 | -1.73 NM_024701.2    | Homo sapiens ankyrin repeat and SOCS box-containing 13 (ASB13), mRNA.                                             |
| ZAK       | -3.52 | -1.73 CR627122       | Homo sapiens mRNA; cDNA DKFZp779M2422 (from clone DKFZp779M2422)                                                  |
| BID       | -3.51 | -1.72 NM_133646.2    | Homo sapiens sterile alpha motif and leucine zipper containing kinase AZK (ZAK), 2, mRNA.                         |
| MXI1      | -3.51 | -1.69 NM_197966.1    | Homo sapiens BH3 interacting domain death agonist (BID), 1, mRNA.                                                 |
| MXI1      | -3.51 | -1.66 NM_130439.3    | Homo sapiens MAX interactor 1 (MXI1), 2, mRNA.                                                                    |
| GINS2     | -3.51 | -1.77 NM_016095.1    | Homo sapiens GINS complex subunit 2 (Psf2 homolog) (GINS2), mRNA.                                                 |
| GLB1L2    | -3.51 | -1.69 NM_138342.2    | Homo sapiens galactosidase, beta 1-like 2 (GLB1L2), mRNA.                                                         |
| RAB22A    | -3.5  | -1.72 NM_020673.2    | Homo sapiens RAB22A, member RAS oncogene family (RAB22A), mRNA.                                                   |
| LARP4     | -3.5  | -1.77 NM_052879.3    | Homo sapiens La ribonucleoprotein domain family, member 4 (LARP4), 1, mRNA.                                       |
| ABCE1     | -3.49 | -1.75 NM_001040876.1 | Homo sapiens ATP-binding cassette, sub-family E (OABP), member 1 (ABCE1), 2, mRNA.                                |
| PRNP      | -3.49 | -1.69 NM_183079.2    | Homo sapiens prion protein (p27-30) (Creutzfeldt-Jakob disease                                                    |
| CCL2      | -3.49 | -1.64 NM_002982.3    | Homo sapiens chemokine (C-C motif) ligand 2 (CCL2), mRNA.                                                         |
| STC2      | -3.49 | -1.68 NM_003714.2    | Homo sapiens stanniocalcin 2 (STC2), mRNA.                                                                        |
| ASF1B     | -3.49 | -1.68 NM_018154.2    | Homo sapiens ASF1 anti-silencing function 1 homolog B ( <i>S. cerevisiae</i> ) (ASF1B), mRNA.                     |
| UBR5      | -3.48 | -1.71 NM_015902.4    | Homo sapiens ubiquitin protein ligase E3 component n-recognin 5 (UBR5), mRNA.                                     |
| SRP9      | -3.48 | -1.88 NM_003133.2    | Homo sapiens signal recognition particle 9kDa (SRP9), mRNA.                                                       |
| SPC24     | -3.48 | -1.72 NM_182513.1    | Homo sapiens SPC24, NDC80 kinetochore complex component, homolog ( <i>S. cerevisiae</i> ) (SPC24), mRNA.          |
| LOC649841 | -3.48 | -1.68 XM_938906.2    | PREDICTED: Homo sapiens similar to protein immuno-reactive with anti-PTH polyclonal antibodies (LOC649841), mRNA. |
| PRR11     | -3.48 | -1.69 NM_018304.2    | Homo sapiens proline rich 11 (PRR11), mRNA.                                                                       |
| RAC1      | -3.47 | -1.68 NM_018890.2    | Homo sapiens ras-related C3 botulinum toxin substrate 1 (rho family, small GTP binding protein Rac1)              |
| BAZ1A     | -3.47 | -1.67 NM_013448.2    | Homo sapiens bromodomain adjacent to zinc finger domain, 1A (BAZ1A), 1, mRNA.                                     |
| NUSAP1    | -3.47 | -1.73 NM_018454.5    | Homo sapiens nucleolar and spindle associated protein 1 (NUSAP1), 2, mRNA.                                        |
| BARD1     | -3.47 | -1.69 NM_000465.1    | Homo sapiens BRCA1 associated RING domain 1 (BARD1), mRNA.                                                        |
| GPM6B     | -3.47 | -1.62 NM_001001995.1 | Homo sapiens glycoprotein M6B (GPM6B), 1, mRNA.                                                                   |
| ANKRD13B  | -3.47 | -1.61 NM_152345.4    | Homo sapiens ankyrin repeat domain 13B (ANKRD13B), mRNA.                                                          |
| RFC3      | -3.46 | -1.75 NM_002915.3    | Homo sapiens replication factor C (activator 1) 3, 38kDa (RFC3), 1, mRNA.                                         |
| C15orf23  | -3.46 | -1.69 NM_033286.2    | Homo sapiens chromosome 15 open reading frame 23 (C15orf23), mRNA.                                                |

|           |       |                      |                                                                                                         |
|-----------|-------|----------------------|---------------------------------------------------------------------------------------------------------|
| DOCK10    | -3.46 | -1.69 NM_014689.2    | Homo sapiens dedicator of cytokinesis 10 (DOCK10), mRNA.                                                |
| SYDE1     | -3.44 | -1.65 NM_033025.4    | Homo sapiens synapse defective 1, Rho GTPase, homolog 1 ( <i>C. elegans</i> ) (SYDE1), mRNA.            |
| PRNP      | -3.44 | -1.79 NM_001080121.1 | Homo sapiens prion protein (p27-30) (Creutzfeldt-Jakob disease)                                         |
| FANCG     | -3.44 | -1.74 NM_004629.1    | Homo sapiens Fanconi anemia, complementation group G (FANCG), mRNA.                                     |
| DICER1    | -3.43 | -1.62 NM_030621.2    | Homo sapiens Dicer1, Dcr-1 homolog ( <i>Drosophila</i> ) (DICER1), 2, mRNA.                             |
| ZHX1      | -3.43 | -1.66 NM_007222.3    | Homo sapiens zinc fingers and homeoboxes 1 (ZHX1), 2, mRNA.                                             |
| ALDH3A2   | -3.43 | -1.73 NM_001031806.1 | Homo sapiens aldehyde dehydrogenase 3 family, member A2 (ALDH3A2), 1, mRNA.                             |
| FAM120A   | -3.43 | -1.82 NM_014612.3    | Homo sapiens family with sequence similarity 120A (FAM120A), mRNA.                                      |
| MASTL     | -3.43 | -1.66 NM_032844.1    | Homo sapiens microtubule associated serine/threonine kinase-like (MASTL), mRNA.                         |
|           | -3.43 | -1.72 CR622439       | full-length cDNA clone CSODF005YI08 of Fetal brain of Homo sapiens (human)                              |
| CYP1B1    | -3.42 | -1.7 NM_000104.2     | Homo sapiens cytochrome P450, family 1, subfamily B, polypeptide 1 (CYP1B1), mRNA.                      |
| SASS6     | -3.42 | -1.7 NM_194292.1     | Homo sapiens spindle assembly 6 homolog ( <i>C. elegans</i> ) (SASS6), mRNA.                            |
| NFX1      | -3.41 | -1.65 NM_002504.3    | Homo sapiens nuclear transcription factor, X-box binding 1 (NFX1), 1, mRNA.                             |
| SRI       | -3.41 | -1.71 NM_003130.2    | Homo sapiens sorcin (SRI), 1, mRNA.                                                                     |
| KIF18A    | -3.39 | -1.68 NM_031217.2    | Homo sapiens kinesin family member 18A (KIF18A), mRNA.                                                  |
| UVRAG     | -3.39 | -1.64 NM_003369.3    | Homo sapiens UV radiation resistance associated gene (UVRAG), mRNA.                                     |
| ANLN      | -3.38 | -1.75 NM_018685.2    | Homo sapiens anillin, actin binding protein (ANLN), mRNA.                                               |
| PGAM5     | -3.37 | -1.69 XM_001126125.1 | PREDICTED: Homo sapiens phosphoglycerate mutase family member 5 (PGAM5), mRNA.                          |
| CCDC58    | -3.37 | -1.74 NM_001017928.2 | Homo sapiens coiled-coil domain containing 58 (CCDC58), mRNA.                                           |
| SP110     | -3.36 | -1.62 NM_004510.2    | Homo sapiens SP110 nuclear body protein (SP110), b, mRNA.                                               |
| MESP1     | -3.36 | -1.63 NM_018670.2    | Homo sapiens mesoderm posterior 1 homolog (mouse) (MESP1), mRNA.                                        |
| DPYSL2    | -3.36 | -1.77 NM_001386.4    | Homo sapiens dihydropyrimidinase-like 2 (DPYSL2), mRNA.                                                 |
| USP13     | -3.35 | -1.71 NM_003940.1    | Homo sapiens ubiquitin specific peptidase 13 (isopeptidase T-3) (USP13), mRNA.                          |
| PCYOX1    | -3.34 | -1.67 NM_016297.2    | Homo sapiens prenylcysteine oxidase 1 (PCYOX1), mRNA.                                                   |
| WDR67     | -3.34 | -1.69 NM_145647.2    | Homo sapiens WD repeat domain 67 (WDR67), mRNA.                                                         |
| RAI14     | -3.34 | -1.7 NM_015577.1     | Homo sapiens retinoic acid induced 14 (RAI14), mRNA.                                                    |
| RBBP8     | -3.34 | -1.74 NM_203291.1    | Homo sapiens retinoblastoma binding protein 8 (RBBP8), 2, mRNA.                                         |
| TXNDC12   | -3.34 | -1.68 NM_015913.2    | Homo sapiens thioredoxin domain containing 12 (endoplasmic reticulum) (TXNDC12), mRNA.                  |
| CHAF1B    | -3.33 | -1.69 NM_005441.2    | Homo sapiens chromatin assembly factor 1, subunit B (p60) (CHAF1B), mRNA.                               |
| RAB40B    | -3.33 | -1.66 NM_006822.1    | Homo sapiens RAB40B, member RAS oncogene family (RAB40B), mRNA.                                         |
| PHF19     | -3.33 | -1.65 NM_015651.1    | Homo sapiens PHD finger protein 19 (PHF19), 1, mRNA.                                                    |
| POLR3G    | -3.33 | -1.63 NM_006467.2    | Homo sapiens polymerase (RNA) III (DNA directed) polypeptide G (32kD) (POLR3G), mRNA.                   |
| SAC3D1    | -3.33 | -1.67 NM_013299.3    | Homo sapiens SAC3 domain containing 1 (SAC3D1), mRNA.                                                   |
| NASP      | -3.33 | -1.67 NM_002482.2    | Homo sapiens nuclear autoantigenic sperm protein (histone-binding) (NASP), 2, mRNA.                     |
| C11orf82  | -3.33 | -1.69 NM_145018.2    | Homo sapiens chromosome 11 open reading frame 82 (C11orf82), mRNA.                                      |
| HS2ST1    | -3.33 | -1.69 NM_012262.2    | Homo sapiens heparan sulfate 2-O-sulfotransferase 1 (HS2ST1), mRNA.                                     |
| HJURP     | -3.33 | -1.66 NM_018410.3    | Homo sapiens Holliday junction recognition protein (HJURP), mRNA.                                       |
| PRPS2     | -3.32 | -1.73 NM_001039091.1 | Homo sapiens phosphoribosyl pyrophosphate synthetase 2 (PRPS2), 1, mRNA.                                |
| PRIM1     | -3.32 | -1.74 NM_000946.2    | Homo sapiens primase, DNA, polypeptide 1 (49kDa) (PRIM1), mRNA.                                         |
| MAP3K5    | -3.32 | -1.6 NM_005923.3     | Homo sapiens mitogen-activated protein kinase kinase kinase 5 (MAP3K5), mRNA.                           |
| C13orf3   | -3.32 | -1.64 NM_145061.3    | Homo sapiens chromosome 13 open reading frame 3 (C13orf3), mRNA.                                        |
| MYO19     | -3.32 | -1.65 NM_001033580.1 | Homo sapiens myosin XIX (MYO19), 3, mRNA.                                                               |
| CDC20     | -3.31 | -1.77 NM_001255.2    | Homo sapiens cell division cycle 20 homolog ( <i>S. cerevisiae</i> ) (CDC20), mRNA.                     |
| P2RX5     | -3.31 | -1.63 NM_175080.1    | Homo sapiens purinergic receptor P2X, ligand-gated ion channel, 5 (P2RX5), 2, mRNA.                     |
| LOC653381 | -3.31 | -1.77 XR_017364.1    | PREDICTED: Homo sapiens similar to Sorbitol dehydrogenase (L-iditol 2-dehydrogenase) (LOC653381), mRNA. |
| CSTB      | -3.31 | -1.84 NM_000100.2    | Homo sapiens cystatin B (stefin B) (CSTB), mRNA.                                                        |
| C15orf23  | -3.31 | -1.63 NM_033286.1    | Homo sapiens chromosome 15 open reading frame 23 (C15orf23), mRNA.                                      |
| SACS      | -3.3  | -1.66 NM_014363.3    | Homo sapiens spastic ataxia of Charlevoix-Saguenay (sacsin) (SACS), mRNA.                               |
| HADHB     | -3.3  | -1.68 NM_000183.2    | Homo sapiens hydroxyacyl-Coenzyme A dehydrogenase/3-ketoacyl-Coenzyme A thiolaseprotein, mRNA.          |

|           |       |                      |                                                                                                                |
|-----------|-------|----------------------|----------------------------------------------------------------------------------------------------------------|
| ZNF800    | -3.3  | -1.67 NM_176814.3    | Homo sapiens zinc finger protein 800 (ZNF800), mRNA.                                                           |
| PTTG1     | -3.29 | -1.83 NM_004219.2    | Homo sapiens pituitary tumor-transforming 1 (PTTG1), mRNA.                                                     |
| C17orf58  | -3.29 | -1.69 NM_181656.3    | Homo sapiens chromosome 17 open reading frame 58 (C17orf58), 2, mRNA.                                          |
| LOC643287 | -3.29 | -1.75 XM_928075.2    | PREDICTED: Homo sapiens similar to prothymosin alpha, 1 (LOC643287), mRNA.                                     |
| DBNDD2    | -3.28 | -1.79 NM_001048223.1 | Homo sapiens dysbindin (dystrobrevin binding protein 1) domain containing 2 (DBNDD2), 3, mRNA.                 |
| PM20D2    | -3.27 | -1.62 NM_001010853.1 | Homo sapiens peptidase M20 domain containing 2 (PM20D2), mRNA.                                                 |
|           | -3.27 | -1.6 AK091091        | Homo sapiens cDNA FLJ33772 fis, clone BRSSN2000175                                                             |
| HELLS     | -3.27 | -1.68 NM_018063.3    | Homo sapiens helicase, lymphoid-specific (HELLS), mRNA.                                                        |
| C16orf48  | -3.26 | -1.65 NM_032140.1    | Homo sapiens chromosome 16 open reading frame 48 (C16orf48), mRNA.                                             |
|           | -3.26 | -1.7 AK026966        | Homo sapiens cDNA: FLJ23313 fis, clone HEP11919                                                                |
| MAP4K5    | -3.25 | -1.62 NM_006575.3    | Homo sapiens mitogen-activated protein kinase kinase kinase 5 (MAP4K5), 1, mRNA.                               |
| SNX5      | -3.24 | -1.6 NM_152227.1     | Homo sapiens sorting nexin 5 (SNX5), 1, mRNA.                                                                  |
| STX10     | -3.24 | -1.68 NM_003765.1    | Homo sapiens syntaxin 10 (STX10), mRNA.                                                                        |
| USP42     | -3.23 | -1.65 NM_032172.1    | Homo sapiens ubiquitin specific peptidase 42 (USP42), mRNA.                                                    |
| TTF2      | -3.23 | -1.72 NM_003594.3    | Homo sapiens transcription termination factor, RNA polymerase II (TTF2), mRNA.                                 |
| PCGF6     | -3.23 | -1.69 NM_032154.3    | Homo sapiens polycomb group ring finger 6 (PCGF6), 2, mRNA.                                                    |
| LCOR      | -3.23 | -1.65 NM_032440.1    | Homo sapiens ligand dependent nuclear receptor corepressor (LCOR), mRNA.                                       |
| BUB1      | -3.23 | -1.72 NM_004336.2    | Homo sapiens BUB1 budding uninhibited by benzimidazoles 1 homolog (yeast) (BUB1), mRNA.                        |
| GNPDA2    | -3.23 | -1.62 NM_138335.1    | Homo sapiens glucosamine-6-phosphate deaminase 2 (GNPDA2), mRNA.                                               |
| PUS7      | -3.22 | -1.69 NM_019042.3    | Homo sapiens pseudouridylyl synthase 7 homolog (S. cerevisiae) (PUS7), mRNA.                                   |
| PRMT1     | -3.22 | -1.68 NM_198318.1    | Homo sapiens protein arginine methyltransferase 1 (PRMT1), 3, mRNA.                                            |
| C14orf142 | -3.22 | -1.6 NM_032490.4     | Homo sapiens chromosome 14 open reading frame 142 (C14orf142), mRNA.                                           |
| KIAA0101  | -3.22 | -1.63 NM_001029989.1 | Homo sapiens KIAA0101 (KIAA0101), 2, mRNA.                                                                     |
| NCAPD3    | -3.22 | -1.66 NM_015261.2    | Homo sapiens non-SMC condensin II complex, subunit D3 (NCAPD3), mRNA.                                          |
| TEX15     | -3.21 | -1.62 NM_031271.3    | Homo sapiens testis expressed 15 (TEX15), mRNA.                                                                |
| SGOL1     | -3.2  | -1.61 NM_001012413.1 | Homo sapiens shugoshin-like 1 (S. pombe) (SGOL1), C1, mRNA.                                                    |
| PTTG1     | -3.2  | -1.73 NM_004219.2    | Homo sapiens pituitary tumor-transforming 1 (PTTG1), mRNA.                                                     |
| RNF150    | -3.2  | -1.64 NM_020724.1    | Homo sapiens ring finger protein 150 (RNF150), mRNA.                                                           |
| CDKN3     | -3.19 | -1.65 NM_005192.2    | Homo sapiens cyclin-dependent kinase inhibitor 3 (CDK2-associated dual specificity phosphatase) (CDKN3), mRNA. |
| EXOSC8    | -3.18 | -1.69 NM_181503.1    | Homo sapiens exosome component 8 (EXOSC8), mRNA.                                                               |
| LHX4      | -3.18 | -1.59 NM_033343.2    | Homo sapiens LIM homeobox 4 (LHX4), mRNA.                                                                      |
| AKAP11    | -3.17 | -1.61 NM_016248.2    | Homo sapiens A kinase (PRKA) anchor protein 11 (AKAP11), mRNA.                                                 |
| MMACHC    | -3.16 | -1.63 NM_015506.2    | Homo sapiens methylmalonic aciduria (cobalamin deficiency) cbIC type, with homocystinuria (MMACHC), mRNA.      |
| PDSS1     | -3.15 | -1.66 NM_014317.3    | Homo sapiens prenyl (decaprenyl) diphosphate synthase, subunit 1 (PDSS1), mRNA.                                |
| DIAPH3    | -3.15 | -1.56 NM_030932.3    | Homo sapiens diaphanous homolog 3 (Drosophila) (DIAPH3), 2, mRNA.                                              |
| WDR35     | -3.15 | -1.58 NM_001006657.1 | Homo sapiens WD repeat domain 35 (WDR35), 1, mRNA.                                                             |
| MRPL24    | -3.15 | -1.66 NM_024540.2    | Homo sapiens mitochondrial ribosomal protein L24 (MRPL24),                                                     |
|           | -3.15 | -1.65 BI024234       | CM3-MT0357-260101-690-b10 MT0357 Homo sapiens cDNA, mRNA sequence                                              |
| LOC440145 | -3.15 | -1.61 NM_001071775.1 | Homo sapiens similar to RIKEN cDNA 2410129H14 (LOC440145), mRNA.                                               |
| UHRF1     | -3.14 | -1.72 NM_001048201.1 | Homo sapiens ubiquitin-like, containing PHD and RING finger domains, 1 (UHRF1), 1, mRNA.                       |
| HIG2      | -3.14 | -1.56 NM_013332.3    | Homo sapiens hypoxia-inducible protein 2 (HIG2), 1, mRNA.                                                      |
| MYC       | -3.13 | -1.72 NM_002467.3    | Homo sapiens v-myc myelocytomatosis viral oncogene homolog (avian) (MYC), mRNA.                                |
| HLTF      | -3.13 | -1.7 NM_139048.2     | Homo sapiens helicase-like transcription factor (HLTF), 2, mRNA.                                               |
| SLC43A3   | -3.13 | -1.67 NM_017611.2    | Homo sapiens solute carrier family 43, member 3 (SLC43A3), mRNA.                                               |
| STX6      | -3.12 | -1.61 NM_005819.4    | Homo sapiens syntaxin 6 (STX6), mRNA.                                                                          |
| SDHALP1   | -3.12 | -1.59 NR_003264.1    | Homo sapiens succinate dehydrogenase complex, subunit A, flavoprotein pseudogene 1 (SDHALP1) chromosome 3.     |
| BLM       | -3.11 | -1.61 NM_000057.2    | Homo sapiens Bloom syndrome (BLM), mRNA.                                                                       |
| PPIL5     | -3.11 | -1.66 NM_203467.1    | Homo sapiens peptidylprolyl isomerase (cyclophilin)-like 5 (PPIL5), 3, mRNA.                                   |
| C12orf48  | -3.11 | -1.65 NM_017915.2    | Homo sapiens chromosome 12 open reading frame 48 (C12orf48), mRNA.                                             |



|           |       |       |                |                                                                                                             |
|-----------|-------|-------|----------------|-------------------------------------------------------------------------------------------------------------|
| MASTL     | -3.11 | -1.57 | NM_032844.1    | Homo sapiens microtubule associated serine/threonine kinase-like (MASTL), mRNA.                             |
| ZFP1      | -3.1  | -1.55 | NM_153688.2    | Homo sapiens zinc finger protein 1 homolog (mouse) (ZFP1), mRNA.                                            |
| CRIPT     | -3.1  | -1.61 | NM_014171.3    | Homo sapiens cysteine-rich PDZ-binding protein (CRIPT), mRNA.                                               |
| KIAA0157  | -3.1  | -1.65 | NM_032182.3    | Homo sapiens KIAA0157 (KIAA0157), mRNA.                                                                     |
| PRR7      | -3.1  | -1.55 | NM_030567.3    | Homo sapiens proline rich 7 (synaptic) (PRR7), mRNA.                                                        |
| PRMT3     | -3.1  | -1.69 | NM_005788.1    | Homo sapiens protein arginine methyltransferase 3 (PRMT3), mRNA.                                            |
| LOC644538 | -3.1  | -1.54 | XM_927661.2    | PREDICTED: Homo sapiens hypothetical protein LOC644538 (LOC644538), mRNA.                                   |
| HIST3H2A  | -3.09 | -1.58 | NM_033445.2    | Homo sapiens histone cluster 3, H2a (HIST3H2A), mRNA.                                                       |
| YWHAG     | -3.09 | -1.71 | NM_012479.2    | Homo sapiens tyrosine 3-monooxygenase/tryptophan 5-monooxygenase activation protein, YWHAG mRNA.            |
| MAT2B     | -3.09 | -1.46 | NM_013283.3    | Homo sapiens methionine adenosyltransferase II, beta (MAT2B), 1, mRNA.                                      |
| NEIL3     | -3.08 | -1.55 | NM_018248.1    | Homo sapiens nei endonuclease VIII-like 3 (E. coli) (NEIL3), mRNA.                                          |
| MCM3APAS  | -3.07 | -1.55 | NR_002776.1    | Homo sapiens MCM3 minichromosome maintenance deficient 3 (S. cerevisiae), MCM3APAS                          |
| EXOSC2    | -3.06 | -1.61 | NM_014285.4    | Homo sapiens exosome component 2 (EXOSC2), mRNA.                                                            |
| WDHD1     | -3.06 | -1.54 | NM_007086.2    | Homo sapiens WD repeat and HMG-box DNA binding protein 1 (WDHD1), 1, mRNA.                                  |
| PRIM1     | -3.06 | -1.62 | NM_000946.2    | Homo sapiens primase, DNA, polypeptide 1 (49kDa) (PRIM1), mRNA.                                             |
| FANCD2    | -3.06 | -1.66 | NM_001018115.1 | Homo sapiens Fanconi anemia, complementation group D2 (FANCD2), 2, mRNA.                                    |
| WNT10B    | -3.06 | -1.51 | NM_003394.2    | Homo sapiens wingless-type MMTV integration site family, member 10B (WNT10B), mRNA.                         |
| DDX10     | -3.06 | -1.64 | NM_004398.2    | Homo sapiens DEAD (Asp-Glu-Ala-Asp) box polypeptide 10 (DDX10), mRNA.                                       |
| SYT15     | -3.06 | -1.57 | NM_181519.2    | Homo sapiens synaptotagmin XV (SYT15), b, mRNA.                                                             |
| CENPH     | -3.06 | -1.56 | NM_022909.3    | Homo sapiens centromere protein H (CENPH), mRNA.                                                            |
| MGA       | -3.05 | -1.57 | NM_001080541.1 | Homo sapiens MAX gene associated (MGA), mRNA.                                                               |
| BRCA1     | -3.05 | -1.6  | NM_007299.2    | Homo sapiens breast cancer 1, early onset (BRCA1), BRCA1-delta14-17, mRNA.                                  |
| AHCTF1    | -3.05 | -1.63 | NM_015446.3    | Homo sapiens AT hook containing transcription factor 1 (AHCTF1), mRNA.                                      |
| SLC43A3   | -3.05 | -1.63 | NM_014096.2    | Homo sapiens solute carrier family 43, member 3 (SLC43A3), mRNA.                                            |
| MTHFD2    | -3.04 | -1.67 | NM_006636.3    | Homo sapiens methylenetetrahydrofolate dehydrogenase (NADP+ dependent) 2, MTHFD2                            |
| DCBLD2    | -3.04 | -1.62 | NM_080927.3    | Homo sapiens discoidin, CUB and LCCL domain containing 2 (DCBLD2), mRNA.                                    |
| SLC4A7    | -3.04 | -1.54 | NM_003615.3    | Homo sapiens solute carrier family 4, sodium bicarbonate cotransporter, member 7 (SLC4A7), mRNA.            |
| SRPRB     | -3.04 | -1.67 | NM_021203.2    | Homo sapiens signal recognition particle receptor, B subunit (SRPRB), mRNA.                                 |
| SPC25     | -3.04 | -1.59 | NM_020675.3    | Homo sapiens SPC25, NDC80 kinetochore complex component, homolog (S. cerevisiae) (SPC25), mRNA.             |
| LOX       | -3.03 | -1.54 | NM_002317.3    | Homo sapiens lysyl oxidase (LOX), mRNA.                                                                     |
| LIN9      | -3.03 | -1.6  | NM_173083.2    | Homo sapiens lin-9 homolog (C. elegans) (LIN9), mRNA.                                                       |
| LOC643911 | -3.03 | -1.6  | XM_931911.2    | PREDICTED: Homo sapiens hypothetical LOC643911 (LOC643911), mRNA.                                           |
| THOP1     | -3.03 | -1.62 | NM_003249.3    | Homo sapiens thimet oligopeptidase 1 (THOP1), mRNA.                                                         |
| TOM1L1    | -3.02 | -1.53 | NM_005486.1    | Homo sapiens target of myb1 (chicken)-like 1 (TOM1L1), mRNA.                                                |
| LMNB1     | -3.02 | -1.55 | NM_005573.2    | Homo sapiens lamin B1 (LMNB1), mRNA.                                                                        |
| ARL13B    | -3.02 | -1.53 | NM_144996.2    | Homo sapiens ADP-ribosylation factor-like 13B (ARL13B), 2, mRNA.                                            |
| RAVER2    | -3.02 | -1.64 | NM_018211.2    | Homo sapiens ribonucleoprotein, PTB-binding 2 (RAVER2), mRNA.                                               |
| ACTL8     | -3.02 | -1.52 | NM_030812.1    | Homo sapiens actin-like 8 (ACTL8), mRNA.                                                                    |
| LOC387820 | -3.02 | -1.69 | XR_019393.1    | PREDICTED: Homo sapiens similar to DnaJ (Hsp40) homolog, subfamily B, member 6 isoform a (LOC387820), mRNA. |
| C6orf150  | -3.02 | -1.55 | NM_138441.2    | Homo sapiens chromosome 6 open reading frame 150 (C6orf150), mRNA.                                          |
| SORD      | -3.01 | -1.51 | NM_003104.3    | Homo sapiens sorbitol dehydrogenase (SORD), mRNA.                                                           |
| SGOL1     | -3.01 | -1.57 | NM_138484.2    | Homo sapiens shugoshin-like 1 (S. pombe) (SGOL1), C2, mRNA.                                                 |
| R3HDM1    | -3.01 | -1.55 | NM_015361.2    | Homo sapiens R3H domain containing 1 (R3HDM1), mRNA.                                                        |
| CAMSAP1   | -3.01 | -1.58 | NM_015447.1    | Homo sapiens calmodulin regulated spectrin-associated protein 1 (CAMSAP1), mRNA.                            |
| VPS35     | -3    | -1.72 | NM_018206.3    | Homo sapiens vacuolar protein sorting 35 homolog (S. cerevisiae) (VPS35), mRNA.                             |
| COX10     | -3    | -1.63 | NM_001303.2    | Homo sapiens COX10 homolog, cytochrome c oxidase assembly protein, heme A: COX10                            |
| PSMC3IP   | -3    | -1.54 | NM_016556.1    | Homo sapiens PSMC3 interacting protein (PSMC3IP), 2, mRNA.                                                  |
| ZADH2     | -3    | -1.54 | NM_175907.3    | Homo sapiens zinc binding alcohol dehydrogenase, domain containing 2 (ZADH2), mRNA.                         |
| SLC25A15  | -2.99 | -1.59 | NM_014252.1    | Homo sapiens solute carrier family 25 (mitochondrial carrier; ornithine transporter) member 15 (SLC25A15    |

|           |       |       |                |                                                                                                                      |
|-----------|-------|-------|----------------|----------------------------------------------------------------------------------------------------------------------|
| MAFF      | -2.99 | -1.56 | NM_012323.2    | Homo sapiens v-maf musculoaponeurotic fibrosarcoma oncogene homolog F (avian) (MAFF)                                 |
| KNTC1     | -2.99 | -1.64 | NM_014708.3    | Homo sapiens kinetochore associated 1 (KNTC1), mRNA.                                                                 |
| FANCE     | -2.99 | -1.59 | NM_021922.2    | Homo sapiens Fanconi anemia, complementation group E (FANCE), mRNA.                                                  |
| C1orf163  | -2.99 | -1.6  | NM_023077.1    | Homo sapiens chromosome 1 open reading frame 163 (C1orf163), mRNA.                                                   |
| FECH      | -2.98 | -1.55 | NM_000140.2    | Homo sapiens ferrochelatase (protoporphyrin) (FECH), variant 2, mRNA.                                                |
| PPFIA1    | -2.98 | -1.54 | NM_177423.1    | Homo sapiens protein tyrosine phosphatase, receptor type, f polypeptide (PTPRF), PPFIA1                              |
| ALS2CR13  | -2.98 | -1.61 | NM_173511.2    | Homo sapiens amyotrophic lateral sclerosis 2 (juvenile) chromosome region, candidate 13 (ALS2CR13), mRNA.            |
| CCDC77    | -2.98 | -1.64 | NM_032358.2    | Homo sapiens coiled-coil domain containing 77 (CCDC77), mRNA.                                                        |
| SMAP2     | -2.97 | -1.61 | NM_022733.1    | Homo sapiens stromal membrane-associated GTPase-activating protein 2 (SMAP2), mRNA.                                  |
| ASNS      | -2.97 | -1.63 | NM_133436.1    | Homo sapiens asparagine synthetase (ASNS), 1, mRNA.                                                                  |
| POLQ      | -2.97 | -1.58 | NM_199420.3    | Homo sapiens polymerase (DNA directed), theta (POLQ), mRNA.                                                          |
| PPFIA1    | -2.97 | -1.54 | NM_177423.1    | Homo sapiens protein tyrosine phosphatase, receptor type, f polypeptide (PTPRF), interacting protein (liprin) PPFIA1 |
| PLK1      | -2.97 | -1.53 | NM_005030.3    | Homo sapiens polo-like kinase 1 (Drosophila) (PLK1), mRNA.                                                           |
| SNTB2     | -2.97 | -1.61 | NM_006750.2    | Homo sapiens syntrophin, beta 2 (dystrophin-associated protein A1, 59kDa, basic component 2)                         |
| TOMM70A   | -2.97 | -1.66 | NM_014820.3    | Homo sapiens translocase of outer mitochondrial membrane 70 homolog A (S. cerevisiae) (TOMM70A)                      |
| ACD       | -2.96 | -1.57 | NM_022914.2    | Homo sapiens adrenocortical dysplasia homolog (mouse) (ACD), 2, mRNA.                                                |
| NSBP1     | -2.96 | -1.57 | NM_030763.1    | Homo sapiens nucleosomal binding protein 1 (NSBP1), mRNA.                                                            |
| DNAJC9    | -2.96 | -1.66 | NM_015190.3    | Homo sapiens DnaJ (Hsp40) homolog, subfamily C, member 9 (DNAJC9), mRNA.                                             |
| MKRN2     | -2.96 | -1.64 | NM_014160.3    | Homo sapiens makorin, ring finger protein, 2 (MKRN2), mRNA.                                                          |
| LCOR      | -2.95 | -1.54 | NM_032440.2    | Homo sapiens ligand dependent nuclear receptor corepressor (LCOR), mRNA.                                             |
| PRTFDC1   | -2.95 | -1.53 | NM_020200.5    | Homo sapiens phosphoribosyl transferase domain containing 1 (PRTFDC1), mRNA.                                         |
| LOC149448 | -2.95 | -1.56 | XM_939682.1    | PREDICTED: Homo sapiens hypothetical protein LOC149448 (LOC149448), mRNA.                                            |
| LOC653119 | -2.95 | -1.54 | XM_926110.1    | PREDICTED: Homo sapiens similar to block of proliferation 1 (LOC653119), mRNA.                                       |
| CDT1      | -2.94 | -1.59 | NM_030928.2    | Homo sapiens chromatin licensing and DNA replication factor 1 (CDT1), mRNA.                                          |
| LOC283932 | -2.94 | -1.54 | NM_175901.3    | Homo sapiens hypothetical protein LOC283932 (LOC283932), mRNA.                                                       |
| KIAA0564  | -2.93 | -1.56 | NM_001009814.1 | Homo sapiens KIAA0564 (KIAA0564), 2, mRNA.                                                                           |
| LOC653752 | -2.93 | -1.54 | XM_933660.1    | PREDICTED: Homo sapiens similar to dexamethasone-induced transcript (LOC653752), mRNA.                               |
| CYB5R4    | -2.92 | -1.51 | NM_016230.3    | Homo sapiens cytochrome b5 reductase 4 (CYB5R4), mRNA.                                                               |
| E2F7      | -2.92 | -1.56 | NM_203394.2    | Homo sapiens E2F transcription factor 7 (E2F7), mRNA.                                                                |
| FAHD1     | -2.92 | -1.62 | NM_031208.1    | Homo sapiens fumarylacetoacetate hydrolase domain containing 1 (FAHD1), 2, mRNA.                                     |
| CEP152    | -2.92 | -1.51 | NM_014985.2    | Homo sapiens centrosomal protein 152kDa (CEP152), mRNA.                                                              |
| ZNF232    | -2.91 | -1.56 | NM_014519.2    | Homo sapiens zinc finger protein 232 (ZNF232), mRNA.                                                                 |
| ACN9      | -2.91 | -1.56 | NM_020186.1    | Homo sapiens ACN9 homolog (S. cerevisiae) (ACN9), mRNA.                                                              |
| TMEM138   | -2.91 | -1.58 | NM_016464.3    | Homo sapiens transmembrane protein 138 (TMEM138), mRNA.                                                              |
| MXD3      | -2.9  | -1.52 | NM_031300.2    | Homo sapiens MAX dimerization protein 3 (MXD3), mRNA.                                                                |
| TTLL12    | -2.9  | -1.62 | NM_015140.2    | Homo sapiens tubulin tyrosine ligase-like family, member 12 (TTLL12), mRNA.                                          |
| SMC2      | -2.9  | -1.59 | NM_001042550.1 | Homo sapiens structural maintenance of chromosomes 2 (SMC2), 1, mRNA.                                                |
| SLC37A4   | -2.9  | -1.61 | NM_001467.4    | Homo sapiens solute carrier family 37 (glucose-6-phosphate transporter), member 4 (SLC37A4), mRNA.                   |
| RAD1      | -2.9  | -1.58 | NM_133377.2    | Homo sapiens RAD1 homolog (S. pombe) (RAD1), 3, mRNA.                                                                |
| LYAR      | -2.9  | -1.61 | NM_017816.1    | Homo sapiens Ly1 antibody reactive homolog (mouse) (LYAR), mRNA.                                                     |
| CYB5D1    | -2.9  | -1.61 | NM_144607.3    | Homo sapiens cytochrome b5 domain containing 1 (CYB5D1), mRNA.                                                       |
| HNRPUL1   | -2.9  | -1.59 | NM_144732.1    | Homo sapiens heterogeneous nuclear ribonucleoprotein U-like 1 (HNRPUL1), 4, mRNA.                                    |
| HHEX      | -2.89 | -1.53 | NM_002729.4    | Homo sapiens hematopoietically expressed homeobox (HHEX), mRNA.                                                      |
| IRX5      | -2.89 | -1.54 | NM_005853.4    | Homo sapiens iroquois homeobox protein 5 (IRX5), mRNA.                                                               |
| ZHX1      | -2.89 | -1.48 | NM_007222.3    | Homo sapiens zinc fingers and homeoboxes 1 (ZHX1), 2, mRNA.                                                          |
| SLC39A4   | -2.89 | -1.57 | NM_017767.1    | Homo sapiens solute carrier family 39 (zinc transporter), member 4 (SLC39A4), 1, mRNA.                               |
| RWDD4A    | -2.89 | -1.59 | NM_152682.2    | Homo sapiens RWD domain containing 4A (RWDD4A), mRNA.                                                                |
| WDR19     | -2.89 | -1.56 | NM_025132.3    | Homo sapiens WD repeat domain 19 (WDR19), mRNA.                                                                      |
| MRPL24    | -2.89 | -1.65 | NM_145729.1    | Homo sapiens mitochondrial ribosomal protein L24 (MRPL24),                                                           |

|           |       |       |                |                                                                                                              |
|-----------|-------|-------|----------------|--------------------------------------------------------------------------------------------------------------|
| NAT12     | -2.89 | -1.5  | NM_001011713.1 | Homo sapiens N-acetyltransferase 12 (NAT12), mRNA.                                                           |
| VPS24     | -2.88 | -1.54 | NM_001005753.1 | Homo sapiens vacuolar protein sorting 24 homolog (S. cerevisiae) (VPS24), 2, mRNA.                           |
| NARG1L    | -2.88 | -1.56 | NM_024561.3    | Homo sapiens NMDA receptor regulated 1-like (NARG1L), 1, mRNA.                                               |
| RRM1      | -2.88 | -1.72 | NM_001033.2    | Homo sapiens ribonucleotide reductase M1 polypeptide (RRM1), mRNA.                                           |
| CCNE2     | -2.88 | -1.57 | NM_057735.1    | Homo sapiens cyclin E2 (CCNE2), 2, mRNA.                                                                     |
| CCDC34    | -2.88 | -1.65 | NM_030771.1    | Homo sapiens coiled-coil domain containing 34 (CCDC34), 1, mRNA.                                             |
| CENPO     | -2.88 | -1.51 | NM_024322.1    | Homo sapiens centromere protein O (CENPO), mRNA.                                                             |
| C7orf24   | -2.88 | -1.57 | NM_024051.2    | Homo sapiens chromosome 7 open reading frame 24 (C7orf24), mRNA.                                             |
| C17orf58  | -2.88 | -1.6  | NM_181656.1    | Homo sapiens chromosome 17 open reading frame 58 (C17orf58), 2, mRNA.                                        |
| LOC653226 | -2.88 | -1.7  | XM_927451.2    | PREDICTED: Homo sapiens similar to Signal recognition particle 9 kDa protein (SRP9) (LOC653226), mRNA.       |
| PIK3CA    | -2.87 | -1.51 | NM_006218.2    | Homo sapiens phosphoinositide-3-kinase, catalytic, alpha polypeptide (PIK3CA), mRNA.                         |
| BRCA1     | -2.87 | -1.55 | NM_007304.2    | Homo sapiens breast cancer 1, early onset (BRCA1), BRCA1-delta11b, mRNA.                                     |
| CENPJ     | -2.87 | -1.54 | NM_018451.3    | Homo sapiens centromere protein J (CENPJ), mRNA.                                                             |
| KIAA1524  | -2.87 | -1.51 | NM_020890.1    | Homo sapiens KIAA1524 (KIAA1524), mRNA.                                                                      |
| SPAG5     | -2.86 | -1.52 | NM_006461.3    | Homo sapiens sperm associated antigen 5 (SPAG5), mRNA.                                                       |
| C12orf29  | -2.86 | -1.59 | NM_001009894.2 | Homo sapiens chromosome 12 open reading frame 29 (C12orf29), mRNA.                                           |
| LOC731049 | -2.86 | -1.62 | XM_001129232.1 | PREDICTED: Homo sapiens similar to Ubiquitin-conjugating enzyme E2S (Ubiquitin-conjugating enzyme E2-24 kDa) |
| C15orf42  | -2.86 | -1.53 | NM_152259.3    | Homo sapiens chromosome 15 open reading frame 42 (C15orf42), mRNA.                                           |
| RPS6KA5   | -2.85 | -1.51 | NM_004755.2    | Homo sapiens ribosomal protein S6 kinase, 90kDa, polypeptide 5 (RPS6KA5), 1, mRNA.                           |
| DDEF2     | -2.85 | -1.55 | NM_003887.1    | Homo sapiens development and differentiation enhancing factor 2 (DDEF2), mRNA.                               |
| YWHAG     | -2.85 | -1.55 | NM_012479.2    | Homo sapiens tyrosine 3-monooxygenase/tryptophan 5-monooxygenase activation protein, gamma polypeptide       |
| MATK      | -2.85 | -1.6  | NM_139354.2    | Homo sapiens megakaryocyte-associated tyrosine kinase (MATK), 3, mRNA.                                       |
| MANEA     | -2.85 | -1.49 | NM_024641.2    | Homo sapiens mannosidase, endo-alpha (MANEA), mRNA.                                                          |
| EIF1AX    | -2.84 | -1.56 | NM_001412.3    | Homo sapiens eukaryotic translation initiation factor 1A, X-linked (EIF1AX), mRNA.                           |
| ALDH3A2   | -2.84 | -1.49 | NM_001031806.1 | Homo sapiens aldehyde dehydrogenase 3 family, member A2 (ALDH3A2), 1, mRNA.                                  |
| SPRYD3    | -2.84 | -1.53 | NM_032840.1    | Homo sapiens SPRY domain containing 3 (SPRYD3), mRNA.                                                        |
| FAM131C   | -2.84 | -1.5  | NM_182623.1    | Homo sapiens family with sequence similarity 131, member C (FAM131C), mRNA.                                  |
| SCARA3    | -2.83 | -1.51 | NM_182826.1    | Homo sapiens scavenger receptor class A, member 3 (SCARA3), 2, mRNA.                                         |
| NBPF20    | -2.83 | -1.53 | NM_001037675.1 | Homo sapiens neuroblastoma breakpoint family, member 20 (NBPF20), mRNA.                                      |
| CCDC32    | -2.83 | -1.53 | NM_052849.2    | Homo sapiens coiled-coil domain containing 32 (CCDC32), 2, mRNA.                                             |
| CALML4    | -2.82 | -1.53 | NM_001031733.1 | Homo sapiens calmodulin-like 4 (CALML4), 1, mRNA.                                                            |
| UBA6      | -2.81 | -1.56 | NM_018227.5    | Homo sapiens ubiquitin-like modifier activating enzyme 6 (UBA6), mRNA.                                       |
| SYNCRIP   | -2.81 | -1.61 | NM_006372.3    | Homo sapiens synaptotagmin binding, cytoplasmic RNA interacting protein (SYNCRIP), mRNA.                     |
| ARHGEF10  | -2.81 | -1.54 | NM_014629.2    | Homo sapiens Rho guanine nucleotide exchange factor (GEF) 10 (ARHGEF10), mRNA.                               |
| ORAI1     | -2.81 | -1.54 | NM_032790.2    | Homo sapiens ORAI calcium release-activated calcium modulator 1 (ORAI1), mRNA.                               |
| ALDH3A2   | -2.81 | -1.61 | NM_000382.2    | Homo sapiens aldehyde dehydrogenase 3 family, member A2 (ALDH3A2), 2, mRNA.                                  |
| PREPL     | -2.81 | -1.54 | NM_006036.2    | Homo sapiens prolyl endopeptidase-like (PREPL), mRNA.                                                        |
| LOC653226 | -2.81 | -1.6  | XM_927451.2    | PREDICTED: Homo sapiens similar to Signal recognition particle 9 kDa protein (SRP9) (LOC653226), mRNA.       |
| ZWILCH    | -2.81 | -1.64 | NR_003105.1    | Homo sapiens Zwilch, kinetochore associated, homolog (Drosophila) (ZWILCH), 2, transcribed RNA.              |
| CDCA4     | -2.81 | -1.5  | NM_017955.2    | Homo sapiens cell division cycle associated 4 (CDCA4), 13, mRNA.                                             |
| PPP2CA    | -2.8  | -1.58 | NM_002715.2    | Homo sapiens protein phosphatase 2 (formerly 2A), catalytic subunit, alpha isoform (PPP2CA), mRNA.           |
| STMN1     | -2.8  | -1.58 | NM_203401.1    | Homo sapiens stathmin 1/oncoprotein 18 (STMN1), 1, mRNA.                                                     |
| NMI       | -2.8  | -1.56 | NM_004688.1    | Homo sapiens N-myc (and STAT) interactor (NMI), mRNA.                                                        |
| FIGNL1    | -2.8  | -1.52 | NM_001042762.1 | Homo sapiens fidgetin-like 1 (FIGNL1), 1, mRNA.                                                              |
| PSIP1     | -2.79 | -1.58 | NM_033222.2    | Homo sapiens PC4 and SFRS1 interacting protein 1 (PSIP1), 2, mRNA.                                           |
| TGFBR2    | -2.79 | -1.58 | NM_001024847.1 | Homo sapiens transforming growth factor, beta receptor II (70/80kDa) (TGFBR2), 1, mRNA.                      |
| SGOL2     | -2.79 | -1.51 | NM_152524.3    | Homo sapiens shugoshin-like 2 (S. pombe) (SGOL2), mRNA.                                                      |
| FAM131A   | -2.79 | -1.5  | NM_144635.3    | Homo sapiens family with sequence similarity 131, member A (FAM131A), mRNA.                                  |
|           | -2.79 | -1.49 | BI254341       | 602976638F1 NIH_MGC_12 Homo sapiens cDNA clone IMAGE:5115800 5, mRNA sequence                                |

|           |       |                      |                                                                                                           |
|-----------|-------|----------------------|-----------------------------------------------------------------------------------------------------------|
| CCDC132   | -2.78 | -1.52 NM_017667.2    | Homo sapiens coiled-coil domain containing 132 (CCDC132), 1, mRNA.                                        |
| UNG       | -2.78 | -1.56 NM_003362.2    | Homo sapiens uracil-DNA glycosylase (UNG), 1, mRNA.                                                       |
| SPIN4     | -2.78 | -1.54 NM_001012968.2 | Homo sapiens spindlin family, member 4 (SPIN4), mRNA.                                                     |
| CSRP2     | -2.78 | -1.53 NM_001321.1    | Homo sapiens cysteine and glycine-rich protein 2 (CSRP2), mRNA.                                           |
| SLMO1     | -2.78 | -1.47 NM_006553.2    | Homo sapiens slowmo homolog 1 (Drosophila) (SLMO1), mRNA.                                                 |
| FBXO5     | -2.77 | -1.52 NM_012177.2    | Homo sapiens F-box protein 5 (FBXO5), mRNA.                                                               |
| MELK      | -2.77 | -1.6 NM_014791.2     | Homo sapiens maternal embryonic leucine zipper kinase (MELK), mRNA.                                       |
| INCENP    | -2.77 | -1.54 NM_001040694.1 | Homo sapiens inner centromere protein antigens 135/155kDa (INCENP), 1, mRNA.                              |
| C12orf32  | -2.77 | -1.52 NM_031465.2    | Homo sapiens chromosome 12 open reading frame 32 (C12orf32), mRNA.                                        |
| LYAR      | -2.77 | -1.59 NM_017816.1    | Homo sapiens Ly1 antibody reactive homolog (mouse) (LYAR), mRNA.                                          |
| LOC650369 | -2.77 | -1.65 XR_018848.1    | PREDICTED: Homo sapiens similar to family with sequence similarity 60, member A (LOC650369), mRNA.        |
| BRP44L    | -2.77 | -1.52 NM_016098.1    | Homo sapiens brain protein 44-like (BRP44L), mRNA.                                                        |
| XK        | -2.76 | -1.46 NM_021083.2    | Homo sapiens X-linked Kx blood group (McLeod syndrome) (XK), mRNA.                                        |
| ARHGAP18  | -2.76 | -1.48 NM_033515.2    | Homo sapiens Rho GTPase activating protein 18 (ARHGAP18), mRNA.                                           |
| CXCL16    | -2.76 | -1.47 NM_022059.1    | Homo sapiens chemokine (C-X-C motif) ligand 16 (CXCL16), mRNA.                                            |
| ACN9      | -2.76 | -1.55 NM_020186.1    | Homo sapiens ACN9 homolog (S. cerevisiae) (ACN9), mRNA.                                                   |
| MCM6      | -2.76 | -1.68 NM_005915.4    | Homo sapiens minichromosome maintenance complex component 6 (MCM6), mRNA.                                 |
| PSMG1     | -2.76 | -1.66 NM_203433.1    | Homo sapiens proteasome (prosome, macropain) assembly chaperone 1 (PSMG1), 2, mRNA.                       |
| CENPQ     | -2.76 | -1.53 NM_018132.3    | Homo sapiens centromere protein Q (CENPQ), mRNA.                                                          |
| USP37     | -2.75 | -1.47 NM_020935.1    | Homo sapiens ubiquitin specific peptidase 37 (USP37), mRNA.                                               |
| RFC1      | -2.75 | -1.57 NM_002913.3    | Homo sapiens replication factor C (activator 1) 1, 145kDa (RFC1), mRNA.                                   |
| SOHLH2    | -2.74 | -1.54 NM_017826.1    | Homo sapiens spermatogenesis and oogenesis specific basic helix-loop-helix 2 (SOHLH2), mRNA.              |
| TMEM48    | -2.74 | -1.54 NM_018087.3    | Homo sapiens transmembrane protein 48 (TMEM48), mRNA.                                                     |
| TTL       | -2.74 | -1.55 NM_153712.4    | Homo sapiens tubulin tyrosine ligase (TTL), mRNA.                                                         |
| KCTD3     | -2.74 | -1.62 NM_016121.3    | Homo sapiens potassium channel tetramerisation domain containing 3 (KCTD3), mRNA.                         |
| ATP2C1    | -2.74 | -1.49 NM_014382.2    | Homo sapiens ATPase, Ca <sup>++</sup> transporting, type 2C, member 1 (ATP2C1), 1, mRNA.                  |
| FANCB     | -2.74 | -1.49 NM_001018113.1 | Homo sapiens Fanconi anemia, complementation group B (FANCB), 1, mRNA.                                    |
| AKAP1     | -2.74 | -1.51 NM_003488.3    | Homo sapiens A kinase (PRKA) anchor protein 1 (AKAP1), mRNA.                                              |
| ZNF831    | -2.74 | -1.58 NM_178457.1    | Homo sapiens zinc finger protein 831 (ZNF831), mRNA.                                                      |
| SLC25A15  | -2.73 | -1.49 NM_014252.2    | Homo sapiens solute carrier family 25 (mitochondrial carrier; ornithine transporter) member 15 (SLC25A15) |
| GAS2L3    | -2.73 | -1.48 NM_174942.1    | Homo sapiens growth arrest-specific 2 like 3 (GAS2L3), mRNA.                                              |
| ENOPH1    | -2.72 | -1.61 NM_021204.2    | Homo sapiens enolase-phosphatase 1 (ENOPH1), mRNA.                                                        |
| ALKBH2    | -2.72 | -1.51 NM_001001655.1 | Homo sapiens alkB, alkylation repair homolog 2 (E. coli) (ALKBH2), mRNA.                                  |
| CCDC109B  | -2.72 | -1.58 NM_017918.3    | Homo sapiens coiled-coil domain containing 109B (CCDC109B), mRNA.                                         |
| UBQLN4    | -2.7  | -1.61 NM_020131.3    | Homo sapiens ubiquilin 4 (UBQLN4), mRNA.                                                                  |
| FANCB     | -2.7  | -1.48 NM_152633.2    | Homo sapiens Fanconi anemia, complementation group B (FANCB), 2, mRNA.                                    |
| SPRY1     | -2.7  | -1.49 NM_005841.1    | Homo sapiens sprouty homolog 1, antagonist of FGF signaling (Drosophila) (SPRY1), 1, mRNA.                |
| LRRC58    | -2.7  | -1.5 XM_938862.2     | PREDICTED: Homo sapiens leucine rich repeat containing 58 (LRRC58), mRNA.                                 |
| CALM1     | -2.7  | -1.58 NM_006888.3    | Homo sapiens calmodulin 1 (phosphorylase kinase, delta) (CALM1), mRNA.                                    |
| FEM1C     | -2.7  | -1.51 NM_020177.2    | Homo sapiens fem-1 homolog c (C. elegans) (FEM1C), mRNA.                                                  |
| STX6      | -2.69 | -1.49 NM_005819.4    | Homo sapiens syntaxin 6 (STX6), mRNA.                                                                     |
| SLC4A7    | -2.69 | -1.52 NM_003615.2    | Homo sapiens solute carrier family 4, sodium bicarbonate cotransporter, member 7 (SLC4A7), mRNA.          |
| ABCB1     | -2.69 | -1.49 NM_000927.3    | Homo sapiens ATP-binding cassette, sub-family B (MDR/TAP), member 1 (ABCB1), mRNA.                        |
| UNC84B    | -2.69 | -1.58 NM_015374.1    | Homo sapiens unc-84 homolog B (C. elegans) (UNC84B), mRNA.                                                |
| FANCA     | -2.69 | -1.46 NM_001018112.1 | Homo sapiens Fanconi anemia, complementation group A (FANCA), 2, mRNA.                                    |
|           | -2.69 | -1.52 AK023178       | Homo sapiens cDNA FLJ13116 fis, clone NT2RP3002659                                                        |
| SORD      | -2.69 | -1.44 XM_001132175.1 | PREDICTED: Homo sapiens sorbitol dehydrogenase (SORD), mRNA.                                              |
| NOC3L     | -2.69 | -1.59 NM_022451.9    | Homo sapiens nucleolar complex associated 3 homolog (S. cerevisiae) (NOC3L), mRNA.                        |
| COQ3      | -2.68 | -1.55 NM_017421.3    | Homo sapiens coenzyme Q3 homolog, methyltransferase (S. cerevisiae) (COQ3), mRNA.                         |

|           |       |                      |                                                                                                              |
|-----------|-------|----------------------|--------------------------------------------------------------------------------------------------------------|
| MSRB3     | -2.68 | -1.46 NM_198080.2    | Homo sapiens methionine sulfoxide reductase B3 (MSRB3), 1, mRNA.                                             |
| LOC653820 | -2.68 | -1.49 XM_930579.2    | PREDICTED: Homo sapiens similar to family with sequence similarity 72, member A, 1                           |
| C14orf169 | -2.68 | -1.5 NM_024644.2     | Homo sapiens chromosome 14 open reading frame 169 (C14orf169), mRNA.                                         |
| GATAD2B   | -2.67 | -1.55 NM_020699.1    | Homo sapiens GATA zinc finger domain containing 2B (GATAD2B), mRNA.                                          |
| AK2       | -2.67 | -1.52 NM_013411.3    | Homo sapiens adenylate kinase 2 (AK2), AK2B, mRNA.                                                           |
| ATP6V1C1  | -2.67 | -1.5 NM_001695.4     | Homo sapiens ATPase, H <sup>+</sup> transporting, lysosomal 42kDa, V1 subunit C1 (ATP6V1C1), mRNA.           |
| RASSF1    | -2.67 | -1.5 NM_170712.1     | Homo sapiens Ras association (RalGDS/AF-6) domain family 1 (RASSF1), B, mRNA.                                |
| C2orf33   | -2.67 | -1.49 NM_020194.4    | Homo sapiens chromosome 2 open reading frame 33 (C2orf33), mRNA.                                             |
| IQCC      | -2.67 | -1.48 NM_018134.1    | Homo sapiens IQ motif containing C (IQCC), mRNA.                                                             |
| DOCK11    | -2.67 | -1.51 NM_144658.3    | Homo sapiens dedicator of cytokinesis 11 (DOCK11), mRNA.                                                     |
| ZIC2      | -2.66 | -1.56 NM_007129.2    | Homo sapiens Zic family member 2 (odd-paired homolog, Drosophila) (ZIC2), mRNA.                              |
| KCNIP3    | -2.66 | -1.51 NM_013434.4    | Homo sapiens Kv channel interacting protein 3, calsenilin (KCNIP3), 1, mRNA.                                 |
| CSPP1     | -2.66 | -1.53 NM_024790.5    | Homo sapiens centrosome and spindle pole associated protein 1 (CSPP1), 2, mRNA.                              |
| HIST1H4C  | -2.66 | -1.73 NM_003542.3    | Homo sapiens histone cluster 1, H4c (HIST1H4C), mRNA.                                                        |
| LOC728014 | -2.66 | -1.51 XM_001127981.1 | PREDICTED: Homo sapiens similar to huntingtin interacting protein 1 related (LOC728014), mRNA.               |
| SMYD2     | -2.66 | -1.54 NM_020197.1    | Homo sapiens SET and MYND domain containing 2 (SMYD2), mRNA.                                                 |
| ZBTB8     | -2.65 | -1.48 NM_001040441.1 | Homo sapiens zinc finger and BTB domain containing 8 (ZBTB8), mRNA. XM_945039                                |
| TMPRSS3   | -2.65 | -1.5 NM_032405.1     | Homo sapiens transmembrane protease, serine 3 (TMPRSS3), D, mRNA.                                            |
| MRPL1     | -2.65 | -1.53 NM_020236.2    | Homo sapiens mitochondrial ribosomal protein L1 (MRPL1), mRNA.                                               |
| EPDR1     | -2.65 | -1.53 NM_017549.3    | Homo sapiens ependymin related protein 1 (zebrafish) (EPDR1), mRNA.                                          |
| SNHG4     | -2.65 | -1.45 NR_003141.1    | Homo sapiens small nucleolar RNA host gene (non-protein coding) 4 (SNHG4) on chromosome 5.                   |
| C1orf112  | -2.65 | -1.5 NM_018186.2     | Homo sapiens chromosome 1 open reading frame 112 (C1orf112), mRNA.                                           |
| SRI       | -2.64 | -1.48 NM_198901.1    | Homo sapiens sorcin (SRI), 2, mRNA.                                                                          |
| ZFP91     | -2.64 | -1.59 NM_053023.3    | Homo sapiens zinc finger protein 91 homolog (mouse) (ZFP91), mRNA.                                           |
| IMPDH2    | -2.64 | -1.6 NM_000884.2     | Homo sapiens IMP (inosine monophosphate) dehydrogenase 2 (IMPDH2), mRNA.                                     |
| MELK      | -2.64 | -1.53 NM_014791.2    | Homo sapiens maternal embryonic leucine zipper kinase (MELK), mRNA.                                          |
|           | -2.64 | -1.53 BX537762       | Homo sapiens mRNA; cDNA DKFZp779F0411 (from clone DKFZp779F0411)                                             |
| C7orf41   | -2.64 | -1.47 NM_152793.2    | Homo sapiens chromosome 7 open reading frame 41 (C7orf41), mRNA.                                             |
| RMI1      | -2.64 | -1.52 NM_024945.1    | Homo sapiens RMI1, RecQ mediated genome instability 1, homolog (S. cerevisiae) (RMI1), mRNA.                 |
| BECN1     | -2.63 | -1.48 NM_003766.2    | Homo sapiens beclin 1, autophagy related (BECN1), mRNA.                                                      |
| PCGF6     | -2.62 | -1.46 NM_001011663.1 | Homo sapiens polycomb group ring finger 6 (PCGF6), 1, mRNA.                                                  |
| SNX5      | -2.62 | -1.5 NM_014426.2     | Homo sapiens sorting nexin 5 (SNX5), 2, mRNA.                                                                |
| KATNB1    | -2.62 | -1.49 NM_005886.2    | Homo sapiens katanin p80 (WD repeat containing) subunit B 1 (KATNB1), mRNA.                                  |
| CAMLG     | -2.62 | -1.61 NM_001745.2    | Homo sapiens calcium modulating ligand (CAMLG), mRNA.                                                        |
| KBTBD2    | -2.62 | -1.52 NM_015483.1    | Homo sapiens kelch repeat and BTB (POZ) domain containing 2 (KBTBD2), mRNA.                                  |
| C17orf68  | -2.62 | -1.46 XM_938283.2    | PREDICTED: Homo sapiens chromosome 17 open reading frame 68 (C17orf68), mRNA.                                |
| WDR51A    | -2.62 | -1.54 NM_015426.2    | Homo sapiens WD repeat domain 51A (WDR51A), mRNA.                                                            |
| MGC42630  | -2.62 | -1.46 NM_175923.3    | Homo sapiens hypothetical protein MGC42630 (MGC42630), mRNA.                                                 |
| IRX5      | -2.61 | -1.45 NM_005853.5    | Homo sapiens iroquois homeobox 5 (IRX5), mRNA.                                                               |
| PDZD8     | -2.61 | -1.48 NM_173791.3    | Homo sapiens PDZ domain containing 8 (PDZD8), mRNA.                                                          |
| WDR20     | -2.61 | -1.47 NM_181291.1    | Homo sapiens WD repeat domain 20 (WDR20), 1, mRNA.                                                           |
| C17orf41  | -2.61 | -1.44 XM_001134002.1 | PREDICTED: Homo sapiens chromosome 17 open reading frame 41 (C17orf41), mRNA.                                |
| PTDSS1    | -2.6  | -1.57 NM_014754.1    | Homo sapiens phosphatidylserine synthase 1 (PTDSS1), mRNA.                                                   |
| SASH1     | -2.6  | -1.46 NM_015278.3    | Homo sapiens SAM and SH3 domain containing 1 (SASH1), mRNA.                                                  |
| NRM       | -2.6  | -1.43 NM_007243.1    | Homo sapiens nurim (nuclear envelope membrane protein) (NRM), mRNA.                                          |
| MRPL42    | -2.6  | -1.57 NM_172177.1    | Homo sapiens mitochondrial ribosomal protein L42 (MRPL42),                                                   |
| LOC651816 | -2.6  | -1.54 XM_941060.1    | PREDICTED: Homo sapiens similar to Ubiquitin-conjugating enzyme E2S (Ubiquitin-conjugating enzyme E2-24 kDa) |
| SLC2A1    | -2.59 | -1.61 NM_006516.1    | Homo sapiens solute carrier family 2 (facilitated glucose transporter), member 1 (SLC2A1), mRNA.             |
| LOC727761 | -2.58 | -1.54 XM_001126211.1 | PREDICTED: Homo sapiens similar to Deoxythymidylate kinase (thymidylate kinase)                              |

|           |       |       |                |                                                                                                            |
|-----------|-------|-------|----------------|------------------------------------------------------------------------------------------------------------|
| NOL3      | -2.57 | -1.43 | NM_003946.3    | Homo sapiens nucleolar protein 3 (apoptosis repressor with CARD domain) (NOL3), mRNA.                      |
| RIF1      | -2.57 | -1.49 | NM_018151.3    | Homo sapiens RAP1 interacting factor homolog (yeast) (RIF1), mRNA.                                         |
| PSME1     | -2.57 | -1.57 | NM_006263.2    | Homo sapiens proteasome (prosome, macropain) activator subunit 1 (PA28 alpha) (PSME1), 1, mRNA.            |
| CEP57     | -2.57 | -1.45 | NM_014679.3    | Homo sapiens centrosomal protein 57kDa (CEP57), mRNA.                                                      |
| R3HDM1    | -2.57 | -1.45 | NM_015361.2    | Homo sapiens R3H domain containing 1 (R3HDM1), mRNA.                                                       |
| DHPS      | -2.56 | -1.5  | NM_001930.2    | Homo sapiens deoxyhypusine synthase (DHPS), 1, mRNA.                                                       |
| PDIK1L    | -2.56 | -1.45 | NM_152835.2    | Homo sapiens PDLIM1 interacting kinase 1 like (PDIK1L), mRNA.                                              |
| AP3M2     | -2.56 | -1.44 | NM_006803.2    | Homo sapiens adaptor-related protein complex 3, mu 2 subunit (AP3M2), mRNA.                                |
| KLHL23    | -2.56 | -1.42 | NM_144711.3    | Homo sapiens kelch-like 23 (Drosophila) (KLHL23), mRNA.                                                    |
| LOC90835  | -2.56 | -1.45 | NM_001014979.1 | Homo sapiens hypothetical protein LOC90835 (LOC90835), mRNA.                                               |
| C10orf32  | -2.56 | -1.46 | NM_144591.1    | Homo sapiens chromosome 10 open reading frame 32 (C10orf32), mRNA.                                         |
| KRI1      | -2.56 | -1.43 | NM_023008.3    | Homo sapiens KRI1 homolog (S. cerevisiae) (KRI1), mRNA.                                                    |
| LOC652726 | -2.56 | -1.43 | XM_942351.2    | PREDICTED: Homo sapiens similar to ankyrin repeat domain 36 (LOC652726), mRNA.                             |
| AKAP11    | -2.55 | -1.48 | NM_016248.2    | Homo sapiens A kinase (PRKA) anchor protein 11 (AKAP11), mRNA.                                             |
| GRPEL1    | -2.55 | -1.53 | NM_025196.2    | Homo sapiens GrpE-like 1, mitochondrial (E. coli) (GRPEL1), mRNA.                                          |
| CAD       | -2.55 | -1.48 | NM_004341.3    | Homo sapiens carbamoyl-phosphate synthetase 2, aspartate transcarbamylase, and dihydroorotase (CAD), mRNA. |
| LOC649169 | -2.55 | -1.43 | XM_939742.2    | PREDICTED: Homo sapiens similar to WD repeat domain 74, 1 (LOC649169), mRNA.                               |
|           | -2.55 | -1.44 | AL133627       | Homo sapiens mRNA; cDNA DKFZp434K0722 (from clone DKFZp434K0722)                                           |
| GEMIN4    | -2.54 | -1.58 | NM_015721.2    | Homo sapiens gem (nuclear organelle) associated protein 4 (GEMIN4), mRNA.                                  |
| NXT1      | -2.54 | -1.52 | NM_013248.2    | Homo sapiens NTF2-like export factor 1 (NXT1), mRNA.                                                       |
| TRIM61    | -2.54 | -1.41 | NM_001012414.1 | Homo sapiens tripartite motif-containing 61 (TRIM61), mRNA.                                                |
| DYNC1LI2  | -2.54 | -1.54 | NM_006141.2    | Homo sapiens dynein, cytoplasmic 1, light intermediate chain 2 (DYNC1LI2), mRNA.                           |
| WDR12     | -2.54 | -1.53 | NM_018256.2    | Homo sapiens WD repeat domain 12 (WDR12), mRNA.                                                            |
| RNF216    | -2.53 | -1.5  | NM_207111.2    | Homo sapiens ring finger protein 216 (RNF216), 1, mRNA.                                                    |
| ETNK1     | -2.53 | -1.47 | NM_018638.4    | Homo sapiens ethanolamine kinase 1 (ETNK1), 1, mRNA.                                                       |
| CDC25A    | -2.53 | -1.42 | NM_001789.2    | Homo sapiens cell division cycle 25 homolog A (S. pombe) (CDC25A), 1, mRNA.                                |
| ATXN7L2   | -2.53 | -1.43 | NM_153340.3    | Homo sapiens ataxin 7-like 2 (ATXN7L2), mRNA.                                                              |
| ATAD3A    | -2.53 | -1.48 | NM_018188.2    | Homo sapiens ATPase family, AAA domain containing 3A (ATAD3A), mRNA.                                       |
| PFAAP5    | -2.53 | -1.45 | NM_014887.1    | Homo sapiens phosphonoformate immuno-associated protein 5 (PFAAP5), mRNA.                                  |
| C16orf53  | -2.53 | -1.51 | NM_024516.2    | Homo sapiens chromosome 16 open reading frame 53 (C16orf53), mRNA.                                         |
| ARL4A     | -2.52 | -1.45 | NM_001037164.1 | Homo sapiens ADP-ribosylation factor-like 4A (ARL4A), 3, mRNA.                                             |
| NUP62     | -2.52 | -1.58 | NM_016553.3    | Homo sapiens nucleoporin 62kDa (NUP62), 2, mRNA.                                                           |
| ACYP1     | -2.52 | -1.42 | NM_001107.3    | Homo sapiens acylphosphatase 1, erythrocyte (common) type (ACYP1), 1, mRNA.                                |
| EZH2      | -2.52 | -1.47 | NM_152998.1    | Homo sapiens enhancer of zeste homolog 2 (Drosophila) (EZH2), 2, mRNA.                                     |
| UNC5A     | -2.52 | -1.44 | NM_133369.2    | Homo sapiens unc-5 homolog A (C. elegans) (UNC5A), mRNA.                                                   |
| NOL5A     | -2.51 | -1.58 | NM_006392.2    | Homo sapiens nucleolar protein 5A (56kDa with KKE/D repeat) (NOL5A), mRNA.                                 |
| KCTD9     | -2.51 | -1.45 | NM_017634.2    | Homo sapiens potassium channel tetramerisation domain containing 9 (KCTD9), mRNA.                          |
| CDCA5     | -2.51 | -1.55 | NM_080668.2    | Homo sapiens cell division cycle associated 5 (CDCA5), mRNA.                                               |
| ZNF313    | -2.51 | -1.56 | NM_018683.3    | Homo sapiens zinc finger protein 313 (ZNF313), mRNA.                                                       |
| LOC284023 | -2.51 | -1.43 | XM_941810.2    | PREDICTED: Homo sapiens hypothetical protein LOC284023, 3 (LOC284023), mRNA.                               |
| SLC25A12  | -2.5  | -1.44 | NM_003705.2    | Homo sapiens solute carrier family 25 (mitochondrial carrier, Aralar), member 12 (SLC25A12)                |
| RCOR3     | -2.5  | -1.47 | NM_018254.2    | Homo sapiens REST corepressor 3 (RCOR3), mRNA.                                                             |
| MLKL      | -2.5  | -1.53 | NM_152649.1    | Homo sapiens mixed lineage kinase domain-like (MLKL), mRNA.                                                |
| SLC22A5   | -2.5  | -1.46 | NM_003060.2    | Homo sapiens solute carrier family 22 (organic cation transporter), member 5 (SLC22A5), mRNA.              |
| HECA      | -2.5  | -1.44 | NM_016217.2    | Homo sapiens headcase homolog (Drosophila) (HECA), mRNA.                                                   |
| AKTIP     | -2.49 | -1.47 | NM_001012398.1 | Homo sapiens AKT interacting protein (AKTIP), 1, mRNA.                                                     |
| SH3RF2    | -2.49 | -1.42 | NM_152550.2    | Homo sapiens SH3 domain containing ring finger 2 (SH3RF2), mRNA.                                           |
| MKX       | -2.49 | -1.47 | NM_173576.1    | Homo sapiens mohawk homeobox (MKX), mRNA.                                                                  |
| ANKRD12   | -2.49 | -1.42 | NM_015208.3    | Homo sapiens ankyrin repeat domain 12 (ANKRD12), 1, mRNA.                                                  |

|           |       |       |                |                                                                                                             |
|-----------|-------|-------|----------------|-------------------------------------------------------------------------------------------------------------|
| RMI1      | -2.49 | -1.48 | NM_024945.2    | Homo sapiens RMI1, RecQ mediated genome instability 1, homolog (S. cerevisiae) (RMI1), mRNA.                |
| KIAA0586  | -2.49 | -1.45 | NM_014749.2    | Homo sapiens KIAA0586 (KIAA0586), mRNA.                                                                     |
| TAF5      | -2.48 | -1.44 | NM_006951.3    | Homo sapiens TAF5 RNA polymerase II, TATA box binding protein (TBP)-associated factor, 100kDa (TAF5), mRNA. |
| ARHGEF19  | -2.48 | -1.45 | NM_153213.3    | Homo sapiens Rho guanine nucleotide exchange factor (GEF) 19 (ARHGEF19), mRNA.                              |
| PECI      | -2.48 | -1.57 | NM_006117.2    | Homo sapiens peroxisomal D3,D2-enoyl-CoA isomerase (PECI), 1, mRNA.                                         |
| CD58      | -2.48 | -1.51 | NM_001779.1    | Homo sapiens CD58 molecule (CD58), mRNA.                                                                    |
| C19orf48  | -2.48 | -1.52 | NM_199250.1    | Homo sapiens chromosome 19 open reading frame 48 (C19orf48), mRNA.                                          |
| 5-Mar     | -2.48 | -1.43 | NM_017824.4    | Homo sapiens membrane-associated ring finger (C3HC4) 5 (MARCH5), mRNA.                                      |
| FAM135A   | -2.48 | -1.44 | NM_020819.2    | Homo sapiens family with sequence similarity 135, member A (FAM135A), mRNA.                                 |
| SMC2      | -2.47 | -1.45 | NM_001042550.1 | Homo sapiens structural maintenance of chromosomes 2 (SMC2), 1, mRNA.                                       |
| MGC4172   | -2.47 | -1.48 | NM_024308.3    | Homo sapiens short-chain dehydrogenase/reductase (MGC4172), mRNA.                                           |
| LOC731007 | -2.47 | -1.41 | XM_001132080.1 | PREDICTED: Homo sapiens similar to Adenylate kinase isoenzyme 4, mitochondrial                              |
| NOL3      | -2.46 | -1.43 | NM_003946.3    | Homo sapiens nucleolar protein 3 (apoptosis repressor with CARD domain) (NOL3), mRNA.                       |
| BXDC2     | -2.46 | -1.58 | NM_018321.3    | Homo sapiens brix domain containing 2 (BXDC2), mRNA.                                                        |
| RPIA      | -2.46 | -1.47 | NM_144563.2    | Homo sapiens ribose 5-phosphate isomerase A (ribose 5-phosphate epimerase) (RPIA), mRNA.                    |
| COQ2      | -2.46 | -1.54 | NM_015697.6    | Homo sapiens coenzyme Q2 homolog, prenyltransferase (yeast) (COQ2), mRNA.                                   |
| LYRM4     | -2.46 | -1.45 | NM_020408.3    | Homo sapiens LYR motif containing 4 (LYRM4), mRNA.                                                          |
| TMEM118   | -2.46 | -1.45 | NM_032814.2    | Homo sapiens transmembrane protein 118 (TMEM118), mRNA.                                                     |
| DCUN1D4   | -2.46 | -1.48 | NM_015115.1    | Homo sapiens DCN1, defective in cullin neddylation 1, domain containing 4 (S. cerevisiae) (DCUN1D4), mRNA.  |
| MKRN1     | -2.46 | -1.55 | NM_013446.2    | Homo sapiens makorin, ring finger protein, 1 (MKRN1), mRNA.                                                 |
| SMARCC2   | -2.45 | -1.47 | NM_139067.1    | Homo sapiens SWI/SNF related, matrix associated, actin dependent regulator of chromatin                     |
| CENPM     | -2.45 | -1.44 | NM_001002876.1 | Homo sapiens centromere protein M (CENPM), 2, mRNA.                                                         |
| FAM86A    | -2.45 | -1.41 | NM_201598.1    | Homo sapiens family with sequence similarity 86, member A (FAM86A), 2, mRNA.                                |
| RAD54B    | -2.44 | -1.44 | NM_012415.2    | Homo sapiens RAD54 homolog B (S. cerevisiae) (RAD54B), mRNA.                                                |
| MLLT10    | -2.44 | -1.47 | NM_004641.2    | Homo sapiens myeloid/lymphoid or mixed-lineage leukemia (trithorax homolog, Drosophila)                     |
| PKMYT1    | -2.44 | -1.47 | NM_182687.1    | Homo sapiens protein kinase, membrane associated tyrosine/threonine 1 (PKMYT1), 2, mRNA.                    |
| CABLES1   | -2.44 | -1.44 | NM_138375.1    | Homo sapiens Cdk5 and Abl enzyme substrate 1 (CABLES1), 1, mRNA.                                            |
| USP1      | -2.44 | -1.57 | NM_001017416.1 | Homo sapiens ubiquitin specific peptidase 1 (USP1), 3, mRNA.                                                |
| UBE3A     | -2.43 | -1.5  | NM_000462.2    | Homo sapiens ubiquitin protein ligase E3A (human papilloma virus E6-associated protein, Angelman syndrome)  |
| UBE2C     | -2.43 | -1.55 | NM_181800.1    | Homo sapiens ubiquitin-conjugating enzyme E2C (UBE2C), 3, mRNA.                                             |
| KIAA1826  | -2.43 | -1.44 | NM_032424.1    | Homo sapiens KIAA1826 (KIAA1826), mRNA.                                                                     |
| IPO11     | -2.43 | -1.51 | NM_016338.3    | Homo sapiens importin 11 (IPO11), mRNA.                                                                     |
| CASC5     | -2.43 | -1.39 | NM_144508.3    | Homo sapiens cancer susceptibility candidate 5 (CASC5), 2, mRNA.                                            |
| KATNAL1   | -2.43 | -1.39 | NM_001014380.1 | Homo sapiens katanin p60 subunit A-like 1 (KATNAL1), 2, mRNA.                                               |
| GINS3     | -2.43 | -1.47 | NM_022770.2    | Homo sapiens GINS complex subunit 3 (Psf3 homolog) (GINS3), mRNA.                                           |
| FANCI     | -2.43 | -1.49 | NM_018193.2    | Homo sapiens Fanconi anemia, complementation group I (FANCI), 2, mRNA.                                      |
| SP3       | -2.42 | -1.47 | NM_001017371.3 | Homo sapiens Sp3 transcription factor (SP3), 2, mRNA.                                                       |
| PRKRIR    | -2.42 | -1.53 | NM_004705.2    | Homo sapiens protein-kinase, interferon-inducible double stranded RNA dependent inhibitor                   |
| SLC25A28  | -2.42 | -1.49 | NM_031212.3    | Homo sapiens solute carrier family 25, member 28 (SLC25A28), mRNA.                                          |
| ORC1L     | -2.42 | -1.43 | NM_004153.2    | Homo sapiens origin recognition complex, subunit 1-like (yeast) (ORC1L), mRNA.                              |
| CD47      | -2.42 | -1.4  | NM_198793.2    | Homo sapiens CD47 molecule (CD47), 2, mRNA.                                                                 |
| KIAA0240  | -2.42 | -1.45 | NM_015349.1    | Homo sapiens KIAA0240 (KIAA0240), mRNA.                                                                     |
| TACC3     | -2.42 | -1.46 | NM_006342.1    | Homo sapiens transforming, acidic coiled-coil containing protein 3 (TACC3), mRNA.                           |
| LOC647947 | -2.42 | -1.39 | XM_938447.1    | PREDICTED: Homo sapiens hypothetical protein LOC647947 (LOC647947), mRNA.                                   |
| ACTR6     | -2.42 | -1.48 | NM_022496.3    | Homo sapiens ARP6 actin-related protein 6 homolog (yeast) (ACTR6), mRNA.                                    |
| LOC653631 | -2.42 | -1.41 | XM_930476.2    | PREDICTED: Homo sapiens hypothetical LOC653631 (LOC653631), mRNA.                                           |
| PSMG1     | -2.42 | -1.55 | NM_003720.2    | Homo sapiens proteasome (prosome, macropain) assembly chaperone 1 (PSMG1), 1, mRNA.                         |
| PAPOLA    | -2.41 | -1.56 | NM_032632.3    | Homo sapiens poly(A) polymerase alpha (PAPOLA), mRNA.                                                       |
| STK17B    | -2.41 | -1.38 | NM_004226.2    | Homo sapiens serine/threonine kinase 17b (STK17B), mRNA.                                                    |

|           |       |                      |                                                                                                            |
|-----------|-------|----------------------|------------------------------------------------------------------------------------------------------------|
| INHBB     | -2.41 | -1.41 NM_002193.1    | Homo sapiens inhibin, beta B (activin AB beta polypeptide) (INHBB), mRNA.                                  |
| PAFAH1B3  | -2.41 | -1.5 NM_002573.2     | Homo sapiens platelet-activating factor acetylhydrolase, isoform Ib, gamma subunit 29kDa (PAFAH1B3), mRNA. |
| ATP6V1B2  | -2.41 | -1.52 NM_001693.3    | Homo sapiens ATPase, H+ transporting, lysosomal 56/58kDa, V1 subunit B2 (ATP6V1B2), mRNA.                  |
| GLS       | -2.41 | -1.4 NM_014905.2     | Homo sapiens glutaminase (GLS), mRNA.                                                                      |
| SSX2IP    | -2.41 | -1.42 NM_014021.2    | Homo sapiens synovial sarcoma, X breakpoint 2 interacting protein (SSX2IP), mRNA.                          |
| NY-SAR-48 | -2.41 | -1.41 NM_033417.1    | Homo sapiens sarcoma antigen NY-SAR-48 (NY-SAR-48), 1, mRNA.                                               |
|           | -2.41 | -1.43 BX393727       | BX393727 Homo sapiens NEUROBLASTOMA COT 25-NORMALIZED Homo sapiens cDNA clone                              |
| ZWILCH    | -2.41 | -1.44 NM_017975.3    | Homo sapiens Zwilch, kinetochore associated, homolog (Drosophila) (ZWILCH), 1, mRNA.                       |
| KLF11     | -2.41 | -1.47 XM_001129527.1 | PREDICTED: Homo sapiens Kruppel-like factor 11 (KLF11), mRNA.                                              |
| CRLF3     | -2.41 | -1.46 NM_015986.2    | Homo sapiens cytokine receptor-like factor 3 (CRLF3), mRNA.                                                |
| C14orf106 | -2.4  | -1.48 NM_018353.3    | Homo sapiens chromosome 14 open reading frame 106 (C14orf106), mRNA.                                       |
| PSAT1     | -2.4  | -1.52 NM_021154.3    | Homo sapiens phosphoserine aminotransferase 1 (PSAT1), 2, mRNA.                                            |
| OXR1      | -2.4  | -1.47 NM_181354.3    | Homo sapiens oxidation resistance 1 (OXR1), mRNA.                                                          |
| SASH1     | -2.4  | -1.39 NM_015278.3    | Homo sapiens SAM and SH3 domain containing 1 (SASH1), mRNA.                                                |
| FAM136A   | -2.4  | -1.53 NM_032822.1    | Homo sapiens family with sequence similarity 136, member A (FAM136A), mRNA.                                |
| UBE2J1    | -2.39 | -1.46 NM_016021.2    | Homo sapiens ubiquitin-conjugating enzyme E2, J1 (UBC6 homolog, yeast) (UBE2J1), mRNA.                     |
| UGT8      | -2.39 | -1.38 NM_003360.2    | Homo sapiens UDP glycosyltransferase 8 (UDP-galactose ceramide galactosyltransferase) (UGT8), mRNA.        |
| HIBCH     | -2.39 | -1.47 NM_198047.1    | Homo sapiens 3-hydroxyisobutyryl-Coenzyme A hydrolase (HIBCH), 2, mRNA.                                    |
| C21orf51  | -2.39 | -1.46 NM_001042401.1 | Homo sapiens chromosome 21 open reading frame 51 (C21orf51), 2, mRNA.                                      |
| LOC730525 | -2.39 | -1.4 XM_001126202.1  | PREDICTED: Homo sapiens hypothetical protein LOC730525 (LOC730525), mRNA.                                  |
| UBE2C     | -2.38 | -1.53 NM_181803.1    | Homo sapiens ubiquitin-conjugating enzyme E2C (UBE2C), 6, mRNA.                                            |
| ABCB1     | -2.38 | -1.39 NM_000927.3    | Homo sapiens ATP-binding cassette, sub-family B (MDR/TAP), member 1 (ABCB1), mRNA.                         |
| PDSS1     | -2.38 | -1.45 NM_014317.3    | Homo sapiens prenyl (decaprenyl) diphosphate synthase, subunit 1 (PDSS1), mRNA.                            |
| CD58      | -2.38 | -1.47 NM_001779.1    | Homo sapiens CD58 molecule (CD58), mRNA.                                                                   |
| DKC1      | -2.38 | -1.57 NM_001363.2    | Homo sapiens dyskeratosis congenita 1, dyskerin (DKC1), mRNA.                                              |
| EFR3A     | -2.38 | -1.49 NM_015137.3    | Homo sapiens EFR3 homolog A (S. cerevisiae) (EFR3A), mRNA.                                                 |
| OBFC2B    | -2.38 | -1.46 NM_024068.2    | Homo sapiens oligonucleotide/oligosaccharide-binding fold containing 2B (OBFC2B), mRNA.                    |
| C17orf58  | -2.38 | -1.45 NM_181656.3    | Homo sapiens chromosome 17 open reading frame 58 (C17orf58), 2, mRNA.                                      |
| C14orf130 | -2.37 | -1.45 NM_001100417.1 | Homo sapiens chromosome 14 open reading frame 130 (C14orf130), 3, mRNA.                                    |
| PTPN3     | -2.37 | -1.4 NM_002829.2     | Homo sapiens protein tyrosine phosphatase, non-receptor type 3 (PTPN3), mRNA.                              |
| GPR161    | -2.37 | -1.36 NM_007369.2    | Homo sapiens G protein-coupled receptor 161 (GPR161), 1, mRNA.                                             |
| REPIN1    | -2.37 | -1.52 NM_014374.1    | Homo sapiens replication initiator 1 (REPIN1), 2, mRNA.                                                    |
| HOOK1     | -2.37 | -1.42 NM_015888.4    | Homo sapiens hook homolog 1 (Drosophila) (HOOK1), mRNA.                                                    |
| BIVM      | -2.37 | -1.45 NM_017693.2    | Homo sapiens basic, immunoglobulin-like variable motif containing (BIVM), mRNA.                            |
| MUTED     | -2.37 | -1.45 NM_201280.1    | Homo sapiens muted homolog (mouse) (MUTED), mRNA.                                                          |
| C12orf11  | -2.37 | -1.41 NM_018164.1    | Homo sapiens chromosome 12 open reading frame 11 (C12orf11), mRNA.                                         |
| C2orf44   | -2.37 | -1.45 NM_025203.1    | Homo sapiens chromosome 2 open reading frame 44 (C2orf44), mRNA.                                           |
| MPP5      | -2.37 | -1.46 NM_022474.2    | Homo sapiens membrane protein, palmitoylated 5 (MAGUK p55 subfamily member 5) (MPP5), mRNA.                |
| TSGA14    | -2.37 | -1.42 NM_018718.1    | Homo sapiens testis specific, 14 (TSGA14), mRNA.                                                           |
| LAMP2     | -2.37 | -1.5 NM_013995.1     | Homo sapiens lysosomal-associated membrane protein 2 (LAMP2), LAMP2B, mRNA.                                |
| PCYOX1    | -2.36 | -1.43 NM_016297.2    | Homo sapiens prenylcysteine oxidase 1 (PCYOX1), mRNA.                                                      |
| STAG1     | -2.36 | -1.47 NM_005862.2    | Homo sapiens stromal antigen 1 (STAG1), mRNA.                                                              |
| ALDH1B1   | -2.36 | -1.43 NM_000692.3    | Homo sapiens aldehyde dehydrogenase 1 family, member B1 (ALDH1B1),                                         |
| EDG8      | -2.36 | -1.39 NM_030760.3    | Homo sapiens endothelial differentiation, sphingolipid G-protein-coupled receptor, 8 (EDG8), mRNA.         |
| PHF3      | -2.35 | -1.4 NM_015153.1     | Homo sapiens PHD finger protein 3 (PHF3), mRNA.                                                            |
| HPSE      | -2.35 | -1.39 NM_006665.2    | Homo sapiens heparanase (HPSE), mRNA.                                                                      |
| PPP3CA    | -2.35 | -1.37 NM_000944.3    | Homo sapiens protein phosphatase 3 (formerly 2B), catalytic subunit, alpha isoform (PPP3CA), mRNA.         |
| PPARGC1B  | -2.35 | -1.39 NM_133263.2    | Homo sapiens peroxisome proliferator-activated receptor gamma, coactivator 1 beta (PPARGC1B), mRNA.        |
| DUT       | -2.35 | -1.39 NM_001025248.1 | Homo sapiens deoxyuridine triphosphatase (DUT),                                                            |



|           |       |       |                |                                                                                                                    |
|-----------|-------|-------|----------------|--------------------------------------------------------------------------------------------------------------------|
| C18orf54  | -2.35 | -1.39 | NM_173529.3    | Homo sapiens chromosome 18 open reading frame 54 (C18orf54), mRNA.                                                 |
| LOC647691 | -2.35 | -1.36 | XM_936748.1    | PREDICTED: Homo sapiens similar to dicer1 (LOC647691), mRNA.                                                       |
| FAM18B    | -2.35 | -1.46 | NM_016078.4    | Homo sapiens family with sequence similarity 18, member B (FAM18B), mRNA.                                          |
| DDX12     | -2.35 | -1.37 | XM_931833.1    | PREDICTED: Homo sapiens DEAD/H (Asp-Glu-Ala-Asp/His) box polypeptide 12                                            |
| C14orf138 | -2.35 | -1.42 | NM_024558.2    | Homo sapiens chromosome 14 open reading frame 138 (C14orf138), 1, mRNA.                                            |
| LOC647009 | -2.35 | -1.41 | XM_929993.1    | PREDICTED: Homo sapiens similar to CG10343-PA (LOC647009), mRNA.                                                   |
| CLUAP1    | -2.35 | -1.38 | NM_024793.1    | Homo sapiens clusterin associated protein 1 (CLUAP1), 2, mRNA.                                                     |
| SOHLH2    | -2.34 | -1.4  | NM_017826.1    | Homo sapiens spermatogenesis and oogenesis specific basic helix-loop-helix 2 (SOHLH2), mRNA.                       |
| SCAMP5    | -2.34 | -1.38 | NM_138967.2    | Homo sapiens secretory carrier membrane protein 5 (SCAMP5), mRNA.                                                  |
| NUP210    | -2.34 | -1.45 | NM_024923.2    | Homo sapiens nucleoporin 210kDa (NUP210), mRNA.                                                                    |
| CHN1      | -2.34 | -1.41 | NM_001025201.1 | Homo sapiens chimerin (chimaerin) 1 (CHN1), 2, mRNA.                                                               |
| PURA      | -2.34 | -1.43 | NM_005859.3    | Homo sapiens purine-rich element binding protein A (PURA), mRNA.                                                   |
| TRIM4     | -2.34 | -1.4  | NM_033091.1    | Homo sapiens tripartite motif-containing 4 (TRIM4), beta, mRNA.                                                    |
|           | -2.34 | -1.37 | AK096154       | Homo sapiens cDNA FLJ38835 fis, clone MESAN2002424                                                                 |
| NOB1      | -2.34 | -1.42 | NM_014062.1    | Homo sapiens NIN1/RPN12 binding protein 1 homolog (S. cerevisiae) (NOB1), mRNA.                                    |
| DBT       | -2.33 | -1.38 | NM_001918.2    | Homo sapiens dihydrolipoamide branched chain transacylase E2, mRNA.                                                |
| CCDC99    | -2.33 | -1.5  | NM_017785.3    | Homo sapiens coiled-coil domain containing 99 (CCDC99), mRNA.                                                      |
| KDELC2    | -2.33 | -1.46 | NM_153705.4    | Homo sapiens KDEL (Lys-Asp-Glu-Leu) containing 2 (KDELC2), mRNA.                                                   |
| FAM127C   | -2.33 | -1.38 | NM_001078173.1 | Homo sapiens family with sequence similarity 127, member C (FAM127C), mRNA.                                        |
| ETS2      | -2.32 | -1.44 | NM_005239.4    | Homo sapiens v-ets erythroblastosis virus E26 oncogene homolog 2 (avian) (ETS2), mRNA.                             |
| PHF19     | -2.32 | -1.42 | NM_001009936.1 | Homo sapiens PHD finger protein 19 (PHF19), 2, mRNA.                                                               |
| GLCE      | -2.32 | -1.42 | NM_015554.1    | Homo sapiens glucuronic acid epimerase (GLCE), mRNA.                                                               |
| DHRS13    | -2.32 | -1.39 | NM_144683.3    | Homo sapiens dehydrogenase/reductase (SDR family) member 13 (DHRS13), mRNA.                                        |
| KIAA1737  | -2.32 | -1.42 | NM_033426.2    | Homo sapiens KIAA1737 (KIAA1737), mRNA.                                                                            |
| LOC643918 | -2.32 | -1.38 | XM_933328.1    | PREDICTED: Homo sapiens hypothetical protein LOC643917, 3 (LOC643918), mRNA.                                       |
| CEP152    | -2.32 | -1.38 | NM_014985.1    | Homo sapiens centrosomal protein 152kDa (CEP152), mRNA.                                                            |
| LOC728014 | -2.32 | -1.41 | XM_001127981.1 | PREDICTED: Homo sapiens similar to huntingtin interacting protein 1 related (LOC728014), mRNA.                     |
| LOC388564 | -2.32 | -1.43 | XM_498725.3    | PREDICTED: Homo sapiens hypothetical gene supported by BC052596 (LOC388564), mRNA.                                 |
|           | -2.32 | -1.48 | BX537698       | Homo sapiens mRNA; cDNA DKFZp686F09166 (from clone DKFZp686F09166)                                                 |
| NRGN      | -2.31 | -1.37 | NM_006176.1    | Homo sapiens neurogranin (protein kinase C substrate, RC3) (NRGN), mRNA.                                           |
| CDR2      | -2.31 | -1.45 | NM_001802.1    | Homo sapiens cerebellar degeneration-related protein 2, 62kDa (CDR2), mRNA.                                        |
| EAF2      | -2.31 | -1.39 | NM_018456.4    | Homo sapiens ELL associated factor 2 (EAF2), mRNA.                                                                 |
| HDHD2     | -2.31 | -1.38 | NM_032124.4    | Homo sapiens haloacid dehalogenase-like hydrolase domain containing 2 (HDHD2), mRNA.                               |
| MAPK6     | -2.31 | -1.47 | NM_002748.2    | Homo sapiens mitogen-activated protein kinase 6 (MAPK6), mRNA.                                                     |
| CKB       | -2.31 | -1.49 | NM_001823.3    | Homo sapiens creatine kinase, brain (CKB), mRNA.                                                                   |
| NNT       | -2.3  | -1.45 | NM_012343.3    | Homo sapiens nicotinamide nucleotide transhydrogenase (NNT),                                                       |
| BID       | -2.3  | -1.38 | NM_197967.1    | Homo sapiens BH3 interacting domain death agonist (BID), 3, mRNA.                                                  |
| REV1      | -2.3  | -1.43 | NM_001037872.1 | Homo sapiens REV1 homolog (S. cerevisiae) (REV1), 2, mRNA.                                                         |
| YEATS4    | -2.3  | -1.48 | NM_006530.2    | Homo sapiens YEATS domain containing 4 (YEATS4), mRNA.                                                             |
| FAM54A    | -2.3  | -1.38 | NM_001099286.1 | Homo sapiens family with sequence similarity 54, member A (FAM54A), 1, mRNA.                                       |
| ZNF650    | -2.3  | -1.42 | NM_172070.2    | Homo sapiens zinc finger protein 650 (ZNF650), mRNA.                                                               |
| RPL22     | -2.29 | -1.49 | NM_000983.3    | Homo sapiens ribosomal protein L22 (RPL22), mRNA.                                                                  |
| PIGA      | -2.29 | -1.47 | NM_020473.2    | Homo sapiens phosphatidylinositol glycan anchor biosynthesis, class A (paroxysmal nocturnal hemoglobinuria) (PIGA) |
| PIGY      | -2.29 | -1.47 | NM_001042616.1 | Homo sapiens phosphatidylinositol glycan anchor biosynthesis, class Y (PIGY), 2, mRNA.                             |
| TMEM5     | -2.29 | -1.48 | NM_014254.1    | Homo sapiens transmembrane protein 5 (TMEM5), mRNA.                                                                |
| LOC643995 | -2.29 | -1.38 | XM_934410.1    | PREDICTED: Homo sapiens similar to Importin alpha-2 subunit (Karyopherin alpha-2 subunit) (SRP1-alpha)             |
| THOC4     | -2.28 | -1.44 | NM_005782.2    | Homo sapiens THO complex 4 (THOC4), mRNA.                                                                          |
| PCBD2     | -2.28 | -1.36 | NM_032151.3    | Homo sapiens pterin-4 alpha-carbinolamine dehydratase/dimerization cofactor of hepatocyte nuclear factor 1 alpha   |
| CDC7      | -2.28 | -1.44 | NM_003503.2    | Homo sapiens cell division cycle 7 homolog (S. cerevisiae) (CDC7), mRNA.                                           |

|           |       |                      |                                                                                                                 |
|-----------|-------|----------------------|-----------------------------------------------------------------------------------------------------------------|
|           | -2.28 | -1.45 AK130049       | Homo sapiens cDNA FLJ26539 fis, clone KDN09310                                                                  |
| C20orf27  | -2.28 | -1.44 NM_001039140.1 | Homo sapiens chromosome 20 open reading frame 27 (C20orf27), mRNA.                                              |
| YOD1      | -2.28 | -1.47 NM_018566.3    | Homo sapiens YOD1 OTU deubiquinating enzyme 1 homolog (S. cerevisiae) (YOD1), mRNA.                             |
| C18orf25  | -2.28 | -1.46 NM_001008239.2 | Homo sapiens chromosome 18 open reading frame 25 (C18orf25), 2, mRNA.                                           |
| C5orf28   | -2.28 | -1.38 NM_022483.3    | Homo sapiens chromosome 5 open reading frame 28 (C5orf28), mRNA.                                                |
| WDR74     | -2.28 | -1.42 XM_001125771.1 | PREDICTED: Homo sapiens WD repeat domain 74 (WDR74), mRNA.                                                      |
| FAM119B   | -2.28 | -1.4 NM_015433.2     | Homo sapiens family with sequence similarity 119, member B (FAM119B), 1, mRNA.                                  |
| GPR64     | -2.27 | -1.48 NM_005756.2    | Homo sapiens G protein-coupled receptor 64 (GPR64), 4, mRNA.                                                    |
| CHRNA5    | -2.27 | -1.38 NM_000745.2    | Homo sapiens cholinergic receptor, nicotinic, alpha 5 (CHRNA5), mRNA.                                           |
| IL1F7     | -2.27 | -1.38 NM_014439.3    | Homo sapiens interleukin 1 family, member 7 (zeta) (IL1F7), 1, mRNA.                                            |
| CHD9      | -2.27 | -1.45 NM_025134.4    | Homo sapiens chromodomain helicase DNA binding protein 9 (CHD9), mRNA.                                          |
| MORC2     | -2.27 | -1.41 NM_014941.1    | Homo sapiens MORC family CW-type zinc finger 2 (MORC2), mRNA.                                                   |
| BRMS1L    | -2.27 | -1.37 NM_032352.3    | Homo sapiens breast cancer metastasis-suppressor 1-like (BRMS1L), mRNA.                                         |
|           | -2.27 | -1.37 DR977977       | SM011178 Brain 3 EST Homo sapiens cDNA clone ID_11178 3', mRNA sequence                                         |
| C9orf91   | -2.27 | -1.4 NM_153045.2     | Homo sapiens chromosome 9 open reading frame 91 (C9orf91), mRNA.                                                |
| LOC653066 | -2.27 | -1.37 XM_930921.1    | PREDICTED: Homo sapiens similar to inhibitor of growth family, member 5, 4 (LOC653066), mRNA.                   |
| FBL       | -2.26 | -1.53 NM_001436.2    | Homo sapiens fibrillarlin (FBL), mRNA.                                                                          |
| USP48     | -2.26 | -1.4 NM_001032730.1  | Homo sapiens ubiquitin specific peptidase 48 (USP48), 2, mRNA.                                                  |
| DCK       | -2.26 | -1.39 NM_000788.1    | Homo sapiens deoxycytidine kinase (DCK), mRNA.                                                                  |
| GOT1      | -2.26 | -1.48 NM_002079.1    | Homo sapiens glutamic-oxaloacetic transaminase 1, soluble (aspartate aminotransferase 1) (GOT1), mRNA.          |
| LACTB     | -2.26 | -1.37 NM_171846.1    | Homo sapiens lactamase, beta (LACTB), 2, mRNA.                                                                  |
| LOC91431  | -2.26 | -1.34 NM_001099776.1 | Homo sapiens prematurely terminated mRNA decay factor-like (LOC91431), mRNA.                                    |
| SDHA      | -2.25 | -1.5 NM_004168.1     | Homo sapiens succinate dehydrogenase complex, subunit A, flavoprotein (Fp) (SDHA)                               |
| GEMIN6    | -2.25 | -1.46 NM_024775.9    | Homo sapiens gem (nuclear organelle) associated protein 6 (GEMIN6), mRNA.                                       |
| MSH5      | -2.25 | -1.38 NM_172166.2    | Homo sapiens mutS homolog 5 (E. coli) (MSH5), 4, mRNA.                                                          |
| CKAP2     | -2.25 | -1.43 NM_018204.2    | Homo sapiens cytoskeleton associated protein 2 (CKAP2), mRNA.                                                   |
| FAM86B1   | -2.25 | -1.36 NM_001083537.1 | Homo sapiens family with sequence similarity 86, member B1 (FAM86B1), 1, mRNA.                                  |
| LOC652685 | -2.25 | -1.43 XM_942289.1    | PREDICTED: Homo sapiens similar to PMS1 protein homolog 2 (DNA mismatch repair protein PMS2) (LOC652685), mRNA. |
| TTC26     | -2.25 | -1.41 NM_024926.1    | Homo sapiens tetratricopeptide repeat domain 26 (TTC26), mRNA.                                                  |
| SDHA      | -2.24 | -1.54 NM_004168.1    | Homo sapiens succinate dehydrogenase complex, subunit A, flavoprotein (Fp) (SDHA)                               |
| SLC25A22  | -2.24 | -1.41 NM_024698.4    | Homo sapiens solute carrier family 25 (mitochondrial carrier: glutamate), member 22 (SLC25A22)                  |
| TGFBRAP1  | -2.24 | -1.38 NM_004257.3    | Homo sapiens transforming growth factor, beta receptor associated protein 1 (TGFBRAP1), mRNA.                   |
| KCTD3     | -2.24 | -1.46 NM_016121.3    | Homo sapiens potassium channel tetramerisation domain containing 3 (KCTD3), mRNA.                               |
| STAG1     | -2.24 | -1.42 NM_005862.2    | Homo sapiens stromal antigen 1 (STAG1), mRNA.                                                                   |
| ASNS      | -2.24 | -1.38 NM_133436.1    | Homo sapiens asparagine synthetase (ASNS), 1, mRNA.                                                             |
| C4orf32   | -2.24 | -1.39 NM_152400.1    | Homo sapiens chromosome 4 open reading frame 32 (C4orf32), mRNA.                                                |
| TRNT1     | -2.23 | -1.41 NM_182916.1    | Homo sapiens tRNA nucleotidyl transferase, CCA-adding, 1 (TRNT1), mRNA.                                         |
| SMC3      | -2.23 | -1.47 NM_005445.3    | Homo sapiens structural maintenance of chromosomes 3 (SMC3), mRNA.                                              |
| CDK5RAP2  | -2.23 | -1.43 NM_018249.4    | Homo sapiens CDK5 regulatory subunit associated protein 2 (CDK5RAP2), 1, mRNA.                                  |
| MGC40489  | -2.23 | -1.44 XR_016048.1    | PREDICTED: Homo sapiens hypothetical protein MGC40489 (MGC40489), misc RNA.                                     |
| SNTB2     | -2.23 | -1.36 NM_006750.3    | Homo sapiens syntrophin, beta 2 (dystrophin-associated protein A1, 59kDa, basic component 2) (SNTB2), mRNA.     |
| MLF1IP    | -2.22 | -1.35 NM_024629.2    | Homo sapiens MLF1 interacting protein (MLF1IP), mRNA.                                                           |
| PI4KB     | -2.22 | -1.42 NM_002651.1    | Homo sapiens phosphatidylinositol 4-kinase, catalytic, beta (PI4KB), mRNA.                                      |
| PHGDH     | -2.22 | -1.58 NM_006623.2    | Homo sapiens phosphoglycerate dehydrogenase (PHGDH), mRNA.                                                      |
| GALK2     | -2.22 | -1.37 NM_001001556.1 | Homo sapiens galactokinase 2 (GALK2), 2, mRNA.                                                                  |
| MTERFD1   | -2.22 | -1.45 NM_015942.3    | Homo sapiens MTERF domain containing 1 (MTERFD1), mRNA.                                                         |
|           | -2.22 | -1.38 BC039397       | Homo sapiens cDNA clone IMAGE:5299888                                                                           |
| LOC440498 | -2.21 | -1.36 XM_938817.2    | PREDICTED: Homo sapiens hypothetical gene supported by AK001829 (LOC440498), mRNA.                              |
| C14orf135 | -2.21 | -1.4 NM_022495.3     | Homo sapiens chromosome 14 open reading frame 135 (C14orf135), mRNA.                                            |

|          |       |       |                |                                                                                          |
|----------|-------|-------|----------------|------------------------------------------------------------------------------------------|
| SF3B3    | -2.2  | -1.45 | NM_012426.3    | Homo sapiens splicing factor 3b, subunit 3, 130kDa (SF3B3), mRNA.                        |
| PNPT1    | -2.2  | -1.38 | NM_033109.2    | Homo sapiens polyribonucleotide nucleotidyltransferase 1 (PNPT1), mRNA.                  |
| BRWD1    | -2.2  | -1.35 | NM_033656.2    | Homo sapiens bromodomain and WD repeat domain containing 1 (BRWD1), 2, mRNA.             |
| CCDC112  | -2.2  | -1.36 | NM_001040440.2 | Homo sapiens coiled-coil domain containing 112 (CCDC112), 1, mRNA.                       |
| CCNH     | -2.2  | -1.44 | NM_001239.2    | Homo sapiens cyclin H (CCNH), mRNA.                                                      |
| WDSOF1   | -2.2  | -1.36 | NM_015420.5    | Homo sapiens WD repeats and SOF1 domain containing (WDSOF1), mRNA.                       |
| PCGF6    | -2.19 | -1.43 | NM_032154.3    | Homo sapiens polycomb group ring finger 6 (PCGF6), 2, mRNA.                              |
| SDCCAG3  | -2.19 | -1.48 | NM_001039708.1 | Homo sapiens serologically defined colon cancer antigen 3 (SDCCAG3), 3, mRNA.            |
| FBXL6    | -2.18 | -1.38 | NM_012162.1    | Homo sapiens F-box and leucine-rich repeat protein 6 (FBXL6), 1, mRNA.                   |
| MAP4K5   | -2.18 | -1.39 | NM_198794.1    | Homo sapiens mitogen-activated protein kinase kinase kinase 5 (MAP4K5), 2, mRNA.         |
| CDC2L6   | -2.18 | -1.4  | NM_015076.3    | Homo sapiens cell division cycle 2-like 6 (CDK8-like) (CDC2L6), mRNA.                    |
| AKT1     | -2.18 | -1.43 | NM_001014432.1 | Homo sapiens v-akt murine thymoma viral oncogene homolog 1 (AKT1), 2, mRNA.              |
| CMTM4    | -2.18 | -1.38 | NM_181521.2    | Homo sapiens CKLF-like MARVEL transmembrane domain containing 4 (CMTM4), 2, mRNA.        |
| LOC85390 | -2.18 | -1.37 | NR_001454.1    | Homo sapiens RNA, small nucleolar (LOC85390) on chromosome 11.                           |
| ZNF280C  | -2.17 | -1.39 | NM_017666.2    | Homo sapiens zinc finger protein 280C (ZNF280C), mRNA.                                   |
| MRPL30   | -2.17 | -1.43 | NM_145212.2    | Homo sapiens mitochondrial ribosomal protein L30 (MRPL30),                               |
| CETN3    | -2.17 | -1.4  | NM_004365.2    | Homo sapiens centrin, EF-hand protein, 3 (CDC31 homolog, yeast) (CETN3), mRNA.           |
| CUTC     | -2.17 | -1.46 | NM_015960.2    | Homo sapiens cutC copper transporter homolog (E. coli) (CUTC), mRNA.                     |
| COMMD6   | -2.17 | -1.49 | NM_203497.2    | Homo sapiens COMM domain containing 6 (COMMD6), 1, mRNA.                                 |
| CEP110   | -2.17 | -1.33 | NM_007018.4    | Homo sapiens centrosomal protein 110kDa (CEP110), mRNA.                                  |
| MARCKSL1 | -2.17 | -1.48 | NM_023009.4    | Homo sapiens MARCKS-like 1 (MARCKSL1), mRNA.                                             |
| PEX11A   | -2.16 | -1.36 | NM_003847.1    | Homo sapiens peroxisomal biogenesis factor 11A (PEX11A), mRNA.                           |
| TUBD1    | -2.16 | -1.36 | NM_016261.2    | Homo sapiens tubulin, delta 1 (TUBD1), mRNA.                                             |
| CECR5    | -2.16 | -1.49 | NM_033070.2    | Homo sapiens cat eye syndrome chromosome region, candidate 5 (CECR5), 2, mRNA.           |
| UBIAD1   | -2.16 | -1.38 | NM_013319.1    | Homo sapiens UbiA prenyltransferase domain containing 1 (UBIAD1), mRNA.                  |
|          | -2.16 | -1.34 | AL117598       | Homo sapiens mRNA; cDNA DKFZp564H1663 (from clone DKFZp564H1663)                         |
| ST7      | -2.16 | -1.39 | NM_018412.3    | Homo sapiens suppression of tumorigenicity 7 (ST7), a, mRNA.                             |
| ARHGEF3  | -2.15 | -1.44 | NM_019555.1    | Homo sapiens Rho guanine nucleotide exchange factor (GEF) 3 (ARHGEF3), mRNA.             |
| SEC23IP  | -2.15 | -1.4  | NM_007190.2    | Homo sapiens SEC23 interacting protein (SEC23IP), mRNA.                                  |
| BTF3L4   | -2.15 | -1.4  | NM_152265.1    | Homo sapiens basic transcription factor 3-like 4 (BTF3L4), mRNA.                         |
| SMEK2    | -2.15 | -1.45 | NM_020463.1    | Homo sapiens SMEK homolog 2, suppressor of mek1 (Dictyostelium) (SMEK2), mRNA.           |
| BOP1     | -2.14 | -1.5  | NM_015201.3    | Homo sapiens block of proliferation 1 (BOP1), mRNA.                                      |
| GFM1     | -2.14 | -1.46 | NM_024996.5    | Homo sapiens G elongation factor, mitochondrial 1 (GFM1), mRNA.                          |
| BTG3     | -2.14 | -1.43 | NM_006806.3    | Homo sapiens BTG family, member 3 (BTG3), mRNA.                                          |
| CSTF3    | -2.14 | -1.45 | NM_001326.2    | Homo sapiens cleavage stimulation factor, 3' pre-RNA, subunit 3, 77kDa (CSTF3), 1, mRNA. |
| PBX3     | -2.14 | -1.41 | NM_006195.4    | Homo sapiens pre-B-cell leukemia homeobox 3 (PBX3), mRNA.                                |
| LAMP2    | -2.14 | -1.43 | NM_013995.1    | Homo sapiens lysosomal-associated membrane protein 2 (LAMP2), LAMP2B, mRNA.              |
| SP4      | -2.13 | -1.33 | NM_003112.3    | Homo sapiens Sp4 transcription factor (SP4), mRNA.                                       |
| IFNAR2   | -2.13 | -1.35 | NM_207585.1    | Homo sapiens interferon (alpha, beta and omega) receptor 2 (IFNAR2), 1, mRNA.            |
| C13orf25 | -2.13 | -1.33 | XM_931068.1    | PREDICTED: Homo sapiens chromosome 13 open reading frame 25 (C13orf25), mRNA.            |
| C16orf84 | -2.13 | -1.32 | NM_001012762.1 | Homo sapiens chromosome 16 open reading frame 84 (C16orf84), 2, mRNA.                    |
| CCDC34   | -2.13 | -1.51 | NM_030771.1    | Homo sapiens coiled-coil domain containing 34 (CCDC34), 1, mRNA.                         |
| ABI2     | -2.13 | -1.4  | XM_001126750.1 | PREDICTED: Homo sapiens abl interactor 2 (ABI2), mRNA.                                   |
| MGC27345 | -2.13 | -1.34 | XR_001069.1    | PREDICTED: Homo sapiens hypothetical protein MGC27345 (MGC27345), misc RNA.              |
| FKBPL    | -2.12 | -1.34 | NM_022110.3    | Homo sapiens FK506 binding protein like (FKBPL), mRNA.                                   |
| CHURC1   | -2.12 | -1.43 | NM_145165.2    | Homo sapiens churchill domain containing 1 (CHURC1), mRNA.                               |
| UAP1     | -2.12 | -1.43 | NM_003115.3    | Homo sapiens UDP-N-acetylglucosamine pyrophosphorylase 1 (UAP1), mRNA.                   |
| ACTR8    | -2.12 | -1.33 | NM_022899.3    | Homo sapiens ARP8 actin-related protein 8 homolog (yeast) (ACTR8), mRNA.                 |
| HELLS    | -2.12 | -1.36 | NM_018063.3    | Homo sapiens helicase, lymphoid-specific (HELLS), mRNA.                                  |

|           |       |       |                |                                                                                                               |
|-----------|-------|-------|----------------|---------------------------------------------------------------------------------------------------------------|
| RC3H2     | -2.12 | -1.36 | NM_018835.1    | Homo sapiens ring finger and CCCH-type zinc finger domains 2 (RC3H2), mRNA.                                   |
| HOXC4     | -2.11 | -1.4  | NM_014620.4    | Homo sapiens homeobox C4 (HOXC4), 1, mRNA.                                                                    |
| NAT13     | -2.11 | -1.39 | NM_025146.1    | Homo sapiens N-acetyltransferase 13 (NAT13), mRNA.                                                            |
| API5      | -2.11 | -1.45 | NM_006595.2    | Homo sapiens apoptosis inhibitor 5 (API5), mRNA.                                                              |
| FAM111A   | -2.11 | -1.33 | NM_022074.2    | Homo sapiens family with sequence similarity 111, member A (FAM111A), 1, mRNA.                                |
|           | -2.11 | -1.46 | AL137257       | Homo sapiens mRNA; cDNA DKFZp434C1613 (from clone DKFZp434C1613)                                              |
| ZCCHC7    | -2.11 | -1.41 | NM_032226.2    | Homo sapiens zinc finger, CCHC domain containing 7 (ZCCHC7), mRNA.                                            |
| PPP3CC    | -2.11 | -1.37 | NM_005605.3    | Homo sapiens protein phosphatase 3 (formerly 2B), catalytic subunit, gamma isoform (PPP3CC), mRNA.            |
| LOC389137 | -2.11 | -1.4  | XM_371655.3    | PREDICTED: Homo sapiens hypothetical LOC389137, 2 (LOC389137), mRNA.                                          |
| PPP2R2B   | -2.1  | -1.44 | NM_181676.1    | Homo sapiens protein phosphatase 2 (formerly 2A), regulatory subunit B, beta isoform (PPP2R2B)                |
| TGIF2     | -2.1  | -1.36 | NM_021809.5    | Homo sapiens TGFB-induced factor homeobox 2 (TGIF2), mRNA.                                                    |
| MAD2L2    | -2.1  | -1.46 | NM_006341.2    | Homo sapiens MAD2 mitotic arrest deficient-like 2 (yeast) (MAD2L2), mRNA.                                     |
| DPP7      | -2.1  | -1.37 | NM_013379.2    | Homo sapiens dipeptidyl-peptidase 7 (DPP7), mRNA.                                                             |
| TMEM180   | -2.1  | -1.35 | NM_024789.3    | Homo sapiens transmembrane protein 180 (TMEM180), mRNA.                                                       |
| LOC201725 | -2.1  | -1.33 | NM_001008393.1 | Homo sapiens hypothetical protein LOC201725 (LOC201725), mRNA.                                                |
| TBC1D4    | -2.1  | -1.37 | NM_014832.2    | Homo sapiens TBC1 domain family, member 4 (TBC1D4), mRNA.                                                     |
| THOC1     | -2.09 | -1.4  | NM_005131.2    | Homo sapiens THO complex 1 (THOC1), mRNA.                                                                     |
| RFC1      | -2.09 | -1.34 | NM_002913.3    | Homo sapiens replication factor C (activator 1) 1, 145kDa (RFC1), mRNA.                                       |
| RRP9      | -2.09 | -1.32 | NM_004704.3    | Homo sapiens ribosomal RNA processing 9, small subunit (SSU) processome component, homolog (yeast) (RRP9)     |
| KCTD14    | -2.09 | -1.36 | NM_023930.3    | Homo sapiens potassium channel tetramerisation domain containing 14 (KCTD14), mRNA.                           |
| AKAP7     | -2.09 | -1.35 | NM_004842.2    | Homo sapiens A kinase (PRKA) anchor protein 7 (AKAP7), alpha, mRNA.                                           |
| ROCK2     | -2.09 | -1.44 | NM_004850.3    | Homo sapiens Rho-associated, coiled-coil containing protein kinase 2 (ROCK2), mRNA.                           |
| OIP5      | -2.09 | -1.36 | NM_007280.1    | Homo sapiens Opa interacting protein 5 (OIP5), mRNA.                                                          |
| LAMC3     | -2.09 | -1.38 | NM_006059.3    | Homo sapiens laminin, gamma 3 (LAMC3), mRNA.                                                                  |
| C9orf116  | -2.09 | -1.36 | NM_144654.2    | Homo sapiens chromosome 9 open reading frame 116 (C9orf116), 2, mRNA.                                         |
| C7orf24   | -2.09 | -1.46 | NM_024051.2    | Homo sapiens chromosome 7 open reading frame 24 (C7orf24), mRNA.                                              |
| C3orf58   | -2.09 | -1.34 | NM_173552.2    | Homo sapiens chromosome 3 open reading frame 58 (C3orf58), mRNA.                                              |
| C14orf135 | -2.09 | -1.38 | NM_022495.5    | Homo sapiens chromosome 14 open reading frame 135 (C14orf135), mRNA.                                          |
| GSDMDC1   | -2.09 | -1.35 | NM_024736.5    | Homo sapiens gasdermin domain containing 1 (GSDMDC1), mRNA.                                                   |
|           | -2.09 | -1.35 | BX538337       | Homo sapiens mRNA; cDNA DKFZp686I23208 (from clone DKFZp686I23208)                                            |
| UBE3C     | -2.08 | -1.44 | NM_014671.1    | Homo sapiens ubiquitin protein ligase E3C (UBE3C), mRNA.                                                      |
| TMED5     | -2.08 | -1.45 | NM_016040.3    | Homo sapiens transmembrane emp24 protein transport domain containing 5 (TMED5), mRNA.                         |
| RAB5C     | -2.08 | -1.43 | NM_201434.1    | Homo sapiens RAB5C, member RAS oncogene family (RAB5C), 1, mRNA.                                              |
| TWF1      | -2.08 | -1.31 | NM_002822.3    | Homo sapiens twinfilin, actin-binding protein, homolog 1 (Drosophila) (TWF1), mRNA.                           |
| ANKRD16   | -2.08 | -1.35 | NM_019046.1    | Homo sapiens ankyrin repeat domain 16 (ANKRD16), 1, mRNA.                                                     |
| C16orf59  | -2.08 | -1.37 | NM_025108.2    | Homo sapiens chromosome 16 open reading frame 59 (C16orf59), mRNA.                                            |
| HNRNPUL2  | -2.08 | -1.37 | NM_001079559.1 | Homo sapiens heterogeneous nuclear ribonucleoprotein U-like 2 (HNRNPUL2), mRNA.                               |
| C12orf30  | -2.08 | -1.38 | NM_024953.2    | Homo sapiens chromosome 12 open reading frame 30 (C12orf30), mRNA.                                            |
| NCBP1     | -2.07 | -1.43 | NM_002486.4    | Homo sapiens nuclear cap binding protein subunit 1, 80kDa (NCBP1), mRNA.                                      |
| TAF4B     | -2.07 | -1.31 | NM_005640.1    | Homo sapiens TAF4b RNA polymerase II, TATA box binding protein (TBP)-associated factor, 105kDa (TAF4B), mRNA. |
| MPHOSPH9  | -2.07 | -1.34 | NM_022782.2    | Homo sapiens M-phase phosphoprotein 9 (MPHOSPH9), mRNA.                                                       |
| EXPH5     | -2.07 | -1.31 | NM_015065.1    | Homo sapiens exophilin 5 (EXPH5), mRNA.                                                                       |
| NAT10     | -2.07 | -1.44 | NM_024662.1    | Homo sapiens N-acetyltransferase 10 (NAT10), mRNA.                                                            |
| KIAA1147  | -2.07 | -1.41 | NM_001080392.1 | Homo sapiens KIAA1147 (KIAA1147), mRNA.                                                                       |
| SIP1      | -2.06 | -1.39 | NM_001009182.1 | Homo sapiens survival of motor neuron protein interacting protein 1 (SIP1), beta, mRNA.                       |
| SNAPC4    | -2.06 | -1.4  | NM_003086.2    | Homo sapiens small nuclear RNA activating complex, polypeptide 4, 190kDa (SNAPC4), mRNA.                      |
| SPAG1     | -2.06 | -1.35 | NM_003114.3    | Homo sapiens sperm associated antigen 1 (SPAG1), 1, mRNA.                                                     |
| B4GALT3   | -2.06 | -1.42 | NM_003779.2    | Homo sapiens UDP-Gal:betaGlcNAc beta 1,4- galactosyltransferase, polypeptide 3 (B4GALT3), mRNA.               |
| CCDC21    | -2.06 | -1.35 | NM_022778.2    | Homo sapiens coiled-coil domain containing 21 (CCDC21), mRNA.                                                 |

|           |       |       |                |                                                                                                                    |
|-----------|-------|-------|----------------|--------------------------------------------------------------------------------------------------------------------|
| UHRF2     | -2.05 | -1.34 | NM_152896.1    | Homo sapiens ubiquitin-like, containing PHD and RING finger domains, 2 (UHRF2), mRNA.                              |
| FTSJ1     | -2.05 | -1.4  | NM_012280.2    | Homo sapiens FtsJ homolog 1 (E. coli) (FTSJ1), 1, mRNA.                                                            |
| TRERF1    | -2.05 | -1.36 | NM_033502.1    | Homo sapiens transcriptional regulating factor 1 (TRERF1), mRNA.                                                   |
| C13orf7   | -2.05 | -1.37 | NM_024546.2    | Homo sapiens chromosome 13 open reading frame 7 (C13orf7), mRNA.                                                   |
| FIBP      | -2.05 | -1.36 | NM_198897.1    | Homo sapiens fibroblast growth factor (acidic) intracellular binding protein (FIBP), 1, mRNA.                      |
| MRPS26    | -2.05 | -1.43 | NM_030811.3    | Homo sapiens mitochondrial ribosomal protein S26 (MRPS26), mRNA.                                                   |
| CKAP2     | -2.05 | -1.39 | NM_001098525.1 | Homo sapiens cytoskeleton associated protein 2 (CKAP2), 2, mRNA.                                                   |
|           | -2.05 | -1.36 | BC037864       | Homo sapiens cDNA clone IMAGE:5272804                                                                              |
| LZTFL1    | -2.05 | -1.34 | NM_020347.2    | Homo sapiens leucine zipper transcription factor-like 1 (LZTFL1), mRNA.                                            |
| NFIC      | -2.04 | -1.38 | NM_205843.1    | Homo sapiens nuclear factor I/C (CCAAT-binding transcription factor) (NFIC), 2, mRNA.                              |
| VIL2      | -2.04 | -1.48 | NM_003379.3    | Homo sapiens villin 2 (ezrin) (VIL2), mRNA.                                                                        |
| FBXL3     | -2.04 | -1.34 | NM_012158.1    | Homo sapiens F-box and leucine-rich repeat protein 3 (FBXL3), mRNA.                                                |
| FANCD2    | -2.04 | -1.31 | NM_033084.3    | Homo sapiens Fanconi anemia, complementation group D2 (FANCD2), 1, mRNA.                                           |
| SEC16A    | -2.04 | -1.43 | NM_014866.1    | Homo sapiens SEC16 homolog A (S. cerevisiae) (SEC16A), mRNA.                                                       |
| TADA1L    | -2.04 | -1.38 | NM_053053.2    | Homo sapiens transcriptional adaptor 1 (HF11 homolog, yeast)-like (TADA1L), mRNA.                                  |
| C16orf61  | -2.04 | -1.52 | NM_020188.2    | Homo sapiens chromosome 16 open reading frame 61 (C16orf61), mRNA.                                                 |
| C12orf11  | -2.04 | -1.42 | NM_018164.1    | Homo sapiens chromosome 12 open reading frame 11 (C12orf11), mRNA.                                                 |
| LOC285216 | -2.04 | -1.31 | XM_496652.2    | PREDICTED: Homo sapiens hypothetical protein LOC285216 (LOC285216), mRNA.                                          |
| PHACTR4   | -2.04 | -1.43 | NM_001048183.1 | Homo sapiens phosphatase and actin regulator 4 (PHACTR4), 1, mRNA.                                                 |
| UBE3A     | -2.03 | -1.39 | NM_000462.2    | Homo sapiens ubiquitin protein ligase E3A (human papilloma virus E6-associated protein, Angelman syndrome) (UBE3A) |
| RAP2A     | -2.03 | -1.38 | NM_021033.5    | Homo sapiens RAP2A, member of RAS oncogene family (RAP2A), mRNA.                                                   |
| ADCY3     | -2.03 | -1.45 | NM_004036.3    | Homo sapiens adenylate cyclase 3 (ADCY3), mRNA.                                                                    |
| DHX30     | -2.03 | -1.37 | NM_014966.2    | Homo sapiens DEAH (Asp-Glu-Ala-His) box polypeptide 30 (DHX30), 2, mRNA.                                           |
| C5orf34   | -2.03 | -1.33 | NM_198566.1    | Homo sapiens chromosome 5 open reading frame 34 (C5orf34), mRNA.                                                   |
| SLTM      | -2.03 | -1.4  | NM_024755.2    | Homo sapiens SAFB-like, transcription modulator (SLTM), 1, mRNA.                                                   |
| ZMYND11   | -2.02 | -1.41 | NM_006624.3    | Homo sapiens zinc finger, MYND domain containing 11 (ZMYND11), 1, mRNA.                                            |
| GPHN      | -2.02 | -1.34 | NM_001024218.1 | Homo sapiens gephyrin (GPHN), 2, mRNA.                                                                             |
| FBXL10    | -2.02 | -1.43 | NM_032590.3    | Homo sapiens F-box and leucine-rich repeat protein 10 (FBXL10), 1, mRNA.                                           |
|           | -2.02 | -1.3  | BX091062       | BX091062 Soares_testis_NHT Homo sapiens cDNA clone IMAGp998F221782 ; IMAGE:726549, mRNA sequence                   |
| LOC440145 | -2.02 | -1.35 | NM_001071775.1 | Homo sapiens similar to RIKEN cDNA 2410129H14 (LOC440145), mRNA.                                                   |
| HABP4     | -2.02 | -1.34 | NM_014282.1    | Homo sapiens hyaluronan binding protein 4 (HABP4), mRNA.                                                           |
|           | -2.02 | -1.33 | AK091747       | Homo sapiens cDNA FLJ34428 fis, clone HLUNG2000761                                                                 |
| USP16     | -2.01 | -1.42 | NM_006447.2    | Homo sapiens ubiquitin specific peptidase 16 (USP16), 1, mRNA.                                                     |
| SIX4      | -2.01 | -1.37 | NM_017420.3    | Homo sapiens SIX homeobox 4 (SIX4), mRNA.                                                                          |
| AP2B1     | -2.01 | -1.35 | NM_001282.2    | Homo sapiens adaptor-related protein complex 2, beta 1 subunit (AP2B1), 2, mRNA.                                   |
| ATL3      | -2.01 | -1.4  | NM_015459.3    | Homo sapiens atlastin 3 (ATL3), mRNA.                                                                              |
| GART      | -2.01 | -1.47 | NM_000819.3    | Homo sapiens phosphoribosylglycinamide formyltransferase, phosphoribosylglycinamide synthetase                     |
| NUDT3     | -2.01 | -1.41 | NM_006703.2    | Homo sapiens nudix (nucleoside diphosphate linked moiety X)-type motif 3 (NUDT3), mRNA.                            |
| RBBP9     | -2.01 | -1.35 | NM_006606.2    | Homo sapiens retinoblastoma binding protein 9 (RBBP9), mRNA.                                                       |
| C11orf51  | -2.01 | -1.36 | NM_014042.1    | Homo sapiens chromosome 11 open reading frame 51 (C11orf51), mRNA.                                                 |
|           | -2.01 | -1.32 | AK126342       | Homo sapiens cDNA FLJ44370 fis, clone TRACH3008902                                                                 |
| EXOC6     | -2    | -1.35 | NM_019053.3    | Homo sapiens exocyst complex component 6 (EXOC6), 1, mRNA.                                                         |
| UBA2      | -2    | -1.32 | NM_005499.2    | Homo sapiens ubiquitin-like modifier activating enzyme 2 (UBA2), mRNA.                                             |
| RPUSD4    | -2    | -1.45 | NM_032795.1    | Homo sapiens RNA pseudouridylate synthase domain containing 4 (RPUSD4), mRNA.                                      |
| RFX5      | -2    | -1.45 | NM_001025603.1 | Homo sapiens regulatory factor X, 5 (influences HLA class II expression) (RFX5), 2, mRNA.                          |
| ZNF556    | -2    | -1.29 | NM_024967.1    | Homo sapiens zinc finger protein 556 (ZNF556), mRNA.                                                               |
| ZNF148    | -2    | -1.41 | NM_021964.1    | Homo sapiens zinc finger protein 148 (ZNF148), mRNA.                                                               |
| ZCCHC14   | -2    | -1.36 | NM_015144.2    | Homo sapiens zinc finger, CCHC domain containing 14 (ZCCHC14), mRNA.                                               |
| TBC1D2B   | -2    | -1.37 | NM_015079.2    | Homo sapiens TBC1 domain family, member 2B (TBC1D2B), mRNA.                                                        |

|          |       |       |                |                                                                                                        |
|----------|-------|-------|----------------|--------------------------------------------------------------------------------------------------------|
| HEBP1    | -2    | -1.4  | NM_015987.3    | Homo sapiens heme binding protein 1 (HEBP1), mRNA.                                                     |
| HNRPUL2  | -2    | -1.34 | XM_938301.1    | PREDICTED: Homo sapiens heterogeneous nuclear ribonucleoprotein U-like 2 (HNRPUL2), mRNA.              |
| MRPL42   | -2    | -1.34 | NM_172177.1    | Homo sapiens mitochondrial ribosomal protein L42 (MRPL42),                                             |
| PTCD2    | -2    | -1.36 | NM_024754.3    | Homo sapiens pentatricopeptide repeat domain 2 (PTCD2), mRNA.                                          |
| MYNN     | -1.99 | -1.34 | NM_018657.3    | Homo sapiens myoneurin (MYNN), mRNA.                                                                   |
| ATPAF1   | -1.99 | -1.38 | NM_022745.3    | Homo sapiens ATP synthase mitochondrial F1 complex assembly factor 1 (ATPAF1)                          |
| ZC3H8    | -1.99 | -1.33 | NM_032494.1    | Homo sapiens zinc finger CCCH-type containing 8 (ZC3H8), mRNA.                                         |
| CYorf15A | -1.99 | -1.31 | NM_001005852.2 | Homo sapiens chromosome Y open reading frame 15A (CYorf15A), mRNA.                                     |
| EHBP1    | -1.99 | -1.4  | NM_015252.2    | Homo sapiens EH domain binding protein 1 (EHBP1), mRNA.                                                |
| ODF2     | -1.99 | -1.3  | NM_002540.3    | Homo sapiens outer dense fiber of sperm tails 2 (ODF2), 1, mRNA.                                       |
| RSBN1L   | -1.99 | -1.31 | NM_198467.1    | Homo sapiens round spermatid basic protein 1-like (RSBN1L), mRNA.                                      |
| OSBPL1A  | -1.98 | -1.39 | NM_080597.2    | Homo sapiens oxysterol binding protein-like 1A (OSBPL1A), OSBPL1B, mRNA.                               |
| STAU2    | -1.98 | -1.33 | NM_014393.1    | Homo sapiens staufen, RNA binding protein, homolog 2 (Drosophila) (STAU2), mRNA.                       |
| DIP2A    | -1.98 | -1.33 | NM_206890.1    | Homo sapiens DIP2 disco-interacting protein 2 homolog A (Drosophila) (DIP2A), 3, mRNA.                 |
| SLBP     | -1.98 | -1.38 | NM_006527.2    | Homo sapiens stem-loop binding protein (SLBP), mRNA.                                                   |
| DOCK7    | -1.98 | -1.42 | NM_033407.2    | Homo sapiens dedicator of cytokinesis 7 (DOCK7), mRNA.                                                 |
| P15RS    | -1.98 | -1.41 | NM_018170.2    | Homo sapiens hypothetical protein FLJ10656 (P15RS), mRNA.                                              |
| NIPA1    | -1.98 | -1.36 | NM_144599.3    | Homo sapiens non imprinted in Prader-Willi/Angelman syndrome 1 (NIPA1), mRNA.                          |
| NUP107   | -1.97 | -1.42 | NM_020401.2    | Homo sapiens nucleoporin 107kDa (NUP107), mRNA.                                                        |
| RBL1     | -1.97 | -1.29 | NM_002895.2    | Homo sapiens retinoblastoma-like 1 (p107) (RBL1), 1, mRNA.                                             |
| MRPL35   | -1.97 | -1.39 | NM_016622.2    | Homo sapiens mitochondrial ribosomal protein L35 (MRPL35),                                             |
| DCLRE1A  | -1.97 | -1.34 | NM_014881.2    | Homo sapiens DNA cross-link repair 1A (PSO2 homolog, S. cerevisiae) (DCLRE1A), mRNA.                   |
| LPCAT2   | -1.97 | -1.31 | NM_017839.3    | Homo sapiens lysophosphatidylcholine acyltransferase 2 (LPCAT2), mRNA.                                 |
| PAPD5    | -1.97 | -1.36 | NM_001040285.1 | Homo sapiens PAP associated domain containing 5 (PAPD5), 2, mRNA.                                      |
| PARVB    | -1.97 | -1.39 | NM_013327.3    | Homo sapiens parvin, beta (PARVB), 2, mRNA.                                                            |
| SLC25A23 | -1.96 | -1.43 | NM_024103.2    | Homo sapiens solute carrier family 25 (mitochondrial carrier; phosphate carrier), member 23 (SLC25A23) |
| SMAD5    | -1.96 | -1.41 | NM_005903.5    | Homo sapiens SMAD family member 5 (SMAD5), 1, mRNA.                                                    |
| NOL5A    | -1.96 | -1.46 | NM_006392.2    | Homo sapiens nucleolar protein 5A (56kDa with KKE/D repeat) (NOL5A), mRNA.                             |
| PHF23    | -1.96 | -1.36 | NM_024297.2    | Homo sapiens PHD finger protein 23 (PHF23), mRNA.                                                      |
| TIMELESS | -1.96 | -1.41 | NM_003920.2    | Homo sapiens timeless homolog (Drosophila) (TIMELESS), mRNA.                                           |
| DTWD1    | -1.96 | -1.33 | NM_020234.4    | Homo sapiens DTW domain containing 1 (DTWD1), mRNA.                                                    |
|          | -1.96 | -1.28 | AA345637       | EST51770 Gall bladder I Homo sapiens cDNA 5 end, mRNA sequence                                         |
| SKIV2L2  | -1.96 | -1.42 | NM_015360.3    | Homo sapiens superkiller viralicidic activity 2-like 2 (S. cerevisiae) (SKIV2L2), mRNA.                |
| LAT1-3TM | -1.96 | -1.3  | XR_001385.1    | PREDICTED: Homo sapiens SLC7A5 pseudogene, 2 (LAT1-3TM), misc RNA.                                     |
| C21orf66 | -1.95 | -1.4  | NM_016631.3    | Homo sapiens chromosome 21 open reading frame 66 (C21orf66), 1, mRNA.                                  |
| ZNF696   | -1.95 | -1.34 | NM_030895.1    | Homo sapiens zinc finger protein 696 (ZNF696), mRNA.                                                   |
| QSOX2    | -1.95 | -1.35 | NM_181701.3    | Homo sapiens quiescinc Q6 sulfhydryl oxidase 2 (QSOX2), mRNA.                                          |
| CNOT1    | -1.95 | -1.29 | NM_206999.1    | Homo sapiens CCR4-NOT transcription complex, subunit 1 (CNOT1), 2, mRNA.                               |
| DHX40    | -1.95 | -1.33 | NM_024612.3    | Homo sapiens DEAH (Asp-Glu-Ala-His) box polypeptide 40 (DHX40), mRNA.                                  |
| BMI1     | -1.94 | -1.43 | NM_005180.5    | Homo sapiens BMI1 polycomb ring finger oncogene (BMI1), mRNA.                                          |
| SFRS7    | -1.94 | -1.38 | NM_001031684.1 | Homo sapiens splicing factor, arginine/serine-rich 7, 35kDa (SFRS7), mRNA.                             |
| HOXA10   | -1.94 | -1.33 | NM_018951.3    | Homo sapiens homeobox A10 (HOXA10), 1, mRNA.                                                           |
| SCML1    | -1.94 | -1.38 | NM_001037540.1 | Homo sapiens sex comb on midleg-like 1 (Drosophila) (SCML1), 1, mRNA.                                  |
| HOMER1   | -1.94 | -1.3  | NM_004272.3    | Homo sapiens homer homolog 1 (Drosophila) (HOMER1), mRNA.                                              |
| VPS13A   | -1.94 | -1.33 | NM_001018038.1 | Homo sapiens vacuolar protein sorting 13 homolog A (S. cerevisiae) (VPS13A), D, mRNA.                  |
| NUP85    | -1.94 | -1.43 | NM_024844.3    | Homo sapiens nucleoporin 85kDa (NUP85), mRNA.                                                          |
| YDJC     | -1.94 | -1.37 | NM_001017964.1 | Homo sapiens YdjC homolog (bacterial) (YDJC), mRNA.                                                    |
| PTCD2    | -1.94 | -1.3  | NM_024754.2    | Homo sapiens pentatricopeptide repeat domain 2 (PTCD2), mRNA.                                          |
| MYO19    | -1.94 | -1.28 | NM_025109.4    | Homo sapiens myosin XIX (MYO19), 1, mRNA.                                                              |

|            |       |       |                |                                                                                                         |
|------------|-------|-------|----------------|---------------------------------------------------------------------------------------------------------|
| POLE4      | -1.94 | -1.44 | NM_019896.2    | Homo sapiens polymerase (DNA-directed), epsilon 4 (p12 subunit) (POLE4), mRNA.                          |
| IQCK       | -1.94 | -1.33 | NM_153208.1    | Homo sapiens IQ motif containing K (IQCK), mRNA.                                                        |
| ADNP       | -1.93 | -1.38 | NM_181442.1    | Homo sapiens activity-dependent neuroprotector homeobox (ADNP), 2, mRNA.                                |
| MRRF       | -1.93 | -1.37 | NM_138777.2    | Homo sapiens mitochondrial ribosome recycling factor (MRRF),                                            |
| RFC4       | -1.93 | -1.42 | NM_181573.1    | Homo sapiens replication factor C (activator 1) 4, 37kDa (RFC4), 2, mRNA.                               |
| DDX46      | -1.93 | -1.35 | NM_014829.2    | Homo sapiens DEAD (Asp-Glu-Ala-Asp) box polypeptide 46 (DDX46), mRNA.                                   |
| NEK1       | -1.93 | -1.31 | NM_012224.1    | Homo sapiens NIMA (never in mitosis gene a)-related kinase 1 (NEK1), mRNA.                              |
| PDS5B      | -1.93 | -1.34 | NM_015032.1    | Homo sapiens PDS5, regulator of cohesion maintenance, homolog B ( <i>S. cerevisiae</i> ) (PDS5B), mRNA. |
| TNNC1      | -1.93 | -1.31 | NM_003280.1    | Homo sapiens troponin C type 1 (slow) (TNNC1), mRNA.                                                    |
| C16orf24   | -1.93 | -1.38 | NM_023933.1    | Homo sapiens chromosome 16 open reading frame 24 (C16orf24), mRNA.                                      |
| HCFC2      | -1.93 | -1.29 | NM_013320.1    | Homo sapiens host cell factor C2 (HCFC2), mRNA.                                                         |
| SCMH1      | -1.92 | -1.34 | NM_001031694.1 | Homo sapiens sex comb on midleg homolog 1 ( <i>Drosophila</i> ) (SCMH1), 1, mRNA.                       |
| PTPN2      | -1.92 | -1.28 | NM_002828.2    | Homo sapiens protein tyrosine phosphatase, non-receptor type 2 (PTPN2), 1, mRNA.                        |
| KPNA3      | -1.92 | -1.35 | NM_002267.2    | Homo sapiens karyopherin alpha 3 (importin alpha 4) (KPNA3), mRNA.                                      |
| TACC1      | -1.92 | -1.37 | NM_006283.1    | Homo sapiens transforming, acidic coiled-coil containing protein 1 (TACC1), mRNA.                       |
| C9orf40    | -1.92 | -1.33 | NM_017998.1    | Homo sapiens chromosome 9 open reading frame 40 (C9orf40), mRNA.                                        |
| RCL1       | -1.92 | -1.36 | NM_005772.2    | Homo sapiens RNA terminal phosphate cyclase-like 1 (RCL1), mRNA.                                        |
| GARNL1     | -1.92 | -1.34 | NM_194301.2    | Homo sapiens GTPase activating Rap/RanGAP domain-like 1 (GARNL1), 2, mRNA.                              |
| TBL1X      | -1.91 | -1.4  | NM_005647.2    | Homo sapiens transducin (beta)-like 1X-linked (TBL1X), mRNA.                                            |
| PRKAR1B    | -1.91 | -1.31 | NM_002735.1    | Homo sapiens protein kinase, cAMP-dependent, regulatory, type I, beta (PRKAR1B), mRNA.                  |
| DIP2B      | -1.91 | -1.42 | NM_173602.2    | Homo sapiens DIP2 disco-interacting protein 2 homolog B ( <i>Drosophila</i> ) (DIP2B), mRNA.            |
| CHN2       | -1.91 | -1.28 | NM_004067.2    | Homo sapiens chimerin (chimaerin) 2 (CHN2), 2, mRNA.                                                    |
|            | -1.91 | -1.37 | BC035081       | Homo sapiens cDNA clone IMAGE:5260685                                                                   |
| NOTCH2NL   | -1.91 | -1.29 | NM_203458.3    | Homo sapiens Notch homolog 2 ( <i>Drosophila</i> ) N-terminal like (NOTCH2NL), mRNA.                    |
| DDX55      | -1.91 | -1.37 | NM_020936.1    | Homo sapiens DEAD (Asp-Glu-Ala-Asp) box polypeptide 55 (DDX55), mRNA.                                   |
| DIMT1L     | -1.9  | -1.42 | NM_014473.2    | Homo sapiens DIM1 dimethyladenosine transferase 1-like ( <i>S. cerevisiae</i> ) (DIMT1L), mRNA.         |
| TCERG1     | -1.9  | -1.37 | NM_006706.3    | Homo sapiens transcription elongation regulator 1 (TCERG1), 1, mRNA.                                    |
| 11-Sep     | -1.9  | -1.36 | NM_018243.2    | Homo sapiens septin 11 (SEPT11), mRNA.                                                                  |
| DVL2       | -1.9  | -1.35 | NM_004422.2    | Homo sapiens dishevelled, dsh homolog 2 ( <i>Drosophila</i> ) (DVL2), mRNA.                             |
| NDE1       | -1.9  | -1.34 | NM_017668.1    | Homo sapiens nudE nuclear distribution gene E homolog 1 ( <i>A. nidulans</i> ) (NDE1), mRNA.            |
| FASTK      | -1.9  | -1.31 | NM_033015.2    | Homo sapiens Fas-activated serine/threonine kinase (FASTK), 4, mRNA.                                    |
| NELF       | -1.9  | -1.35 | NM_015537.3    | Homo sapiens nasal embryonic LHRH factor (NELF), mRNA.                                                  |
| CENPP      | -1.9  | -1.29 | NM_001012267.1 | Homo sapiens centromere protein P (CENPP), mRNA.                                                        |
| SSRP1      | -1.89 | -1.34 | NM_003146.2    | Homo sapiens structure specific recognition protein 1 (SSRP1), mRNA.                                    |
| NFXL1      | -1.89 | -1.34 | NM_152995.4    | Homo sapiens nuclear transcription factor, X-box binding-like 1 (NFXL1), mRNA.                          |
| SERBP1     | -1.89 | -1.44 | NM_001018069.1 | Homo sapiens SERPINE1 mRNA binding protein 1 (SERBP1), 3, mRNA.                                         |
| PTBP2      | -1.89 | -1.35 | NM_021190.1    | Homo sapiens polypyrimidine tract binding protein 2 (PTBP2), mRNA.                                      |
| ANKRD27    | -1.89 | -1.31 | NM_032139.2    | Homo sapiens ankyrin repeat domain 27 (VPS9 domain) (ANKRD27), mRNA.                                    |
| ORC6L      | -1.89 | -1.38 | NM_014321.2    | Homo sapiens origin recognition complex, subunit 6 like (yeast) (ORC6L), mRNA.                          |
| ARID4B     | -1.89 | -1.33 | NM_016374.5    | Homo sapiens AT rich interactive domain 4B (RBP1-like) (ARID4B), 1, mRNA.                               |
| LONP2      | -1.89 | -1.28 | NM_031490.2    | Homo sapiens lon peptidase 2, peroxisomal (LONP2), mRNA.                                                |
| MRPS27     | -1.89 | -1.42 | NM_015084.1    | Homo sapiens mitochondrial ribosomal protein S27 (MRPS27), mRNA.                                        |
| FCHSD2     | -1.89 | -1.29 | NM_014824.1    | Homo sapiens FCH and double SH3 domains 2 (FCHSD2), mRNA.                                               |
| LOC145853  | -1.89 | -1.35 | XM_096885.9    | PREDICTED: Homo sapiens hypothetical LOC145853 (LOC145853), mRNA.                                       |
| CDC25C     | -1.88 | -1.29 | NM_022809.2    | Homo sapiens cell division cycle 25 homolog C ( <i>S. pombe</i> ) (CDC25C), 2, mRNA.                    |
| NOP5/NOP58 | -1.88 | -1.4  | NM_015934.3    | Homo sapiens nucleolar protein NOP5/NOP58 (NOP5/NOP58), mRNA.                                           |
| C3orf31    | -1.88 | -1.38 | NM_138807.2    | Homo sapiens chromosome 3 open reading frame 31 (C3orf31), mRNA.                                        |
| PRR6       | -1.88 | -1.42 | NM_181716.2    | Homo sapiens proline rich 6 (PRR6), mRNA.                                                               |
| HK1        | -1.88 | -1.39 | NM_033500.1    | Homo sapiens hexokinase 1 (HK1), 5, mRNA.                                                               |

|           |       |       |                |                                                                                                       |
|-----------|-------|-------|----------------|-------------------------------------------------------------------------------------------------------|
| TUSC4     | -1.88 | -1.39 | NM_006545.4    | Homo sapiens tumor suppressor candidate 4 (TUSC4), mRNA.                                              |
| RAB24     | -1.88 | -1.35 | NM_001031677.2 | Homo sapiens RAB24, member RAS oncogene family (RAB24), 1, mRNA.                                      |
| TMEM123   | -1.88 | -1.37 | NM_052932.2    | Homo sapiens transmembrane protein 123 (TMEM123), mRNA.                                               |
| REEP5     | -1.88 | -1.4  | NM_005669.4    | Homo sapiens receptor accessory protein 5 (REEP5), mRNA.                                              |
| DTL       | -1.88 | -1.34 | NM_016448.1    | Homo sapiens denticleless homolog (Drosophila) (DTL), mRNA.                                           |
|           | -1.88 | -1.28 | BG120325       | 602353719F1 NIH_MGC_90 Homo sapiens cDNA clone IMAGE:4451716 5, mRNA sequence                         |
| RCCD1     | -1.88 | -1.28 | NM_001017919.1 | Homo sapiens RCC1 domain containing 1 (RCCD1), 2, mRNA.                                               |
| RNF212    | -1.88 | -1.27 | NM_194439.1    | Homo sapiens ring finger protein 212 (RNF212), mRNA.                                                  |
| PHF3      | -1.87 | -1.41 | NM_015153.1    | Homo sapiens PHD finger protein 3 (PHF3), mRNA.                                                       |
| HNRNPC    | -1.87 | -1.4  | NM_001077442.1 | Homo sapiens heterogeneous nuclear ribonucleoprotein C (C1/C2) (HNRNPC), 3, mRNA.                     |
| PKD2      | -1.87 | -1.32 | NM_000297.2    | Homo sapiens polycystic kidney disease 2 (autosomal dominant) (PKD2), mRNA.                           |
| ZCCHC8    | -1.87 | -1.32 | NM_017612.2    | Homo sapiens zinc finger, CCHC domain containing 8 (ZCCHC8), mRNA.                                    |
| TMTC4     | -1.87 | -1.28 | NM_001079669.1 | Homo sapiens transmembrane and tetratricopeptide repeat containing 4 (TMTC4), 2, mRNA.                |
| FAM35A    | -1.87 | -1.32 | NM_019054.2    | Homo sapiens family with sequence similarity 35, member A (FAM35A), mRNA.                             |
| WDFY1     | -1.87 | -1.36 | NM_020830.3    | Homo sapiens WD repeat and FYVE domain containing 1 (WDFY1), mRNA.                                    |
| KIAA0101  | -1.87 | -1.47 | NM_014736.4    | Homo sapiens KIAA0101 (KIAA0101), 1, mRNA.                                                            |
| UCHL5     | -1.86 | -1.41 | NM_015984.2    | Homo sapiens ubiquitin carboxyl-terminal hydrolase L5 (UCHL5), mRNA.                                  |
| C1orf19   | -1.86 | -1.35 | NM_052965.1    | Homo sapiens chromosome 1 open reading frame 19 (C1orf19), mRNA.                                      |
| RASIP1    | -1.86 | -1.43 | NM_017805.2    | Homo sapiens Ras interacting protein 1 (RASIP1), mRNA.                                                |
| APH1A     | -1.86 | -1.32 | NM_001077628.1 | Homo sapiens anterior pharynx defective 1 homolog A (C. elegans) (APH1A), 1, mRNA.                    |
| ENOSF1    | -1.86 | -1.38 | NM_017512.2    | Homo sapiens enolase superfamily member 1 (ENOSF1), mRNA.                                             |
| TMEM194   | -1.86 | -1.32 | NM_015257.1    | Homo sapiens transmembrane protein 194 (TMEM194), mRNA.                                               |
| C5orf39   | -1.86 | -1.28 | NM_001014279.1 | Homo sapiens chromosome 5 open reading frame 39 (C5orf39), mRNA.                                      |
| RNF138    | -1.86 | -1.28 | NM_016271.3    | Homo sapiens ring finger protein 138 (RNF138), 1, mRNA.                                               |
| LAS1L     | -1.86 | -1.36 | NM_031206.3    | Homo sapiens LAS1-like (S. cerevisiae) (LAS1L), mRNA.                                                 |
| FBXO18    | -1.85 | -1.37 | NM_178150.1    | Homo sapiens F-box protein, helicase, 18 (FBXO18), 2, mRNA.                                           |
| TNPO2     | -1.85 | -1.39 | NM_013433.3    | Homo sapiens transportin 2 (importin 3, karyopherin beta 2b) (TNPO2), mRNA.                           |
| HMG2      | -1.85 | -1.28 | NM_005517.3    | Homo sapiens high-mobility group nucleosomal binding domain 2 (HMG2), mRNA.                           |
| ANKRD57   | -1.85 | -1.39 | NM_023016.3    | Homo sapiens ankyrin repeat domain 57 (ANKRD57), mRNA.                                                |
| C5orf24   | -1.85 | -1.29 | NM_152409.2    | Homo sapiens chromosome 5 open reading frame 24 (C5orf24), mRNA.                                      |
| CTDSP2    | -1.85 | -1.29 | NM_016396.1    | Homo sapiens CTD (carboxy-terminal domain, RNA polymerase II, polypeptide A) small phosphatase like 2 |
| DIS3L     | -1.85 | -1.34 | NM_133375.2    | Homo sapiens DIS3 mitotic control homolog (S. cerevisiae)-like (DIS3L), mRNA.                         |
| CNOT1     | -1.85 | -1.42 | NM_016284.3    | Homo sapiens CCR4-NOT transcription complex, subunit 1 (CNOT1), 1, mRNA.                              |
| DHX15     | -1.84 | -1.47 | NM_001358.2    | Homo sapiens DEAH (Asp-Glu-Ala-His) box polypeptide 15 (DHX15), mRNA.                                 |
| CNIH      | -1.84 | -1.38 | NM_001009551.1 | Homo sapiens cornichon homolog (Drosophila) (CNIH), 2, mRNA.                                          |
|           | -1.84 | -1.38 | BC038512       | Homo sapiens cDNA clone IMAGE:5262734                                                                 |
| TCP1      | -1.83 | -1.3  | NM_030752.2    | Homo sapiens t-complex 1 (TCP1), 1, mRNA.                                                             |
| TUBGCP3   | -1.83 | -1.26 | NM_006322.3    | Homo sapiens tubulin, gamma complex associated protein 3 (TUBGCP3), mRNA.                             |
| FAHD1     | -1.83 | -1.35 | NM_001018104.1 | Homo sapiens fumarylacetoacetate hydrolase domain containing 1 (FAHD1)                                |
| TIA1      | -1.83 | -1.35 | NM_022173.1    | Homo sapiens TIA1 cytotoxic granule-associated RNA binding protein (TIA1), 2, mRNA.                   |
| TP53BP2   | -1.83 | -1.34 | NM_001031685.2 | Homo sapiens tumor protein p53 binding protein, 2 (TP53BP2), 1, mRNA.                                 |
| TMEM126B  | -1.83 | -1.42 | NM_018480.2    | Homo sapiens transmembrane protein 126B (TMEM126B), mRNA.                                             |
| C14orf122 | -1.83 | -1.28 | NM_016049.3    | Homo sapiens chromosome 14 open reading frame 122 (C14orf122), mRNA.                                  |
| CLUAP1    | -1.83 | -1.32 | NM_015041.1    | Homo sapiens clusterin associated protein 1 (CLUAP1), 1, mRNA.                                        |
| PRMT6     | -1.83 | -1.38 | NM_018137.1    | Homo sapiens protein arginine methyltransferase 6 (PRMT6), mRNA.                                      |
| ACTR1B    | -1.83 | -1.33 | NM_005735.2    | Homo sapiens ARP1 actin-related protein 1 homolog B, contractin beta (yeast) (ACTR1B), mRNA.          |
| GNB5      | -1.82 | -1.3  | NM_006578.3    | Homo sapiens guanine nucleotide binding protein (G protein), beta 5 (GNB5), 1, mRNA.                  |
| MPP6      | -1.82 | -1.34 | NM_016447.2    | Homo sapiens membrane protein, palmitoylated 6 (MAGUK p55 subfamily member 6) (MPP6), mRNA.           |
| SMC3      | -1.82 | -1.28 | NM_005445.3    | Homo sapiens structural maintenance of chromosomes 3 (SMC3), mRNA.                                    |



|          |       |                      |                                                                                                         |
|----------|-------|----------------------|---------------------------------------------------------------------------------------------------------|
| RAE1     | -1.82 | -1.28 NM_003610.3    | Homo sapiens RAE1 RNA export 1 homolog (S. pombe) (RAE1), 1, mRNA.                                      |
| SLC27A2  | -1.82 | -1.32 NM_003645.2    | Homo sapiens solute carrier family 27 (fatty acid transporter), member 2 (SLC27A2), mRNA.               |
| NFKB1    | -1.82 | -1.4 NM_003998.2     | Homo sapiens nuclear factor of kappa light polypeptide gene enhancer in B-cells 1 (p105) (NFKB1), mRNA. |
| CRTC2    | -1.82 | -1.28 NM_181715.1    | Homo sapiens CREB regulated transcription coactivator 2 (CRTC2), mRNA.                                  |
| PPIL5    | -1.82 | -1.33 NM_152329.3    | Homo sapiens peptidylprolyl isomerase (cyclophilin)-like 5 (PPIL5), 1, mRNA.                            |
| USP3     | -1.81 | -1.37 NM_006537.2    | Homo sapiens ubiquitin specific peptidase 3 (USP3), mRNA.                                               |
| CDC25C   | -1.81 | -1.26 NM_001790.3    | Homo sapiens cell division cycle 25 homolog C (S. pombe) (CDC25C), 1, mRNA.                             |
| ZNF337   | -1.81 | -1.3 NM_015655.2     | Homo sapiens zinc finger protein 337 (ZNF337), mRNA.                                                    |
| SYTL4    | -1.81 | -1.27 NM_080737.1    | Homo sapiens synaptotagmin-like 4 (granuphilin-a) (SYTL4), mRNA.                                        |
| FZD9     | -1.81 | -1.3 NM_003508.2     | Homo sapiens frizzled homolog 9 (Drosophila) (FZD9), mRNA.                                              |
| SPRY1    | -1.81 | -1.28 NM_199327.1    | Homo sapiens sprouty homolog 1, antagonist of FGF signaling (Drosophila) (SPRY1), 2, mRNA.              |
| WRN      | -1.81 | -1.33 NM_000553.3    | Homo sapiens Werner syndrome (WRN), mRNA.                                                               |
| COPS3    | -1.81 | -1.44 NM_003653.2    | Homo sapiens COP9 constitutive photomorphogenic homolog subunit 3 (Arabidopsis) (COPS3), mRNA.          |
| DPP7     | -1.81 | -1.32 NM_013379.2    | Homo sapiens dipeptidyl-peptidase 7 (DPP7), mRNA.                                                       |
| FAM53A   | -1.8  | -1.27 NM_001013622.2 | Homo sapiens family with sequence similarity 53, member A (FAM53A), mRNA.                               |
|          | -1.8  | -1.39 AK024986       | Homo sapiens cDNA: FLJ21333 fis, clone COL02535                                                         |
| C8orf53  | -1.8  | -1.3 NM_032334.1     | Homo sapiens chromosome 8 open reading frame 53 (C8orf53), mRNA.                                        |
| ANKRD36  | -1.8  | -1.26 NM_198555.3    | Homo sapiens ankyrin repeat domain 36 (ANKRD36), mRNA.                                                  |
| NIN      | -1.8  | -1.26 NM_182945.1    | Homo sapiens ninein (GSK3B interacting protein) (NIN), 3, mRNA.                                         |
| THAP11   | -1.8  | -1.4 NM_020457.2     | Homo sapiens THAP domain containing 11 (THAP11), mRNA.                                                  |
| MANBAL   | -1.8  | -1.35 NM_001003897.1 | Homo sapiens mannosidase, beta A, lysosomal-like (MANBAL), 2, mRNA.                                     |
| COPS2    | -1.79 | -1.31 NM_004236.2    | Homo sapiens COP9 constitutive photomorphogenic homolog subunit 2 (Arabidopsis) (COPS2), mRNA.          |
| DENND4A  | -1.79 | -1.28 NM_005848.2    | Homo sapiens DENN/MADD domain containing 4A (DENND4A), mRNA.                                            |
| MOCOS    | -1.79 | -1.39 NM_017947.1    | Homo sapiens molybdenum cofactor sulfurase (MOCOS), mRNA.                                               |
| ME2      | -1.79 | -1.36 NM_002396.3    | Homo sapiens malic enzyme 2, NAD(+)-dependent, mitochondrial (ME2)                                      |
| TAP2     | -1.79 | -1.25 NM_018833.2    | Homo sapiens transporter 2, ATP-binding cassette, sub-family B (MDR/TAP) (TAP2), 2, mRNA.               |
| GNG10    | -1.79 | -1.31 NM_001017998.2 | Homo sapiens guanine nucleotide binding protein (G protein), gamma 10 (GNG10), mRNA.                    |
| SMC6     | -1.79 | -1.31 NM_024624.4    | Homo sapiens structural maintenance of chromosomes 6 (SMC6), mRNA.                                      |
| TXLNA    | -1.79 | -1.42 NM_175852.3    | Homo sapiens taxilin alpha (TXLNA), mRNA.                                                               |
| CD44     | -1.79 | -1.4 NM_001001391.1  | Homo sapiens CD44 molecule (Indian blood group) (CD44), 4, mRNA.                                        |
| PSD3     | -1.79 | -1.28 NM_015310.3    | Homo sapiens pleckstrin and Sec7 domain containing 3 (PSD3), 1, mRNA.                                   |
| CCDC41   | -1.79 | -1.29 NM_016122.2    | Homo sapiens coiled-coil domain containing 41 (CCDC41), 1, mRNA.                                        |
| POLR3H   | -1.78 | -1.34 NM_001018052.1 | Homo sapiens polymerase (RNA) III (DNA directed) polypeptide H (22.9kD) (POLR3H), 2, mRNA.              |
| CKAP5    | -1.78 | -1.4 NM_001008938.1  | Homo sapiens cytoskeleton associated protein 5 (CKAP5), 1, mRNA.                                        |
| ELAVL1   | -1.78 | -1.29 NM_001419.2    | Homo sapiens ELAV (embryonic lethal, abnormal vision, Drosophila)-like 1 (Hu antigen R) (ELAVL1), mRNA. |
| MMS19L   | -1.78 | -1.36 NM_022362.2    | Homo sapiens MMS19-like (MET18 homolog, S. cerevisiae) (MMS19L), mRNA.                                  |
| RPS6KA1  | -1.78 | -1.3 NM_002953.3     | Homo sapiens ribosomal protein S6 kinase, 90kDa, polypeptide 1 (RPS6KA1), 1, mRNA.                      |
| MCCC1    | -1.78 | -1.34 NM_020166.3    | Homo sapiens methylcrotonoyl-Coenzyme A carboxylase 1 (alpha) (MCCC1), mRNA.                            |
| DNM1L    | -1.78 | -1.38 NM_012062.2    | Homo sapiens dynamin 1-like (DNM1L), 1, mRNA.                                                           |
| PMS2     | -1.78 | -1.29 NR_003085.1    | Homo sapiens PMS2 postmeiotic segregation increased 2 (S. cerevisiae) (PMS2), 2, transcribed RNA.       |
| HIST1H4K | -1.78 | -1.28 NM_003541.2    | Homo sapiens histone cluster 1, H4k (HIST1H4K), mRNA.                                                   |
| MRPS27   | -1.78 | -1.39 NM_015084.1    | Homo sapiens mitochondrial ribosomal protein S27 (MRPS27), mRNA.                                        |
| MATR3    | -1.78 | -1.26 NM_199189.1    | Homo sapiens matrin 3 (MATR3), 1, mRNA.                                                                 |
| PSMA2    | -1.77 | -1.35 NM_002787.3    | Homo sapiens proteasome (prosome, macropain) subunit, alpha type, 2 (PSMA2), mRNA.                      |
| SMARCA4  | -1.77 | -1.41 NM_003072.2    | Homo sapiens SWI/SNF related, matrix associated, actin dependent regulator of chromatin                 |
| PLCG1    | -1.77 | -1.26 NM_182811.1    | Homo sapiens phospholipase C, gamma 1 (PLCG1), 2, mRNA.                                                 |
| RAB10    | -1.76 | -1.41 NM_016131.3    | Homo sapiens RAB10, member RAS oncogene family (RAB10), mRNA.                                           |
| FAM13A1  | -1.76 | -1.26 NM_014883.2    | Homo sapiens family with sequence similarity 13, member A1 (FAM13A1), 1, mRNA.                          |
| ANKRD36B | -1.76 | -1.26 NM_025190.2    | Homo sapiens ankyrin repeat domain 36B (ANKRD36B), mRNA.                                                |

|          |       |       |                |                                                                                            |
|----------|-------|-------|----------------|--------------------------------------------------------------------------------------------|
| LOC81691 | -1.76 | -1.28 | NM_030941.1    | Homo sapiens exonuclease NEF-sp (LOC81691), mRNA.                                          |
| KIAA1641 | -1.76 | -1.25 | XM_944061.1    | PREDICTED: Homo sapiens KIAA1641, 7 (KIAA1641), mRNA.                                      |
| MARK1    | -1.75 | -1.26 | NM_018650.3    | Homo sapiens MAP/microtubule affinity-regulating kinase 1 (MARK1), mRNA.                   |
| NP       | -1.75 | -1.37 | NM_000270.1    | Homo sapiens nucleoside phosphorylase (NP), mRNA.                                          |
| PKP4     | -1.75 | -1.31 | NM_003628.3    | Homo sapiens plakophilin 4 (PKP4), 1, mRNA.                                                |
| CEP192   | -1.75 | -1.31 | NM_032142.2    | Homo sapiens centrosomal protein 192kDa (CEP192), mRNA.                                    |
| DLEU2    | -1.75 | -1.25 | XR_001514.1    | PREDICTED: Homo sapiens deleted in lymphocytic leukemia, 2 (DLEU2), misc RNA.              |
|          | -1.75 | -1.24 | AJ227862       | Homo sapiens partial mRNA; ID YG39-1C                                                      |
| VAMP4    | -1.74 | -1.27 | NM_201994.1    | Homo sapiens vesicle-associated membrane protein 4 (VAMP4), 1, mRNA.                       |
| P15RS    | -1.74 | -1.33 | NM_018170.3    | Homo sapiens cyclin-dependent kinase 2B-inhibitor-related protein (P15RS), mRNA.           |
| C13orf34 | -1.74 | -1.31 | NM_024808.2    | Homo sapiens chromosome 13 open reading frame 34 (C13orf34), mRNA.                         |
| UBE2D2   | -1.73 | -1.24 | NM_003339.2    | Homo sapiens ubiquitin-conjugating enzyme E2D 2 (UBC4/5 homolog, yeast) (UBE2D2), 1, mRNA. |
| NUP54    | -1.73 | -1.35 | NM_017426.2    | Homo sapiens nucleoporin 54kDa (NUP54), mRNA.                                              |
| IRX3     | -1.73 | -1.41 | NM_024336.1    | Homo sapiens iroquois homeobox 3 (IRX3), mRNA.                                             |
| GRPEL2   | -1.73 | -1.36 | NM_152407.3    | Homo sapiens GrpE-like 2, mitochondrial (E. coli) (GRPEL2), mRNA.                          |
| RPL13A   | -1.73 | -1.41 | NM_012423.2    | Homo sapiens ribosomal protein L13a (RPL13A), mRNA.                                        |
| LAMB1    | -1.73 | -1.29 | NM_002291.1    | Homo sapiens laminin, beta 1 (LAMB1), mRNA.                                                |
| C9orf78  | -1.73 | -1.39 | NM_016520.2    | Homo sapiens chromosome 9 open reading frame 78 (C9orf78), mRNA.                           |
| PIAS2    | -1.73 | -1.25 | XM_938229.1    | PREDICTED: Homo sapiens protein inhibitor of activated STAT, 2 (PIAS2), mRNA.              |
| KIAA0020 | -1.73 | -1.37 | NM_014878.4    | Homo sapiens KIAA0020 (KIAA0020), mRNA.                                                    |
| FOXL2    | -1.73 | -1.27 | XM_001131060.1 | PREDICTED: Homo sapiens forkhead box L2 (FOXL2), mRNA.                                     |
| FEN1     | -1.72 | -1.4  | NM_004111.4    | Homo sapiens flap structure-specific endonuclease 1 (FEN1), mRNA.                          |
| SUMO3    | -1.72 | -1.4  | NM_006936.2    | Homo sapiens SMT3 suppressor of mif two 3 homolog 3 (S. cerevisiae) (SUMO3), mRNA.         |
| NUP88    | -1.72 | -1.41 | NM_002532.3    | Homo sapiens nucleoporin 88kDa (NUP88), mRNA.                                              |
| SNRK     | -1.72 | -1.32 | NM_017719.3    | Homo sapiens SNF related kinase (SNRK), mRNA.                                              |
| EPGN     | -1.72 | -1.28 | NM_001013442.1 | Homo sapiens epithelial mitogen homolog (mouse) (EPGN), mRNA.                              |
| TOPORS   | -1.71 | -1.3  | NM_005802.2    | Homo sapiens topoisomerase I binding, arginine/serine-rich (TOPORS), mRNA.                 |
| IPO8     | -1.71 | -1.31 | NM_006390.2    | Homo sapiens importin 8 (IPO8), mRNA.                                                      |
| TYMS     | -1.71 | -1.42 | NM_001071.1    | Homo sapiens thymidylate synthetase (TYMS), mRNA.                                          |
| PRMT1    | -1.71 | -1.38 | NM_198319.2    | Homo sapiens protein arginine methyltransferase 1 (PRMT1), 2, mRNA.                        |
| FAM36A   | -1.71 | -1.28 | NM_198076.4    | Homo sapiens family with sequence similarity 36, member A (FAM36A), mRNA.                  |
| LIN54    | -1.71 | -1.3  | NM_194282.1    | Homo sapiens lin-54 homolog (C. elegans) (LIN54), mRNA.                                    |
| USP15    | -1.7  | -1.25 | NM_006313.1    | Homo sapiens ubiquitin specific peptidase 15 (USP15), mRNA.                                |
| UBR5     | -1.7  | -1.32 | NM_015902.4    | Homo sapiens ubiquitin protein ligase E3 component n-recognin 5 (UBR5), mRNA.              |
| HSPA14   | -1.7  | -1.36 | NM_016299.2    | Homo sapiens heat shock 70kDa protein 14 (HSPA14), 1, mRNA.                                |
| MRPS25   | -1.7  | -1.28 | NM_022497.3    | Homo sapiens mitochondrial ribosomal protein S25 (MRPS25), mRNA.                           |
| RFC4     | -1.7  | -1.37 | NM_002916.3    | Homo sapiens replication factor C (activator 1) 4, 37kDa (RFC4), 1, mRNA.                  |
| SUMF1    | -1.7  | -1.29 | NM_182760.2    | Homo sapiens sulfatase modifying factor 1 (SUMF1), mRNA.                                   |
| PDE12    | -1.7  | -1.29 | NM_177966.4    | Homo sapiens phosphodiesterase 12 (PDE12), mRNA.                                           |
| ZC3H4    | -1.7  | -1.33 | NM_015168.1    | Homo sapiens zinc finger CCCH-type containing 4 (ZC3H4), mRNA.                             |
| CTAG2    | -1.7  | -1.26 | NM_020994.2    | Homo sapiens cancer/testis antigen 2 (CTAG2), 2, mRNA.                                     |
|          | -1.7  | -1.25 | CN357235       | 17000532215901 GRN_ES Homo sapiens cDNA 5, mRNA sequence                                   |
| PPAN     | -1.69 | -1.29 | NM_020230.4    | Homo sapiens peter pan homolog (Drosophila) (PPAN), mRNA.                                  |
| EXOSC6   | -1.69 | -1.34 | NM_058219.2    | Homo sapiens exosome component 6 (EXOSC6), mRNA.                                           |
| SSX2     | -1.69 | -1.25 | NM_003147.4    | Homo sapiens synovial sarcoma, X breakpoint 2 (SSX2), 1, mRNA.                             |
| MED6     | -1.69 | -1.36 | NM_005466.2    | Homo sapiens mediator complex subunit 6 (MED6), mRNA.                                      |
| WEE1     | -1.69 | -1.3  | NM_003390.2    | Homo sapiens WEE1 homolog (S. pombe) (WEE1), mRNA.                                         |
| ATP11B   | -1.69 | -1.27 | NM_014616.1    | Homo sapiens ATPase, class VI, type 11B (ATP11B), mRNA.                                    |
| TSPAN3   | -1.69 | -1.34 | NM_005724.4    | Homo sapiens tetraspanin 3 (TSPAN3), 1, mRNA.                                              |

|           |       |                      |                                                                                                             |
|-----------|-------|----------------------|-------------------------------------------------------------------------------------------------------------|
| DNA2      | -1.69 | -1.24 NM_001080449.1 | Homo sapiens DNA replication helicase 2 homolog (yeast) (DNA2), mRNA.                                       |
| INTS9     | -1.69 | -1.29 NM_018250.1    | Homo sapiens integrator complex subunit 9 (INTS9), mRNA.                                                    |
| CDC25C    | -1.68 | -1.23 NM_001790.3    | Homo sapiens cell division cycle 25 homolog C (S. pombe) (CDC25C), 1, mRNA.                                 |
| ZNF77     | -1.68 | -1.25 NM_021217.1    | Homo sapiens zinc finger protein 77 (ZNF77), mRNA.                                                          |
| FOXRED2   | -1.68 | -1.32 NM_024955.4    | Homo sapiens FAD-dependent oxidoreductase domain containing 2 (FOXRED2), mRNA.                              |
| TMEM137   | -1.68 | -1.25 XR_017971.1    | PREDICTED: Homo sapiens transmembrane protein 137 (TMEM137), misc RNA.                                      |
| CPT1A     | -1.67 | -1.27 NM_001031847.1 | Homo sapiens carnitine palmitoyltransferase 1A (liver) (CPT1A)                                              |
| TAF4      | -1.67 | -1.31 NM_003185.3    | Homo sapiens TAF4 RNA polymerase II, TATA box binding protein (TBP)-associated factor, 135kDa (TAF4), mRNA. |
| ZFP161    | -1.67 | -1.3 NM_003409.2     | Homo sapiens zinc finger protein 161 homolog (mouse) (ZFP161), mRNA.                                        |
| RPL14     | -1.67 | -1.34 NM_001034996.1 | Homo sapiens ribosomal protein L14 (RPL14), 1, mRNA.                                                        |
| DUSP3     | -1.67 | -1.39 NM_004090.2    | Homo sapiens dual specificity phosphatase 3 (vaccinia virus phosphatase VH1-related) (DUSP3), mRNA.         |
| C17orf79  | -1.67 | -1.31 NM_018405.2    | Homo sapiens chromosome 17 open reading frame 79 (C17orf79), mRNA.                                          |
|           | -1.67 | -1.26 AK095707       | Homo sapiens cDNA FLJ38388 fis, clone FEBRA2004485                                                          |
| RSBN1     | -1.67 | -1.31 NM_018364.3    | Homo sapiens round spermatid basic protein 1 (RSBN1), mRNA.                                                 |
| WDR75     | -1.67 | -1.36 NM_032168.1    | Homo sapiens WD repeat domain 75 (WDR75), mRNA.                                                             |
| PRKCI     | -1.66 | -1.27 NM_002740.5    | Homo sapiens protein kinase C, iota (PRKCI), mRNA.                                                          |
| RAD23B    | -1.66 | -1.3 NM_002874.3     | Homo sapiens RAD23 homolog B (S. cerevisiae) (RAD23B), mRNA.                                                |
| SLC25A11  | -1.66 | -1.27 NM_003562.3    | Homo sapiens solute carrier family 25 (mitochondrial carrier; oxoglutarate carrier), member 11 (SLC25A11)   |
| MKL2      | -1.66 | -1.24 NM_014048.3    | Homo sapiens MKL/myocardin-like 2 (MKL2), mRNA.                                                             |
| HSPA1B    | -1.66 | -1.4 NM_005346.3     | Homo sapiens heat shock 70kDa protein 1B (HSPA1B), mRNA.                                                    |
| GFOD2     | -1.66 | -1.27 NM_030819.2    | Homo sapiens glucose-fructose oxidoreductase domain containing 2 (GFOD2), mRNA.                             |
| SUZ12     | -1.66 | -1.41 NM_015355.1    | Homo sapiens suppressor of zeste 12 homolog (Drosophila) (SUZ12), mRNA.                                     |
| SNIP1     | -1.66 | -1.29 NM_024700.2    | Homo sapiens Smad nuclear interacting protein 1 (SNIP1), mRNA.                                              |
| SLTM      | -1.66 | -1.32 NM_001013843.1 | Homo sapiens SAFB-like, transcription modulator (SLTM), 2, mRNA.                                            |
| NSMCE4A   | -1.66 | -1.36 NM_017615.1    | Homo sapiens non-SMC element 4 homolog A (S. cerevisiae) (NSMCE4A), mRNA.                                   |
|           | -1.66 | -1.24 BC031266       | Homo sapiens cDNA clone IMAGE:5277162                                                                       |
| TRDMT1    | -1.65 | -1.23 NM_176083.2    | Homo sapiens tRNA aspartic acid methyltransferase 1 (TRDMT1), b, mRNA.                                      |
| NR2C2     | -1.65 | -1.26 NM_003298.3    | Homo sapiens nuclear receptor subfamily 2, group C, member 2 (NR2C2), mRNA.                                 |
| AP1M1     | -1.65 | -1.33 NM_032493.2    | Homo sapiens adaptor-related protein complex 1, mu 1 subunit (AP1M1), mRNA.                                 |
| HK2       | -1.65 | -1.3 NM_000189.4     | Homo sapiens hexokinase 2 (HK2), mRNA.                                                                      |
| SAAL1     | -1.65 | -1.32 NM_138421.2    | Homo sapiens serum amyloid A-like 1 (SAAL1), mRNA.                                                          |
| LOC401089 | -1.65 | -1.25 NM_001040061.1 | Homo sapiens FLJ43329 protein (LOC401089), mRNA.                                                            |
| BBS7      | -1.64 | -1.24 NM_176824.1    | Homo sapiens Bardet-Biedl syndrome 7 (BBS7), 1, mRNA.                                                       |
| TRAF3     | -1.64 | -1.23 NM_003300.2    | Homo sapiens TNF receptor-associated factor 3 (TRAF3), 3, mRNA.                                             |
| UBE2N     | -1.64 | -1.34 NM_003348.3    | Homo sapiens ubiquitin-conjugating enzyme E2N (UBC13 homolog, yeast) (UBE2N), mRNA.                         |
| ING2      | -1.64 | -1.28 NM_001564.2    | Homo sapiens inhibitor of growth family, member 2 (ING2), mRNA.                                             |
| RPAP2     | -1.64 | -1.29 NM_024813.1    | Homo sapiens RNA polymerase II associated protein 2 (RPAP2), mRNA.                                          |
| TERC      | -1.64 | -1.23 NR_001566.1    | Homo sapiens telomerase RNA component (TERC) on chromosome 3.                                               |
| MRPS28    | -1.64 | -1.36 NM_014018.2    | Homo sapiens mitochondrial ribosomal protein S28 (MRPS28), mRNA.                                            |
| USP16     | -1.63 | -1.32 NM_006447.2    | Homo sapiens ubiquitin specific peptidase 16 (USP16), 1, mRNA.                                              |
| XPO4      | -1.63 | -1.32 NM_022459.4    | Homo sapiens exportin 4 (XPO4), mRNA.                                                                       |
| CASP1     | -1.63 | -1.21 NM_033294.2    | Homo sapiens caspase 1, apoptosis-related cysteine peptidase (interleukin 1, beta, convertase) (CASP1)      |
| CUL4A     | -1.63 | -1.35 NM_003589.2    | Homo sapiens cullin 4A (CUL4A), 2, mRNA.                                                                    |
| C14orf104 | -1.63 | -1.28 NM_018139.2    | Homo sapiens chromosome 14 open reading frame 104 (C14orf104), 1, mRNA.                                     |
| C3orf26   | -1.63 | -1.38 NM_032359.2    | Homo sapiens chromosome 3 open reading frame 26 (C3orf26), mRNA.                                            |
| PRR3      | -1.63 | -1.24 NM_001077497.1 | Homo sapiens proline rich 3 (PRR3), 2, mRNA.                                                                |
| PFKM      | -1.63 | -1.35 NM_000289.3    | Homo sapiens phosphofructokinase, muscle (PFKM), mRNA.                                                      |
| C9orf80   | -1.63 | -1.29 NM_021218.1    | Homo sapiens chromosome 9 open reading frame 80 (C9orf80), mRNA.                                            |
| PLOD3     | -1.62 | -1.35 NM_001084.4    | Homo sapiens procollagen-lysine, 2-oxoglutarate 5-dioxygenase 3 (PLOD3), mRNA.                              |

|           |       |       |                |                                                                                                    |
|-----------|-------|-------|----------------|----------------------------------------------------------------------------------------------------|
| PARP2     | -1.62 | -1.29 | NM_005484.2    | Homo sapiens poly (ADP-ribose) polymerase family, member 2 (PARP2), mRNA.                          |
| TIPARP    | -1.62 | -1.32 | NM_015508.3    | Homo sapiens TCDD-inducible poly(ADP-ribose) polymerase (TIPARP), mRNA.                            |
| PHIP      | -1.62 | -1.33 | NM_017934.4    | Homo sapiens pleckstrin homology domain interacting protein (PHIP), mRNA.                          |
| RUVBL1    | -1.62 | -1.33 | NM_003707.1    | Homo sapiens RuvB-like 1 (E. coli) (RUVBL1), mRNA.                                                 |
| TPP2      | -1.62 | -1.24 | NM_003291.1    | Homo sapiens tripeptidyl peptidase II (TPP2), mRNA.                                                |
| PHKA1     | -1.62 | -1.23 | NM_002637.2    | Homo sapiens phosphorylase kinase, alpha 1 (muscle) (PHKA1), mRNA.                                 |
| WRB       | -1.62 | -1.28 | NM_004627.2    | Homo sapiens tryptophan rich basic protein (WRB), mRNA.                                            |
| PRO1853   | -1.62 | -1.24 | NM_144736.3    | Homo sapiens hypothetical protein PRO1853 (PRO1853), 1, mRNA.                                      |
| SDCCAG1   | -1.62 | -1.28 | NM_004713.3    | Homo sapiens serologically defined colon cancer antigen 1 (SDCCAG1), mRNA.                         |
| SLC25A44  | -1.61 | -1.33 | NM_014655.1    | Homo sapiens solute carrier family 25, member 44 (SLC25A44), mRNA.                                 |
| IFNGR2    | -1.61 | -1.36 | NM_005534.2    | Homo sapiens interferon gamma receptor 2 (interferon gamma transducer 1) (IFNGR2), mRNA.           |
| POLS      | -1.61 | -1.32 | NM_006999.3    | Homo sapiens polymerase (DNA directed) sigma (POLS), mRNA.                                         |
| ZNF565    | -1.61 | -1.23 | NM_152477.3    | Homo sapiens zinc finger protein 565 (ZNF565), 2, mRNA.                                            |
| ADNP2     | -1.61 | -1.28 | NM_014913.2    | Homo sapiens ADNP homeobox 2 (ADNP2), mRNA.                                                        |
| SLC25A17  | -1.61 | -1.25 | NM_006358.2    | Homo sapiens solute carrier family 25 (mitochondrial carrier; peroxisomal membrane protein, 34kDa) |
| NUDT1     | -1.61 | -1.29 | NM_198948.1    | Homo sapiens nudix (nucleoside diphosphate linked moiety X)-type motif 1 (NUDT1), 2A, mRNA.        |
| LEAP2     | -1.61 | -1.22 | NM_052971.2    | Homo sapiens liver expressed antimicrobial peptide 2 (LEAP2), mRNA.                                |
| GATC      | -1.6  | -1.26 | NM_176818.1    | Homo sapiens glutamyl-tRNA(Gln) amidotransferase, subunit C homolog (bacterial) (GATC), mRNA.      |
| FOXJ2     | -1.6  | -1.32 | NM_018416.2    | Homo sapiens forkhead box J2 (FOXJ2), mRNA.                                                        |
| NAMPT     | -1.6  | -1.28 | NM_005746.2    | Homo sapiens nicotinamide phosphoribosyltransferase (NAMPT), mRNA.                                 |
| TTLL5     | -1.6  | -1.26 | NM_015072.3    | Homo sapiens tubulin tyrosine ligase-like family, member 5 (TTLL5), mRNA.                          |
| TOMM34    | -1.6  | -1.35 | NM_006809.4    | Homo sapiens translocase of outer mitochondrial membrane 34 (TOMM34)                               |
| RUVBL2    | -1.6  | -1.32 | NM_006666.1    | Homo sapiens RuvB-like 2 (E. coli) (RUVBL2), mRNA.                                                 |
| OSBPL5    | -1.6  | -1.27 | NM_020896.2    | Homo sapiens oxysterol binding protein-like 5 (OSBPL5), 1, mRNA.                                   |
| RBM12     | -1.6  | -1.26 | NM_006047.4    | Homo sapiens RNA binding motif protein 12 (RBM12), 1, mRNA.                                        |
| LOC647346 | -1.6  | -1.3  | XM_936495.2    | PREDICTED: Homo sapiens similar to Alcohol dehydrogenase class 3 chi chain(LOC647346), mRNA.       |
| IQCK      | -1.6  | -1.22 | NM_153208.1    | Homo sapiens IQ motif containing K (IQCK), mRNA.                                                   |
|           | -1.6  | -1.22 | BX103256       | BX103256 Soares_parathyroid_tumor_NbHPA Homo sapiens cDNA clone IMAGp998J244235, mRNA sequence     |
| CCDC137   | -1.6  | -1.21 | NM_199287.2    | Homo sapiens coiled-coil domain containing 137 (CCDC137), mRNA.                                    |
| PUS1      | -1.59 | -1.34 | NM_001002019.1 | Homo sapiens pseudouridylate synthase 1 (PUS1), 2, mRNA.                                           |
| GNL3      | -1.59 | -1.36 | NM_014366.4    | Homo sapiens guanine nucleotide binding protein-like 3 (nucleolar) (GNL3), 1, mRNA.                |
| AK2       | -1.59 | -1.34 | NM_001625.2    | Homo sapiens adenylate kinase 2 (AK2), AK2A, mRNA.                                                 |
| CSTF3     | -1.59 | -1.28 | NM_001033505.1 | Homo sapiens cleavage stimulation factor, 3' pre-RNA, subunit 3, 77kDa (CSTF3), 2, mRNA.           |
| PLEKHA2   | -1.59 | -1.31 | NM_021623.1    | Homo sapiens pleckstrin homology domain containing, family A (phosphoinositide binding specific)   |
| C17orf53  | -1.59 | -1.29 | NM_024032.2    | Homo sapiens chromosome 17 open reading frame 53 (C17orf53), mRNA.                                 |
| CCDC55    | -1.59 | -1.26 | NM_032141.2    | Homo sapiens coiled-coil domain containing 55 (CCDC55), 1, mRNA.                                   |
| BAG5      | -1.58 | -1.31 | NM_004873.2    | Homo sapiens BCL2-associated athanogene 5 (BAG5), 2, mRNA.                                         |
| EIF5B     | -1.58 | -1.32 | NM_015904.3    | Homo sapiens eukaryotic translation initiation factor 5B (EIF5B), mRNA.                            |
| NARS2     | -1.58 | -1.29 | NM_024678.3    | Homo sapiens asparaginyl-tRNA synthetase 2, mitochondrial (putative) (NARS2)                       |
| MTFR1     | -1.58 | -1.33 | NM_014637.2    | Homo sapiens mitochondrial fission regulator 1 (MTFR1), mRNA.                                      |
| GARNL1    | -1.58 | -1.25 | NM_014990.1    | Homo sapiens GTPase activating Rap/RanGAP domain-like 1 (GARNL1), 1, mRNA.                         |
|           | -1.58 | -1.21 | AK025793       | Homo sapiens cDNA: FLJ22140 fis, clone HEP20977                                                    |
| LOC728037 | -1.58 | -1.26 | XR_015190.1    | PREDICTED: Homo sapiens similar to Kinesin-like protein KIF22 (Kinesin-like DNA-binding protein)   |
| ZFYVE16   | -1.57 | -1.23 | NM_014733.2    | Homo sapiens zinc finger, FYVE domain containing 16 (ZFYVE16), mRNA.                               |
| KY        | -1.57 | -1.23 | NM_178554.4    | Homo sapiens kyphoscoliosis peptidase (KY), mRNA.                                                  |
| C7orf27   | -1.57 | -1.31 | NM_152743.2    | Homo sapiens chromosome 7 open reading frame 27 (C7orf27), mRNA.                                   |
| ST7L      | -1.57 | -1.22 | NM_138729.2    | Homo sapiens suppression of tumorigenicity 7 like (ST7L), 4, mRNA.                                 |
| RNF126P1  | -1.57 | -1.22 | NR_002818.2    | Homo sapiens ring finger protein 126 pseudogene 1 (RNF126P1) on chromosome 17.                     |
| C16orf63  | -1.57 | -1.28 | NM_144600.2    | Homo sapiens chromosome 16 open reading frame 63 (C16orf63), mRNA.                                 |

|           |       |       |                |                                                                                                           |
|-----------|-------|-------|----------------|-----------------------------------------------------------------------------------------------------------|
| KLHL13    | -1.57 | -1.27 | NM_033495.2    | Homo sapiens kelch-like 13 ( <i>Drosophila</i> ) (KLHL13), mRNA.                                          |
| RIC8B     | -1.57 | -1.22 | NM_018157.2    | Homo sapiens resistance to inhibitors of cholinesterase 8 homolog B ( <i>C. elegans</i> ) (RIC8B), mRNA.  |
| TELO2     | -1.57 | -1.22 | NM_016111.2    | Homo sapiens TEL2, telomere maintenance 2, homolog ( <i>S. cerevisiae</i> ) (TELO2), mRNA.                |
| KIAA0528  | -1.56 | -1.31 | NM_014802.1    | Homo sapiens KIAA0528 (KIAA0528), mRNA.                                                                   |
| TROVE2    | -1.56 | -1.32 | NM_001042369.1 | Homo sapiens TROVE domain family, member 2 (TROVE2), 1, mRNA.                                             |
| SEPHS1    | -1.56 | -1.32 | NM_012247.3    | Homo sapiens selenophosphate synthetase 1 (SEPHS1), mRNA.                                                 |
| DHPS      | -1.56 | -1.32 | NM_013406.1    | Homo sapiens deoxyhypusine synthase (DHPS), 2, mRNA.                                                      |
| C1orf119  | -1.56 | -1.27 | NM_020141.3    | Homo sapiens chromosome 1 open reading frame 119 (C1orf119), mRNA.                                        |
| SCO1      | -1.56 | -1.35 | NM_004589.1    | Homo sapiens SCO cytochrome oxidase deficient homolog 1 (yeast) (SCO1)                                    |
| MTDH      | -1.56 | -1.33 | NM_178812.2    | Homo sapiens metadherin (MTDH), mRNA.                                                                     |
| C9orf142  | -1.56 | -1.32 | NM_183241.1    | Homo sapiens chromosome 9 open reading frame 142 (C9orf142), mRNA.                                        |
| C1orf41   | -1.56 | -1.36 | NM_016126.1    | Homo sapiens chromosome 1 open reading frame 41 (C1orf41), mRNA.                                          |
| CYLD      | -1.55 | -1.21 | NM_015247.1    | Homo sapiens cylindromatosis (turban tumor syndrome) (CYLD), mRNA.                                        |
| NUP155    | -1.55 | -1.37 | NM_153485.1    | Homo sapiens nucleoporin 155kDa (NUP155), 1, mRNA.                                                        |
| EPRS      | -1.55 | -1.4  | NM_004446.2    | Homo sapiens glutamyl-prolyl-tRNA synthetase (EPRS), mRNA.                                                |
| FAM108C1  | -1.55 | -1.36 | NM_021214.1    | Homo sapiens family with sequence similarity 108, member C1 (FAM108C1), mRNA.                             |
| KLHDC4    | -1.55 | -1.25 | NM_017566.2    | Homo sapiens kelch domain containing 4 (KLHDC4), mRNA.                                                    |
| C14orf93  | -1.55 | -1.27 | NM_021944.1    | Homo sapiens chromosome 14 open reading frame 93 (C14orf93), mRNA.                                        |
| STRN      | -1.55 | -1.21 | NM_003162.2    | Homo sapiens striatin, calmodulin binding protein (STRN), mRNA.                                           |
|           | -1.55 | -1.21 | BX093763       | BX093763 Soares_fetal_heart_NbHH19W Homo sapiens cDNA clone IMAGp998N10870, mRNA sequence                 |
| C9orf75   | -1.55 | -1.22 | NM_173691.2    | Homo sapiens chromosome 9 open reading frame 75 (C9orf75), mRNA.                                          |
| KDEL3     | -1.54 | -1.22 | NM_016657.1    | Homo sapiens KDEL (Lys-Asp-Glu-Leu) endoplasmic reticulum protein retention receptor 3 (KDEL3)            |
| PTRH1     | -1.54 | -1.26 | NM_001002913.1 | Homo sapiens peptidyl-tRNA hydrolase 1 homolog ( <i>S. cerevisiae</i> ) (PTRH1), mRNA.                    |
| SOCS5     | -1.54 | -1.21 | NM_014011.4    | Homo sapiens suppressor of cytokine signaling 5 (SOCS5), 1, mRNA.                                         |
| TRRAP     | -1.54 | -1.34 | NM_003496.1    | Homo sapiens transformation/transcription domain-associated protein (TRRAP), mRNA.                        |
| CENPL     | -1.54 | -1.26 | NM_033319.1    | Homo sapiens centromere protein L (CENPL), mRNA.                                                          |
| C17orf68  | -1.54 | -1.22 | XM_938283.2    | PREDICTED: Homo sapiens chromosome 17 open reading frame 68 (C17orf68), mRNA.                             |
| ERCC8     | -1.53 | -1.22 | NM_001007234.1 | Homo sapiens excision repair cross-complementing rodent repair deficiency                                 |
| KIAA1712  | -1.53 | -1.28 | NM_001040157.1 | Homo sapiens KIAA1712 (KIAA1712), mRNA.                                                                   |
| POP7      | -1.52 | -1.3  | NM_005837.2    | Homo sapiens processing of precursor 7, ribonuclease P/MRP subunit ( <i>S. cerevisiae</i> ) (POP7), mRNA. |
| PMP22     | -1.52 | -1.33 | NM_153321.1    | Homo sapiens peripheral myelin protein 22 (PMP22), 2, mRNA.                                               |
| MYO19     | -1.52 | -1.19 | NM_001033580.1 | Homo sapiens myosin XIX (MYO19), 3, mRNA.                                                                 |
|           | -1.52 | -1.33 | AV737943       | AV737943 CB Homo sapiens cDNA clone CBDAEG06 5, mRNA sequence                                             |
| TIFA      | -1.52 | -1.21 | NM_052864.2    | Homo sapiens TRAF-interacting protein with forkhead-associated domain (TIFA), mRNA.                       |
| PRDM4     | -1.51 | -1.27 | NM_012406.3    | Homo sapiens PR domain containing 4 (PRDM4), mRNA.                                                        |
| TFDP1     | -1.51 | -1.35 | NM_007111.3    | Homo sapiens transcription factor Dp-1 (TFDP1), mRNA.                                                     |
| PHF17     | -1.51 | -1.18 | NM_024900.3    | Homo sapiens PHD finger protein 17 (PHF17), S, mRNA.                                                      |
| SHMT2     | -1.51 | -1.38 | NM_005412.4    | Homo sapiens serine hydroxymethyltransferase 2 (mitochondrial) (SHMT2)                                    |
| IAH1      | -1.51 | -1.3  | NM_001039613.1 | Homo sapiens isoamyl acetate-hydrolyzing esterase 1 homolog ( <i>S. cerevisiae</i> ) (IAH1), mRNA.        |
| CAPN10    | -1.51 | -1.22 | NM_023083.2    | Homo sapiens calpain 10 (CAPN10), 1, mRNA.                                                                |
| PSMD5     | -1.51 | -1.26 | NM_005047.2    | Homo sapiens proteasome (prosome, macropain) 26S subunit, non-ATPase, 5 (PSMD5), mRNA.                    |
| SIN3A     | -1.5  | -1.31 | NM_015477.1    | Homo sapiens SIN3 homolog A, transcription regulator (yeast) (SIN3A), mRNA.                               |
| CREB3L2   | -1.5  | -1.31 | NM_194071.2    | Homo sapiens cAMP responsive element binding protein 3-like 2 (CREB3L2), mRNA.                            |
| DEAF1     | -1.5  | -1.21 | NM_021008.2    | Homo sapiens deformed epidermal autoregulatory factor 1 ( <i>Drosophila</i> ) (DEAF1), mRNA.              |
| CAMSAP1L1 | -1.5  | -1.3  | NM_203459.1    | Homo sapiens calmodulin regulated spectrin-associated protein 1-like 1 (CAMSAP1L1), mRNA.                 |
| SMARCA2   | -1.49 | -1.31 | NM_003070.3    | Homo sapiens SWI/SNF related, matrix associated, actin dependent regulator of chromatin,                  |
| PAPLN     | -1.49 | -1.21 | NM_173462.3    | Homo sapiens papilin, proteoglycan-like sulfated glycoprotein (PAPLN), mRNA.                              |
| MEIS3P1   | -1.48 | -1.19 | NR_002211.1    | Homo sapiens Meis homeobox 3 pseudogene 1 (MEIS3P1) on chromosome 17.                                     |
| CT45-4    | -1.48 | -1.29 | NM_001017436.1 | Homo sapiens cancer/testis antigen CT45-4 (CT45-4), mRNA.                                                 |

|           |       |       |                |                                                                                                             |
|-----------|-------|-------|----------------|-------------------------------------------------------------------------------------------------------------|
| UBE2G1    | -1.47 | -1.29 | NM_003342.4    | Homo sapiens ubiquitin-conjugating enzyme E2G 1 (UBC7 homolog, yeast) (UBE2G1), mRNA.                       |
| C3orf28   | -1.47 | -1.29 | NM_014367.3    | Homo sapiens chromosome 3 open reading frame 28 (C3orf28), mRNA.                                            |
| ELOVL6    | -1.47 | -1.31 | NM_024090.1    | Homo sapiens ELOVL family member 6, elongation of long chain fatty acids                                    |
| KIAA0265  | -1.47 | -1.2  | NM_014997.2    | Homo sapiens KIAA0265 protein (KIAA0265), mRNA.                                                             |
| 6-Mar     | -1.47 | -1.27 | NM_005885.2    | Homo sapiens membrane-associated ring finger (C3HC4) 6 (MARCH6), mRNA.                                      |
| TPR       | -1.46 | -1.32 | NM_003292.2    | Homo sapiens translocated promoter region (to activated MET oncogene) (TPR), mRNA.                          |
| CNTROB    | -1.46 | -1.21 | NM_053051.1    | Homo sapiens centrobilin, centrosomal BRCA2 interacting protein (CNTROB), 1, mRNA.                          |
| LHX2      | -1.44 | -1.24 | NM_004789.3    | Homo sapiens LIM homeobox 2 (LHX2), mRNA.                                                                   |
| CEBPG     | -1.44 | -1.27 | NM_001806.2    | Homo sapiens CCAAT/enhancer binding protein (C/EBP), gamma (CEBPG), mRNA.                                   |
| HPS5      | -1.44 | -1.23 | NM_007216.3    | Homo sapiens Hermansky-Pudlak syndrome 5 (HPS5), 2, mRNA.                                                   |
| AIG1      | -1.43 | -1.2  | NM_016108.2    | Homo sapiens androgen-induced 1 (AIG1), mRNA.                                                               |
| MRPL48    | -1.42 | -1.27 | NM_016055.4    | Homo sapiens mitochondrial ribosomal protein L48 (MRPL48), mRNA.                                            |
| ENAH      | -1.41 | -1.2  | NM_018212.4    | Homo sapiens enabled homolog (Drosophila) (ENAH), 2, mRNA.                                                  |
| NPAL3     | -1.41 | -1.21 | NM_020448.3    | Homo sapiens NIPA-like domain containing 3 (NPAL3), mRNA.                                                   |
| PEG10     | -1.4  | -1.18 | XM_499343.2    | PREDICTED: Homo sapiens paternally expressed 10 (PEG10), mRNA.                                              |
| MPP7      | -1.4  | -1.17 | NM_173496.3    | Homo sapiens membrane protein, palmitoylated 7 (MAGUK p55 subfamily member 7) (MPP7), mRNA.                 |
| SP4       | -1.39 | -1.18 | NM_003112.3    | Homo sapiens Sp4 transcription factor (SP4), mRNA.                                                          |
| SUNC1     | -1.39 | -1.18 | NM_001030019.1 | Homo sapiens Sad1 and UNC84 domain containing 1 (SUNC1), 1, mRNA.                                           |
| LOC653778 | -1.38 | -1.22 | XM_929667.1    | PREDICTED: Homo sapiens similar to solute carrier family 25, member 37 (LOC653778), mRNA.                   |
| GOLGA4    | -1.37 | -1.22 | NM_002078.3    | Homo sapiens golgi autoantigen, golgin subfamily a, 4 (GOLGA4), mRNA.                                       |
| BMPR2     | -1.37 | -1.2  | NM_001204.5    | Homo sapiens bone morphogenetic protein receptor, type II (serine/threonine kinase) (BMPR2), mRNA.          |
| NR3C1     | -1.37 | -1.19 | NM_001020825.1 | Homo sapiens nuclear receptor subfamily 3, group C, member 1 (glucocorticoid receptor) (NR3C1)              |
| KLHDC5    | -1.36 | -1.25 | NM_020782.1    | Homo sapiens kelch domain containing 5 (KLHDC5), mRNA.                                                      |
| PTPN11    | -1.35 | -1.3  | NM_002834.3    | Homo sapiens protein tyrosine phosphatase, non-receptor type 11 (Noonan syndrome 1) (PTPN11), mRNA.         |
| ANAPC10   | -1.35 | -1.23 | NM_014885.3    | Homo sapiens anaphase promoting complex subunit 10 (ANAPC10), mRNA.                                         |
| RAB3GAP1  | -1.34 | -1.28 | NM_012233.1    | Homo sapiens RAB3 GTPase activating protein subunit 1 (catalytic) (RAB3GAP1), mRNA.                         |
| IL27RA    | -1.34 | -1.25 | NM_004843.2    | Homo sapiens interleukin 27 receptor, alpha (IL27RA), mRNA.                                                 |
| SIX2      | -1.33 | -1.17 | NM_016932.3    | Homo sapiens SIX homeobox 2 (SIX2), mRNA.                                                                   |
| ANP32C    | -1.33 | -1.19 | NM_012403.1    | Homo sapiens acidic (leucine-rich) nuclear phosphoprotein 32 family, member C (ANP32C), mRNA.               |
| ARID4B    | -1.32 | -1.16 | NM_016374.5    | Homo sapiens AT rich interactive domain 4B (RBP1-like) (ARID4B), 1, mRNA.                                   |
| COMT      | -1.32 | -1.19 | NM_000754.2    | Homo sapiens catechol-O-methyltransferase (COMT), MB-COMT, mRNA.                                            |
| GNL3      | -1.31 | -1.31 | NM_206826.1    | Homo sapiens guanine nucleotide binding protein-like 3 (nucleolar) (GNL3), 3, mRNA.                         |
| RNH1      | -1.31 | -1.23 | NM_203385.1    | Homo sapiens ribonuclease/angiogenin inhibitor 1 (RNH1), 4, mRNA.                                           |
| CERK      | -1.31 | -1.23 | NM_182661.1    | Homo sapiens ceramide kinase (CERK), 2, mRNA.                                                               |
| FNBP1L    | -1.31 | -1.27 | NM_001024948.1 | Homo sapiens formin binding protein 1-like (FNBP1L), 1, mRNA.                                               |
| C9orf100  | -1.31 | -1.18 | NM_032818.1    | Homo sapiens chromosome 9 open reading frame 100 (C9orf100), 2, mRNA.                                       |
| ZDHHC14   | -1.31 | -1.21 | NM_024630.2    | Homo sapiens zinc finger, DHHC-type containing 14 (ZDHHC14), 1, mRNA.                                       |
| TMEM159   | -1.31 | -1.18 | NM_020422.3    | Homo sapiens transmembrane protein 159 (TMEM159), mRNA.                                                     |
| LOC653884 | -1.3  | -1.25 | XM_936240.1    | PREDICTED: Homo sapiens similar to FUS interacting protein (serine-arginine rich) 1 (LOC653884), mRNA.      |
| PGRMC1    | -1.29 | -1.3  | NM_006667.2    | Homo sapiens progesterone receptor membrane component 1 (PGRMC1), mRNA.                                     |
| NFS1      | -1.28 | -1.16 | NM_021100.3    | Homo sapiens NFS1 nitrogen fixation 1 homolog (S. cerevisiae) (NFS1)                                        |
| C3orf23   | -1.28 | -1.15 | NM_001029840.2 | Homo sapiens chromosome 3 open reading frame 23 (C3orf23), 3, mRNA.                                         |
| LSMD1     | -1.27 | -1.26 | NM_032356.3    | Homo sapiens LSM domain containing 1 (LSMD1), mRNA.                                                         |
| C20orf117 | -1.27 | -1.2  | NM_199181.2    | Homo sapiens chromosome 20 open reading frame 117 (C20orf117), 2, mRNA.                                     |
| LOC205251 | -1.27 | -1.22 | XR_017711.1    | PREDICTED: Homo sapiens misc_RNA (LOC205251), miscRNA.                                                      |
| ELOVL6    | -1.27 | -1.21 | NM_024090.1    | Homo sapiens ELOVL family member 6, elongation of long chain fatty acids (FEN1/Elo2, SUR4/Elo3-like, yeast) |
| USP34     | -1.26 | -1.23 | NM_014709.3    | Homo sapiens ubiquitin specific peptidase 34 (USP34), mRNA.                                                 |
| ATM       | -1.26 | -1.2  | NM_000051.3    | Homo sapiens ataxia telangiectasia mutated (ATM), 1, mRNA.                                                  |
| SH3RF1    | -1.26 | -1.19 | NM_020870.3    | Homo sapiens SH3 domain containing ring finger 1 (SH3RF1), mRNA.                                            |

|           |       |       |                |                                                                                                                     |
|-----------|-------|-------|----------------|---------------------------------------------------------------------------------------------------------------------|
| ITCH      | -1.25 | -1.19 | NM_031483.3    | Homo sapiens itchy homolog E3 ubiquitin protein ligase (mouse) (ITCH), mRNA.                                        |
| MAP4      | -1.25 | -1.15 | NM_002375.3    | Homo sapiens microtubule-associated protein 4 (MAP4), 1, mRNA.                                                      |
| SETDB2    | -1.24 | -1.17 | NM_031915.1    | Homo sapiens SET domain, bifurcated 2 (SETDB2), mRNA.                                                               |
| LOC643997 | -1.23 | -1.3  | XM_292963.6    | PREDICTED: Homo sapiens similar to peptidylprolyl isomerase A isoform 1 (LOC643997), mRNA.                          |
| LAPTM4A   | -1.22 | -1.19 | NM_014713.3    | Homo sapiens lysosomal-associated protein transmembrane 4 alpha (LAPTM4A), mRNA.                                    |
| HOXB5     | -1.21 | -1.21 | NM_002147.3    | Homo sapiens homeobox B5 (HOXB5), mRNA.                                                                             |
| DR1       | -1.2  | -1.23 | NM_001938.2    | Homo sapiens down-regulator of transcription 1, TBP-binding (negative cofactor 2) (DR1), mRNA.                      |
| SATB2     | -1.2  | -1.17 | NM_015265.1    | Homo sapiens SATB homeobox 2 (SATB2), mRNA.                                                                         |
| RNGTT     | -1.19 | -1.21 | NM_003800.3    | Homo sapiens RNA guanylyltransferase and 5'-phosphatase (RNGTT), mRNA.                                              |
| LOC652815 | -1.19 | -1.13 | XM_942488.1    | PREDICTED: Homo sapiens similar to FK506-binding protein 9 precursor (Peptidyl-prolyl cis-trans isomerase) (PPIase) |
| DNAJC13   | -1.18 | -1.19 | NM_015268.3    | Homo sapiens DnaJ (Hsp40) homolog, subfamily C, member 13 (DNAJC13), mRNA.                                          |
| ZC3H7A    | -1.18 | -1.14 | NM_014153.2    | Homo sapiens zinc finger CCCH-type containing 7A (ZC3H7A), mRNA.                                                    |
| TXNDC13   | -1.17 | -1.17 | NM_021156.2    | Homo sapiens thioredoxin domain containing 13 (TXNDC13), mRNA.                                                      |
| GTF2F2    | -1.16 | -1.25 | NM_004128.1    | Homo sapiens general transcription factor IIF, polypeptide 2, 30kDa (GTF2F2), mRNA.                                 |
| GLE1      | -1.16 | -1.26 | NM_001003722.1 | Homo sapiens GLE1 RNA export mediator homolog (yeast) (GLE1), 1, mRNA.                                              |
| PDCD4     | -1.16 | -1.26 | NM_145341.2    | Homo sapiens programmed cell death 4 (neoplastic transformation inhibitor) (PDCD4), 2, mRNA.                        |
| CDAN1     | -1.16 | -1.16 | XM_001129302.1 | PREDICTED: Homo sapiens congenital dyserythropoietic anemia, type I (CDAN1), mRNA.                                  |
| DDX31     | -1.16 | -1.13 | NM_138620.1    | Homo sapiens DEAD (Asp-Glu-Ala-Asp) box polypeptide 31 (DDX31), 2, mRNA.                                            |
| LOC643452 | -1.16 | -1.17 | XM_928241.1    | PREDICTED: Homo sapiens similar to bromodomain containing 7 (LOC643452), mRNA.                                      |
| LACTB     | -1.15 | -1.23 | NM_032857.2    | Homo sapiens lactamase, beta (LACTB), 1, mRNA.                                                                      |
|           | -1.15 | -1.17 | BX112399       | BX112399 Soares_multiple_sclerosis_2NbHMSP Homo sapiens cDNA clone IMAGp998B18625, mRNA sequence                    |
| OSGEPL1   | -1.15 | -1.14 | NM_022353.1    | Homo sapiens O-sialoglycoprotein endopeptidase-like 1 (OSGEPL1), mRNA.                                              |
| C15orf44  | -1.14 | -1.14 | NM_030800.1    | Homo sapiens chromosome 15 open reading frame 44 (C15orf44), mRNA.                                                  |
| FASTKD3   | -1.13 | -1.22 | NM_024091.2    | Homo sapiens FAST kinase domains 3 (FASTKD3), mRNA.                                                                 |
| MYST2     | -1.12 | -1.13 | NM_007067.3    | Homo sapiens MYST histone acetyltransferase 2 (MYST2), mRNA.                                                        |
| RPSA      | -1.11 | -1.16 | NM_001012321.1 | Homo sapiens ribosomal protein SA (RPSA), 2, mRNA.                                                                  |
| EEF1E1    | -1.1  | -1.27 | NM_004280.3    | Homo sapiens eukaryotic translation elongation factor 1 epsilon 1 (EEF1E1), mRNA.                                   |
| KIAA0100  | -1.09 | -1.14 | NM_014680.2    | Homo sapiens KIAA0100 (KIAA0100), mRNA.                                                                             |
| IPO9      | -1.08 | -1.21 | NM_018085.4    | Homo sapiens importin 9 (IPO9), mRNA.                                                                               |
| TMEM181   | -1.08 | -1.22 | NM_020823.1    | Homo sapiens transmembrane protein 181 (TMEM181), mRNA.                                                             |
| UBE2G1    | -1.07 | -1.23 | NM_003342.4    | Homo sapiens ubiquitin-conjugating enzyme E2G 1 (UBC7 homolog, yeast) (UBE2G1), mRNA.                               |
| WDR57     | -1.07 | -1.23 | NM_004814.1    | Homo sapiens WD repeat domain 57 (U5 snRNP specific) (WDR57), mRNA.                                                 |
| RTF1      | -1.07 | -1.13 | NM_015138.3    | Homo sapiens Rtf1, Paf1/RNA polymerase II complex component, homolog (S. cerevisiae) (RTF1), mRNA.                  |
| ATP9A     | -1.06 | -1.22 | NM_006045.1    | Homo sapiens ATPase, class II, type 9A (ATP9A), mRNA.                                                               |
| ENAH      | -1.06 | -1.16 | NM_018212.4    | Homo sapiens enabled homolog (Drosophila) (ENAH), 2, mRNA.                                                          |
| PSME4     | -1.06 | -1.26 | NM_014614.1    | Homo sapiens proteasome (prosome, macropain) activator subunit 4 (PSME4), mRNA.                                     |
| ATM       | -1.05 | -1.16 | NM_000051.3    | Homo sapiens ataxia telangiectasia mutated (ATM), 1, mRNA.                                                          |
| EGFR      | -1.05 | -1.17 | NM_005228.3    | Homo sapiens epidermal growth factor receptor (erythroblastic leukemia viral (v-erb-b)                              |
| SNRK      | -1.04 | -1.16 | NM_017719.3    | Homo sapiens SNF related kinase (SNRK), mRNA.                                                                       |
| PPM1G     | -1.04 | -1.3  | NM_002707.3    | Homo sapiens protein phosphatase 1G (formerly 2C), magnesium-dependent, gamma isoform (PPM1G)                       |
| PITX1     | -1.03 | -1.27 | NM_002653.3    | Homo sapiens paired-like homeodomain transcription factor 1 (PITX1), mRNA.                                          |
| ACSL4     | -1.03 | -1.14 | NM_022977.1    | Homo sapiens acyl-CoA synthetase long-chain family member 4 (ACSL4), 2, mRNA.                                       |
| THAP7     | -1.01 | -1.11 | NM_001008696.1 | Homo sapiens THAP domain containing 7 (THAP7), 3, mRNA.                                                             |
| ZBTB40    | -1.01 | -1.15 | NM_001083621.1 | Homo sapiens zinc finger and BTB domain containing 40 (ZBTB40), 1, mRNA.                                            |
| PAICS     | -0.99 | -1.28 | NM_006452.3    | Homo sapiens phosphoribosylaminoimidazole carboxylase (PAICS), 2, mRNA.                                             |
| CSE1L     | -0.99 | -1.26 | NM_001316.2    | Homo sapiens CSE1 chromosome segregation 1-like (yeast) (CSE1L), mRNA.                                              |
| CSPP1     | -0.99 | -1.12 | NM_001077204.1 | Homo sapiens centrosome and spindle pole associated protein 1 (CSPP1), 1, mRNA.                                     |
| ATAD3B    | -0.99 | -1.11 | NM_031921.4    | Homo sapiens ATPase family, AAA domain containing 3B (ATAD3B), mRNA.                                                |
| GPBP1L1   | -0.98 | -1.13 | NM_021639.3    | Homo sapiens GC-rich promoter binding protein 1-like 1 (GPBP1L1), mRNA.                                             |

|              |       |       |                |                                                                                                                    |
|--------------|-------|-------|----------------|--------------------------------------------------------------------------------------------------------------------|
| FAM62A       | -0.98 | -1.21 | NM_015292.1    | Homo sapiens family with sequence similarity 62 (C2 domain containing), member A (FAM62A), mRNA.                   |
| TRAF5        | -0.95 | -1.15 | NM_004619.3    | Homo sapiens TNF receptor-associated factor 5 (TRAF5), 1, mRNA.                                                    |
| RABGEF1      | -0.94 | -1.11 | NM_014504.1    | Homo sapiens RAB guanine nucleotide exchange factor (GEF) 1 (RABGEF1), mRNA.                                       |
| NIPBL        | -0.93 | -1.15 | NM_133433.2    | Homo sapiens Nipped-B homolog (Drosophila) (NIPBL), A, mRNA.                                                       |
| C2orf15      | -0.93 | -1.09 | NM_144706.2    | Homo sapiens chromosome 2 open reading frame 15 (C2orf15), mRNA.                                                   |
| CASK         | -0.92 | -1.14 | NM_003688.1    | Homo sapiens calcium/calmodulin-dependent serine protein kinase (MAGUK family) (CASK), mRNA.                       |
| FASTKD1      | -0.92 | -1.13 | NM_024622.2    | Homo sapiens FAST kinase domains 1 (FASTKD1), mRNA.                                                                |
| BIRC6        | -0.91 | -1.12 | NM_016252.3    | Homo sapiens baculoviral IAP repeat-containing 6 (apollon) (BIRC6), mRNA.                                          |
| TAF6         | -0.9  | -1.1  | NM_139315.1    | Homo sapiens TAF6 RNA polymerase II, TATA box binding protein (TBP)-associated factor, 80kDa (TAF6)                |
| MPZL2        | -0.89 | -1.11 | NM_144765.1    | Homo sapiens myelin protein zero-like 2 (MPZL2), 2, mRNA.                                                          |
| PRKCA        | -0.89 | -1.15 | NM_002737.2    | Homo sapiens protein kinase C, alpha (PRKCA), mRNA.                                                                |
| TDRD9        | -0.89 | -1.15 | NM_153046.1    | Homo sapiens tudor domain containing 9 (TDRD9), mRNA.                                                              |
| EIF5         | -0.88 | -1.2  | NM_001969.3    | Homo sapiens eukaryotic translation initiation factor 5 (EIF5), 1, mRNA.                                           |
| HDAC4        | -0.88 | -1.14 | NM_006037.3    | Homo sapiens histone deacetylase 4 (HDAC4), mRNA.                                                                  |
| IRF1         | -0.88 | -1.16 | NM_002198.1    | Homo sapiens interferon regulatory factor 1 (IRF1), mRNA.                                                          |
| CHD6         | -0.88 | -1.12 | NM_032221.3    | Homo sapiens chromodomain helicase DNA binding protein 6 (CHD6), mRNA.                                             |
| SAP130       | -0.88 | -1.17 | NM_024545.2    | Homo sapiens Sin3A-associated protein, 130kDa (SAP130), mRNA.                                                      |
| ACACA        | -0.87 | -1.19 | NM_198836.1    | Homo sapiens acetyl-Coenzyme A carboxylase alpha (ACACA), 3, mRNA.                                                 |
| C6orf47      | -0.87 | -1.1  | NM_021184.3    | Homo sapiens chromosome 6 open reading frame 47 (C6orf47), mRNA.                                                   |
| PIGW         | -0.86 | -1.12 | NM_178517.3    | Homo sapiens phosphatidylinositol glycan anchor biosynthesis, class W (PIGW), mRNA.                                |
| SVEP1        | -0.86 | -1.16 | NM_153366.2    | Homo sapiens sushi, von Willebrand factor type A, EGF and pentraxin domain containing 1 (SVEP1), mRNA.             |
| USP4         | -0.85 | -1.12 | NM_003363.2    | Homo sapiens ubiquitin specific peptidase 4 (proto-oncogene) (USP4), 1, mRNA.                                      |
| CBL          | -0.85 | -1.11 | NM_005188.2    | Homo sapiens Cas-Br-M (murine) ecotropic retroviral transforming sequence (CBL), mRNA.                             |
| GTPBP3       | -0.84 | -1.2  | NM_032620.1    | Homo sapiens GTP binding protein 3 (mitochondrial) (GTPBP3)                                                        |
| LRBA         | -0.84 | -1.14 | NM_006726.1    | Homo sapiens LPS-responsive vesicle trafficking, beach and anchor containing (LRBA), mRNA.                         |
| FAM8A1       | -0.83 | -1.1  | NM_016255.1    | Homo sapiens family with sequence similarity 8, member A1 (FAM8A1), mRNA.                                          |
| LOC441743    | -0.79 | -1.1  | NM_001045548.1 | Homo sapiens similar to C367G8.3 (novel protein similar to RPL23A (60S ribosomal protein L23A)) (LOC441743), mRNA. |
| PRKDC        | -0.78 | -1.12 | NM_006904.6    | Homo sapiens protein kinase, DNA-activated, catalytic polypeptide (PRKDC), 1, mRNA.                                |
| EARS2        | -0.78 | -1.12 | NR_003501.1    | Homo sapiens glutamyl-tRNA synthetase 2, mitochondrial (putative) (EARS2), 2, transcribed RNA.                     |
| TMCO4        | -0.78 | -1.07 | NM_181719.3    | Homo sapiens transmembrane and coiled-coil domains 4 (TMCO4), mRNA.                                                |
| DIP2B        | -0.77 | -1.15 | NM_173602.2    | Homo sapiens DIP2 disco-interacting protein 2 homolog B (Drosophila) (DIP2B), mRNA.                                |
| ZNF700       | -0.76 | -1.08 | NM_144566.1    | Homo sapiens zinc finger protein 700 (ZNF700), mRNA.                                                               |
| FAM131B      | -0.76 | -1.07 | NM_001031690.1 | Homo sapiens family with sequence similarity 131, member B (FAM131B), mRNA.                                        |
| TSPO         | -0.74 | -1.25 | NM_000714.4    | Homo sapiens translocator protein (18kDa) (TSPO), PBR, mRNA.                                                       |
| ZNF318       | -0.74 | -1.11 | NM_014345.1    | Homo sapiens zinc finger protein 318 (ZNF318), mRNA.                                                               |
| SS18         | -0.74 | -1.15 | NM_005637.2    | Homo sapiens synovial sarcoma translocation, chromosome 18 (SS18), 2, mRNA.                                        |
| APITD1       | -0.73 | -1.07 | NM_199295.1    | Homo sapiens apoptosis-inducing, TAF9-like domain 1 (APITD1), B, mRNA.                                             |
| HUWE1        | -0.72 | -1.11 | NM_031407.3    | Homo sapiens HECT, UBA and WWE domain containing 1 (HUWE1), mRNA.                                                  |
| MAPK1        | -0.72 | -1.08 | NM_138957.2    | Homo sapiens mitogen-activated protein kinase 1 (MAPK1), 2, mRNA.                                                  |
| ASXL1        | -0.72 | -1.13 | NM_015338.4    | Homo sapiens additional sex combs like 1 (Drosophila) (ASXL1), mRNA.                                               |
| DKFZp5861142 | -0.72 | -1.09 | NR_002186.1    | Homo sapiens hypothetical protein DKFZp58611420 (DKFZp58611420) on chromosome 7.                                   |
| CA5B         | -0.71 | -1.06 | NM_007220.3    | Homo sapiens carbonic anhydrase VB, mitochondrial (CA5B), mRNA.                                                    |
| BCKDK        | -0.71 | -1.17 | NM_005881.1    | Homo sapiens branched chain ketoacid dehydrogenase kinase (BCKDK), mRNA.                                           |
| LOC648024    | -0.71 | -1.2  | XR_018316.1    | PREDICTED: Homo sapiens similar to eukaryotic translation initiation factor 4A, isoform 1 (LOC648024), mRNA.       |
| ZNF197       | -0.7  | -1.05 | NM_006991.3    | Homo sapiens zinc finger protein 197 (ZNF197), 1, mRNA.                                                            |
| DDX39        | -0.7  | -1.21 | NM_005804.2    | Homo sapiens DEAD (Asp-Glu-Ala-Asp) box polypeptide 39 (DDX39), mRNA.                                              |
| ZNF294       | -0.7  | -1.11 | NM_015565.1    | Homo sapiens zinc finger protein 294 (ZNF294), mRNA.                                                               |
| C3orf59      | -0.7  | -1.08 | NM_178496.2    | Homo sapiens chromosome 3 open reading frame 59 (C3orf59), mRNA.                                                   |
| DDX5         | -0.69 | -1.23 | NM_004396.2    | Homo sapiens DEAD (Asp-Glu-Ala-Asp) box polypeptide 5 (DDX5), mRNA.                                                |



|           |       |                      |                                                                                                              |
|-----------|-------|----------------------|--------------------------------------------------------------------------------------------------------------|
| RAE1      | -0.68 | -1.16 NM_003610.3    | Homo sapiens RAE1 RNA export 1 homolog (S. pombe) (RAE1), 1, mRNA.                                           |
| STX11     | -0.67 | -1.08 NM_003764.2    | Homo sapiens syntaxin 11 (STX11), mRNA.                                                                      |
| VPS13A    | -0.67 | -1.08 NM_033305.2    | Homo sapiens vacuolar protein sorting 13 homolog A (S. cerevisiae) (VPS13A), A, mRNA.                        |
| C11orf61  | -0.67 | -1.05 NM_024631.1    | Homo sapiens chromosome 11 open reading frame 61 (C11orf61), mRNA.                                           |
| NCAPH2    | -0.66 | -1.05 NM_152299.2    | Homo sapiens non-SMC condensin II complex, subunit H2 (NCAPH2), 2, mRNA.                                     |
| LEMD3     | -0.66 | -1.12 NM_014319.3    | Homo sapiens LEM domain containing 3 (LEMD3), mRNA.                                                          |
| DCTN1     | -0.65 | -1.11 NM_004082.2    | Homo sapiens dynactin 1 (p150, glued homolog, Drosophila) (DCTN1), 1, mRNA.                                  |
| C20orf11  | -0.64 | -1.13 NM_017896.2    | Homo sapiens chromosome 20 open reading frame 11 (C20orf11), mRNA.                                           |
| TOP2B     | -0.63 | -1.17 NM_001068.2    | Homo sapiens topoisomerase (DNA) II beta 180kDa (TOP2B), mRNA.                                               |
|           | -0.63 | -1.07 AK091904       | Homo sapiens cDNA FLJ34585 fis, clone KIDNE2008758                                                           |
| MITD1     | -0.62 | -1.12 NM_138798.1    | Homo sapiens MIT, microtubule interacting and transport, domain containing 1 (MITD1), mRNA.                  |
| DUSP12    | -0.61 | -1.16 NM_007240.1    | Homo sapiens dual specificity phosphatase 12 (DUSP12), mRNA.                                                 |
| MMP24     | -0.6  | -1.04 NM_006690.3    | Homo sapiens matrix metalloproteinase 24 (membrane-inserted) (MMP24), mRNA.                                  |
| EP400     | -0.59 | -1.1 NM_015409.3     | Homo sapiens E1A binding protein p400 (EP400), mRNA.                                                         |
| POLR2J4   | -0.59 | -1.03 NR_003655.1    | Homo sapiens polymerase (RNA) II (DNA directed) polypeptide J, 13.3kDa pseudogene (POLR2J4) on chromosome 7. |
| GPR177    | -0.54 | -1.17 NM_024911.4    | Homo sapiens G protein-coupled receptor 177 (GPR177), 1, mRNA.                                               |
| KIAA2026  | -0.54 | -1.05 NM_001017969.1 | Homo sapiens KIAA2026 (KIAA2026), mRNA.                                                                      |
| LOC221710 | -0.53 | -1.1 XM_927609.1     | PREDICTED: Homo sapiens hypothetical protein LOC221710 (LOC221710), mRNA.                                    |
| ECGF1     | -0.52 | -1.14 NM_001953.2    | Homo sapiens endothelial cell growth factor 1 (platelet-derived) (ECGF1), mRNA.                              |
| LOC391811 | -0.52 | -1.19 XR_018614.1    | PREDICTED: Homo sapiens similar to DNA polymerase delta subunit 2                                            |
| ACACA     | -0.51 | -1.11 NM_198839.1    | Homo sapiens acetyl-Coenzyme A carboxylase alpha (ACACA), 2, mRNA.                                           |
| LOC728505 | -0.51 | -1.02 XM_001127580.1 | PREDICTED: Homo sapiens similar to CG17293-PA (LOC728505), mRNA.                                             |
| MRPL27    | -0.5  | -1.03 NM_148571.1    | Homo sapiens mitochondrial ribosomal protein L27 (MRPL27)                                                    |
| MET       | -0.49 | -1.07 NM_000245.2    | Homo sapiens met proto-oncogene (hepatocyte growth factor receptor) (MET), mRNA.                             |
| EIF4G3    | -0.48 | -1.09 NM_003760.3    | Homo sapiens eukaryotic translation initiation factor 4 gamma, 3 (EIF4G3), mRNA.                             |
| ATG10     | -0.48 | -1.06 NM_031482.3    | Homo sapiens ATG10 autophagy related 10 homolog (S. cerevisiae) (ATG10), mRNA.                               |
| C11orf57  | -0.46 | -1.05 NM_018195.3    | Homo sapiens chromosome 11 open reading frame 57 (C11orf57), 1, mRNA.                                        |
| GPC6      | -0.46 | -1.02 NM_005708.2    | Homo sapiens glypican 6 (GPC6), mRNA.                                                                        |
| CSNK1A1   | -0.44 | -1 NM_001025105.1    | Homo sapiens casein kinase 1, alpha 1 (CSNK1A1), 1, mRNA.                                                    |
| FBXO28    | -0.41 | -1.09 NM_015176.1    | Homo sapiens F-box protein 28 (FBXO28), mRNA.                                                                |
| ZNF223    | -0.41 | -1.04 NM_013361.3    | Homo sapiens zinc finger protein 223 (ZNF223), mRNA.                                                         |
| UBE4A     | -0.41 | -1.07 NM_004788.2    | Homo sapiens ubiquitination factor E4A (UFD2 homolog, yeast) (UBE4A), mRNA.                                  |
| MLH1      | -0.41 | -1.07 NM_000249.2    | Homo sapiens mutL homolog 1, colon cancer, nonpolyposis type 2 (E. coli) (MLH1), mRNA.                       |
| MTX2      | -0.4  | -1.07 NM_006554.3    | Homo sapiens metaxin 2 (MTX2), 1, mRNA.                                                                      |
| TCF12     | -0.4  | -1.05 NM_207038.1    | Homo sapiens transcription factor 12 (HTF4, helix-loop-helix transcription factors 4) (TCF12)                |
| STARD7    | -0.4  | 1.01 NM_020151.3     | Homo sapiens StAR-related lipid transfer (START) domain containing 7 (STARD7), mRNA.                         |
| TRIP11    | -0.39 | -1.05 NM_004239.1    | Homo sapiens thyroid hormone receptor interactor 11 (TRIP11), mRNA.                                          |
| NCOA3     | -0.39 | -1.09 NM_181659.1    | Homo sapiens nuclear receptor coactivator 3 (NCOA3), 1, mRNA.                                                |
| C8orf32   | -0.39 | -1.04 NM_018024.1    | Homo sapiens chromosome 8 open reading frame 32 (C8orf32), mRNA.                                             |
| LRIG1     | -0.39 | -1.01 NM_015541.2    | Homo sapiens leucine-rich repeats and immunoglobulin-like domains 1 (LRIG1), mRNA.                           |
| MNAT1     | -0.36 | -1.04 NM_002431.2    | Homo sapiens menage a trois homolog 1, cyclin H assembly factor (Xenopus laevis) (MNAT1), mRNA.              |
| RPL8      | -0.36 | -1.1 NM_033301.1     | Homo sapiens ribosomal protein L8 (RPL8), 2, mRNA.                                                           |
| C14orf159 | -0.36 | -1.02 NM_024952.5    | Homo sapiens chromosome 14 open reading frame 159 (C14orf159), mRNA.                                         |
| ABLIM1    | -0.35 | 1.01 NM_006720.3     | Homo sapiens actin binding LIM protein 1 (ABLIM1), 4, mRNA.                                                  |
| DOCK1     | -0.35 | -1.06 NM_001380.3    | Homo sapiens dedicator of cytokinesis 1 (DOCK1), mRNA.                                                       |
| SNORA64   | -0.35 | -1.03 NR_002326.1    | Homo sapiens small nucleolar RNA, H/ACA box 64 (SNORA64) on chromosome 16.                                   |
| BMPR2     | -0.33 | -1 NM_001204.5       | Homo sapiens bone morphogenetic protein receptor, type II (serine/threonine kinase) (BMPR2), mRNA.           |
| ZNHIT3    | -0.33 | -1.09 NM_004773.2    | Homo sapiens zinc finger, HIT type 3 (ZNHIT3), mRNA.                                                         |
| CHES1     | -0.33 | -1.04 NM_005197.2    | Homo sapiens checkpoint suppressor 1 (CHES1), mRNA.                                                          |

|           |       |                      |                                                                                                      |
|-----------|-------|----------------------|------------------------------------------------------------------------------------------------------|
| PHKB      | -0.33 | -1.02 NM_000293.1    | Homo sapiens phosphorylase kinase, beta (PHKB), 1, mRNA.                                             |
| PRPF40A   | -0.32 | -1.05 NM_017892.3    | Homo sapiens PRP40 pre-mRNA processing factor 40 homolog A ( <i>S. cerevisiae</i> ) (PRPF40A), mRNA. |
| GCLC      | -0.31 | -1.06 NM_001498.2    | Homo sapiens glutamate-cysteine ligase, catalytic subunit (GCLC), mRNA.                              |
| PHKA2     | -0.31 | -1.05 NM_000292.1    | Homo sapiens phosphorylase kinase, alpha 2 (liver) (PHKA2), mRNA.                                    |
| SLC25A14  | -0.3  | -1.03 NM_003951.2    | Homo sapiens solute carrier family 25 (mitochondrial carrier, brain), member 14 (SLC25A14),          |
| PIGN      | -0.3  | -1.05 NM_176787.4    | Homo sapiens phosphatidylinositol glycan anchor biosynthesis, class N (PIGN), 1, mRNA.               |
| NIPBL     | -0.3  | -1.07 NM_133433.2    | Homo sapiens Nipped-B homolog ( <i>Drosophila</i> ) (NIPBL), A, mRNA.                                |
| KIDINS220 | -0.29 | -1.05 NM_020738.1    | Homo sapiens kinase D-interacting substrate of 220 kDa (KIDINS220), mRNA.                            |
| ANKMY1    | -0.29 | -1.01 NM_017844.2    | Homo sapiens ankyrin repeat and MYND domain containing 1 (ANKMY1), 2, mRNA.                          |
| MAT2A     | -0.28 | -1.16 NM_005911.4    | Homo sapiens methionine adenosyltransferase II, alpha (MAT2A), mRNA.                                 |
| AAAS      | -0.28 | -1.02 NM_015665.4    | Homo sapiens achalasia, adrenocortical insufficiency, alacrimia (Allgrove, triple-A) (AAAS), mRNA.   |
| LOC389203 | -0.28 | 1.01 XM_001131316.1  | PREDICTED: Homo sapiens hypothetical gene supported by BC032431 (LOC389203), mRNA.                   |
| C6orf48   | -0.27 | -1.13 NM_001040437.1 | Homo sapiens chromosome 6 open reading frame 48 (C6orf48), 1, mRNA.                                  |
| GCNT2     | -0.26 | 1.03 NM_145649.2     | Homo sapiens glucosaminyl (N-acetyl) transferase 2, I-branching enzyme (GCNT2), 1, mRNA.             |
| GLRX5     | -0.26 | -1.13 NM_016417.2    | Homo sapiens glutaredoxin 5 (GLRX5), mRNA.                                                           |
| CCDC25    | -0.26 | -1.03 NM_018246.2    | Homo sapiens coiled-coil domain containing 25 (CCDC25), mRNA.                                        |
| TPI1      | -0.24 | -1.16 NM_000365.4    | Homo sapiens triosephosphate isomerase 1 (TPI1), mRNA.                                               |
| TSC1      | -0.23 | -1.04 NM_000368.3    | Homo sapiens tuberous sclerosis 1 (TSC1), 1, mRNA.                                                   |
| PSMC6     | -0.22 | 1.02 NM_002806.2     | Homo sapiens proteasome (prosome, macropain) 26S subunit, ATPase, 6 (PSMC6), mRNA.                   |
| SF1       | -0.21 | -1.01 NM_004630.2    | Homo sapiens splicing factor 1 (SF1), 1, mRNA.                                                       |
| CCT7      | -0.21 | -1.14 NM_001009570.1 | Homo sapiens chaperonin containing TCP1, subunit 7 (eta) (CCT7), 2, mRNA.                            |
| MORN2     | -0.2  | -1.04 NM_194270.1    | Homo sapiens MORN repeat containing 2 (MORN2), mRNA.                                                 |
| KIAA1128  | -0.2  | 1 NM_018999.2        | Homo sapiens KIAA1128 (KIAA1128), mRNA.                                                              |
| CRSP9     | -0.19 | -1 NM_004270.3       | Homo sapiens cofactor required for Sp1 transcriptional activation, subunit 9, 33kDa (CRSP9), mRNA.   |
| LOC644310 | -0.19 | -1.02 XM_938150.2    | PREDICTED: Homo sapiens similar to ubiquinol-cytochrome c reductase complex (LOC644310), mRNA.       |
| FLJ11171  | -0.18 | -1.01 NM_018348.5    | Homo sapiens hypothetical protein FLJ11171 (FLJ11171), 1, mRNA.                                      |
| CLASP1    | -0.13 | -1.03 NM_015282.1    | Homo sapiens cytoplasmic linker associated protein 1 (CLASP1), mRNA.                                 |
| CECR7     | -0.13 | 1 XM_927968.1        | PREDICTED: Homo sapiens cat eye syndrome chromosome region, candidate 7 (CECR7), mRNA.               |
| EML1      | -0.12 | 1 NM_004434.2        | Homo sapiens echinoderm microtubule associated protein like 1 (EML1), 2, mRNA.                       |
| PTPDC1    | -0.12 | 1.02 NM_152422.3     | Homo sapiens protein tyrosine phosphatase domain containing 1 (PTPDC1), 1, mRNA.                     |
| CAV1      | -0.12 | 1.02 NM_001753.3     | Homo sapiens caveolin 1, caveolae protein, 22kDa (CAV1), mRNA.                                       |
| KIAA1429  | -0.12 | -1.02 NM_015496.3    | Homo sapiens KIAA1429 (KIAA1429), 1, mRNA.                                                           |
| KIAA0430  | -0.1  | -1.02 NM_014647.2    | Homo sapiens KIAA0430 (KIAA0430), mRNA.                                                              |
| LOC440030 | -0.07 | -1.02 XM_498510.2    | PREDICTED: Homo sapiens hypothetical LOC440030 (LOC440030), mRNA.                                    |
| LOC401052 | -0.06 | 1.02 NM_001008737.1  | Homo sapiens hypothetical LOC401052 (LOC401052), mRNA.                                               |
| LAMP1     | -0.06 | -1.1 NM_005561.2     | Homo sapiens lysosomal-associated membrane protein 1 (LAMP1), mRNA.                                  |
| S100PBP   | -0.06 | 1.03 NM_022753.2     | Homo sapiens S100P binding protein (S100PBP), 1, mRNA.                                               |
| PAN2      | -0.04 | 1.02 NM_014871.2     | Homo sapiens PAN2 polyA specific ribonuclease subunit homolog ( <i>S. cerevisiae</i> ) (PAN2), mRNA. |
| KIAA0892  | -0.03 | 1.01 NM_015329.3     | Homo sapiens KIAA0892 (KIAA0892), mRNA.                                                              |
| PKD1      | -0.02 | 1.06 NM_001009944.1  | Homo sapiens polycystic kidney disease 1 (autosomal dominant) (PKD1), 1, mRNA.                       |
| PPP2CA    | 0     | -1.11 NM_002715.2    | Homo sapiens protein phosphatase 2 (formerly 2A), catalytic subunit, alpha isoform (PPP2CA), mRNA.   |
| FKBP3     | 0.01  | 1.05 NM_002013.2     | Homo sapiens FK506 binding protein 3, 25kDa (FKBP3), mRNA.                                           |
| CLTC      | 0.02  | 1.02 NM_004859.3     | Homo sapiens clathrin, heavy chain (Hc) (CLTC), mRNA.                                                |
| IRAK1BP1  | 0.03  | 1.06 NM_001010844.1  | Homo sapiens interleukin-1 receptor-associated kinase 1 binding protein 1 (IRAK1BP1), mRNA.          |
| PHC1      | 0.03  | 1.05 NM_004426.2     | Homo sapiens polyhomeotic homolog 1 ( <i>Drosophila</i> ) (PHC1), mRNA.                              |
| PAPSS2    | 0.06  | -1.02 NM_004670.3    | Homo sapiens 3'-phosphoadenosine 5'-phosphosulfate synthase 2 (PAPSS2), 1, mRNA.                     |
| UBL7      | 0.07  | 1.05 NM_032907.3     | Homo sapiens ubiquitin-like 7 (bone marrow stromal cell-derived) (UBL7), 1, mRNA.                    |
| RPL36     | 0.08  | 1.05 NM_015414.2     | Homo sapiens ribosomal protein L36 (RPL36), 2, mRNA.                                                 |
| PQLC1     | 0.08  | -1.02 NM_025078.3    | Homo sapiens PQ loop repeat containing 1 (PQLC1), mRNA.                                              |

|           |      |                      |                                                                                                                    |
|-----------|------|----------------------|--------------------------------------------------------------------------------------------------------------------|
| WDR91     | 0.09 | 1.07 NM_014149.2     | Homo sapiens WD repeat domain 91 (WDR91), mRNA.                                                                    |
|           | 0.1  | 1.06 AK125150        | Homo sapiens cDNA FLJ43160 fis, clone FCBBF2000199                                                                 |
| FRAP1     | 0.11 | 1 NM_004958.2        | Homo sapiens FK506 binding protein 12-rapamycin associated protein 1 (FRAP1), mRNA.                                |
| WDR23     | 0.11 | 1.05 NM_025230.3     | Homo sapiens WD repeat domain 23 (WDR23), 1, mRNA.                                                                 |
| ENTPD4    | 0.12 | 1.07 NM_004901.2     | Homo sapiens ectonucleoside triphosphate diphosphohydrolase 4 (ENTPD4), mRNA.                                      |
| ZBTB8OS   | 0.13 | 1.05 NM_178547.2     | Homo sapiens zinc finger and BTB domain containing 8 opposite strand (ZBTB8OS), mRNA.                              |
| PHKB      | 0.13 | -1.01 NM_001031835.1 | Homo sapiens phosphorylase kinase, beta (PHKB), 2, mRNA.                                                           |
| HIST2H2AC | 0.14 | 1.04 NM_003517.2     | Homo sapiens histone cluster 2, H2ac (HIST2H2AC), mRNA.                                                            |
| C14orf43  | 0.15 | 1.03 NM_194278.3     | Homo sapiens chromosome 14 open reading frame 43 (C14orf43), 1, mRNA.                                              |
| LOC283874 | 0.15 | 1.08 NM_001012731.1  | Homo sapiens hypothetical protein LOC283874 (LOC283874), mRNA.                                                     |
| GNPNAT1   | 0.17 | 1.06 NM_198066.2     | Homo sapiens glucosamine-phosphate N-acetyltransferase 1 (GNPNAT1), mRNA.                                          |
| SRGAP2    | 0.18 | 1.08 NM_015326.2     | Homo sapiens SLIT-ROBO Rho GTPase activating protein 2 (SRGAP2), 1, mRNA.                                          |
| SVIL      | 0.18 | 1 NM_003174.3        | Homo sapiens supervillin (SVIL), 1, mRNA.                                                                          |
| JARID1B   | 0.19 | -1.01 NM_006618.3    | Homo sapiens jumonji, AT rich interactive domain 1B (JARID1B), mRNA.                                               |
| DNMT3B    | 0.19 | 1.05 NM_006892.3     | Homo sapiens DNA (cytosine-5-)-methyltransferase 3 beta (DNMT3B), 1, mRNA.                                         |
| CALU      | 0.19 | 1 NM_001219.2        | Homo sapiens calumenin (CALU), mRNA.                                                                               |
| MAP2K4    | 0.21 | 1.09 NM_003010.2     | Homo sapiens mitogen-activated protein kinase kinase 4 (MAP2K4), mRNA.                                             |
| LOC653604 | 0.21 | 1.09 XM_497711.2     | PREDICTED: Homo sapiens similar to H3 histone, family 2 isoform 2 (LOC653604), mRNA.                               |
| LOC401321 | 0.21 | 1.08 XM_379483.3     | PREDICTED: Homo sapiens hypothetical LOC401321 (LOC401321), mRNA.                                                  |
| DHDDS     | 0.23 | 1.09 NM_205861.1     | Homo sapiens dehydrodolichyl diphosphate synthase (DHDDS), 2, mRNA.                                                |
| HEATR5B   | 0.23 | 1.04 NM_019024.1     | Homo sapiens HEAT repeat containing 5B (HEATR5B), mRNA.                                                            |
| IMMP2L    | 0.24 | 1.06 NM_032549.2     | Homo sapiens IMP2 inner mitochondrial membrane peptidase-like ( <i>S. cerevisiae</i> ) (IMMP2L), mRNA.             |
| LRG1      | 0.25 | 1.05 NM_052972.2     | Homo sapiens leucine-rich alpha-2-glycoprotein 1 (LRG1), mRNA.                                                     |
| RCE1      | 0.26 | 1.08 NM_001032279.1  | Homo sapiens RCE1 homolog, prenyl protein peptidase ( <i>S. cerevisiae</i> ) (RCE1), 2, mRNA.                      |
| ARPP-19   | 0.27 | 1.06 NM_006628.4     | Homo sapiens cyclic AMP phosphoprotein, 19 kD (ARPP-19), mRNA.                                                     |
| GALNS     | 0.27 | 1.1 NM_000512.3      | Homo sapiens galactosamine (N-acetyl)-6-sulfate sulfatase (Morquio syndrome, mucopolysaccharidosis type IVA)       |
| LOC388789 | 0.27 | 1.02 XM_939954.2     | PREDICTED: Homo sapiens hypothetical gene supported by AF147354 (LOC388789), mRNA.                                 |
| SNORD33   | 0.27 | 1.09 NR_000020.1     | Homo sapiens small nucleolar RNA, C/D box 33 (SNORD33) on chromosome 19.                                           |
| BET1L     | 0.28 | 1.11 NM_016526.3     | Homo sapiens blocked early in transport 1 homolog ( <i>S. cerevisiae</i> )-like (BET1L), mRNA.                     |
| VPS36     | 0.3  | 1.06 NM_016075.2     | Homo sapiens vacuolar protein sorting 36 homolog ( <i>S. cerevisiae</i> ) (VPS36), mRNA.                           |
| LPCAT1    | 0.3  | 1.04 NM_024830.3     | Homo sapiens lysophosphatidylcholine acyltransferase 1 (LPCAT1), mRNA.                                             |
| LOC440737 | 0.3  | -1.06 XM_496446.3    | PREDICTED: Homo sapiens similar to 60S ribosomal protein L35 (LOC440737), mRNA.                                    |
| LOC653071 | 0.33 | 1.08 XM_930721.1     | PREDICTED: Homo sapiens similar to CG32820-PA, isoform A, 5 (LOC653071), mRNA.                                     |
| ZNF518A   | 0.34 | 1.11 NM_014803.3     | Homo sapiens zinc finger protein 518A (ZNF518A), mRNA.                                                             |
| RALY      | 0.37 | 1.04 NM_007367.2     | Homo sapiens RNA binding protein, autoantigenic (hnRNP-associated with lethal yellow homolog (mouse))              |
| HRK       | 0.38 | 1.1 NM_003806.1      | Homo sapiens harakiri, BCL2 interacting protein (contains only BH3 domain) (HRK), mRNA.                            |
| FTO       | 0.38 | 1.1 NM_001080432.1   | Homo sapiens fat mass and obesity associated (FTO), mRNA.                                                          |
| CAP1      | 0.39 | -1.03 NM_006367.2    | Homo sapiens CAP, adenylate cyclase-associated protein 1 (yeast) (CAP1), mRNA.                                     |
| CUL4B     | 0.4  | 1.09 NM_001079872.1  | Homo sapiens cullin 4B (CUL4B), 2, mRNA.                                                                           |
| TTC23     | 0.41 | 1.13 NM_001040658.1  | Homo sapiens tetratricopeptide repeat domain 23 (TTC23), 5, mRNA.                                                  |
| DSP       | 0.42 | 1.13 NM_001008844.1  | Homo sapiens desmoplakin (DSP), 2, mRNA.                                                                           |
| PCBP1     | 0.43 | -1.04 NM_006196.2    | Homo sapiens poly(rC) binding protein 1 (PCBP1), mRNA.                                                             |
| LGLL338   | 0.43 | 1.13 NM_001039792.1  | Homo sapiens hypothetical protein LOC646962 (LGLL338), mRNA.                                                       |
| PARP4     | 0.44 | 1.02 NM_006437.3     | Homo sapiens poly (ADP-ribose) polymerase family, member 4 (PARP4), mRNA.                                          |
| SYNJ2BP   | 0.44 | 1.09 NM_018373.1     | Homo sapiens synaptojanin 2 binding protein (SYNJ2BP), mRNA.                                                       |
| BRWD2     | 0.44 | 1.08 NM_018117.10    | Homo sapiens bromodomain and WD repeat domain containing 2 (BRWD2), mRNA.                                          |
| COPG2     | 0.45 | 1.11 NM_012133.2     | Homo sapiens coatamer protein complex, subunit gamma 2 (COPG2), mRNA.                                              |
| CELSR2    | 0.47 | 1.07 NM_001408.1     | Homo sapiens cadherin, EGF LAG seven-pass G-type receptor 2 (flamingo homolog, <i>Drosophila</i> ) (CELSR2), mRNA. |
| GLTSCR1   | 0.47 | 1.11 NM_015711.2     | Homo sapiens glioma tumor suppressor candidate region gene 1 (GLTSCR1), mRNA.                                      |

|           |      |                     |                                                                                                             |
|-----------|------|---------------------|-------------------------------------------------------------------------------------------------------------|
| RALGPS1   | 0.48 | 1.15 NM_014636.1    | Homo sapiens Ral GEF with PH domain and SH3 binding motif 1 (RALGPS1), mRNA.                                |
| CHD7      | 0.49 | 1.06 NM_017780.2    | Homo sapiens chromodomain helicase DNA binding protein 7 (CHD7), mRNA.                                      |
| LOC648526 | 0.49 | 1.1 XM_937579.1     | PREDICTED: Homo sapiens similar to epiplakin 1 (LOC648526), mRNA.                                           |
| CNPY3     | 0.49 | 1.11 NM_006586.3    | Homo sapiens canopy 3 homolog (zebrafish) (CNPY3), mRNA.                                                    |
| TMEM16F   | 0.5  | 1.05 NM_001025356.1 | Homo sapiens transmembrane protein 16F (TMEM16F), mRNA.                                                     |
| HEATR5B   | 0.51 | 1.11 NM_019024.1    | Homo sapiens HEAT repeat containing 5B (HEATR5B), mRNA.                                                     |
| LUZP1     | 0.52 | 1.04 NM_033631.2    | Homo sapiens leucine zipper protein 1 (LUZP1), mRNA.                                                        |
| MPZL1     | 0.53 | 1.06 NM_024569.3    | Homo sapiens myelin protein zero-like 1 (MPZL1), 2, mRNA.                                                   |
| ELF3      | 0.56 | 1.07 NM_004433.3    | Homo sapiens E74-like factor 3 (ets domain transcription factor, epithelial-specific ) (ELF3), mRNA.        |
| EEF1D     | 0.57 | 1.02 NM_032378.2    | Homo sapiens eukaryotic translation elongation factor 1 delta (guanine nucleotide exchange protein) (EEF1D) |
| NUDT6     | 0.57 | 1.13 NM_007083.3    | Homo sapiens nudix (nucleoside diphosphate linked moiety X)-type motif 6 (NUDT6), 1, mRNA.                  |
| RPL26L1   | 0.58 | 1.07 NM_016093.2    | Homo sapiens ribosomal protein L26-like 1 (RPL26L1), mRNA.                                                  |
| APEX1     | 0.59 | 1.04 NM_001641.2    | Homo sapiens APEX nuclease (multifunctional DNA repair enzyme) 1 (APEX1), 1, mRNA.                          |
| LRRC41    | 0.6  | 1.11 NM_006369.4    | Homo sapiens leucine rich repeat containing 41 (LRRC41), mRNA.                                              |
| GLO1      | 0.6  | 1 NM_006708.2       | Homo sapiens glyoxalase I (GLO1), mRNA.                                                                     |
| PARVA     | 0.62 | 1.14 NM_018222.2    | Homo sapiens parvin, alpha (PARVA), mRNA.                                                                   |
| LOC643433 | 0.62 | -1 XM_928197.1      | PREDICTED: Homo sapiens similar to 60S ribosomal protein L29 (Cell surface heparin binding protein HIP)     |
| SLC26A2   | 0.63 | 1.17 NM_000112.3    | Homo sapiens solute carrier family 26 (sulfate transporter), member 2 (SLC26A2), mRNA.                      |
| TOX4      | 0.63 | 1.17 NM_014828.2    | Homo sapiens TOX high mobility group box family member 4 (TOX4), mRNA.                                      |
| TP53BP1   | 0.63 | 1.09 NM_005657.1    | Homo sapiens tumor protein p53 binding protein 1 (TP53BP1), mRNA.                                           |
| ZMYND8    | 0.64 | 1.13 NM_183047.1    | Homo sapiens zinc finger, MYND-type containing 8 (ZMYND8), 1, mRNA.                                         |
| FUNDC1    | 0.64 | 1.09 NM_173794.2    | Homo sapiens FUN14 domain containing 1 (FUNDC1), mRNA.                                                      |
| TLN1      | 0.65 | 1.11 NM_006289.2    | Homo sapiens talin 1 (TLN1), mRNA.                                                                          |
| C9orf46   | 0.65 | 1.09 NM_018465.2    | Homo sapiens chromosome 9 open reading frame 46 (C9orf46), mRNA.                                            |
| BBS1      | 0.67 | 1.15 NM_024649.4    | Homo sapiens Bardet-Biedl syndrome 1 (BBS1), mRNA.                                                          |
| DNER      | 0.7  | 1.13 NM_139072.3    | Homo sapiens delta/notch-like EGF repeat containing (DNER), mRNA.                                           |
| RBMS2     | 0.71 | 1.17 NM_002898.2    | Homo sapiens RNA binding motif, single stranded interacting protein 2 (RBMS2), mRNA.                        |
| GRB2      | 0.72 | 1.12 NM_002086.3    | Homo sapiens growth factor receptor-bound protein 2 (GRB2), 1, mRNA.                                        |
| ATXN1     | 0.72 | 1.19 NM_000332.2    | Homo sapiens ataxin 1 (ATXN1), mRNA.                                                                        |
| SLC41A3   | 0.73 | 1.1 NM_017836.3     | Homo sapiens solute carrier family 41, member 3 (SLC41A3), 2, mRNA.                                         |
| CPEB2     | 0.73 | 1.19 NM_182646.1    | Homo sapiens cytoplasmic polyadenylation element binding protein 2 (CPEB2), A, mRNA.                        |
| MTMR10    | 0.74 | 1.13 NM_017762.2    | Homo sapiens myotubularin related protein 10 (MTMR10), mRNA.                                                |
| LOC127295 | 0.75 | 1.05 XM_060417.3    | PREDICTED: Homo sapiens similar to 60S ribosomal protein L36 (LOC127295), mRNA.                             |
| GKN2      | 0.76 | 1.2 NM_182536.2     | Homo sapiens gastrokine 2 (GKN2), mRNA.                                                                     |
| RDX       | 0.77 | 1.1 NM_002906.3     | Homo sapiens radixin (RDX), mRNA.                                                                           |
| LRRC8A    | 0.78 | 1.14 NM_019594.2    | Homo sapiens leucine rich repeat containing 8 family, member A (LRRC8A), mRNA.                              |
| TGFBR1    | 0.79 | 1.18 NM_004612.2    | Homo sapiens transforming growth factor, beta receptor I (TGFBR1), mRNA.                                    |
| FARP1     | 0.79 | 1.11 NM_005766.2    | Homo sapiens FERM, RhoGEF (ARHGEF) and pleckstrin domain protein 1 (chondrocyte-derived) (FARP1), 1, mRNA.  |
| LOC644799 | 0.79 | 1.13 XM_934554.1    | PREDICTED: Homo sapiens hypothetical protein LOC644799, 1 (LOC644799), mRNA.                                |
| ALDH5A1   | 0.8  | 1.17 NM_001080.3    | Homo sapiens aldehyde dehydrogenase 5 family, member A1 (succinate-semialdehyde dehydrogenase) (ALDH5A1)    |
| AFF1      | 0.8  | 1.14 NM_005935.1    | Homo sapiens AF4/FMR2 family, member 1 (AFF1), mRNA.                                                        |
| IKIP      | 0.81 | 1.19 NM_201612.1    | Homo sapiens IKK interacting protein (IKIP), 2, mRNA.                                                       |
| PPP1R12A  | 0.81 | 1.15 NM_002480.1    | Homo sapiens protein phosphatase 1, regulatory (inhibitor) subunit 12A (PPP1R12A), mRNA.                    |
| MARVELD2  | 0.81 | 1.21 NM_144724.1    | Homo sapiens MARVEL domain containing 2 (MARVELD2), 2, mRNA.                                                |
| ZFX       | 0.82 | 1.15 NM_003410.2    | Homo sapiens zinc finger protein, X-linked (ZFX), mRNA.                                                     |
| CDC37     | 0.82 | 1.02 NM_007065.3    | Homo sapiens cell division cycle 37 homolog (S. cerevisiae) (CDC37), mRNA.                                  |
| ERCC5     | 0.83 | 1.11 NM_000123.2    | Homo sapiens excision repair cross-complementing rodent repair deficiency, complementation group 5          |
| LOC645385 | 0.83 | 1.04 XM_928427.1    | PREDICTED: Homo sapiens similar to heterogeneous nuclear ribonucleoprotein A1 (LOC645385), mRNA.            |
| SNORD25   | 0.83 | 1.21 NR_002565.1    | Homo sapiens small nucleolar RNA, C/D box 25 (SNORD25) on chromosome 11.                                    |

|           |      |                     |                                                                                                           |
|-----------|------|---------------------|-----------------------------------------------------------------------------------------------------------|
| U2AF1     | 0.84 | 1.12 NM_001025203.1 | Homo sapiens U2 small nuclear RNA auxiliary factor 1 (U2AF1), b, mRNA.                                    |
| INADL     | 0.84 | 1.19 NM_176878.1    | Homo sapiens InaD-like (Drosophila) (INADL), 4, mRNA.                                                     |
|           | 0.85 | 1.21 AK128481       | Homo sapiens cDNA FLJ46626 fis, clone TRACH2001612                                                        |
| LONRF1    | 0.87 | 1.19 NM_152271.3    | Homo sapiens LON peptidase N-terminal domain and ring finger 1 (LONRF1), mRNA.                            |
| NCBP2     | 0.88 | 1.15 NM_007362.3    | Homo sapiens nuclear cap binding protein subunit 2, 20kDa (NCBP2), 1, mRNA.                               |
| KDELR2    | 0.88 | 1.11 NM_006854.3    | Homo sapiens KDEL (Lys-Asp-Glu-Leu) endoplasmic reticulum protein retention receptor 2 (KDELR2), 1, mRNA. |
| GGA3      | 0.88 | 1.19 NM_014001.2    | Homo sapiens golgi associated, gamma adaptin ear containing, ARF binding protein 3 (GGA3), short, mRNA.   |
| C20orf108 | 0.88 | 1.19 NM_080821.2    | Homo sapiens chromosome 20 open reading frame 108 (C20orf108), mRNA.                                      |
| PGAM4     | 0.89 | 1.11 NM_001029891.2 | Homo sapiens phosphoglycerate mutase family member 4 (PGAM4), mRNA.                                       |
| 9-Sep     | 0.9  | 1.05 NM_006640.3    | Homo sapiens septin 9 (SEPT9), mRNA.                                                                      |
| CD81      | 0.91 | 1.04 NM_004356.3    | Homo sapiens CD81 molecule (CD81), mRNA.                                                                  |
| UQCRC2    | 0.92 | 1.14 NM_003366.2    | Homo sapiens ubiquinol-cytochrome c reductase core protein II (UQCRC2), mRNA.                             |
| SUOX      | 0.92 | 1.17 NM_001032386.1 | Homo sapiens sulfite oxidase (SUOX), 2, mRNA.                                                             |
| EMP3      | 0.92 | 1.08 NM_001425.1    | Homo sapiens epithelial membrane protein 3 (EMP3), mRNA.                                                  |
| LYK5      | 0.93 | 1.16 NM_001003786.1 | Homo sapiens protein kinase LYK5 (LYK5), 2, mRNA.                                                         |
| ALPK2     | 0.93 | 1.17 NM_052947.3    | Homo sapiens alpha-kinase 2 (ALPK2), mRNA.                                                                |
| ZSWIM3    | 0.93 | 1.21 NM_080752.2    | Homo sapiens zinc finger, SWIM-type containing 3 (ZSWIM3), mRNA.                                          |
| TMEM63B   | 0.94 | 1.2 NM_018426.1     | Homo sapiens transmembrane protein 63B (TMEM63B), mRNA.                                                   |
| LOC648638 | 0.94 | 1.17 XM_937706.1    | PREDICTED: Homo sapiens similar to Peptidyl-prolyl cis-trans isomerase NIMA-interacting 4 (Rotamase Pin4) |
| C20orf70  | 0.95 | 1.21 NM_080574.2    | Homo sapiens chromosome 20 open reading frame 70 (C20orf70), mRNA.                                        |
| ZNF593    | 0.96 | 1.14 NM_015871.3    | Homo sapiens zinc finger protein 593 (ZNF593), mRNA.                                                      |
| OSBPL3    | 0.96 | 1.18 NM_145322.1    | Homo sapiens oxysterol binding protein-like 3 (OSBPL3), 4, mRNA.                                          |
| RNF10     | 0.96 | 1.19 NM_014868.3    | Homo sapiens ring finger protein 10 (RNF10), mRNA.                                                        |
| KIF13B    | 0.97 | 1.19 NM_015254.2    | Homo sapiens kinesin family member 13B (KIF13B), mRNA.                                                    |
| PCSK7     | 0.98 | 1.18 NM_004716.2    | Homo sapiens proprotein convertase subtilisin/kexin type 7 (PCSK7), mRNA.                                 |
| TTC23     | 0.98 | 1.18 NM_022905.4    | Homo sapiens tetratricopeptide repeat domain 23 (TTC23), 2, mRNA.                                         |
| RFWD2     | 0.99 | 1.12 NM_022457.5    | Homo sapiens ring finger and WD repeat domain 2 (RFWD2), 1, mRNA.                                         |
| SCYL1     | 0.99 | 1.1 NM_020680.3     | Homo sapiens SCY1-like 1 (S. cerevisiae) (SCYL1), A, mRNA.                                                |
| CTSC      | 0.99 | 1.13 NM_001814.2    | Homo sapiens cathepsin C (CTSC), 1, mRNA.                                                                 |
| APLP2     | 0.99 | 1.16 NM_001642.1    | Homo sapiens amyloid beta (A4) precursor-like protein 2 (APLP2), mRNA.                                    |
| PPAPDC2   | 1    | 1.23 NM_203453.2    | Homo sapiens phosphatidic acid phosphatase type 2 domain containing 2 (PPAPDC2), mRNA.                    |
| LAPTM4B   | 1.01 | 1.07 NM_018407.4    | Homo sapiens lysosomal associated protein transmembrane 4 beta (LAPTM4B), mRNA.                           |
| RAPH1     | 1.01 | 1.17 NM_213589.1    | Homo sapiens Ras association (RalGDS/AF-6) and pleckstrin homology domains 1 (RAPH1), 1, mRNA.            |
| NUP50     | 1.01 | 1.17 NM_007172.3    | Homo sapiens nucleoporin 50kDa (NUP50), 2, mRNA.                                                          |
| SLC35B1   | 1.02 | 1.11 NM_005827.1    | Homo sapiens solute carrier family 35, member B1 (SLC35B1), mRNA.                                         |
| ACOT8     | 1.02 | 1.23 NM_005469.2    | Homo sapiens acyl-CoA thioesterase 8 (ACOT8), 1, mRNA.                                                    |
| PGAM1     | 1.03 | 1.09 NM_002629.2    | Homo sapiens phosphoglycerate mutase 1 (brain) (PGAM1), mRNA.                                             |
| CFB       | 1.03 | 1.19 NM_001710.4    | Homo sapiens complement factor B (CFB), mRNA.                                                             |
| NLGN4X    | 1.03 | 1.2 NM_020742.2     | Homo sapiens neuroligin 4, X-linked (NLGN4X), 1, mRNA.                                                    |
| NOL7      | 1.04 | 1.06 NM_016167.3    | Homo sapiens nucleolar protein 7, 27kDa (NOL7), mRNA.                                                     |
| PPP1CA    | 1.05 | 1.13 NM_001008709.1 | Homo sapiens protein phosphatase 1, catalytic subunit, alpha isoform (PPP1CA), 3, mRNA.                   |
| CSAD      | 1.05 | 1.19 NM_015989.3    | Homo sapiens cysteine sulfinic acid decarboxylase (CSAD), mRNA.                                           |
| PRKCZ     | 1.06 | 1.23 NM_002744.4    | Homo sapiens protein kinase C, zeta (PRKCZ), 1, mRNA.                                                     |
| ADAR      | 1.07 | 1.13 NM_015840.2    | Homo sapiens adenosine deaminase, RNA-specific (ADAR), 2, mRNA.                                           |
|           | 1.07 | 1.17 BX641108       | Homo sapiens mRNA; cDNA DKFZp779O0231 (from clone DKFZp779O0231)                                          |
| EDEM2     | 1.07 | 1.19 NM_018217.1    | Homo sapiens ER degradation enhancer, mannosidase alpha-like 2 (EDEM2), mRNA.                             |
| BAT2D1    | 1.07 | 1.13 NM_015172.3    | Homo sapiens BAT2 domain containing 1 (BAT2D1), mRNA.                                                     |
| SSBP3     | 1.08 | 1.24 NM_018070.3    | Homo sapiens single stranded DNA binding protein 3 (SSBP3), 2, mRNA.                                      |
| ARCN1     | 1.09 | 1.13 NM_001655.3    | Homo sapiens archain 1 (ARCN1), mRNA.                                                                     |

|           |      |                     |                                                                                                       |
|-----------|------|---------------------|-------------------------------------------------------------------------------------------------------|
| THEM4     | 1.09 | 1.24 NM_053055.3    | Homo sapiens thioesterase superfamily member 4 (THEM4), mRNA.                                         |
| INTS8     | 1.1  | 1.2 NM_017864.2     | Homo sapiens integrator complex subunit 8 (INTS8), mRNA.                                              |
| AFAP1     | 1.11 | 1.18 NM_198595.2    | Homo sapiens actin filament associated protein 1 (AFAP1), 2, mRNA.                                    |
| DISP1     | 1.14 | 1.2 NM_032890.2     | Homo sapiens dispatched homolog 1 (Drosophila) (DISP1), mRNA.                                         |
| SDF4      | 1.14 | 1.17 NM_016547.1    | Homo sapiens stromal cell derived factor 4 (SDF4), mRNA.                                              |
| ZNF585A   | 1.15 | 1.27 NM_152655.2    | Homo sapiens zinc finger protein 585A (ZNF585A), 1, mRNA.                                             |
| C10orf114 | 1.17 | 1.26 NM_001010911.1 | Homo sapiens chromosome 10 open reading frame 114 (C10orf114), mRNA.                                  |
| FAM38B    | 1.18 | 1.2 NM_022068.1     | Homo sapiens family with sequence similarity 38, member B (FAM38B), mRNA.                             |
| ZMYND8    | 1.19 | 1.24 NM_183048.1    | Homo sapiens zinc finger, MYND-type containing 8 (ZMYND8), 3, mRNA.                                   |
| STOX2     | 1.19 | 1.2 NM_020225.1     | Homo sapiens storkhead box 2 (STOX2), mRNA.                                                           |
| ARSG      | 1.2  | 1.28 NM_014960.2    | Homo sapiens arylsulfatase G (ARSG), mRNA.                                                            |
| GDE1      | 1.2  | 1.2 NM_016641.3     | Homo sapiens glycerophosphodiester phosphodiesterase 1 (GDE1), mRNA.                                  |
| NLGN4X    | 1.2  | 1.2 NM_020742.2     | Homo sapiens neuroligin 4, X-linked (NLGN4X), 1, mRNA.                                                |
| FBLN5     | 1.2  | 1.27 NM_006329.2    | Homo sapiens fibulin 5 (FBLN5), mRNA.                                                                 |
| VPS8      | 1.2  | 1.22 NM_015303.3    | Homo sapiens vacuolar protein sorting 8 homolog (S. cerevisiae) (VPS8), 2, mRNA.                      |
| DIO2      | 1.22 | 1.18 NM_001007023.2 | Homo sapiens deiodinase, iodothyronine, type II (DIO2), 3, mRNA.                                      |
| ATXN1     | 1.23 | 1.25 NM_000332.2    | Homo sapiens ataxin 1 (ATXN1), mRNA.                                                                  |
| ZKSCAN3   | 1.24 | 1.28 NM_024493.1    | Homo sapiens zinc finger with KRAB and SCAN domains 3 (ZKSCAN3), mRNA.                                |
| ARHGAP21  | 1.25 | 1.14 NM_020824.2    | Homo sapiens Rho GTPase activating protein 21 (ARHGAP21), mRNA.                                       |
| RERE      | 1.26 | 1.25 NM_012102.3    | Homo sapiens arginine-glutamic acid dipeptide (RE) repeats (RERE), 1, mRNA.                           |
| COMMD1    | 1.26 | 1.2 NM_152516.2     | Homo sapiens copper metabolism (Murr1) domain containing 1 (COMMD1), mRNA.                            |
| NSF       | 1.27 | 1.22 NM_006178.1    | Homo sapiens N-ethylmaleimide-sensitive factor (NSF), mRNA.                                           |
|           | 1.27 | 1.21 AK094914       | Homo sapiens cDNA FLJ37595 fis, clone BRCOC2007864                                                    |
| CRB1      | 1.29 | 1.27 NM_201253.1    | Homo sapiens crumbs homolog 1 (Drosophila) (CRB1), mRNA.                                              |
|           | 1.3  | 1.26 BG698090       | 602659965F1 NCI_CGAP_Skn3 Homo sapiens cDNA clone IMAGE:4802969 5, mRNA sequence                      |
| CEBPB     | 1.32 | 1.12 NM_005194.2    | Homo sapiens CCAAT/enhancer binding protein (C/EBP), beta (CEBPB), mRNA.                              |
| FAM103A1  | 1.32 | 1.23 NM_031452.2    | Homo sapiens family with sequence similarity 103, member A1 (FAM103A1), mRNA.                         |
| KRT15     | 1.33 | 1.31 NM_002275.2    | Homo sapiens keratin 15 (KRT15), mRNA.                                                                |
| OBSCN     | 1.33 | 1.3 NM_052843.2     | Homo sapiens obscurin, cytoskeletal calmodulin and titin-interacting RhoGEF (OBSCN), 1, mRNA.         |
| MYPN      | 1.33 | 1.23 NM_032578.1    | Homo sapiens myopalladin (MYPN), mRNA.                                                                |
| NUCB1     | 1.35 | 1.15 NM_006184.3    | Homo sapiens nucleobindin 1 (NUCB1), mRNA.                                                            |
| CCNL1     | 1.38 | 1.24 NM_020307.2    | Homo sapiens cyclin L1 (CCNL1), mRNA.                                                                 |
| MACF1     | 1.38 | 1.24 NM_012090.3    | Homo sapiens microtubule-actin crosslinking factor 1 (MACF1), 1, mRNA.                                |
| VPS39     | 1.39 | 1.31 NM_015289.2    | Homo sapiens vacuolar protein sorting 39 homolog (S. cerevisiae) (VPS39), mRNA.                       |
| CLCN7     | 1.39 | 1.16 NM_001287.3    | Homo sapiens chloride channel 7 (CLCN7), mRNA.                                                        |
| C9orf7    | 1.4  | 1.31 NM_017586.1    | Homo sapiens chromosome 9 open reading frame 7 (C9orf7), mRNA.                                        |
| LZTS2     | 1.41 | 1.3 NM_032429.1     | Homo sapiens leucine zipper, putative tumor suppressor 2 (LZTS2), mRNA.                               |
| CXXC5     | 1.42 | 1.2 NM_016463.5     | Homo sapiens CXXC finger 5 (CXXC5), mRNA.                                                             |
| STX8      | 1.44 | 1.26 NM_004853.1    | Homo sapiens syntaxin 8 (STX8), mRNA.                                                                 |
| MBD1      | 1.46 | 1.32 NM_015845.2    | Homo sapiens methyl-CpG binding domain protein 1 (MBD1), 2, mRNA.                                     |
| SLC24A1   | 1.46 | 1.33 NM_004727.2    | Homo sapiens solute carrier family 24 (sodium/potassium/calcium exchanger), member 1 (SLC24A1), mRNA. |
| SLC9A8    | 1.47 | 1.32 NM_015266.1    | Homo sapiens solute carrier family 9 (sodium/hydrogen exchanger), member 8 (SLC9A8), mRNA.            |
| DMD       | 1.47 | 1.34 NM_004019.1    | Homo sapiens dystrophin (muscular dystrophy, Duchenne and Becker types) (DMD), Dp40, mRNA.            |
| TMEM173   | 1.5  | 1.27 NM_198282.1    | Homo sapiens transmembrane protein 173 (TMEM173), mRNA.                                               |
| RWDD3     | 1.5  | 1.3 NM_015485.4     | Homo sapiens RWD domain containing 3 (RWDD3), mRNA.                                                   |
| TACC2     | 1.5  | 1.27 NM_206861.1    | Homo sapiens transforming, acidic coiled-coil containing protein 2 (TACC2), 2, mRNA.                  |
| ZNF26     | 1.51 | 1.34 NM_019591.2    | Homo sapiens zinc finger protein 26 (ZNF26), mRNA.                                                    |
| DNAJB9    | 1.51 | 1.31 NM_012328.1    | Homo sapiens DnaJ (Hsp40) homolog, subfamily B, member 9 (DNAJB9), mRNA.                              |
| RNF19A    | 1.51 | 1.27 NM_015435.3    | Homo sapiens ring finger protein 19A (RNF19A), 2, mRNA.                                               |

|          |      |                     |                                                                                                                         |
|----------|------|---------------------|-------------------------------------------------------------------------------------------------------------------------|
| ALDH4A1  | 1.51 | 1.34 NM_003748.2    | Homo sapiens aldehyde dehydrogenase 4 family, member A1 (ALDH4A1), P5CDhL, mRNA.                                        |
| KLF6     | 1.51 | 1.26 NM_001300.4    | Homo sapiens Kruppel-like factor 6 (KLF6), 2, mRNA.                                                                     |
| EP300    | 1.51 | 1.26 NM_001429.2    | Homo sapiens E1A binding protein p300 (EP300), mRNA.                                                                    |
| LEMD2    | 1.51 | 1.28 NM_181336.2    | Homo sapiens LEM domain containing 2 (LEMD2), mRNA.                                                                     |
| EPM2AIP1 | 1.51 | 1.32 NM_014805.2    | Homo sapiens EPM2A (laforin) interacting protein 1 (EPM2AIP1), mRNA.                                                    |
| TTC14    | 1.51 | 1.3 NM_001042601.1  | Homo sapiens tetratricopeptide repeat domain 14 (TTC14), 2, mRNA.                                                       |
| PRMT2    | 1.52 | 1.28 NM_001535.2    | Homo sapiens protein arginine methyltransferase 2 (PRMT2), 2, mRNA.                                                     |
| SLC35A2  | 1.52 | 1.35 NM_005660.1    | Homo sapiens solute carrier family 35 (UDP-galactose transporter), member A2 (SLC35A2), 1, mRNA.                        |
| WDR45    | 1.52 | 1.35 NM_001029896.1 | Homo sapiens WD repeat domain 45 (WDR45), 2, mRNA.                                                                      |
| CLDND1   | 1.52 | 1.26 NM_001040181.1 | Homo sapiens claudin domain containing 1 (CLDND1), 1, mRNA.                                                             |
| NHLRC3   | 1.52 | 1.34 NM_001017370.1 | Homo sapiens NHL repeat containing 3 (NHLRC3), 2, mRNA.                                                                 |
| EFEMP1   | 1.53 | 1.18 NM_001039348.1 | Homo sapiens EGF-containing fibulin-like extracellular matrix protein 1 (EFEMP1), 2, mRNA.                              |
| MEIS1    | 1.53 | 1.32 NM_002398.2    | Homo sapiens Meis homeobox 1 (MEIS1), mRNA.                                                                             |
| SPG11    | 1.53 | 1.3 NM_025137.3     | Homo sapiens spastic paraplegia 11 (autosomal recessive) (SPG11), mRNA.                                                 |
| ERLIN2   | 1.53 | 1.32 NM_007175.5    | Homo sapiens ER lipid raft associated 2 (ERLIN2), 1, mRNA.                                                              |
| FAM109A  | 1.53 | 1.34 NM_144671.3    | Homo sapiens family with sequence similarity 109, member A (FAM109A), mRNA.                                             |
| ATP5SL   | 1.53 | 1.24 NM_018035.1    | Homo sapiens ATP5S-like (ATP5SL), mRNA.                                                                                 |
| FLVCR2   | 1.54 | 1.33 NM_017791.1    | Homo sapiens feline leukemia virus subgroup C cellular receptor family, member 2 (FLVCR2), mRNA.                        |
| ZNF613   | 1.54 | 1.35 NM_024840.2    | Homo sapiens zinc finger protein 613 (ZNF613), 2, mRNA.                                                                 |
| SLC39A14 | 1.54 | 1.25 NM_015359.2    | Homo sapiens solute carrier family 39 (zinc transporter), member 14 (SLC39A14), mRNA.                                   |
| SNX25    | 1.54 | 1.26 NM_031953.2    | Homo sapiens sorting nexin 25 (SNX25), mRNA.                                                                            |
| TRPC4AP  | 1.54 | 1.23 NM_015638.2    | Homo sapiens transient receptor potential cation channel, subfamily C                                                   |
| SOD2     | 1.54 | 1.22 NM_001024465.1 | Homo sapiens superoxide dismutase 2, mitochondrial (SOD2), 2, mRNA.                                                     |
|          | 1.54 | 1.33 AK092074       | Homo sapiens cDNA FLJ34755 fis, clone NHNPC1000034                                                                      |
| SLC25A1  | 1.55 | 1.22 NM_005984.1    | Homo sapiens solute carrier family 25 (mitochondrial carrier; citrate transporter), member 1 (SLC25A1), mRNA.           |
| MYH9     | 1.55 | 1.18 NM_002473.3    | Homo sapiens myosin, heavy chain 9, non-muscle (MYH9), mRNA.                                                            |
| SIRT5    | 1.55 | 1.27 NM_012241.2    | Homo sapiens sirtuin (silent mating type information regulation 2 homolog) 5 ( <i>S. cerevisiae</i> ) (SIRT5), 1, mRNA. |
| YIPF3    | 1.55 | 1.24 NM_015388.2    | Homo sapiens Yip1 domain family, member 3 (YIPF3), mRNA.                                                                |
| TACC2    | 1.55 | 1.2 NM_006997.2     | Homo sapiens transforming, acidic coiled-coil containing protein 2 (TACC2), 4, mRNA.                                    |
| UBE2D3   | 1.56 | 1.19 NM_181890.1    | Homo sapiens ubiquitin-conjugating enzyme E2D 3 (UBC4/5 homolog, yeast) (UBE2D3), 6, mRNA.                              |
| ZNF446   | 1.56 | 1.35 NM_017908.2    | Homo sapiens zinc finger protein 446 (ZNF446), mRNA.                                                                    |
| COPG     | 1.56 | 1.22 NM_016128.3    | Homo sapiens coatamer protein complex, subunit gamma (COPG), mRNA.                                                      |
| PSMC4    | 1.56 | 1.25 NM_006503.2    | Homo sapiens proteasome (prosome, macropain) 26S subunit, ATPase, 4 (PSMC4), 1, mRNA.                                   |
| WFDC1    | 1.56 | 1.31 NM_021197.2    | Homo sapiens WAP four-disulfide core domain 1 (WFDC1), mRNA.                                                            |
| LBA1     | 1.56 | 1.35 NM_014831.1    | Homo sapiens lupus brain antigen 1 (LBA1), mRNA.                                                                        |
| PYGB     | 1.56 | 1.3 NM_002862.3     | Homo sapiens phosphorylase, glycogen; brain (PYGB), mRNA.                                                               |
|          | 1.56 | 1.32 AL137321       | Homo sapiens mRNA; cDNA DKFZp434P231 (from clone DKFZp434P231)                                                          |
| C17orf63 | 1.56 | 1.28 NM_001077498.1 | Homo sapiens chromosome 17 open reading frame 63 (C17orf63), 1, mRNA.                                                   |
| TPD52L2  | 1.56 | 1.2 NM_003288.2     | Homo sapiens tumor protein D52-like 2 (TPD52L2), 5, mRNA.                                                               |
| C19orf22 | 1.56 | 1.25 NM_138774.2    | Homo sapiens chromosome 19 open reading frame 22 (C19orf22), mRNA.                                                      |
| FBXW4    | 1.57 | 1.33 NM_022039.3    | Homo sapiens F-box and WD repeat domain containing 4 (FBXW4), mRNA.                                                     |
| TPP1     | 1.57 | 1.28 NM_000391.3    | Homo sapiens tripeptidyl peptidase I (TPP1), mRNA.                                                                      |
| SLC30A1  | 1.57 | 1.26 NM_021194.2    | Homo sapiens solute carrier family 30 (zinc transporter), member 1 (SLC30A1), mRNA.                                     |
| FAM107B  | 1.57 | 1.24 NM_031453.2    | Homo sapiens family with sequence similarity 107, member B (FAM107B), mRNA.                                             |
| MCFD2    | 1.58 | 1.28 NM_139279.3    | Homo sapiens multiple coagulation factor deficiency 2 (MCFD2), mRNA.                                                    |
| CLIC1    | 1.58 | 1.19 NM_001288.4    | Homo sapiens chloride intracellular channel 1 (CLIC1), mRNA.                                                            |
| ASB6     | 1.58 | 1.34 NM_177999.1    | Homo sapiens ankyrin repeat and SOCS box-containing 6 (ASB6), 2, mRNA.                                                  |
| COPE     | 1.58 | 1.24 NM_199444.1    | Homo sapiens coatamer protein complex, subunit epsilon (COPE), 3, mRNA.                                                 |
| REPS2    | 1.58 | 1.34 NM_001080975.1 | Homo sapiens RALBP1 associated Eps domain containing 2 (REPS2), 2, mRNA.                                                |

|           |      |                     |                                                                                                              |
|-----------|------|---------------------|--------------------------------------------------------------------------------------------------------------|
| MLF2      | 1.58 | 1.21 NM_005439.1    | Homo sapiens myeloid leukemia factor 2 (MLF2), mRNA.                                                         |
| RCN2      | 1.58 | 1.23 NM_002902.1    | Homo sapiens reticulocalbin 2, EF-hand calcium binding domain (RCN2), mRNA.                                  |
| C1orf86   | 1.58 | 1.3 NM_182533.2     | Homo sapiens chromosome 1 open reading frame 86 (C1orf86), mRNA.                                             |
| CHMP1A    | 1.59 | 1.24 NM_002768.2    | Homo sapiens chromatin modifying protein 1A (CHMP1A), 2, mRNA.                                               |
| HIAT1     | 1.59 | 1.26 NM_033055.2    | Homo sapiens hippocampus abundant transcript 1 (HIAT1), mRNA.                                                |
| MAP4K4    | 1.59 | 1.31 NM_145687.2    | Homo sapiens mitogen-activated protein kinase kinase kinase kinase 4 (MAP4K4), 3, mRNA.                      |
| LOC732075 | 1.59 | 1.36 XM_001131797.1 | PREDICTED: Homo sapiens similar to pleckstrin homology-like domain, family B, member 1 (LOC732075), mRNA.    |
| DYNLRB1   | 1.6  | 1.24 NM_014183.2    | Homo sapiens dynein, light chain, roadblock-type 1 (DYNLRB1), mRNA.                                          |
| SPRED2    | 1.6  | 1.33 NM_181784.1    | Homo sapiens sprouty-related, EVH1 domain containing 2 (SPRED2), mRNA.                                       |
| MLYCD     | 1.6  | 1.36 NM_012213.2    | Homo sapiens malonyl-CoA decarboxylase (MLYCD), mRNA.                                                        |
| PICALM    | 1.61 | 1.26 NM_007166.2    | Homo sapiens phosphatidylinositol binding clathrin assembly protein (PICALM), 1, mRNA.                       |
| RPN1      | 1.61 | 1.18 NM_002950.3    | Homo sapiens ribophorin I (RPN1), mRNA.                                                                      |
| BCAP31    | 1.61 | 1.19 NM_005745.6    | Homo sapiens B-cell receptor-associated protein 31 (BCAP31), mRNA.                                           |
| GYS1      | 1.61 | 1.32 NM_002103.3    | Homo sapiens glycogen synthase 1 (muscle) (GYS1), mRNA.                                                      |
| PGLS      | 1.61 | 1.24 NM_012088.2    | Homo sapiens 6-phosphogluconolactonase (PGLS), mRNA.                                                         |
| ATP1A1    | 1.61 | 1.23 NM_000701.6    | Homo sapiens ATPase, Na <sup>+</sup> /K <sup>+</sup> transporting, alpha 1 polypeptide (ATP1A1), 1, mRNA.    |
| LOC728417 | 1.61 | 1.37 XM_001130364.1 | PREDICTED: Homo sapiens hypothetical protein LOC728417 (LOC728417), mRNA.                                    |
| BAIAP2    | 1.61 | 1.31 NM_006340.1    | Homo sapiens BAI1-associated protein 2 (BAIAP2), 3, mRNA.                                                    |
| SEN2      | 1.62 | 1.27 NM_021627.2    | Homo sapiens SUMO1/sentrin/SMT3 specific peptidase 2 (SEN2), mRNA.                                           |
| RAP2C     | 1.62 | 1.28 NM_021183.3    | Homo sapiens RAP2C, member of RAS oncogene family (RAP2C), mRNA.                                             |
| SEMA4G    | 1.62 | 1.36 NM_017893.2    | Homo sapiens sema domain, immunoglobulin domain (Ig), transmembrane domain (TM) and short cytoplasmic domain |
| PTPRU     | 1.62 | 1.37 NM_005704.3    | Homo sapiens protein tyrosine phosphatase, receptor type, U (PTPRU), 3, mRNA.                                |
| DOCK5     | 1.62 | 1.35 NM_024940.6    | Homo sapiens dedicator of cytokinesis 5 (DOCK5), mRNA.                                                       |
| MSI2      | 1.62 | 1.32 NM_138962.2    | Homo sapiens musashi homolog 2 (Drosophila) (MSI2), 1, mRNA.                                                 |
| FBLN1     | 1.62 | 1.21 NM_001996.2    | Homo sapiens fibulin 1 (FBLN1), C, mRNA.                                                                     |
| PIR       | 1.63 | 1.25 NM_001018109.1 | Homo sapiens pirin (iron-binding nuclear protein) (PIR), 2, mRNA.                                            |
| DC2       | 1.63 | 1.26 NM_021227.2    | Homo sapiens DC2 protein (DC2), mRNA.                                                                        |
| CANT1     | 1.63 | 1.26 NM_138793.2    | Homo sapiens calcium activated nucleotidase 1 (CANT1), mRNA.                                                 |
| NUPR1     | 1.63 | 1.33 NM_001042483.1 | Homo sapiens nuclear protein 1 (NUPR1), 1, mRNA.                                                             |
| CLDN14    | 1.63 | 1.3 NM_012130.2     | Homo sapiens claudin 14 (CLDN14), 2, mRNA.                                                                   |
| MAP1LC3B  | 1.63 | 1.3 NM_022818.3     | Homo sapiens microtubule-associated protein 1 light chain 3 beta (MAP1LC3B), mRNA.                           |
| PCNX      | 1.63 | 1.27 NM_014982.2    | Homo sapiens pecanex homolog (Drosophila) (PCNX), mRNA.                                                      |
| SC65      | 1.64 | 1.29 NM_006455.2    | Homo sapiens synaptonemal complex protein SC65 (SC65), mRNA.                                                 |
| ZNF419    | 1.64 | 1.36 NM_001098495.1 | Homo sapiens zinc finger protein 419 (ZNF419), 6, mRNA.                                                      |
| YIPF5     | 1.64 | 1.37 NM_030799.6    | Homo sapiens Yip1 domain family, member 5 (YIPF5), 2, mRNA.                                                  |
| HSPB3     | 1.64 | 1.37 NM_006308.1    | Homo sapiens heat shock 27kDa protein 3 (HSPB3), mRNA.                                                       |
| MAPK4     | 1.64 | 1.27 NM_002747.2    | Homo sapiens mitogen-activated protein kinase 4 (MAPK4), mRNA.                                               |
| SNHG11    | 1.64 | 1.36 NR_003239.1    | Homo sapiens small nucleolar RNA host gene (non-protein coding) 11 (SNHG11) on chromosome 20.                |
| C1orf108  | 1.64 | 1.26 NM_024595.1    | Homo sapiens chromosome 1 open reading frame 108 (C1orf108), mRNA.                                           |
| VWCE      | 1.64 | 1.37 NM_152718.2    | Homo sapiens von Willebrand factor C and EGF domains (VWCE), mRNA.                                           |
| C16orf68  | 1.64 | 1.32 NM_024109.2    | Homo sapiens chromosome 16 open reading frame 68 (C16orf68), mRNA.                                           |
| PPP2R1B   | 1.65 | 1.3 NM_181699.2     | Homo sapiens protein phosphatase 2 (formerly 2A), regulatory subunit A, beta isoform (PPP2R1B), 2, mRNA.     |
| MRPS6     | 1.65 | 1.19 NM_032476.2    | Homo sapiens mitochondrial ribosomal protein S6 (MRPS6), mRNA.                                               |
| C10orf33  | 1.65 | 1.38 NM_032709.1    | Homo sapiens chromosome 10 open reading frame 33 (C10orf33), mRNA.                                           |
| MGLL      | 1.65 | 1.34 NM_007283.5    | Homo sapiens monoglyceride lipase (MGLL), 1, mRNA.                                                           |
| RNF44     | 1.65 | 1.32 NM_014901.4    | Homo sapiens ring finger protein 44 (RNF44), mRNA.                                                           |
| CTDSP2    | 1.65 | 1.25 NM_005730.3    | Homo sapiens CTD (carboxy-terminal domain, RNA polymerase II, polypeptide A)                                 |
| FLJ43692  | 1.65 | 1.29 NM_001003702.1 | Homo sapiens ARHGEF5-like (FLJ43692), mRNA.                                                                  |
| ZXDB      | 1.65 | 1.31 NM_007157.3    | Homo sapiens zinc finger, X-linked, duplicated B (ZXDB), mRNA.                                               |



|          |      |                     |                                                                                            |
|----------|------|---------------------|--------------------------------------------------------------------------------------------|
| VAV3     | 1.66 | 1.28 NM_006113.4    | Homo sapiens vav 3 guanine nucleotide exchange factor (VAV3), 1, mRNA.                     |
| YTHDF1   | 1.66 | 1.26 NM_017798.2    | Homo sapiens YTH domain family, member 1 (YTHDF1), mRNA.                                   |
| BSDC1    | 1.66 | 1.33 NM_018045.5    | Homo sapiens BSD domain containing 1 (BSDC1), mRNA.                                        |
| FAM84B   | 1.66 | 1.26 NM_174911.3    | Homo sapiens family with sequence similarity 84, member B (FAM84B), mRNA.                  |
| RUSC2    | 1.66 | 1.36 NM_014806.1    | Homo sapiens RUN and SH3 domain containing 2 (RUSC2), mRNA.                                |
| GMIP     | 1.67 | 1.4 NM_016573.1     | Homo sapiens GEM interacting protein (GMIP), mRNA.                                         |
| WASF2    | 1.67 | 1.3 NM_006990.2     | Homo sapiens WAS protein family, member 2 (WASF2), mRNA.                                   |
| DAK      | 1.67 | 1.36 NM_015533.3    | Homo sapiens dihydroxyacetone kinase 2 homolog ( <i>S. cerevisiae</i> ) (DAK), mRNA.       |
| MRPS11   | 1.67 | 1.26 NM_176805.1    | Homo sapiens mitochondrial ribosomal protein S11 (MRPS11), 2, mRNA.                        |
| S100A13  | 1.67 | 1.25 NM_001024211.1 | Homo sapiens S100 calcium binding protein A13 (S100A13), 3, mRNA.                          |
|          | 1.67 | 1.36 BQ068637       | AGENCOURT_6795541 NIH_MGC_47 Homo sapiens cDNA clone IMAGE:5802062 5, mRNA sequence        |
| GIYD1    | 1.67 | 1.37 NM_001014999.1 | Homo sapiens GIY-YIG domain containing 1 (GIYD1), 1, mRNA.                                 |
| TCF7L2   | 1.67 | 1.36 NM_030756.2    | Homo sapiens transcription factor 7-like 2 (T-cell specific, HMG-box) (TCF7L2), mRNA.      |
| MURC     | 1.67 | 1.37 NM_001018116.1 | Homo sapiens muscle-restricted coiled-coil protein (MURC), mRNA.                           |
| DYNC1I2  | 1.68 | 1.27 NM_001378.1    | Homo sapiens dynein, cytoplasmic 1, intermediate chain 2 (DYNC1I2), mRNA.                  |
| SLC39A11 | 1.68 | 1.33 NM_139177.2    | Homo sapiens solute carrier family 39 (metal ion transporter), member 11 (SLC39A11), mRNA. |
| ITPR3    | 1.68 | 1.22 NM_002224.2    | Homo sapiens inositol 1,4,5-triphosphate receptor, type 3 (ITPR3), mRNA.                   |
| FZD7     | 1.68 | 1.39 NM_003507.1    | Homo sapiens frizzled homolog 7 ( <i>Drosophila</i> ) (FZD7), mRNA.                        |
| BRP44    | 1.68 | 1.23 NM_015415.2    | Homo sapiens brain protein 44 (BRP44), mRNA.                                               |
| BRI3     | 1.68 | 1.24 NM_015379.3    | Homo sapiens brain protein I3 (BRI3), mRNA.                                                |
| TERF2    | 1.69 | 1.31 NM_005652.2    | Homo sapiens telomeric repeat binding factor 2 (TERF2), mRNA.                              |
| CHMP2A   | 1.69 | 1.24 NM_014453.2    | Homo sapiens chromatin modifying protein 2A (CHMP2A), 1, mRNA.                             |
| RPL10L   | 1.69 | 1.36 NM_080746.2    | Homo sapiens ribosomal protein L10-like (RPL10L), mRNA.                                    |
| LDOC1    | 1.69 | 1.35 NM_012317.2    | Homo sapiens leucine zipper, down-regulated in cancer 1 (LDOC1), mRNA.                     |
| DUSP22   | 1.69 | 1.35 NM_020185.3    | Homo sapiens dual specificity phosphatase 22 (DUSP22), mRNA.                               |
| MAPKAP1  | 1.69 | 1.33 NM_001006618.1 | Homo sapiens mitogen-activated protein kinase associated protein 1 (MAPKAP1), 6, mRNA.     |
| C19orf12 | 1.69 | 1.3 NM_001031726.2  | Homo sapiens chromosome 19 open reading frame 12 (C19orf12), 1, mRNA.                      |
| SCFD1    | 1.7  | 1.27 NM_016106.2    | Homo sapiens sec1 family domain containing 1 (SCFD1), 1, mRNA.                             |
| TSPAN17  | 1.7  | 1.28 NM_012171.1    | Homo sapiens tetraspanin 17 (TSPAN17), 1, mRNA.                                            |
| SEC61G   | 1.7  | 1.18 NM_001012456.1 | Homo sapiens Sec61 gamma subunit (SEC61G), 2, mRNA.                                        |
| GOLGB1   | 1.7  | 1.31 NM_004487.3    | Homo sapiens golgin B1, golgi integral membrane protein (GOLGB1), mRNA.                    |
| CNN2     | 1.7  | 1.26 NM_201277.1    | Homo sapiens calponin 2 (CNN2), 2, mRNA.                                                   |
|          | 1.7  | 1.32 BX647520       | Homo sapiens mRNA; cDNA DKFZp686I05206 (from clone DKFZp686I05206)                         |
| FAM38A   | 1.7  | 1.22 NM_014745.1    | Homo sapiens family with sequence similarity 38, member A (FAM38A), mRNA.                  |
| KIAA0913 | 1.7  | 1.3 NM_015037.2     | Homo sapiens KIAA0913 (KIAA0913), mRNA.                                                    |
| CENTD2   | 1.71 | 1.38 NM_001040118.1 | Homo sapiens centaurin, delta 2 (CENTD2), 3, mRNA.                                         |
| LAMA1    | 1.71 | 1.19 NM_005559.2    | Homo sapiens laminin, alpha 1 (LAMA1), mRNA.                                               |
| FKBP1A   | 1.71 | 1.24 NM_000801.2    | Homo sapiens FK506 binding protein 1A, 12kDa (FKBP1A), 12B, mRNA.                          |
| LSS      | 1.71 | 1.28 NM_002340.3    | Homo sapiens lanosterol synthase (2,3-oxidosqualene-lanosterol cyclase) (LSS), 1, mRNA.    |
| ACACB    | 1.71 | 1.28 NM_001093.3    | Homo sapiens acetyl-Coenzyme A carboxylase beta (ACACB), mRNA.                             |
| DVL3     | 1.71 | 1.29 NM_004423.3    | Homo sapiens dishevelled, dsh homolog 3 ( <i>Drosophila</i> ) (DVL3), mRNA.                |
| PKP2     | 1.71 | 1.34 NM_001005242.1 | Homo sapiens plakophilin 2 (PKP2), 2a, mRNA.                                               |
| GGCX     | 1.71 | 1.33 NM_000821.3    | Homo sapiens gamma-glutamyl carboxylase (GGCX), mRNA.                                      |
| IGSF3    | 1.71 | 1.34 NM_001542.2    | Homo sapiens immunoglobulin superfamily, member 3 (IGSF3), 1, mRNA.                        |
| FTHL12   | 1.71 | 1.16 NR_002205.1    | Homo sapiens ferritin, heavy polypeptide-like 12 (FTHL12) on chromosome 9.                 |
| TUG1     | 1.71 | 1.24 NR_002323.1    | Homo sapiens taurine upregulated gene 1 (TUG1) on chromosome 22.                           |
| RABAC1   | 1.71 | 1.31 NM_006423.1    | Homo sapiens Rab acceptor 1 (prenylated) (RABAC1), mRNA.                                   |
| HOXA5    | 1.72 | 1.22 NM_019102.2    | Homo sapiens homeobox A5 (HOXA5), mRNA.                                                    |
| RNF217   | 1.72 | 1.38 NM_152553.2    | Homo sapiens ring finger protein 217 (RNF217), mRNA.                                       |

|          |      |                     |                                                                                                                     |
|----------|------|---------------------|---------------------------------------------------------------------------------------------------------------------|
| PBX1     | 1.72 | 1.34 NM_002585.1    | Homo sapiens pre-B-cell leukemia homeobox 1 (PBX1), mRNA.                                                           |
| GRN      | 1.72 | 1.25 NM_002087.2    | Homo sapiens granulin (GRN), mRNA.                                                                                  |
| APPL2    | 1.72 | 1.34 NM_018171.3    | Homo sapiens adaptor protein, phosphotyrosine interaction, PH domain and leucine zipper containing 2 (APPL2), mRNA. |
| TADA3L   | 1.73 | 1.35 NM_133480.1    | Homo sapiens transcriptional adaptor 3 (NGG1 homolog, yeast)-like (TADA3L), 2, mRNA.                                |
| HOXB7    | 1.73 | 1.29 NM_004502.3    | Homo sapiens homeobox B7 (HOXB7), mRNA.                                                                             |
| B3GAT3   | 1.73 | 1.39 NM_012200.2    | Homo sapiens beta-1,3-glucuronyltransferase 3 (glucuronosyltransferase I) (B3GAT3), mRNA.                           |
| NPAS2    | 1.73 | 1.39 NM_002518.3    | Homo sapiens neuronal PAS domain protein 2 (NPAS2), mRNA.                                                           |
| TMEM191B | 1.73 | 1.4 XM_001128423.1  | PREDICTED: Homo sapiens transmembrane protein 191B, 2 (TMEM191B), mRNA.                                             |
| CLDND1   | 1.73 | 1.31 NM_001040181.1 | Homo sapiens claudin domain containing 1 (CLDND1), 1, mRNA.                                                         |
| SLC38A10 | 1.73 | 1.31 NM_138570.2    | Homo sapiens solute carrier family 38, member 10 (SLC38A10), 2, mRNA.                                               |
| MAGEA3   | 1.73 | 1.29 NM_005362.3    | Homo sapiens melanoma antigen family A, 3 (MAGEA3), mRNA.                                                           |
| RALB     | 1.74 | 1.27 NM_002881.2    | Homo sapiens v-ral simian leukemia viral oncogene homolog B (ras related; GTP binding protein) (RALB), mRNA.        |
| TPD52L1  | 1.74 | 1.25 NM_001003397.1 | Homo sapiens tumor protein D52-like 1 (TPD52L1), 4, mRNA.                                                           |
| JARID2   | 1.74 | 1.3 NM_004973.2     | Homo sapiens jumonji, AT rich interactive domain 2 (JARID2), mRNA.                                                  |
| C7orf20  | 1.74 | 1.31 NM_015949.2    | Homo sapiens chromosome 7 open reading frame 20 (C7orf20), mRNA. XM_946081 XM_946082 XM_946083                      |
| TAF13    | 1.75 | 1.4 NM_005645.3     | Homo sapiens TAF13 RNA polymerase II, TATA box binding protein (TBP)-associated factor, 18kDa (TAF13), mRNA.        |
| MVP      | 1.75 | 1.31 NM_005115.3    | Homo sapiens major vault protein (MVP), 2, mRNA.                                                                    |
| BLOC1S2  | 1.75 | 1.4 NM_001001342.1  | Homo sapiens biogenesis of lysosome-related organelles complex-1, subunit 2 (BLOC1S2), 2, mRNA.                     |
| SNORA7B  | 1.75 | 1.35 NR_002992.2    | Homo sapiens small nucleolar RNA, H/ACA box 7B (SNORA7B) on chromosome 3.                                           |
| PEX19    | 1.76 | 1.31 NM_002857.2    | Homo sapiens peroxisomal biogenesis factor 19 (PEX19), mRNA.                                                        |
| ATP6V1G1 | 1.76 | 1.23 NM_004888.3    | Homo sapiens ATPase, H <sup>+</sup> transporting, lysosomal 13kDa, V1 subunit G1 (ATP6V1G1), mRNA.                  |
| PRKAB1   | 1.76 | 1.35 NM_006253.4    | Homo sapiens protein kinase, AMP-activated, beta 1 non-catalytic subunit (PRKAB1), mRNA.                            |
| BCKDHB   | 1.76 | 1.38 NM_000056.2    | Homo sapiens branched chain keto acid dehydrogenase E1, beta polypeptide                                            |
| ARPC4    | 1.76 | 1.26 NM_001024959.1 | Homo sapiens actin related protein 2/3 complex, subunit 4, 20kDa (ARPC4), 2, mRNA.                                  |
| IL11RA   | 1.76 | 1.35 NM_004512.3    | Homo sapiens interleukin 11 receptor, alpha (IL11RA), 1, mRNA.                                                      |
| FLJ20489 | 1.76 | 1.41 NM_017842.1    | Homo sapiens hypothetical protein FLJ20489 (FLJ20489), mRNA.                                                        |
| GTF2E1   | 1.76 | 1.32 NM_005513.1    | Homo sapiens general transcription factor IIE, polypeptide 1 (alpha subunit, 56kD) (GTF2E1), mRNA.                  |
| SLC44A3  | 1.76 | 1.41 NM_152369.2    | Homo sapiens solute carrier family 44, member 3 (SLC44A3), mRNA.                                                    |
| ATAD1    | 1.76 | 1.35 NM_032810.2    | Homo sapiens ATPase family, AAA domain containing 1 (ATAD1), mRNA.                                                  |
| CCDC22   | 1.76 | 1.41 NM_014008.2    | Homo sapiens coiled-coil domain containing 22 (CCDC22), mRNA.                                                       |
| SAV1     | 1.77 | 1.39 NM_021818.2    | Homo sapiens salvador homolog 1 (Drosophila) (SAV1), mRNA.                                                          |
| ARHGAP28 | 1.77 | 1.4 NM_001010000.1  | Homo sapiens Rho GTPase activating protein 28 (ARHGAP28), 1, mRNA.                                                  |
| SIL1     | 1.77 | 1.33 NM_001037633.1 | Homo sapiens SIL1 homolog, endoplasmic reticulum chaperone (S. cerevisiae) (SIL1), 1, mRNA.                         |
| GIYD2    | 1.77 | 1.4 NM_024044.2     | Homo sapiens GIY-YIG domain containing 2 (GIYD2), 1, mRNA.                                                          |
| DMAP1    | 1.77 | 1.28 NM_001034024.1 | Homo sapiens DNA methyltransferase 1 associated protein 1 (DMAP1), 3, mRNA.                                         |
| GRAMD4   | 1.77 | 1.37 NM_015124.2    | Homo sapiens GRAM domain containing 4 (GRAMD4), mRNA.                                                               |
| MTMR14   | 1.78 | 1.36 NM_022485.3    | Homo sapiens myotubularin related protein 14 (MTMR14), 3, mRNA.                                                     |
| CYB5R1   | 1.78 | 1.31 NM_016243.2    | Homo sapiens cytochrome b5 reductase 1 (CYB5R1), mRNA.                                                              |
| ITGAV    | 1.78 | 1.32 NM_002210.2    | Homo sapiens integrin, alpha V (vitronectin receptor, alpha polypeptide, antigen CD51) (ITGAV), mRNA.               |
| PLEKHA6  | 1.78 | 1.39 NM_014935.2    | Homo sapiens pleckstrin homology domain containing, family A member 6 (PLEKHA6), mRNA.                              |
| C1orf97  | 1.78 | 1.35 NM_032705.2    | Homo sapiens chromosome 1 open reading frame 97 (C1orf97), mRNA.                                                    |
| SUSD1    | 1.78 | 1.39 NM_022486.3    | Homo sapiens sushi domain containing 1 (SUSD1), mRNA.                                                               |
| BBS9     | 1.79 | 1.4 NM_001033604.1  | Homo sapiens Bardet-Biedl syndrome 9 (BBS9), 3, mRNA.                                                               |
| TRAM2    | 1.79 | 1.32 NM_012288.3    | Homo sapiens translocation associated membrane protein 2 (TRAM2), mRNA.                                             |
| FTH1     | 1.79 | 1.24 NM_002032.2    | Homo sapiens ferritin, heavy polypeptide 1 (FTH1), mRNA.                                                            |
| ECM2     | 1.79 | 1.38 NM_001393.2    | Homo sapiens extracellular matrix protein 2, female organ and adipocyte specific (ECM2), mRNA.                      |
| TRIAP1   | 1.79 | 1.3 NM_016399.2     | Homo sapiens TP53 regulated inhibitor of apoptosis 1 (TRIAP1), mRNA.                                                |
| CHMP6    | 1.79 | 1.37 XM_001132548.1 | PREDICTED: Homo sapiens chromatin modifying protein 6 (CHMP6), mRNA.                                                |
| RNF19B   | 1.79 | 1.38 NM_153341.1    | Homo sapiens ring finger protein 19B (RNF19B), mRNA.                                                                |

|           |      |                     |                                                                                                                 |
|-----------|------|---------------------|-----------------------------------------------------------------------------------------------------------------|
| APH1B     | 1.8  | 1.34 NM_031301.2    | Homo sapiens anterior pharynx defective 1 homolog B (C. elegans) (APH1B), mRNA.                                 |
| NDUFA13   | 1.8  | 1.26 NM_015965.4    | Homo sapiens NADH dehydrogenase (ubiquinone) 1 alpha subcomplex, 13 (NDUFA13), mRNA.                            |
| TBC1D10A  | 1.8  | 1.41 NM_031937.1    | Homo sapiens TBC1 domain family, member 10A (TBC1D10A), mRNA.                                                   |
| GSDML     | 1.8  | 1.4 NM_018530.2     | Homo sapiens gasdermin-like (GSDML), 2, mRNA.                                                                   |
| RFFL      | 1.81 | 1.39 NM_057178.3    | Homo sapiens ring finger and FYVE-like domain containing 1 (RFFL), 1, mRNA.                                     |
| TRAK1     | 1.81 | 1.35 NM_001042646.1 | Homo sapiens trafficking protein, kinesin binding 1 (TRAK1), 1, mRNA.                                           |
| PLK2      | 1.81 | 1.34 NM_006622.2    | Homo sapiens polo-like kinase 2 (Drosophila) (PLK2), mRNA.                                                      |
| CCNK      | 1.81 | 1.28 NM_003858.3    | Homo sapiens cyclin K (CCNK), 2, mRNA.                                                                          |
| CTNNBIP1  | 1.81 | 1.42 NM_020248.2    | Homo sapiens catenin, beta interacting protein 1 (CTNNBIP1), 1, mRNA.                                           |
| ARL16     | 1.81 | 1.34 NM_001040025.1 | Homo sapiens ADP-ribosylation factor-like 16 (ARL16), mRNA.                                                     |
| ASCC2     | 1.82 | 1.27 NM_032204.3    | Homo sapiens activating signal cointegrator 1 complex subunit 2 (ASCC2), mRNA.                                  |
| MCF2      | 1.82 | 1.42 NM_005369.3    | Homo sapiens MCF.2 cell line derived transforming sequence (MCF2), 2, mRNA.                                     |
| ZYX       | 1.82 | 1.26 NM_003461.4    | Homo sapiens zyxin (ZYX), 1, mRNA.                                                                              |
| GMPPA     | 1.82 | 1.33 NM_205847.1    | Homo sapiens GDP-mannose pyrophosphorylase A (GMPPA), 2, mRNA.                                                  |
| C9orf5    | 1.82 | 1.3 NM_032012.3     | Homo sapiens chromosome 9 open reading frame 5 (C9orf5), 1, mRNA.                                               |
| LOC730820 | 1.82 | 1.34 XM_001127763.1 | PREDICTED: Homo sapiens similar to nuclear receptor binding factor 2 (LOC730820), mRNA.                         |
| PXN       | 1.82 | 1.4 NM_002859.1     | Homo sapiens paxillin (PXN), mRNA.                                                                              |
| C21orf34  | 1.82 | 1.41 NM_001005734.1 | Homo sapiens chromosome 21 open reading frame 34 (C21orf34), 3, mRNA.                                           |
| ABCC2     | 1.83 | 1.29 NM_000392.1    | Homo sapiens ATP-binding cassette, sub-family C (CFTR/MRP), member 2 (ABCC2), mRNA.                             |
| MED16     | 1.83 | 1.35 NM_005481.2    | Homo sapiens mediator complex subunit 16 (MED16), mRNA.                                                         |
| C12orf59  | 1.83 | 1.4 NM_153022.1     | Homo sapiens chromosome 12 open reading frame 59 (C12orf59), mRNA.                                              |
| C7orf20   | 1.83 | 1.39 NM_015949.2    | Homo sapiens chromosome 7 open reading frame 20 (C7orf20), mRNA. XM_946081 XM_946082 XM_946083                  |
| CSAG3B    | 1.83 | 1.36 NM_001080848.1 | Homo sapiens CSAG family, member 3B (CSAG3B), mRNA.                                                             |
| SVOPL     | 1.84 | 1.43 NM_174959.1    | Homo sapiens SVOP-like (SVOPL), mRNA.                                                                           |
| NOV       | 1.84 | 1.39 NM_002514.2    | Homo sapiens nephroblastoma overexpressed gene (NOV), mRNA.                                                     |
| SDSL      | 1.84 | 1.42 NM_138432.2    | Homo sapiens serine dehydratase-like (SDSL), mRNA.                                                              |
| ATP6V0A4  | 1.84 | 1.38 NM_020632.2    | Homo sapiens ATPase, H <sup>+</sup> transporting, lysosomal V0 subunit a4 (ATP6V0A4), 1, mRNA.                  |
| PTPLA     | 1.84 | 1.28 NM_014241.3    | Homo sapiens protein tyrosine phosphatase-like (proline instead of catalytic arginine), member A (PTPLA), mRNA. |
| SULT1A3   | 1.84 | 1.37 NM_003166.3    | Homo sapiens sulfotransferase family, cytosolic, 1A, phenol-preferring, member 3 (SULT1A3), 1, mRNA.            |
| CAPG      | 1.84 | 1.37 NM_001747.2    | Homo sapiens capping protein (actin filament), gelsolin-like (CAPG), mRNA.                                      |
| SH3GLB1   | 1.84 | 1.25 NM_016009.2    | Homo sapiens SH3-domain GRB2-like endophilin B1 (SH3GLB1), mRNA.                                                |
| LAMP2     | 1.84 | 1.31 NM_002294.1    | Homo sapiens lysosomal-associated membrane protein 2 (LAMP2), LAMP2A, mRNA.                                     |
| SKAP2     | 1.85 | 1.36 NM_003930.3    | Homo sapiens src kinase associated phosphoprotein 2 (SKAP2), mRNA.                                              |
| MYH9      | 1.85 | 1.23 NM_002473.3    | Homo sapiens myosin, heavy chain 9, non-muscle (MYH9), mRNA.                                                    |
| PARP3     | 1.85 | 1.37 NM_001003931.1 | Homo sapiens poly (ADP-ribose) polymerase family, member 3 (PARP3), 1, mRNA.                                    |
| ISCU      | 1.85 | 1.34 NM_014301.2    | Homo sapiens iron-sulfur cluster scaffold homolog (E. coli) (ISCU), 1, mRNA.                                    |
| TPD52L1   | 1.85 | 1.29 NM_001003396.1 | Homo sapiens tumor protein D52-like 1 (TPD52L1), 3, mRNA.                                                       |
| SULT1A2   | 1.85 | 1.39 NM_001054.2    | Homo sapiens sulfotransferase family, cytosolic, 1A, phenol-preferring, member 2 (SULT1A2), 1, mRNA.            |
| RNF135    | 1.85 | 1.36 NM_197939.1    | Homo sapiens ring finger protein 135 (RNF135), 2, mRNA.                                                         |
| NHS       | 1.85 | 1.34 NM_198270.2    | Homo sapiens Nance-Horan syndrome (congenital cataracts and dental anomalies) (NHS), mRNA.                      |
| C10orf58  | 1.85 | 1.3 NM_032333.4     | Homo sapiens chromosome 10 open reading frame 58 (C10orf58), mRNA.                                              |
| TMEM120A  | 1.85 | 1.36 NM_031925.1    | Homo sapiens transmembrane protein 120A (TMEM120A), mRNA.                                                       |
| DNAJC1    | 1.86 | 1.43 NM_022365.3    | Homo sapiens DnaJ (Hsp40) homolog, subfamily C, member 1 (DNAJC1), mRNA.                                        |
| TOR1A     | 1.86 | 1.35 NM_000113.2    | Homo sapiens torsin family 1, member A (torsin A) (TOR1A), mRNA.                                                |
| ACOX1     | 1.86 | 1.37 NM_007292.4    | Homo sapiens acyl-Coenzyme A oxidase 1, palmitoyl (ACOX1), 2, mRNA.                                             |
| POMT1     | 1.86 | 1.43 NM_007171.3    | Homo sapiens protein-O-mannosyltransferase 1 (POMT1), 1, mRNA.                                                  |
| NICN1     | 1.86 | 1.36 NM_032316.3    | Homo sapiens nicolin 1 (NICN1), mRNA.                                                                           |
| ATXN10    | 1.86 | 1.41 NM_013236.2    | Homo sapiens ataxin 10 (ATXN10), mRNA.                                                                          |
| ZNF564    | 1.87 | 1.42 NM_144976.2    | Homo sapiens zinc finger protein 564 (ZNF564), mRNA.                                                            |

|           |      |                     |                                                                                                            |
|-----------|------|---------------------|------------------------------------------------------------------------------------------------------------|
| SRP14     | 1.87 | 1.21 NM_003134.2    | Homo sapiens signal recognition particle 14kDa (homologous Alu RNA binding protein) (SRP14), mRNA.         |
| TAGLN2    | 1.87 | 1.31 NM_003564.1    | Homo sapiens transgelin 2 (TAGLN2), mRNA.                                                                  |
| CLCN3     | 1.87 | 1.34 NM_173872.2    | Homo sapiens chloride channel 3 (CLCN3), e, mRNA.                                                          |
| CYP26B1   | 1.87 | 1.34 NM_019885.2    | Homo sapiens cytochrome P450, family 26, subfamily B, polypeptide 1 (CYP26B1), mRNA.                       |
| COL7A1    | 1.87 | 1.35 NM_000094.2    | Homo sapiens collagen, type VII, alpha 1 (epidermolysis bullosa, dystrophic) (COL7A1), mRNA.               |
| LOC729021 | 1.87 | 1.4 XR_015834.1     | PREDICTED: Homo sapiens hypothetical protein LOC729021 (LOC729021), mRNA.                                  |
| RBM38     | 1.87 | 1.37 NM_183425.1    | Homo sapiens RNA binding motif protein 38 (RBM38), 2, mRNA.                                                |
| IL20RB    | 1.87 | 1.43 NM_144717.2    | Homo sapiens interleukin 20 receptor beta (IL20RB), mRNA.                                                  |
| YRDC      | 1.87 | 1.3 NM_024640.3     | Homo sapiens yrdC domain containing (E. coli) (YRDC), mRNA.                                                |
| KIAA1600  | 1.87 | 1.35 NM_020940.2    | Homo sapiens KIAA1600 (KIAA1600), mRNA.                                                                    |
| TMEM188   | 1.87 | 1.35 NM_153261.4    | Homo sapiens transmembrane protein 188 (TMEM188), mRNA.                                                    |
| CCPG1     | 1.87 | 1.37 NM_020739.2    | Homo sapiens cell cycle progression 1 (CCPG1), 2, mRNA.                                                    |
| KLF6      | 1.88 | 1.38 NM_001008490.1 | Homo sapiens Kruppel-like factor 6 (KLF6), 1, mRNA.                                                        |
| DC2       | 1.88 | 1.25 NM_021227.2    | Homo sapiens DC2 protein (DC2), mRNA.                                                                      |
| TXNRD2    | 1.88 | 1.33 NM_006440.3    | Homo sapiens thioredoxin reductase 2 (TXNRD2), mRNA.                                                       |
| EFNA1     | 1.88 | 1.26 NM_004428.2    | Homo sapiens ephrin-A1 (EFNA1), 1, mRNA.                                                                   |
| MYO6      | 1.88 | 1.41 NM_004999.3    | Homo sapiens myosin VI (MYO6), mRNA.                                                                       |
| C19orf62  | 1.88 | 1.34 NM_014173.2    | Homo sapiens chromosome 19 open reading frame 62 (C19orf62), 2, mRNA.                                      |
| PWWP2     | 1.88 | 1.43 NM_138499.2    | Homo sapiens PWWP domain containing 2 (PWWP2), mRNA.                                                       |
| C20orf100 | 1.89 | 1.33 NM_032883.1    | Homo sapiens chromosome 20 open reading frame 100 (C20orf100), mRNA.                                       |
| MYL5      | 1.89 | 1.42 NM_002477.1    | Homo sapiens myosin, light chain 5, regulatory (MYL5), mRNA.                                               |
| AHCYL1    | 1.89 | 1.22 NM_006621.4    | Homo sapiens S-adenosylhomocysteine hydrolase-like 1 (AHCYL1), mRNA.                                       |
| ECEL1     | 1.89 | 1.28 NM_004826.1    | Homo sapiens endothelin converting enzyme-like 1 (ECEL1), mRNA.                                            |
| TMEM134   | 1.89 | 1.37 NM_001078651.1 | Homo sapiens transmembrane protein 134 (TMEM134), 3, mRNA.                                                 |
| LOC727825 | 1.89 | 1.43 XR_015127.1    | PREDICTED: Homo sapiens hypothetical protein LOC727825 (LOC727825), mRNA.                                  |
| DDAH1     | 1.9  | 1.3 NM_012137.2     | Homo sapiens dimethylarginine dimethylaminohydrolase 1 (DDAH1), mRNA.                                      |
| NFE2L1    | 1.9  | 1.34 NM_003204.1    | Homo sapiens nuclear factor (erythroid-derived 2)-like 1 (NFE2L1), mRNA.                                   |
| NAGLU     | 1.9  | 1.38 NM_000263.3    | Homo sapiens N-acetylglucosaminidase, alpha- (Sanfilippo disease IIIB) (NAGLU), mRNA.                      |
| CD99      | 1.9  | 1.36 NM_002414.3    | Homo sapiens CD99 molecule (CD99), 1, mRNA.                                                                |
| LRDD      | 1.9  | 1.42 NM_018494.3    | Homo sapiens leucine-rich repeats and death domain containing (LRDD), 2, mRNA.                             |
| PPCS      | 1.9  | 1.34 NM_001077447.1 | Homo sapiens phosphopantothenoylcysteine synthetase (PPCS), 2, mRNA.                                       |
| MAGEB2    | 1.9  | 1.3 NM_002364.3     | Homo sapiens melanoma antigen family B, 2 (MAGEB2), mRNA.                                                  |
| HECTD3    | 1.91 | 1.37 NM_024602.4    | Homo sapiens HECT domain containing 3 (HECTD3), mRNA.                                                      |
| ZNF211    | 1.91 | 1.43 NM_006385.2    | Homo sapiens zinc finger protein 211 (ZNF211), 1, mRNA.                                                    |
| RPUSD3    | 1.91 | 1.27 NM_173659.2    | Homo sapiens RNA pseudouridylate synthase domain containing 3 (RPUSD3), mRNA.                              |
| LMO4      | 1.91 | 1.29 NM_006769.2    | Homo sapiens LIM domain only 4 (LMO4), mRNA.                                                               |
| SLC24A6   | 1.91 | 1.36 NM_024959.2    | Homo sapiens solute carrier family 24 (sodium/potassium/calcium exchanger), member 6 (SLC24A6), mRNA.      |
| ATP6V0A4  | 1.91 | 1.42 NM_130840.2    | Homo sapiens ATPase, H <sup>+</sup> transporting, lysosomal V0 subunit a4 (ATP6V0A4), 2, mRNA.             |
| CACNB2    | 1.91 | 1.43 NM_201570.2    | Homo sapiens calcium channel, voltage-dependent, beta 2 subunit (CACNB2), 7, mRNA.                         |
| VRK3      | 1.91 | 1.42 NM_001025778.1 | Homo sapiens vaccinia related kinase 3 (VRK3), 2, mRNA.                                                    |
| DAB2      | 1.91 | 1.3 NM_001343.2     | Homo sapiens disabled homolog 2, mitogen-responsive phosphoprotein (Drosophila) (DAB2), mRNA.              |
| LOC646082 | 1.91 | 1.45 XM_929042.1    | PREDICTED: Homo sapiens similar to Cysteine-rich protein 1 (Cysteine-rich intestinal protein) (CRIP) mRNA. |
| C11orf17  | 1.91 | 1.3 NM_182901.2     | Homo sapiens chromosome 11 open reading frame 17 (C11orf17), 1, mRNA.                                      |
| SPPL2B    | 1.91 | 1.43 NM_001077238.1 | Homo sapiens signal peptide peptidase-like 2B (SPPL2B), 3, mRNA.                                           |
| SIL1      | 1.92 | 1.33 NM_001037633.1 | Homo sapiens SIL1 homolog, endoplasmic reticulum chaperone (S. cerevisiae) (SIL1), 1, mRNA.                |
| TRAF4     | 1.92 | 1.39 NM_004295.3    | Homo sapiens TNF receptor-associated factor 4 (TRAF4), mRNA.                                               |
| LPXN      | 1.92 | 1.43 NM_004811.1    | Homo sapiens leupaxin (LPXN), mRNA.                                                                        |
| AP2M1     | 1.93 | 1.28 NM_004068.3    | Homo sapiens adaptor-related protein complex 2, mu 1 subunit (AP2M1), 1, mRNA.                             |
| SNX2      | 1.93 | 1.3 NM_003100.2     | Homo sapiens sorting nexin 2 (SNX2), mRNA.                                                                 |

|           |      |                     |                                                                                                     |
|-----------|------|---------------------|-----------------------------------------------------------------------------------------------------|
| SERINC3   | 1.93 | 1.33 NM_006811.2    | Homo sapiens serine incorporator 3 (SERINC3), 1, mRNA.                                              |
| EIF2AK3   | 1.94 | 1.41 NM_004836.4    | Homo sapiens eukaryotic translation initiation factor 2-alpha kinase 3 (EIF2AK3), mRNA.             |
| SRP54     | 1.94 | 1.29 NM_003136.2    | Homo sapiens signal recognition particle 54kDa (SRP54), mRNA.                                       |
| IGSF3     | 1.94 | 1.33 NM_001542.2    | Homo sapiens immunoglobulin superfamily, member 3 (IGSF3), 1, mRNA.                                 |
| ZNF622    | 1.94 | 1.27 NM_033414.2    | Homo sapiens zinc finger protein 622 (ZNF622), mRNA.                                                |
| AMZ2      | 1.94 | 1.28 NM_001033569.1 | Homo sapiens archaelysin family metallopeptidase 2 (AMZ2), 2, mRNA.                                 |
|           | 1.94 | 1.43 BC040653       | Homo sapiens cDNA clone IMAGE:4797120                                                               |
| TMEM16K   | 1.94 | 1.41 NM_018075.3    | Homo sapiens transmembrane protein 16K (TMEM16K), mRNA.                                             |
| DUSP18    | 1.95 | 1.43 NM_152511.3    | Homo sapiens dual specificity phosphatase 18 (DUSP18), mRNA.                                        |
| ICAM2     | 1.95 | 1.45 NM_001099786.1 | Homo sapiens intercellular adhesion molecule 2 (ICAM2), 1, mRNA.                                    |
| ANXA2P1   | 1.95 | 1.34 NR_001562.1    | Homo sapiens annexin A2 pseudogene 1 (ANXA2P1) on chromosome 4.                                     |
| LOC90120  | 1.95 | 1.43 XM_931232.1    | PREDICTED: Homo sapiens hypothetical gene supported by AK023162, 4 (LOC90120), mRNA.                |
| NVL       | 1.95 | 1.32 NM_206840.1    | Homo sapiens nuclear VCP-like (NVL), 2, mRNA.                                                       |
| ASTN2     | 1.95 | 1.44 NM_198186.2    | Homo sapiens astrotactin 2 (ASTN2), 2, mRNA.                                                        |
| CSAG1     | 1.95 | 1.28 NM_153479.1    | Homo sapiens chondrosarcoma associated gene 1 (CSAG1), b, mRNA.                                     |
| PEX11G    | 1.95 | 1.46 NM_080662.2    | Homo sapiens peroxisomal biogenesis factor 11 gamma (PEX11G), mRNA.                                 |
| HSD17B7P2 | 1.95 | 1.43 NR_003086.1    | Homo sapiens hydroxysteroid (17-beta) dehydrogenase 7 pseudogene 2 (HSD17B7P2) on chromosome 10.    |
| TM9SF2    | 1.96 | 1.29 NM_004800.1    | Homo sapiens transmembrane 9 superfamily member 2 (TM9SF2), mRNA.                                   |
| DPH3      | 1.96 | 1.42 NM_001047434.1 | Homo sapiens DPH3, KTI11 homolog (S. cerevisiae) (DPH3), 2, mRNA.                                   |
| ALKBH6    | 1.96 | 1.36 NM_198867.1    | Homo sapiens alkB, alkylation repair homolog 6 (E. coli) (ALKBH6), 1, mRNA.                         |
| PLEKHM1   | 1.96 | 1.42 XM_001128220.1 | PREDICTED: Homo sapiens pleckstrin homology domain containing, family M (with RUN domain)           |
| SRGN      | 1.96 | 1.38 NM_002727.2    | Homo sapiens serglycin (SRGN), mRNA.                                                                |
| NTS       | 1.97 | 1.43 NM_006183.3    | Homo sapiens neurotensin (NTS), mRNA.                                                               |
| RCAN1     | 1.97 | 1.34 NM_203417.1    | Homo sapiens regulator of calcineurin 1 (RCAN1), 2, mRNA.                                           |
| ANTXR1    | 1.97 | 1.38 NM_053034.1    | Homo sapiens anthrax toxin receptor 1 (ANTXR1), 2, mRNA.                                            |
| MAL2      | 1.97 | 1.4 NM_052886.2     | Homo sapiens mal, T-cell differentiation protein 2 (MAL2), mRNA.                                    |
| DUSP22    | 1.97 | 1.32 XM_941691.1    | PREDICTED: Homo sapiens dual specificity phosphatase 22 (DUSP22), mRNA.                             |
| NAT1      | 1.97 | 1.43 XM_001127234.1 | PREDICTED: Homo sapiens N-acetyltransferase 1 (arylamine N-acetyltransferase) (NAT1), mRNA.         |
| PRSS23    | 1.97 | 1.34 NM_007173.4    | Homo sapiens protease, serine, 23 (PRSS23), mRNA.                                                   |
| HERC6     | 1.98 | 1.4 NM_017912.3     | Homo sapiens hect domain and RLD 6 (HERC6), mRNA.                                                   |
| B4GALT7   | 1.98 | 1.38 NM_007255.1    | Homo sapiens xylosylprotein beta 1,4-galactosyltransferase, polypeptide 7 (galactosyltransferase I) |
| TFG       | 1.98 | 1.25 NM_006070.4    | Homo sapiens TRK-fused gene (TFG), 1, mRNA.                                                         |
| BAX       | 1.98 | 1.46 NM_004324.3    | Homo sapiens BCL2-associated X protein (BAX), beta, mRNA.                                           |
| SQLE      | 1.98 | 1.3 NM_003129.3     | Homo sapiens squalene epoxidase (SQLE), mRNA.                                                       |
| S100A13   | 1.98 | 1.47 NM_001024210.1 | Homo sapiens S100 calcium binding protein A13 (S100A13), 1, mRNA.                                   |
| LIMCH1    | 1.98 | 1.3 NM_014988.1     | Homo sapiens LIM and calponin homology domains 1 (LIMCH1), mRNA.                                    |
| WFS1      | 1.99 | 1.36 NM_006005.2    | Homo sapiens Wolfram syndrome 1 (wolframin) (WFS1), mRNA.                                           |
| CD79B     | 1.99 | 1.46 NM_001039933.1 | Homo sapiens CD79b molecule, immunoglobulin-associated beta (CD79B), 3, mRNA.                       |
| TBC1D7    | 1.99 | 1.35 NM_016495.2    | Homo sapiens TBC1 domain family, member 7 (TBC1D7), mRNA.                                           |
| TMEM185A  | 1.99 | 1.44 NM_032508.1    | Homo sapiens transmembrane protein 185A (TMEM185A), mRNA.                                           |
| C1orf50   | 1.99 | 1.36 NM_024097.1    | Homo sapiens chromosome 1 open reading frame 50 (C1orf50), mRNA.                                    |
| PTPRJ     | 2    | 1.47 NM_002843.2    | Homo sapiens protein tyrosine phosphatase, receptor type, J (PTPRJ), mRNA.                          |
| ABTB1     | 2    | 1.44 NM_032548.2    | Homo sapiens ankyrin repeat and BTB (POZ) domain containing 1 (ABTB1), 1, mRNA.                     |
| FER1L3    | 2    | 1.29 NM_133337.1    | Homo sapiens fer-1-like 3, myoferlin (C. elegans) (FER1L3), 2, mRNA.                                |
| AP2A1     | 2    | 1.46 NM_130787.2    | Homo sapiens adaptor-related protein complex 2, alpha 1 subunit (AP2A1), 2, mRNA.                   |
| SURF1     | 2    | 1.37 NM_003172.2    | Homo sapiens surfait 1 (SURF1), mRNA.                                                               |
| TMLHE     | 2    | 1.43 XM_938703.1    | PREDICTED: Homo sapiens trimethyllysine hydroxylase, epsilon (TMLHE), mRNA.                         |
| DOK4      | 2    | 1.45 NM_018110.2    | Homo sapiens docking protein 4 (DOK4), mRNA.                                                        |
| ARHGEF18  | 2.01 | 1.31 NM_015318.2    | Homo sapiens rho/rac guanine nucleotide exchange factor (GEF) 18 (ARHGEF18), mRNA.                  |

|           |      |                     |                                                                                                                   |
|-----------|------|---------------------|-------------------------------------------------------------------------------------------------------------------|
| LEPREL1   | 2.01 | 1.28 NM_018192.2    | Homo sapiens leprecan-like 1 (LEPREL1), mRNA.                                                                     |
| PC        | 2.01 | 1.34 NM_000920.2    | Homo sapiens pyruvate carboxylase (PC), A, mRNA.                                                                  |
| PVRL2     | 2.01 | 1.47 NM_001042724.1 | Homo sapiens poliovirus receptor-related 2 (herpesvirus entry mediator B) (PVRL2), delta, mRNA.                   |
| SIDT2     | 2.01 | 1.4 NM_001040455.1  | Homo sapiens SID1 transmembrane family, member 2 (SIDT2), mRNA.                                                   |
| ZDHHC5    | 2.01 | 1.36 NM_015457.2    | Homo sapiens zinc finger, DHHC-type containing 5 (ZDHHC5), mRNA.                                                  |
| KIAA1949  | 2.01 | 1.36 NM_133471.1    | Homo sapiens KIAA1949 (KIAA1949), mRNA.                                                                           |
| HSD17B12  | 2.02 | 1.39 NM_016142.2    | Homo sapiens hydroxysteroid (17-beta) dehydrogenase 12 (HSD17B12), mRNA.                                          |
| ALAS1     | 2.02 | 1.43 NM_000688.4    | Homo sapiens aminolevulinic acid, delta-, synthase 1 (ALAS1), 1, mRNA.                                            |
| LOC401357 | 2.02 | 1.41 NM_001013685.1 | Homo sapiens hypothetical LOC401357 (LOC401357), mRNA.                                                            |
| CSAG3B    | 2.02 | 1.38 NM_001080848.1 | Homo sapiens CSAG family, member 3B (CSAG3B), mRNA.                                                               |
| TSPAN9    | 2.02 | 1.36 NM_006675.3    | Homo sapiens tetraspanin 9 (TSPAN9), mRNA.                                                                        |
| CCM2      | 2.03 | 1.36 NM_001029835.1 | Homo sapiens cerebral cavernous malformation 2 (CCM2), 1, mRNA.                                                   |
| RBPMS     | 2.03 | 1.43 NM_001008712.1 | Homo sapiens RNA binding protein with multiple splicing (RBPMS), 3, mRNA.                                         |
| TAF7      | 2.03 | 1.37 NM_005642.2    | Homo sapiens TAF7 RNA polymerase II, TATA box binding protein (TBP)-associated factor, 55kDa (TAF7), mRNA.        |
| CARD14    | 2.03 | 1.47 NM_024110.2    | Homo sapiens caspase recruitment domain family, member 14 (CARD14), 1, mRNA.                                      |
| CHMP2A    | 2.03 | 1.4 NM_198426.1     | Homo sapiens chromatin modifying protein 2A (CHMP2A), 2, mRNA.                                                    |
| PINK1     | 2.03 | 1.37 NM_032409.2    | Homo sapiens PTEN induced putative kinase 1 (PINK1), mRNA.                                                        |
| PTPRM     | 2.03 | 1.37 NM_002845.2    | Homo sapiens protein tyrosine phosphatase, receptor type, M (PTPRM), mRNA.                                        |
| DGKQ      | 2.03 | 1.43 NM_001347.2    | Homo sapiens diacylglycerol kinase, theta 110kDa (DGKQ), mRNA.                                                    |
| GSK3B     | 2.03 | 1.34 NM_002093.2    | Homo sapiens glycogen synthase kinase 3 beta (GSK3B), mRNA.                                                       |
| SRP14P1   | 2.03 | 1.28 NR_003273.1    | Homo sapiens signal recognition particle 14kDa (homologous Alu RNA binding protein) pseudogene 1 (SRP14P1)        |
| GIYD1     | 2.03 | 1.4 NM_001014999.1  | Homo sapiens GIY-YIG domain containing 1 (GIYD1), 1, mRNA.                                                        |
| PCTP      | 2.04 | 1.45 NM_021213.1    | Homo sapiens phosphatidylcholine transfer protein (PCTP), mRNA.                                                   |
| GIPC1     | 2.04 | 1.3 NM_202468.1     | Homo sapiens GIPC PDZ domain containing family, member 1 (GIPC1), 3, mRNA.                                        |
| APP       | 2.04 | 1.35 NM_201414.1    | Homo sapiens amyloid beta (A4) precursor protein (peptidase nexin-II, Alzheimer disease) (APP), 3, mRNA.          |
| FGF11     | 2.04 | 1.47 NM_004112.2    | Homo sapiens fibroblast growth factor 11 (FGF11), mRNA.                                                           |
| CD97      | 2.04 | 1.32 NM_078481.2    | Homo sapiens CD97 molecule (CD97), 1, mRNA.                                                                       |
| TMEM140   | 2.04 | 1.48 NM_018295.2    | Homo sapiens transmembrane protein 140 (TMEM140), mRNA.                                                           |
| SH3BGRL3  | 2.04 | 1.39 NM_031286.3    | Homo sapiens SH3 domain binding glutamic acid-rich protein like 3 (SH3BGRL3), mRNA.                               |
| OTUD1     | 2.04 | 1.47 XM_939698.1    | PREDICTED: Homo sapiens OTU domain containing 1 (OTUD1), mRNA.                                                    |
| YIPF1     | 2.04 | 1.35 NM_018982.3    | Homo sapiens Yip1 domain family, member 1 (YIPF1), mRNA.                                                          |
| EXT2      | 2.05 | 1.38 NM_000401.2    | Homo sapiens exostosin 2 (EXT2), 1, mRNA.                                                                         |
| ITGB2     | 2.05 | 1.48 NM_000211.2    | Homo sapiens integrin, beta 2 (complement component 3 receptor 3 and 4 subunit) (ITGB2), mRNA.                    |
| AHNAK     | 2.05 | 1.3 NM_001620.1     | Homo sapiens AHNAK nucleoprotein (AHNAK), 1, mRNA.                                                                |
| GHDC      | 2.05 | 1.43 NM_032484.3    | Homo sapiens GH3 domain containing (GHDC), mRNA.                                                                  |
| GAS6      | 2.06 | 1.48 NM_000820.1    | Homo sapiens growth arrest-specific 6 (GAS6), mRNA.                                                               |
| CEACAM1   | 2.06 | 1.45 NM_001024912.1 | Homo sapiens carcinoembryonic antigen-related cell adhesion molecule 1 (biliary glycoprotein) (CEACAM1), 2, mRNA. |
| C1orf85   | 2.06 | 1.33 NM_144580.1    | Homo sapiens chromosome 1 open reading frame 85 (C1orf85), mRNA.                                                  |
| RFNG      | 2.06 | 1.36 XM_001132711.1 | PREDICTED: Homo sapiens radical fringe homolog (Drosophila) (RFNG), mRNA.                                         |
| PHTF1     | 2.07 | 1.38 NM_006608.1    | Homo sapiens putative homeodomain transcription factor 1 (PHTF1), mRNA.                                           |
| DAB2IP    | 2.07 | 1.48 NM_032552.2    | Homo sapiens DAB2 interacting protein (DAB2IP), 1, mRNA.                                                          |
| TRIB1     | 2.07 | 1.33 NM_025195.2    | Homo sapiens tribbles homolog 1 (Drosophila) (TRIB1), mRNA.                                                       |
| CACNB2    | 2.07 | 1.48 NM_201597.2    | Homo sapiens calcium channel, voltage-dependent, beta 2 subunit (CACNB2), 4, mRNA.                                |
| PIK3C2B   | 2.07 | 1.36 NM_002646.2    | Homo sapiens phosphoinositide-3-kinase, class 2, beta polypeptide (PIK3C2B), mRNA.                                |
| HMGCS1    | 2.07 | 1.34 NM_002130.6    | Homo sapiens 3-hydroxy-3-methylglutaryl-Coenzyme A synthase 1 (soluble) (HMGCS1), 2, mRNA.                        |
| MAP4K4    | 2.08 | 1.42 NM_145687.2    | Homo sapiens mitogen-activated protein kinase kinase kinase kinase 4 (MAP4K4), 3, mRNA.                           |
| SECISBP2  | 2.08 | 1.42 NM_024077.3    | Homo sapiens SECIS binding protein 2 (SECISBP2), mRNA.                                                            |
| TRAK2     | 2.08 | 1.42 NM_015049.1    | Homo sapiens trafficking protein, kinesin binding 2 (TRAK2), mRNA.                                                |
| FURIN     | 2.08 | 1.41 NM_002569.2    | Homo sapiens furin (paired basic amino acid cleaving enzyme) (FURIN), mRNA.                                       |

|          |      |                     |                                                                                                                       |
|----------|------|---------------------|-----------------------------------------------------------------------------------------------------------------------|
| SPOCK1   | 2.08 | 1.36 NM_004598.3    | Homo sapiens spar/osteonectin, cwcv and kazal-like domains proteoglycan (testican) 1 (SPOCK1), mRNA.                  |
| TMEM134  | 2.08 | 1.4 NM_001078650.1  | Homo sapiens transmembrane protein 134 (TMEM134), 2, mRNA.                                                            |
| APBB3    | 2.08 | 1.46 NM_133173.2    | Homo sapiens amyloid beta (A4) precursor protein-binding, family B, member 3 (APBB3), 2, mRNA.                        |
| SDCBP    | 2.09 | 1.34 NM_001007067.1 | Homo sapiens syndecan binding protein (syntenin) (SDCBP), 2, mRNA.                                                    |
| ITPK1    | 2.09 | 1.4 NM_014216.3     | Homo sapiens inositol 1,3,4-triphosphate 5/6 kinase (ITPK1), mRNA.                                                    |
| DYNLRB1  | 2.09 | 1.33 NM_014183.2    | Homo sapiens dynein, light chain, roadblock-type 1 (DYNLRB1), mRNA.                                                   |
| DAP      | 2.09 | 1.37 NM_004394.1    | Homo sapiens death-associated protein (DAP), mRNA.                                                                    |
| SLC38A7  | 2.09 | 1.47 NM_018231.1    | Homo sapiens solute carrier family 38, member 7 (SLC38A7), mRNA.                                                      |
| C22orf29 | 2.09 | 1.41 NM_024627.5    | Homo sapiens chromosome 22 open reading frame 29 (C22orf29), mRNA.                                                    |
| CDK5     | 2.1  | 1.39 NM_004935.2    | Homo sapiens cyclin-dependent kinase 5 (CDK5), mRNA.                                                                  |
| ALDOA    | 2.1  | 1.26 NM_184043.1    | Homo sapiens aldolase A, fructose-bisphosphate (ALDOA), 3, mRNA.                                                      |
| MOV10    | 2.1  | 1.38 NM_020963.2    | Homo sapiens Mov10, Moloney leukemia virus 10, homolog (mouse) (MOV10), mRNA.                                         |
| ANXA2P1  | 2.1  | 1.31 NR_001562.1    | Homo sapiens annexin A2 pseudogene 1 (ANXA2P1) on chromosome 4.                                                       |
| ITPKB    | 2.11 | 1.48 NM_002221.2    | Homo sapiens inositol 1,4,5-trisphosphate 3-kinase B (ITPKB), mRNA.                                                   |
| UBTD1    | 2.11 | 1.41 NM_024954.3    | Homo sapiens ubiquitin domain containing 1 (UBTD1), mRNA.                                                             |
| AGPAT1   | 2.11 | 1.4 NM_006411.2     | Homo sapiens 1-acylglycerol-3-phosphate O-acyltransferase 1 (lysophosphatidic acid acyltransferase, alpha)            |
| TIMP4    | 2.11 | 1.48 NM_003256.2    | Homo sapiens TIMP metalloproteinase inhibitor 4 (TIMP4), mRNA.                                                        |
| MLLT11   | 2.11 | 1.49 NM_006818.3    | Homo sapiens myeloid/lymphoid or mixed-lineage leukemia (trithorax homolog, Drosophila); translocated to, 11 (MLLT11) |
| EDG4     | 2.11 | 1.46 NM_004720.4    | Homo sapiens endothelial differentiation, lysophosphatidic acid G-protein-coupled receptor, 4 (EDG4), mRNA.           |
| ALG9     | 2.11 | 1.29 NM_001077692.1 | Homo sapiens asparagine-linked glycosylation 9 homolog (S. cerevisiae, alpha-1,2-mannosyltransferase)                 |
| GPC1     | 2.11 | 1.46 NM_002081.1    | Homo sapiens glypican 1 (GPC1), mRNA.                                                                                 |
| C6orf85  | 2.12 | 1.47 NM_021945.4    | Homo sapiens chromosome 6 open reading frame 85 (C6orf85), mRNA.                                                      |
| RAB31    | 2.12 | 1.34 NM_006868.2    | Homo sapiens RAB31, member RAS oncogene family (RAB31), mRNA.                                                         |
| PDLIM7   | 2.12 | 1.49 NM_005451.3    | Homo sapiens PDZ and LIM domain 7 (enigma) (PDLIM7), 1, mRNA.                                                         |
| ABHD4    | 2.12 | 1.47 NM_022060.2    | Homo sapiens abhydrolase domain containing 4 (ABHD4), mRNA.                                                           |
| MOSC1    | 2.12 | 1.3 NM_022746.2     | Homo sapiens MOCO sulphurase C-terminal domain containing 1 (MOSC1), mRNA.                                            |
| LAMP2    | 2.12 | 1.39 NM_013995.1    | Homo sapiens lysosomal-associated membrane protein 2 (LAMP2), LAMP2B, mRNA.                                           |
| RRM2B    | 2.13 | 1.46 NM_015713.3    | Homo sapiens ribonucleotide reductase M2 B (TP53 inducible) (RRM2B), mRNA.                                            |
| DMAP1    | 2.13 | 1.34 NM_001034023.1 | Homo sapiens DNA methyltransferase 1 associated protein 1 (DMAP1), 2, mRNA.                                           |
| C16orf79 | 2.13 | 1.45 NM_182563.2    | Homo sapiens chromosome 16 open reading frame 79 (C16orf79), mRNA.                                                    |
| CCDC50   | 2.13 | 1.34 NM_174908.2    | Homo sapiens coiled-coil domain containing 50 (CCDC50), 1, mRNA.                                                      |
| SLC45A4  | 2.13 | 1.41 NM_001080431.1 | Homo sapiens solute carrier family 45, member 4 (SLC45A4), mRNA.                                                      |
| SLC6A10P | 2.13 | 1.49 NR_003083.2    | Homo sapiens solute carrier family 6 (neurotransmitter transporter, creatine), member 10 (pseudogene)                 |
| ABCD1    | 2.14 | 1.4 NM_000033.2     | Homo sapiens ATP-binding cassette, sub-family D (ALD), member 1 (ABCD1), mRNA.                                        |
| CCDC90B  | 2.14 | 1.35 NM_021825.3    | Homo sapiens coiled-coil domain containing 90B (CCDC90B), mRNA.                                                       |
| SMOC1    | 2.14 | 1.43 NM_001034852.1 | Homo sapiens SPARC related modular calcium binding 1 (SMOC1), 1, mRNA.                                                |
| GPER     | 2.15 | 1.39 NM_001039966.1 | Homo sapiens G protein-coupled estrogen receptor 1 (GPER), 3, mRNA.                                                   |
| LMNA     | 2.15 | 1.35 NM_005572.3    | Homo sapiens lamin A/C (LMNA), 2, mRNA.                                                                               |
| TMEM150  | 2.15 | 1.43 NM_001031738.1 | Homo sapiens transmembrane protein 150 (TMEM150), 1, mRNA.                                                            |
| FUCA1    | 2.16 | 1.44 NM_000147.3    | Homo sapiens fucosidase, alpha-L-1, tissue (FUCA1), mRNA.                                                             |
| SPRY2    | 2.16 | 1.43 NM_005842.2    | Homo sapiens sprouty homolog 2 (Drosophila) (SPRY2), mRNA.                                                            |
| WIPI1    | 2.16 | 1.45 NM_017983.4    | Homo sapiens WD repeat domain, phosphoinositide interacting 1 (WIPI1), mRNA.                                          |
| DIRC2    | 2.16 | 1.38 NM_032839.1    | Homo sapiens disrupted in renal carcinoma 2 (DIRC2), mRNA.                                                            |
| SEN2     | 2.17 | 1.4 NM_021627.2     | Homo sapiens SUMO1/sentrin/SMT3 specific peptidase 2 (SEN2), mRNA.                                                    |
| ETV5     | 2.17 | 1.36 NM_004454.1    | Homo sapiens ets variant gene 5 (ets-related molecule) (ETV5), mRNA.                                                  |
| CMAS     | 2.17 | 1.36 NM_018686.3    | Homo sapiens cytidine monophosphate N-acetylneuraminic acid synthetase (CMAS), mRNA.                                  |
| HS1BP3   | 2.17 | 1.44 NM_022460.3    | Homo sapiens HCLS1 binding protein 3 (HS1BP3), mRNA.                                                                  |
| ATP1A1   | 2.17 | 1.28 NM_001001586.1 | Homo sapiens ATPase, Na <sup>+</sup> /K <sup>+</sup> transporting, alpha 1 polypeptide (ATP1A1), 2, mRNA.             |
| ATPBD1B  | 2.17 | 1.41 NM_018066.3    | Homo sapiens ATP binding domain 1 family, member B (ATPBD1B), mRNA.                                                   |

|           |      |                     |                                                                                                                          |
|-----------|------|---------------------|--------------------------------------------------------------------------------------------------------------------------|
| YIPF1     | 2.17 | 1.4 NM_018982.3     | Homo sapiens Yip1 domain family, member 1 (YIPF1), mRNA.                                                                 |
| HHLA3     | 2.17 | 1.42 NM_001031693.2 | Homo sapiens HERV-H LTR-associating 3 (HHLA3), 1, mRNA.                                                                  |
| RAPSN     | 2.18 | 1.51 NM_005055.3    | Homo sapiens receptor-associated protein of the synapse (RAPSN), 1, mRNA.                                                |
| WSB1      | 2.18 | 1.45 NM_134265.2    | Homo sapiens WD repeat and SOCS box-containing 1 (WSB1), 2, mRNA.                                                        |
| NDUFB7    | 2.18 | 1.31 NM_004146.4    | Homo sapiens NADH dehydrogenase (ubiquinone) 1 beta subcomplex, 7, 18kDa (NDUFB7), mRNA.                                 |
| PTTG1IP   | 2.18 | 1.32 NM_004339.2    | Homo sapiens pituitary tumor-transforming 1 interacting protein (PTTG1IP), mRNA.                                         |
| LYPLAL1   | 2.18 | 1.39 NM_138794.2    | Homo sapiens lysophospholipase-like 1 (LYPLAL1), mRNA.                                                                   |
| GOLGA3    | 2.18 | 1.36 NM_005895.3    | Homo sapiens golgi autoantigen, golgin subfamily a, 3 (GOLGA3), mRNA.                                                    |
| TRIM29    | 2.19 | 1.45 NM_012101.3    | Homo sapiens tripartite motif-containing 29 (TRIM29), mRNA.                                                              |
| FUT4      | 2.19 | 1.5 NM_002033.2     | Homo sapiens fucosyltransferase 4 (alpha (1,3) fucosyltransferase, myeloid-specific) (FUT4), mRNA.                       |
| ST6GAL1   | 2.19 | 1.41 NM_003032.2    | Homo sapiens ST6 beta-galactosamide alpha-2,6-sialyltransferase 1 (ST6GAL1), 2, mRNA.                                    |
| TSPAN14   | 2.19 | 1.49 NM_030927.1    | Homo sapiens tetraspanin 14 (TSPAN14), mRNA.                                                                             |
| SNORD68   | 2.19 | 1.43 NR_002450.1    | Homo sapiens small nucleolar RNA, C/D box 68 (SNORD68) on chromosome 16.                                                 |
| VPS33A    | 2.2  | 1.43 NM_022916.4    | Homo sapiens vacuolar protein sorting 33 homolog A (S. cerevisiae) (VPS33A), mRNA.                                       |
| JUND      | 2.2  | 1.29 NM_005354.3    | Homo sapiens jun D proto-oncogene (JUND), mRNA.                                                                          |
| RBM38     | 2.2  | 1.48 NM_017495.4    | Homo sapiens RNA binding motif protein 38 (RBM38), 1, mRNA.                                                              |
| PRDX5     | 2.21 | 1.32 NM_012094.3    | Homo sapiens peroxiredoxin 5 (PRDX5), 1, mRNA.                                                                           |
| WSB1      | 2.21 | 1.44 NM_134265.2    | Homo sapiens WD repeat and SOCS box-containing 1 (WSB1), 2, mRNA.                                                        |
| SESN3     | 2.21 | 1.51 NM_144665.2    | Homo sapiens sestrin 3 (SESN3), mRNA.                                                                                    |
| LOC650826 | 2.22 | 1.51 XM_945912.2    | PREDICTED: Homo sapiens similar to CG9804-PA, 2 (LOC650826), mRNA.                                                       |
| CHPF      | 2.22 | 1.44 NM_024536.4    | Homo sapiens chondroitin polymerizing factor (CHPF), mRNA.                                                               |
| LOC285908 | 2.22 | 1.52 NM_181722.2    | Homo sapiens hypothetical protein LOC285908 (LOC285908), mRNA.                                                           |
| MSX1      | 2.23 | 1.37 NM_002448.3    | Homo sapiens msh homeobox 1 (MSX1), mRNA.                                                                                |
| NET1      | 2.23 | 1.39 NM_001047160.1 | Homo sapiens neuroepithelial cell transforming gene 1 (NET1), 1, mRNA.                                                   |
| WISP2     | 2.23 | 1.38 NM_003881.2    | Homo sapiens WNT1 inducible signaling pathway protein 2 (WISP2), mRNA.                                                   |
| FLJ13236  | 2.23 | 1.49 NM_024902.2    | Homo sapiens hypothetical protein FLJ13236 (FLJ13236), mRNA.                                                             |
| TSPAN6    | 2.23 | 1.4 NM_003270.2     | Homo sapiens tetraspanin 6 (TSPAN6), mRNA.                                                                               |
| NCSTN     | 2.23 | 1.35 NM_015331.2    | Homo sapiens nicastrin (NCSTN), mRNA.                                                                                    |
| ISCU      | 2.23 | 1.35 NM_213595.1    | Homo sapiens iron-sulfur cluster scaffold homolog (E. coli) (ISCU), 2, mRNA.                                             |
| ATP5S     | 2.23 | 1.48 NM_001003803.1 | Homo sapiens ATP synthase, H <sup>+</sup> transporting, mitochondrial F0 complex, subunit s (factor B) (ATP5S), 1, mRNA. |
| AP3S1     | 2.23 | 1.4 NM_001002924.1  | Homo sapiens adaptor-related protein complex 3, sigma 1 subunit (AP3S1), 2, mRNA.                                        |
| ITM2B     | 2.23 | 1.34 NM_021999.2    | Homo sapiens integral membrane protein 2B (ITM2B), mRNA.                                                                 |
| LOC92270  | 2.24 | 1.53 NM_001017971.1 | Homo sapiens hypothetical protein LOC92270 (LOC92270), mRNA.                                                             |
| C7orf53   | 2.24 | 1.52 NM_182597.1    | Homo sapiens chromosome 7 open reading frame 53 (C7orf53), mRNA.                                                         |
| DCUN1D3   | 2.24 | 1.47 NM_173475.1    | Homo sapiens DCN1, defective in cullin neddylation 1, domain containing 3 (S. cerevisiae) (DCUN1D3), mRNA.               |
| SLC25A16  | 2.25 | 1.53 NM_152707.2    | Homo sapiens solute carrier family 25 (mitochondrial carrier; Graves disease autoantigen), member 16 (SLC25A16)          |
| ZNFx1     | 2.25 | 1.41 NM_021035.2    | Homo sapiens zinc finger, NFX1-type containing 1 (ZNFx1), mRNA.                                                          |
| LOC644863 | 2.25 | 1.3 XM_927955.1     | PREDICTED: Homo sapiens similar to signal recognition particle 14kDa (homologous Alu RNA binding protein) mRNA.          |
| CHMP1B    | 2.26 | 1.38 NM_020412.3    | Homo sapiens chromatin modifying protein 1B (CHMP1B), mRNA.                                                              |
| XPC       | 2.26 | 1.4 NM_004628.3     | Homo sapiens xeroderma pigmentosum, complementation group C (XPC), mRNA.                                                 |
| FAT       | 2.26 | 1.42 NM_005245.3    | Homo sapiens FAT tumor suppressor homolog 1 (Drosophila) (FAT), mRNA.                                                    |
| IFIT3     | 2.26 | 1.58 NM_001031683.1 | Homo sapiens interferon-induced protein with tetratricopeptide repeats 3 (IFIT3), mRNA.                                  |
| WDR37     | 2.26 | 1.44 NM_014023.3    | Homo sapiens WD repeat domain 37 (WDR37), mRNA.                                                                          |
| NIBP      | 2.26 | 1.5 NM_031466.4     | Homo sapiens NIK and IKK{beta} binding protein (NIBP), mRNA.                                                             |
| SCAND1    | 2.27 | 1.4 NM_016558.2     | Homo sapiens SCAN domain containing 1 (SCAND1), 1, mRNA.                                                                 |
| FBXW7     | 2.27 | 1.49 NM_033632.2    | Homo sapiens F-box and WD repeat domain containing 7 (FBXW7), 1, mRNA.                                                   |
| CLN3      | 2.27 | 1.45 NM_001042432.1 | Homo sapiens ceroid-lipofuscinosis, neuronal 3, juvenile (Batten, Spielmeier-Vogt disease) (CLN3), 1, mRNA.              |
| P2RX4     | 2.27 | 1.51 NM_002560.2    | Homo sapiens purinergic receptor P2X, ligand-gated ion channel, 4 (P2RX4), mRNA.                                         |
| CD68      | 2.27 | 1.44 NM_001251.1    | Homo sapiens CD68 antigen (CD68), mRNA.                                                                                  |



|          |      |                     |                                                                                                                |
|----------|------|---------------------|----------------------------------------------------------------------------------------------------------------|
| TMEM189  | 2.27 | 1.4 NM_199129.1     | Homo sapiens transmembrane protein 189 (TMEM189), mRNA.                                                        |
| ANKRD33  | 2.27 | 1.46 NM_182608.2    | Homo sapiens ankyrin repeat domain 33 (ANKRD33), mRNA.                                                         |
| DFNA5    | 2.27 | 1.39 NM_004403.2    | Homo sapiens deafness, autosomal dominant 5 (DFNA5), mRNA.                                                     |
| TMEM191B | 2.27 | 1.52 XM_001128423.1 | PREDICTED: Homo sapiens transmembrane protein 191B, 2 (TMEM191B), mRNA.                                        |
| SEPX1    | 2.28 | 1.39 NM_016332.2    | Homo sapiens selenoprotein X, 1 (SEPX1), mRNA.                                                                 |
| AP2M1    | 2.28 | 1.37 NM_004068.3    | Homo sapiens adaptor-related protein complex 2, mu 1 subunit (AP2M1), 1, mRNA.                                 |
| TGFBR3   | 2.28 | 1.4 NM_003243.2     | Homo sapiens transforming growth factor, beta receptor III (TGFBR3), mRNA.                                     |
| SULT1A3  | 2.28 | 1.47 NM_003166.3    | Homo sapiens sulfotransferase family, cytosolic, 1A, phenol-preferring, member 3 (SULT1A3), 1, mRNA.           |
| RHOF     | 2.28 | 1.5 NM_019034.2     | Homo sapiens ras homolog gene family, member F (in filopodia) (RHOF), mRNA.                                    |
| HIST1H4H | 2.28 | 1.52 NM_003543.3    | Homo sapiens histone cluster 1, H4h (HIST1H4H), mRNA.                                                          |
| SNORD4A  | 2.28 | 1.45 NR_000010.1    | Homo sapiens small nucleolar RNA, C/D box 4A (SNORD4A) on chromosome 17.                                       |
| PTPRF    | 2.29 | 1.41 NM_130440.1    | Homo sapiens protein tyrosine phosphatase, receptor type, F (PTPRF), 2, mRNA.                                  |
| C1QTNF6  | 2.29 | 1.55 NM_031910.3    | Homo sapiens C1q and tumor necrosis factor related protein 6 (C1QTNF6), 1, mRNA.                               |
| MVD      | 2.29 | 1.48 NM_002461.1    | Homo sapiens mevalonate (diphospho) decarboxylase (MVD), mRNA.                                                 |
| ITGB5    | 2.29 | 1.34 NM_002213.3    | Homo sapiens integrin, beta 5 (ITGB5), mRNA. XM_944688 XM_944693                                               |
| ITFG3    | 2.29 | 1.42 NM_032039.1    | Homo sapiens integrin alpha FG-GAP repeat containing 3 (ITFG3), mRNA.                                          |
| MEF2D    | 2.3  | 1.45 NM_005920.2    | Homo sapiens myocyte enhancer factor 2D (MEF2D), mRNA.                                                         |
| TGIF1    | 2.3  | 1.55 NM_003244.2    | Homo sapiens TGFB-induced factor homeobox 1 (TGIF1), 4, mRNA.                                                  |
| CLN3     | 2.3  | 1.48 NM_000086.2    | Homo sapiens ceroid-lipofuscinosis, neuronal 3, juvenile (Batten, Spielmeier-Vogt disease) (CLN3), 2, mRNA.    |
| SLFN5    | 2.3  | 1.54 NM_144975.3    | Homo sapiens schlafen family member 5 (SLFN5), mRNA.                                                           |
| GSDML    | 2.3  | 1.49 NM_001042471.1 | Homo sapiens gasdermin-like (GSDML), 1, mRNA.                                                                  |
| C17orf62 | 2.3  | 1.46 NM_001100408.1 | Homo sapiens chromosome 17 open reading frame 62 (C17orf62), 3, mRNA.                                          |
| SERTAD3  | 2.31 | 1.46 NM_013368.2    | Homo sapiens SERTA domain containing 3 (SERTAD3), 1, mRNA.                                                     |
| DNAJC15  | 2.31 | 1.45 NM_013238.2    | Homo sapiens DnaJ (Hsp40) homolog, subfamily C, member 15 (DNAJC15), mRNA.                                     |
| CAPN1    | 2.31 | 1.39 NM_005186.2    | Homo sapiens calpain 1, (mu/l) large subunit (CAPN1), mRNA.                                                    |
| SULT1A4  | 2.31 | 1.44 NM_001017391.1 | Homo sapiens sulfotransferase family, cytosolic, 1A, phenol-preferring, member 4 (SULT1A4), 3, mRNA.           |
| NPTN     | 2.32 | 1.36 NM_017455.2    | Homo sapiens neuropilin (NPTN), alpha, mRNA.                                                                   |
| GBA2     | 2.32 | 1.49 NM_020944.2    | Homo sapiens glucosidase, beta (bile acid) 2 (GBA2), mRNA.                                                     |
| DEF8     | 2.32 | 1.45 NM_207514.1    | Homo sapiens differentially expressed in FDCP 8 homolog (mouse) (DEF8), 1, mRNA.                               |
| DEGS1    | 2.32 | 1.36 NM_003676.2    | Homo sapiens degenerative spermatocyte homolog 1, lipid desaturase (Drosophila) (DEGS1), 1, mRNA.              |
| BIN1     | 2.32 | 1.39 NM_139343.1    | Homo sapiens bridging integrator 1 (BIN1), 1, mRNA.                                                            |
| BTBD16   | 2.32 | 1.55 NM_144587.2    | Homo sapiens BTB (POZ) domain containing 16 (BTBD16), mRNA.                                                    |
| C1RL     | 2.32 | 1.49 NM_016546.1    | Homo sapiens complement component 1, r subcomponent-like (C1RL), mRNA.                                         |
| ATXN7L3  | 2.32 | 1.42 NM_001098833.1 | Homo sapiens ataxin 7-like 3 (ATXN7L3), 2, mRNA.                                                               |
| SPAG9    | 2.32 | 1.4 NM_003971.3     | Homo sapiens sperm associated antigen 9 (SPAG9), mRNA.                                                         |
| BCL3     | 2.33 | 1.48 NM_005178.2    | Homo sapiens B-cell CLL/lymphoma 3 (BCL3), mRNA.                                                               |
| RAPGEF1  | 2.33 | 1.46 NM_198679.1    | Homo sapiens Rap guanine nucleotide exchange factor (GEF) 1 (RAPGEF1), 2, mRNA.                                |
| ST3GAL4  | 2.33 | 1.48 NM_006278.1    | Homo sapiens ST3 beta-galactoside alpha-2,3-sialyltransferase 4 (ST3GAL4), mRNA.                               |
| TFG      | 2.33 | 1.34 NM_001007565.1 | Homo sapiens TRK-fused gene (TFG), 2, mRNA.                                                                    |
| WARS     | 2.33 | 1.35 NM_173701.1    | Homo sapiens tryptophanyl-tRNA synthetase (WARS), 2, mRNA.                                                     |
| TLL1     | 2.33 | 1.5 NM_012464.3     | Homo sapiens tolloid-like 1 (TLL1), mRNA.                                                                      |
| ZNF134   | 2.34 | 1.54 NM_003435.2    | Homo sapiens zinc finger protein 134 (ZNF134), mRNA.                                                           |
| MANBA    | 2.34 | 1.45 NM_005908.3    | Homo sapiens mannosidase, beta A, lysosomal (MANBA), mRNA.                                                     |
| CMAS     | 2.34 | 1.39 NM_018686.3    | Homo sapiens cytidine monophosphate N-acetylneuraminic acid synthetase (CMAS), mRNA.                           |
| TMEM157  | 2.34 | 1.47 NM_198507.1    | Homo sapiens transmembrane protein 157 (TMEM157), mRNA.                                                        |
| SLC7A8   | 2.35 | 1.52 NM_182728.1    | Homo sapiens solute carrier family 7 (cationic amino acid transporter, y+ system), member 8 (SLC7A8), 2, mRNA. |
| PDE1A    | 2.35 | 1.42 NM_001003683.1 | Homo sapiens phosphodiesterase 1A, calmodulin-dependent (PDE1A), 2, mRNA.                                      |
| WNT6     | 2.35 | 1.55 NM_006522.3    | Homo sapiens wingless-type MMTV integration site family, member 6 (WNT6), mRNA.                                |
| EFNA1    | 2.35 | 1.45 NM_004428.2    | Homo sapiens ephrin-A1 (EFNA1), 1, mRNA.                                                                       |

|          |      |                     |                                                                                                               |
|----------|------|---------------------|---------------------------------------------------------------------------------------------------------------|
| CLDN12   | 2.35 | 1.46 NM_012129.2    | Homo sapiens claudin 12 (CLDN12), mRNA.                                                                       |
| TMED9    | 2.36 | 1.38 NM_017510.4    | Homo sapiens transmembrane emp24 protein transport domain containing 9 (TMED9), mRNA.                         |
| YWHAZ    | 2.36 | 1.3 NM_003406.2     | Homo sapiens tyrosine 3-monooxygenase/tryptophan 5-monooxygenase activation protein                           |
| FAM89A   | 2.36 | 1.56 NM_198552.1    | Homo sapiens family with sequence similarity 89, member A (FAM89A), mRNA.                                     |
| TNFRSF1A | 2.37 | 1.39 NM_001065.2    | Homo sapiens tumor necrosis factor receptor superfamily, member 1A (TNFRSF1A), mRNA.                          |
| DHRS1    | 2.37 | 1.46 NM_138452.1    | Homo sapiens dehydrogenase/reductase (SDR family) member 1 (DHRS1), mRNA.                                     |
| MGST3    | 2.37 | 1.3 NM_004528.2     | Homo sapiens microsomal glutathione S-transferase 3 (MGST3), mRNA.                                            |
| SLC2A8   | 2.38 | 1.45 NM_014580.3    | Homo sapiens solute carrier family 2, (facilitated glucose transporter) member 8 (SLC2A8), mRNA.              |
| SNX8     | 2.38 | 1.45 NM_013321.1    | Homo sapiens sorting nexin 8 (SNX8), mRNA.                                                                    |
| MKNK2    | 2.38 | 1.37 NM_017572.2    | Homo sapiens MAP kinase interacting serine/threonine kinase 2 (MKNK2), 1, mRNA.                               |
| RAB4B    | 2.38 | 1.54 NM_016154.2    | Homo sapiens RAB4B, member RAS oncogene family (RAB4B), mRNA.                                                 |
| GPR56    | 2.38 | 1.41 NM_201524.1    | Homo sapiens G protein-coupled receptor 56 (GPR56), 2, mRNA.                                                  |
| CCNDBP1  | 2.38 | 1.39 NM_037370.1    | Homo sapiens cyclin D-type binding-protein 1 (CCNDBP1), 2, mRNA.                                              |
| CBLB     | 2.39 | 1.5 NM_170662.3     | Homo sapiens Cas-Br-M (murine) ecotropic retroviral transforming sequence b (CBLB), mRNA.                     |
| FABP3    | 2.39 | 1.59 NM_004102.3    | Homo sapiens fatty acid binding protein 3, muscle and heart (mammary-derived growth inhibitor) (FABP3), mRNA. |
| CTSB     | 2.39 | 1.47 NM_001908.3    | Homo sapiens cathepsin B (CTSB), 1, mRNA.                                                                     |
| RAB8B    | 2.39 | 1.46 NM_016530.2    | Homo sapiens RAB8B, member RAS oncogene family (RAB8B), mRNA.                                                 |
| NECAP2   | 2.39 | 1.46 NM_018090.3    | Homo sapiens NECAP endocytosis associated 2 (NECAP2), mRNA.                                                   |
| M-RIP    | 2.39 | 1.47 NM_201274.2    | Homo sapiens myosin phosphatase-Rho interacting protein (M-RIP), 2, mRNA.                                     |
| ITFG1    | 2.39 | 1.4 NM_030790.3     | Homo sapiens integrin alpha FG-GAP repeat containing 1 (ITFG1), mRNA.                                         |
| C7orf43  | 2.39 | 1.5 NM_018275.3     | Homo sapiens chromosome 7 open reading frame 43 (C7orf43), mRNA.                                              |
| EHD1     | 2.39 | 1.42 NM_006795.2    | Homo sapiens EH-domain containing 1 (EHD1), mRNA.                                                             |
| RABL4    | 2.4  | 1.51 NM_006860.2    | Homo sapiens RAB, member of RAS oncogene family-like 4 (RABL4), mRNA.                                         |
| PDE1A    | 2.4  | 1.48 NM_001003683.1 | Homo sapiens phosphodiesterase 1A, calmodulin-dependent (PDE1A), 2, mRNA.                                     |
| NADSYN1  | 2.4  | 1.52 NM_018161.4    | Homo sapiens NAD synthetase 1 (NADSYN1), mRNA.                                                                |
| PLXNB2   | 2.4  | 1.41 NM_012401.2    | Homo sapiens plexin B2 (PLXNB2), mRNA.                                                                        |
| OPRL1    | 2.41 | 1.56 NM_000913.3    | Homo sapiens opiate receptor-like 1 (OPRL1), 2, mRNA.                                                         |
| NFIL3    | 2.41 | 1.49 NM_005384.2    | Homo sapiens nuclear factor, interleukin 3 regulated (NFIL3), mRNA.                                           |
| EXOC7    | 2.41 | 1.42 NM_001013839.1 | Homo sapiens exocyst complex component 7 (EXOC7), 1, mRNA.                                                    |
| DPH3     | 2.41 | 1.47 NM_206831.1    | Homo sapiens DPH3, KTI11 homolog (S. cerevisiae) (DPH3), 1, mRNA.                                             |
| P4HB     | 2.41 | 1.35 NM_000918.3    | Homo sapiens procollagen-proline, 2-oxoglutarate 4-dioxygenase (proline 4-hydroxylase) mRNA.                  |
| PPP1R3F  | 2.41 | 1.56 NM_033215.3    | Homo sapiens protein phosphatase 1, regulatory (inhibitor) subunit 3F (PPP1R3F), mRNA.                        |
| ZFP36L2  | 2.41 | 1.53 NM_006887.3    | Homo sapiens zinc finger protein 36, C3H type-like 2 (ZFP36L2), mRNA.                                         |
| TCEA2    | 2.42 | 1.49 NM_198723.1    | Homo sapiens transcription elongation factor A (SII), 2 (TCEA2), 2, mRNA.                                     |
| SMUG1    | 2.42 | 1.44 NM_014311.1    | Homo sapiens single-strand-selective monofunctional uracil-DNA glycosylase 1 (SMUG1), mRNA.                   |
| GPR56    | 2.42 | 1.42 NM_201525.1    | Homo sapiens G protein-coupled receptor 56 (GPR56), 3, mRNA.                                                  |
| TRAPPC1  | 2.43 | 1.42 NM_021210.3    | Homo sapiens trafficking protein particle complex 1 (TRAPPC1), mRNA.                                          |
| SCAND1   | 2.43 | 1.48 NM_033630.1    | Homo sapiens SCAN domain containing 1 (SCAND1), 2, mRNA.                                                      |
| IQGAP1   | 2.43 | 1.41 NM_003870.3    | Homo sapiens IQ motif containing GTPase activating protein 1 (IQGAP1), mRNA.                                  |
| IDI1     | 2.43 | 1.46 NM_004508.2    | Homo sapiens isopentenyl-diphosphate delta isomerase 1 (IDI1), mRNA.                                          |
| G6PD     | 2.43 | 1.48 NM_000402.3    | Homo sapiens glucose-6-phosphate dehydrogenase (G6PD), 1, mRNA.                                               |
| C19orf62 | 2.43 | 1.4 NM_014173.2     | Homo sapiens chromosome 19 open reading frame 62 (C19orf62), 2, mRNA.                                         |
| HYI      | 2.43 | 1.54 NM_031207.2    | Homo sapiens hydroxypyruvate isomerase homolog (E. coli) (HYI), mRNA.                                         |
| PXMP2    | 2.43 | 1.49 NM_018663.1    | Homo sapiens peroxisomal membrane protein 2, 22kDa (PXMP2), mRNA.                                             |
| M6PRBP1  | 2.44 | 1.36 NM_005817.3    | Homo sapiens mannose-6-phosphate receptor binding protein 1 (M6PRBP1), mRNA.                                  |
| ADAMTSL4 | 2.44 | 1.53 NM_025008.3    | Homo sapiens ADAMTS-like 4 (ADAMTSL4), 2, mRNA.                                                               |
| MST1     | 2.44 | 1.55 NM_020998.2    | Homo sapiens macrophage stimulating 1 (hepatocyte growth factor-like) (MST1), mRNA.                           |
| ANKRD46  | 2.44 | 1.52 NM_198401.2    | Homo sapiens ankyrin repeat domain 46 (ANKRD46), mRNA.                                                        |
| FKRP     | 2.44 | 1.57 NM_024301.3    | Homo sapiens fukutin related protein (FKRP), 1, mRNA.                                                         |

|           |      |                     |                                                                                                                  |
|-----------|------|---------------------|------------------------------------------------------------------------------------------------------------------|
| TSC22D2   | 2.45 | 1.44 NM_014779.2    | Homo sapiens TSC22 domain family, member 2 (TSC22D2), mRNA.                                                      |
| UNC50     | 2.45 | 1.39 NM_014044.4    | Homo sapiens unc-50 homolog (C. elegans) (UNC50), mRNA.                                                          |
| SERPINH1  | 2.46 | 1.44 NM_001235.2    | Homo sapiens serpin peptidase inhibitor, clade H (heat shock protein 47), member 1, (collagen binding protein 1) |
| TNFSF9    | 2.46 | 1.4 NM_003811.2     | Homo sapiens tumor necrosis factor (ligand) superfamily, member 9 (TNFSF9), mRNA.                                |
| FAM39DP   | 2.46 | 1.53 NR_003659.1    | Homo sapiens family with sequence similarity 39, member D pseudogene (FAM39DP) on chromosome 15.                 |
| TTLL3     | 2.47 | 1.54 NM_015644.3    | Homo sapiens tubulin tyrosine ligase-like family, member 3 (TTLL3), 2, mRNA.                                     |
| LRP10     | 2.47 | 1.5 NM_014045.3     | Homo sapiens low density lipoprotein receptor-related protein 10 (LRP10), mRNA.                                  |
| SOCS3     | 2.47 | 1.53 NM_003955.3    | Homo sapiens suppressor of cytokine signaling 3 (SOCS3), mRNA.                                                   |
| F8A1      | 2.47 | 1.51 NM_012151.3    | Homo sapiens coagulation factor VIII-associated (intronic transcript) 1 (F8A1), mRNA.                            |
| FAM46B    | 2.47 | 1.5 NM_052943.2     | Homo sapiens family with sequence similarity 46, member B (FAM46B), mRNA.                                        |
| SLC43A2   | 2.47 | 1.52 NM_152346.1    | Homo sapiens solute carrier family 43, member 2 (SLC43A2), mRNA.                                                 |
| FBXO7     | 2.48 | 1.42 NM_001033024.1 | Homo sapiens F-box protein 7 (FBXO7), 2, mRNA.                                                                   |
| FGFR4     | 2.48 | 1.51 NM_213647.1    | Homo sapiens fibroblast growth factor receptor 4 (FGFR4), 3, mRNA.                                               |
| ACP2      | 2.48 | 1.52 NM_001610.1    | Homo sapiens acid phosphatase 2, lysosomal (ACP2), mRNA.                                                         |
| LOC124446 | 2.48 | 1.48 NM_001083613.1 | Homo sapiens hypothetical protein BC017488 (LOC124446), 1, mRNA.                                                 |
| FOXO4     | 2.49 | 1.53 NM_005938.2    | Homo sapiens forkhead box O4 (FOXO4), mRNA.                                                                      |
| PWWP2B    | 2.49 | 1.49 NM_138499.3    | Homo sapiens PWWP domain containing 2B (PWWP2B), 1, mRNA.                                                        |
| DNAH17    | 2.5  | 1.57 NM_003727.1    | Homo sapiens dynein, axonemal, heavy polypeptide 17 (DNAH17), mRNA.                                              |
| STAT2     | 2.5  | 1.46 NM_005419.2    | Homo sapiens signal transducer and activator of transcription 2, 113kDa (STAT2), mRNA.                           |
| DLGAP4    | 2.5  | 1.56 NM_001042486.1 | Homo sapiens discs, large (Drosophila) homolog-associated protein 4 (DLGAP4), 3, mRNA.                           |
| CCDC92    | 2.5  | 1.53 NM_025140.1    | Homo sapiens coiled-coil domain containing 92 (CCDC92), mRNA.                                                    |
| MGC18216  | 2.5  | 1.49 XM_927732.1    | PREDICTED: Homo sapiens hypothetical protein MGC18216 (MGC18216), mRNA.                                          |
| FAM103A1  | 2.5  | 1.5 NM_031452.2     | Homo sapiens family with sequence similarity 103, member A1 (FAM103A1), mRNA.                                    |
| SC4MOL    | 2.51 | 1.43 NM_001017369.1 | Homo sapiens sterol-C4-methyl oxidase-like (SC4MOL), 2, mRNA.                                                    |
| DUSP22    | 2.51 | 1.49 NM_020185.3    | Homo sapiens dual specificity phosphatase 22 (DUSP22), mRNA.                                                     |
| HSZFP36   | 2.52 | 1.54 NM_001080493.1 | Homo sapiens ZFP-36 for a zinc finger protein (HSZFP36), mRNA.                                                   |
| RAP1B     | 2.53 | 1.55 NM_015646.4    | Homo sapiens RAP1B, member of RAS oncogene family (RAP1B), 1, mRNA.                                              |
| TSHZ2     | 2.53 | 1.55 NM_173485.4    | Homo sapiens teashirt zinc finger homeobox 2 (TSHZ2), mRNA.                                                      |
| SERPINI1  | 2.53 | 1.52 NM_005025.3    | Homo sapiens serpin peptidase inhibitor, clade I (neuroserpin), member 1 (SERPINI1), mRNA.                       |
| BET1      | 2.54 | 1.48 NM_005868.4    | Homo sapiens blocked early in transport 1 homolog (S. cerevisiae) (BET1), mRNA.                                  |
| PIM1      | 2.54 | 1.51 NM_002648.2    | Homo sapiens pim-1 oncogene (PIM1), mRNA.                                                                        |
| PDE4D     | 2.55 | 1.43 NM_006203.3    | Homo sapiens phosphodiesterase 4D, cAMP-specific (phosphodiesterase E3 dunce homolog, Drosophila)                |
| TUFT1     | 2.55 | 1.47 NM_020127.1    | Homo sapiens tuftelin 1 (TUFT1), mRNA.                                                                           |
| CASP4     | 2.55 | 1.49 NM_001225.3    | Homo sapiens caspase 4, apoptosis-related cysteine peptidase (CASP4), alpha, mRNA.                               |
| RHBDD2    | 2.55 | 1.42 NM_001040456.1 | Homo sapiens rhomboid domain containing 2 (RHBDD2), 1, mRNA.                                                     |
| LOC643272 | 2.56 | 1.6 XM_926633.1     | PREDICTED: Homo sapiens hypothetical protein LOC643272 (LOC643272), mRNA.                                        |
| SCHIP1    | 2.56 | 1.55 NM_014575.2    | Homo sapiens schwannomin interacting protein 1 (SCHIP1), mRNA.                                                   |
| LOC389599 | 2.56 | 1.54 XM_001131588.1 | PREDICTED: Homo sapiens similar to amyotrophic lateral sclerosis 2 (juvenile) chromosome region, candidate 2     |
| SLC46A1   | 2.57 | 1.55 NM_080669.3    | Homo sapiens solute carrier family 46 (folate transporter), member 1 (SLC46A1), mRNA.                            |
| OAS1      | 2.57 | 1.52 NM_002534.2    | Homo sapiens 2',5'-oligoadenylate synthetase 1, 40/46kDa (OAS1), 2, mRNA.                                        |
| CD9       | 2.57 | 1.48 NM_001769.2    | Homo sapiens CD9 molecule (CD9), mRNA.                                                                           |
| ARID5B    | 2.58 | 1.45 NM_032199.1    | Homo sapiens AT rich interactive domain 5B (MRF1-like) (ARID5B), mRNA.                                           |
| BAK1      | 2.58 | 1.53 NM_001188.3    | Homo sapiens BCL2-antagonist/killer 1 (BAK1), mRNA.                                                              |
| C8orf40   | 2.59 | 1.54 NM_138436.2    | Homo sapiens chromosome 8 open reading frame 40 (C8orf40), mRNA.                                                 |
| GPR175    | 2.59 | 1.51 NM_016372.1    | Homo sapiens G protein-coupled receptor 175 (GPR175), mRNA.                                                      |
| EPHA2     | 2.6  | 1.54 NM_004431.2    | Homo sapiens EPH receptor A2 (EPHA2), mRNA.                                                                      |
| PRKCDBP   | 2.6  | 1.48 NM_145040.2    | Homo sapiens protein kinase C, delta binding protein (PRKCDBP), mRNA.                                            |
| FAM120B   | 2.6  | 1.49 NM_032448.1    | Homo sapiens family with sequence similarity 120B (FAM120B), mRNA.                                               |
| SORCS2    | 2.61 | 1.62 NM_020777.1    | Homo sapiens sortilin-related VPS10 domain containing receptor 2 (SORCS2), mRNA.                                 |

|           |      |                     |                                                                                                           |
|-----------|------|---------------------|-----------------------------------------------------------------------------------------------------------|
|           | 2.61 | 1.59 AK000776       | Homo sapiens cDNA FLJ20769 fis, clone COL06674                                                            |
| CORO6     | 2.61 | 1.61 NM_032854.2    | Homo sapiens coronin 6 (CORO6), mRNA.                                                                     |
| NR1H2     | 2.62 | 1.55 NM_007121.2    | Homo sapiens nuclear receptor subfamily 1, group H, member 2 (NR1H2), mRNA.                               |
| SLC35D2   | 2.62 | 1.56 NM_007001.1    | Homo sapiens solute carrier family 35, member D2 (SLC35D2), mRNA.                                         |
| RHOC      | 2.62 | 1.46 NM_001042678.1 | Homo sapiens ras homolog gene family, member C (RHOC), 2, mRNA.                                           |
| AGPAT2    | 2.62 | 1.5 NM_006412.3     | Homo sapiens 1-acylglycerol-3-phosphate O-acyltransferase 2 (lysophosphatidic acid acyltransferase, beta) |
| JUP       | 2.62 | 1.4 NM_002230.1     | Homo sapiens junction plakoglobin (JUP), 1, mRNA.                                                         |
| LHFPL2    | 2.62 | 1.52 NM_005779.1    | Homo sapiens lipoma HMGIC fusion partner-like 2 (LHFPL2), mRNA.                                           |
| C9orf95   | 2.63 | 1.59 NM_017881.1    | Homo sapiens chromosome 9 open reading frame 95 (C9orf95), mRNA.                                          |
| DHRS2     | 2.63 | 1.63 NM_182908.3    | Homo sapiens dehydrogenase/reductase (SDR family) member 2 (DHRS2), 1, mRNA.                              |
| ECHDC2    | 2.63 | 1.53 NM_018281.2    | Homo sapiens enoyl Coenzyme A hydratase domain containing 2 (ECHDC2), mRNA.                               |
| LPAR5     | 2.63 | 1.62 NM_020400.4    | Homo sapiens lysophosphatidic acid receptor 5 (LPAR5), mRNA.                                              |
| ATP8B4    | 2.63 | 1.57 NM_024837.2    | Homo sapiens ATPase, class I, type 8B, member 4 (ATP8B4), mRNA.                                           |
| BMP1      | 2.63 | 1.53 NM_006129.2    | Homo sapiens bone morphogenetic protein 1 (BMP1), BMP1-3, mRNA.                                           |
|           | 2.63 | 1.62 AK024898       | Homo sapiens cDNA: FLJ21245 fis, clone COL01184                                                           |
| GRB10     | 2.64 | 1.56 NM_001001555.1 | Homo sapiens growth factor receptor-bound protein 10 (GRB10), 4, mRNA.                                    |
| PTTG1IP   | 2.64 | 1.45 NM_004339.2    | Homo sapiens pituitary tumor-transforming 1 interacting protein (PTTG1IP), mRNA.                          |
| LXN       | 2.64 | 1.4 NM_020169.2     | Homo sapiens latexin (LXN), mRNA.                                                                         |
| LDHD      | 2.65 | 1.64 NM_194436.1    | Homo sapiens lactate dehydrogenase D (LDHD), 2, mRNA.                                                     |
| CIDEC     | 2.65 | 1.62 NM_022094.2    | Homo sapiens cell death-inducing DFFA-like effector c (CIDEC), mRNA.                                      |
| SULT1A1   | 2.65 | 1.57 NM_177536.1    | Homo sapiens sulfotransferase family, cytosolic, 1A, phenol-preferring, member 1 (SULT1A1), 5, mRNA.      |
| ANTXR1    | 2.65 | 1.55 NM_032208.1    | Homo sapiens anthrax toxin receptor 1 (ANTXR1), 1, mRNA.                                                  |
| MGC59937  | 2.65 | 1.62 NM_199001.1    | Homo sapiens Similar to RIKEN cDNA 2310002J15 gene (MGC59937), mRNA.                                      |
| LOC646567 | 2.65 | 1.47 XM_929503.2    | PREDICTED: Homo sapiens similar to HSPC307 (LOC646567), mRNA.                                             |
| CTBS      | 2.66 | 1.57 NM_004388.1    | Homo sapiens chitobiase, di-N-acetyl- (CTBS), mRNA.                                                       |
| DDR1      | 2.66 | 1.48 NM_013993.2    | Homo sapiens discoidin domain receptor tyrosine kinase 1 (DDR1), 1, mRNA.                                 |
| ANXA8     | 2.66 | 1.53 NM_001630.1    | Homo sapiens annexin A8 (ANXA8), mRNA.                                                                    |
| PLEKHA1   | 2.66 | 1.49 NM_001001974.1 | Homo sapiens pleckstrin homology domain containing, family A (phosphoinositide binding specific) member 1 |
| TMEM116   | 2.66 | 1.57 NM_138341.1    | Homo sapiens transmembrane protein 116 (TMEM116), mRNA.                                                   |
| TRIM26    | 2.66 | 1.5 NM_003449.3     | Homo sapiens tripartite motif-containing 26 (TRIM26), mRNA.                                               |
| OAS1      | 2.67 | 1.59 NM_001032409.1 | Homo sapiens 2',5'-oligoadenylate synthetase 1, 40/46kDa (OAS1), 3, mRNA.                                 |
| THBS1     | 2.67 | 1.57 NM_003246.2    | Homo sapiens thrombospondin 1 (THBS1), mRNA.                                                              |
| GSTT1     | 2.68 | 1.47 NM_000853.1    | Homo sapiens glutathione S-transferase theta 1 (GSTT1), mRNA.                                             |
| MEOX1     | 2.68 | 1.49 NM_001040002.1 | Homo sapiens mesenchyme homeobox 1 (MEOX1), 3, mRNA.                                                      |
|           | 2.68 | 1.59 BQ188486       | UI-E-EJ1-ajw-b-16-0-UI.r1 UI-E-EJ1 Homo sapiens cDNA clone UI-E-EJ1-ajw-b-16-0-UI 5, mRNA sequence        |
| RCN1      | 2.68 | 1.41 NM_002901.1    | Homo sapiens reticulocalbin 1, EF-hand calcium binding domain (RCN1), mRNA.                               |
| BTBD3     | 2.68 | 1.47 NM_014962.2    | Homo sapiens BTB (POZ) domain containing 3 (BTBD3), 1, mRNA.                                              |
| DTNA      | 2.69 | 1.62 NM_001392.3    | Homo sapiens dystrobrevin, alpha (DTNA), 7, mRNA.                                                         |
| ALS2CR2   | 2.69 | 1.55 NM_018571.5    | Homo sapiens amyotrophic lateral sclerosis 2 (juvenile) chromosome region, candidate 2 (ALS2CR2), mRNA.   |
| MMP7      | 2.69 | 1.65 NM_002423.3    | Homo sapiens matrix metalloproteinase 7 (matrilysin, uterine) (MMP7), mRNA.                               |
| NSDHL     | 2.69 | 1.47 NM_015922.1    | Homo sapiens NAD(P) dependent steroid dehydrogenase-like (NSDHL), mRNA.                                   |
| ZC3H12A   | 2.69 | 1.57 NM_025079.1    | Homo sapiens zinc finger CCCH-type containing 12A (ZC3H12A), mRNA.                                        |
| SMPD1     | 2.7  | 1.64 NM_000543.3    | Homo sapiens sphingomyelin phosphodiesterase 1, acid lysosomal (SMPD1), 1, mRNA.                          |
| OGDH      | 2.7  | 1.5 NM_002541.2     | Homo sapiens oxoglutarate (alpha-ketoglutarate) dehydrogenase (lipoamide) (OGDH), 1, mRNA.                |
| RHBDD2    | 2.71 | 1.46 NM_001040456.1 | Homo sapiens rhomboid domain containing 2 (RHBDD2), 1, mRNA.                                              |
| ELF4      | 2.72 | 1.52 NM_001421.2    | Homo sapiens E74-like factor 4 (ets domain transcription factor) (ELF4), mRNA.                            |
| SRPR      | 2.72 | 1.51 NM_003139.2    | Homo sapiens signal recognition particle receptor ('docking protein') (SRPR), mRNA.                       |
| GPER      | 2.72 | 1.52 NM_001039966.1 | Homo sapiens G protein-coupled estrogen receptor 1 (GPER), 3, mRNA.                                       |
| PLAUR     | 2.72 | 1.57 NM_001005376.1 | Homo sapiens plasminogen activator, urokinase receptor (PLAUR), 2, mRNA.                                  |

|           |      |                     |                                                                                                                                                |
|-----------|------|---------------------|------------------------------------------------------------------------------------------------------------------------------------------------|
| TP53I3    | 2.72 | 1.55 NM_147184.1    | Homo sapiens tumor protein p53 inducible protein 3 (TP53I3), 2, mRNA.                                                                          |
|           | 2.72 | 1.54 AK130294       | Homo sapiens cDNA FLJ26784 fis, clone PRS04220                                                                                                 |
| LIMK2     | 2.73 | 1.68 NM_001031801.1 | Homo sapiens LIM domain kinase 2 (LIMK2), 1, mRNA.                                                                                             |
| ADM       | 2.73 | 1.45 NM_001124.1    | Homo sapiens adrenomedullin (ADM), mRNA.                                                                                                       |
| EXT2      | 2.74 | 1.57 NM_207122.1    | Homo sapiens exostoses (multiple) 2 (EXT2), 2, mRNA.                                                                                           |
| SLC9A1    | 2.74 | 1.54 NM_003047.2    | Homo sapiens solute carrier family 9 (sodium/hydrogen exchanger), member 1 (antiporter, Na <sup>+</sup> /H <sup>+</sup> , amiloride sensitive) |
| C20orf24  | 2.74 | 1.37 NM_199483.1    | Homo sapiens chromosome 20 open reading frame 24 (C20orf24), 2, mRNA.                                                                          |
| SPPL2A    | 2.74 | 1.5 NM_032802.3     | Homo sapiens signal peptide peptidase-like 2A (SPPL2A), mRNA.                                                                                  |
| VAMP8     | 2.75 | 1.45 NM_003761.2    | Homo sapiens vesicle-associated membrane protein 8 (endobrevin) (VAMP8), mRNA.                                                                 |
| SCARB1    | 2.75 | 1.47 NM_005505.3    | Homo sapiens scavenger receptor class B, member 1 (SCARB1), mRNA.                                                                              |
| ANXA2     | 2.76 | 1.38 NM_001002858.1 | Homo sapiens annexin A2 (ANXA2), 1, mRNA.                                                                                                      |
| RFK       | 2.76 | 1.64 NM_018339.4    | Homo sapiens riboflavin kinase (RFK), mRNA.                                                                                                    |
| PLAUR     | 2.76 | 1.65 NM_002659.2    | Homo sapiens plasminogen activator, urokinase receptor (PLAUR), 1, mRNA.                                                                       |
| G6PD      | 2.76 | 1.48 NM_000402.3    | Homo sapiens glucose-6-phosphate dehydrogenase (G6PD), 1, mRNA.                                                                                |
| C20orf24  | 2.76 | 1.38 NM_018840.2    | Homo sapiens chromosome 20 open reading frame 24 (C20orf24), 1, mRNA.                                                                          |
| TMEM189   | 2.76 | 1.62 NM_199129.1    | Homo sapiens transmembrane protein 189 (TMEM189), mRNA.                                                                                        |
| TULP4     | 2.77 | 1.59 NM_001007466.1 | Homo sapiens tubby like protein 4 (TULP4), 2, mRNA.                                                                                            |
| TAGLN     | 2.77 | 1.64 NM_003186.3    | Homo sapiens transgelin (TAGLN), 2, mRNA.                                                                                                      |
| AGPAT2    | 2.78 | 1.51 NM_001012727.1 | Homo sapiens 1-acylglycerol-3-phosphate O-acyltransferase 2 (lysophosphatidic acid acyltransferase, beta)                                      |
| ITGB5     | 2.78 | 1.43 NM_002213.3    | Homo sapiens integrin, beta 5 (ITGB5), mRNA. XM_944688 XM_944693                                                                               |
| SNORD38B  | 2.78 | 1.66 NR_001457.1    | Homo sapiens small nucleolar RNA, C/D box 38B (SNORD38B) on chromosome 1.                                                                      |
| MIDN      | 2.79 | 1.55 NM_177401.4    | Homo sapiens midnolin (MIDN), mRNA.                                                                                                            |
| ACSS2     | 2.79 | 1.49 NM_018677.2    | Homo sapiens acyl-CoA synthetase short-chain family member 2 (ACSS2), 1, mRNA.                                                                 |
| OLR1      | 2.79 | 1.44 NM_002543.3    | Homo sapiens oxidized low density lipoprotein (lectin-like) receptor 1 (OLR1), mRNA.                                                           |
| COL15A1   | 2.79 | 1.57 NM_001855.3    | Homo sapiens collagen, type XV, alpha 1 (COL15A1), mRNA.                                                                                       |
| LOC388588 | 2.79 | 1.62 XM_932890.2    | PREDICTED: Homo sapiens hypothetical LOC388588, 2 (LOC388588), mRNA.                                                                           |
| MB        | 2.8  | 1.64 NM_005368.2    | Homo sapiens myoglobin (MB), 1, mRNA.                                                                                                          |
| TRIP4     | 2.8  | 1.57 NM_016213.3    | Homo sapiens thyroid hormone receptor interactor 4 (TRIP4), mRNA.                                                                              |
| CTSB      | 2.8  | 1.61 NM_147780.2    | Homo sapiens cathepsin B (CTSB), 2, mRNA.                                                                                                      |
| COL4A5    | 2.81 | 1.51 NM_000495.3    | Homo sapiens collagen, type IV, alpha 5 (Alport syndrome) (COL4A5), 1, mRNA.                                                                   |
| ZYX       | 2.81 | 1.5 NM_003461.4     | Homo sapiens zyxin (ZYX), 1, mRNA.                                                                                                             |
| BIN1      | 2.81 | 1.49 NM_139346.1    | Homo sapiens bridging integrator 1 (BIN1), 4, mRNA.                                                                                            |
| APBB3     | 2.81 | 1.57 NM_133172.2    | Homo sapiens amyloid beta (A4) precursor protein-binding, family B, member 3 (APBB3), 3, mRNA.                                                 |
| LOC220686 | 2.81 | 1.62 NM_199283.4    | Homo sapiens hypothetical protein LOC220686 (LOC220686), mRNA.                                                                                 |
| C6orf128  | 2.81 | 1.64 NM_145316.2    | Homo sapiens chromosome 6 open reading frame 128 (C6orf128), mRNA.                                                                             |
| CSAG3B    | 2.81 | 1.53 NM_001080848.1 | Homo sapiens CSAG family, member 3B (CSAG3B), mRNA.                                                                                            |
| ASAH3L    | 2.82 | 1.67 NM_001010887.2 | Homo sapiens N-acylsphingosine amidohydrolase 3-like (ASAH3L), mRNA.                                                                           |
| CTSL1     | 2.82 | 1.43 NM_145918.2    | Homo sapiens cathepsin L1 (CTSL1), 2, mRNA.                                                                                                    |
| CSAG1     | 2.82 | 1.68 NM_153478.1    | Homo sapiens chondrosarcoma associated gene 1 (CSAG1), a, mRNA.                                                                                |
| PPP2R1B   | 2.83 | 1.63 NM_181699.2    | Homo sapiens protein phosphatase 2 (formerly 2A), regulatory subunit A, beta isoform (PPP2R1B), 2, mRNA.                                       |
| ARHGAP28  | 2.83 | 1.65 NM_001010000.1 | Homo sapiens Rho GTPase activating protein 28 (ARHGAP28), 1, mRNA.                                                                             |
| BAMBI     | 2.83 | 1.5 NM_012342.2     | Homo sapiens BMP and activin membrane-bound inhibitor homolog ( <i>Xenopus laevis</i> ) (BAMBI), mRNA.                                         |
| BDNF      | 2.83 | 1.61 NM_001709.3    | Homo sapiens brain-derived neurotrophic factor (BDNF), 4, mRNA.                                                                                |
| KLF13     | 2.84 | 1.54 NM_015995.2    | Homo sapiens Kruppel-like factor 13 (KLF13), mRNA.                                                                                             |
| FLNB      | 2.84 | 1.49 NM_001457.1    | Homo sapiens filamin B, beta (actin binding protein 278) (FLNB), mRNA.                                                                         |
| AKAP13    | 2.84 | 1.6 NM_144767.3     | Homo sapiens A kinase (PRKA) anchor protein 13 (AKAP13), 3, mRNA.                                                                              |
| DPH3      | 2.84 | 1.59 NM_001047434.1 | Homo sapiens DPH3, KTI11 homolog ( <i>S. cerevisiae</i> ) (DPH3), 2, mRNA.                                                                     |
| SLC16A5   | 2.84 | 1.56 NM_004695.2    | Homo sapiens solute carrier family 16, member 5 (monocarboxylic acid transporter 6) (SLC16A5), mRNA.                                           |
| SPAG9     | 2.84 | 1.56 NM_003971.3    | Homo sapiens sperm associated antigen 9 (SPAG9), mRNA.                                                                                         |

|           |      |                     |                                                                                                            |
|-----------|------|---------------------|------------------------------------------------------------------------------------------------------------|
| OTUD1     | 2.84 | 1.63 XM_001134465.1 | PREDICTED: Homo sapiens OTU domain containing 1 (OTUD1), mRNA.                                             |
| C10orf26  | 2.84 | 1.65 NM_001083913.1 | Homo sapiens chromosome 10 open reading frame 26 (C10orf26), 1, mRNA.                                      |
| PTS       | 2.85 | 1.46 NM_000317.1    | Homo sapiens 6-pyruvoyltetrahydropterin synthase (PTS), mRNA.                                              |
| SEC61A1   | 2.85 | 1.45 NM_013336.3    | Homo sapiens Sec61 alpha 1 subunit ( <i>S. cerevisiae</i> ) (SEC61A1), mRNA.                               |
| C15orf39  | 2.85 | 1.6 NM_015492.4     | Homo sapiens chromosome 15 open reading frame 39 (C15orf39), mRNA.                                         |
| UPP1      | 2.86 | 1.54 NM_003364.2    | Homo sapiens uridine phosphorylase 1 (UPP1), 1, mRNA.                                                      |
| GAS6      | 2.86 | 1.68 NM_000820.1    | Homo sapiens growth arrest-specific 6 (GAS6), mRNA.                                                        |
| ARG2      | 2.87 | 1.68 NM_001172.3    | Homo sapiens arginase, type II (ARG2), mRNA.                                                               |
| LYPLA2    | 2.87 | 1.6 NM_007260.2     | Homo sapiens lysophospholipase II (LYPLA2), mRNA.                                                          |
| GADD45A   | 2.87 | 1.53 NM_001924.2    | Homo sapiens growth arrest and DNA-damage-inducible, alpha (GADD45A), mRNA.                                |
| ERCC6     | 2.88 | 1.67 NM_000124.1    | Homo sapiens excision repair cross-complementing repair deficiency, complementation group 6 (ERCC6), mRNA. |
| POLD4     | 2.88 | 1.67 NM_021173.2    | Homo sapiens polymerase (DNA-directed), delta 4 (POLD4), mRNA.                                             |
| RAB4B     | 2.89 | 1.68 NM_016154.3    | Homo sapiens RAB4B, member RAS oncogene family (RAB4B), mRNA.                                              |
| IFNGR1    | 2.89 | 1.54 NM_000416.1    | Homo sapiens interferon gamma receptor 1 (IFNGR1), mRNA.                                                   |
| MEOX1     | 2.89 | 1.6 NM_001040002.1  | Homo sapiens mesenchyme homeobox 1 (MEOX1), 3, mRNA.                                                       |
| KCNC4     | 2.89 | 1.68 NM_004978.3    | Homo sapiens potassium voltage-gated channel, Shaw-related subfamily, member 4 (KCNC4), 1, mRNA.           |
| LOC652541 | 2.89 | 1.68 XM_942032.1    | PREDICTED: Homo sapiens hypothetical protein LOC652541 (LOC652541), mRNA.                                  |
| FIBCD1    | 2.89 | 1.6 NM_032843.3     | Homo sapiens fibrinogen C domain containing 1 (FIBCD1), mRNA.                                              |
| B4GALT4   | 2.9  | 1.6 NM_003778.3     | Homo sapiens UDP-Gal:betaGlcNAc beta 1,4- galactosyltransferase, polypeptide 4 (B4GALT4), 2, mRNA.         |
| C6orf81   | 2.9  | 1.69 NM_145028.3    | Homo sapiens chromosome 6 open reading frame 81 (C6orf81), mRNA.                                           |
| C10orf56  | 2.9  | 1.61 NM_153367.2    | Homo sapiens chromosome 10 open reading frame 56 (C10orf56), mRNA.                                         |
| DAG1      | 2.91 | 1.48 NM_004393.2    | Homo sapiens dystroglycan 1 (dystrophin-associated glycoprotein 1) (DAG1), mRNA.                           |
| PLCG2     | 2.91 | 1.62 NM_002661.2    | Homo sapiens phospholipase C, gamma 2 (phosphatidylinositol-specific) (PLCG2), mRNA.                       |
| SURF4     | 2.91 | 1.51 NM_033161.2    | Homo sapiens surfeit 4 (SURF4), mRNA.                                                                      |
| SLC5A3    | 2.92 | 1.7 NM_006933.4     | Homo sapiens solute carrier family 5 (inositol transporters), member 3 (SLC5A3), mRNA.                     |
| HCST      | 2.92 | 1.7 NM_001007469.1  | Homo sapiens hematopoietic cell signal transducer (HCST), 2, mRNA.                                         |
| DENND3    | 2.92 | 1.63 NM_014957.2    | Homo sapiens DENN/MADD domain containing 3 (DENND3), mRNA.                                                 |
| SNF1LK    | 2.93 | 1.5 NM_173354.3     | Homo sapiens SNF1-like kinase (SNF1LK), mRNA.                                                              |
| AXL       | 2.93 | 1.63 NM_021913.2    | Homo sapiens AXL receptor tyrosine kinase (AXL), 1, mRNA.                                                  |
| SUSD2     | 2.93 | 1.67 NM_019601.3    | Homo sapiens sushi domain containing 2 (SUSD2), mRNA.                                                      |
| C19orf28  | 2.93 | 1.56 NM_174983.3    | Homo sapiens chromosome 19 open reading frame 28 (C19orf28), 3, mRNA.                                      |
| BASP1     | 2.93 | 1.38 NM_006317.3    | Homo sapiens brain abundant, membrane attached signal protein 1 (BASP1), mRNA.                             |
| RAB43     | 2.94 | 1.66 NM_198490.1    | Homo sapiens RAB43, member RAS oncogene family (RAB43), mRNA.                                              |
| GRB10     | 2.94 | 1.66 NM_005311.3    | Homo sapiens growth factor receptor-bound protein 10 (GRB10), 1, mRNA.                                     |
| LAMP2     | 2.94 | 1.54 NM_002294.1    | Homo sapiens lysosomal-associated membrane protein 2 (LAMP2), LAMP2A, mRNA.                                |
| ZNF503    | 2.94 | 1.63 NM_032772.3    | Homo sapiens zinc finger protein 503 (ZNF503), mRNA.                                                       |
| ZFAND3    | 2.94 | 1.63 NM_021943.1    | Homo sapiens zinc finger, AN1-type domain 3 (ZFAND3), mRNA.                                                |
| DDX58     | 2.95 | 1.69 NM_014314.3    | Homo sapiens DEAD (Asp-Glu-Ala-Asp) box polypeptide 58 (DDX58), mRNA.                                      |
| ZC3HAV1   | 2.95 | 1.56 NM_020119.3    | Homo sapiens zinc finger CCCH-type, antiviral 1 (ZC3HAV1), 1, mRNA.                                        |
| AGRN      | 2.96 | 1.61 NM_198576.2    | Homo sapiens agrin (AGRN), mRNA.                                                                           |
| TMC6      | 2.96 | 1.61 NM_007267.5    | Homo sapiens transmembrane channel-like 6 (TMC6), mRNA.                                                    |
| HTATIP2   | 2.97 | 1.5 NM_006410.3     | Homo sapiens HIV-1 Tat interactive protein 2, 30kDa (HTATIP2), mRNA.                                       |
| SULT1A3   | 2.97 | 1.63 NM_003166.3    | Homo sapiens sulfotransferase family, cytosolic, 1A, phenol-preferring, member 3 (SULT1A3), 1, mRNA.       |
| CACNB2    | 2.97 | 1.68 NM_201572.1    | Homo sapiens calcium channel, voltage-dependent, beta 2 subunit (CACNB2), 8, mRNA.                         |
| APOBEC3C  | 2.97 | 1.68 NM_014508.2    | Homo sapiens apolipoprotein B mRNA editing enzyme, catalytic polypeptide-like 3C (APOBEC3C), mRNA.         |
| ITGB5     | 2.98 | 1.55 NM_002213.3    | Homo sapiens integrin, beta 5 (ITGB5), mRNA. XM_944688 XM_944693                                           |
| PPP1R3C   | 2.99 | 1.6 NM_005398.4     | Homo sapiens protein phosphatase 1, regulatory (inhibitor) subunit 3C (PPP1R3C), mRNA.                     |
| GATS      | 2.99 | 1.69 NM_178831.4    | Homo sapiens opposite strand transcription unit to STAG3 (GATS), mRNA.                                     |
| HSPB8     | 3    | 1.63 NM_014365.2    | Homo sapiens heat shock 22kDa protein 8 (HSPB8), mRNA.                                                     |

|           |      |                     |                                                                                           |
|-----------|------|---------------------|-------------------------------------------------------------------------------------------|
| PDLIM7    | 3    | 1.63 NM_213636.1    | Homo sapiens PDZ and LIM domain 7 (enigma) (PDLIM7), 4, mRNA.                             |
| CDH10     | 3    | 1.63 NM_006727.2    | Homo sapiens cadherin 10, type 2 (T2-cadherin) (CDH10), mRNA.                             |
| ISYNA1    | 3.01 | 1.73 NM_016368.3    | Homo sapiens myo-inositol 1-phosphate synthase A1 (ISYNA1), mRNA.                         |
| DDB2      | 3.02 | 1.72 NM_000107.1    | Homo sapiens damage-specific DNA binding protein 2, 48kDa (DDB2), mRNA.                   |
| POFUT2    | 3.02 | 1.62 NM_133635.4    | Homo sapiens protein O-fucosyltransferase 2 (POFUT2), 3, mRNA.                            |
| KIAA0323  | 3.03 | 1.68 NM_015299.2    | Homo sapiens KIAA0323 (KIAA0323), mRNA.                                                   |
| SALL4     | 3.04 | 1.6 NM_020436.2     | Homo sapiens sal-like 4 (Drosophila) (SALL4), mRNA.                                       |
| IFIH1     | 3.04 | 1.67 NM_022168.2    | Homo sapiens interferon induced with helicase C domain 1 (IFIH1), mRNA.                   |
| PPL       | 3.04 | 1.73 NM_002705.4    | Homo sapiens periplakin (PPL), mRNA.                                                      |
| TM7SF3    | 3.04 | 1.68 NM_016551.1    | Homo sapiens transmembrane 7 superfamily member 3 (TM7SF3), mRNA.                         |
| TCP11L1   | 3.04 | 1.68 NM_018393.2    | Homo sapiens t-complex 11 (mouse)-like 1 (TCP11L1), mRNA.                                 |
| TSPAN31   | 3.05 | 1.66 NM_005981.3    | Homo sapiens tetraspanin 31 (TSPAN31), mRNA.                                              |
| SMPD1     | 3.05 | 1.74 NM_001007593.1 | Homo sapiens sphingomyelin phosphodiesterase 1, acid lysosomal (SMPD1), 2, mRNA.          |
| CD276     | 3.05 | 1.59 NM_001024736.1 | Homo sapiens CD276 molecule (CD276), 1, mRNA. XM_945872 XM_945874                         |
| APM-1     | 3.05 | 1.65 XM_113971.4    | PREDICTED: Homo sapiens BTB/POZ-zinc finger protein-like (APM-1), mRNA.                   |
| UGP2      | 3.06 | 1.66 NM_006759.3    | Homo sapiens UDP-glucose pyrophosphorylase 2 (UGP2), 1, mRNA.                             |
| JUP       | 3.06 | 1.67 NM_002230.1    | Homo sapiens junction plakoglobin (JUP), 1, mRNA.                                         |
| CTSD      | 3.06 | 1.59 NM_001909.3    | Homo sapiens cathepsin D (CTSD), mRNA.                                                    |
| 2-Mar     | 3.06 | 1.73 NM_001005415.1 | Homo sapiens membrane-associated ring finger (C3HC4) 2 (MARCH2), 2, mRNA.                 |
| ANKRD34A  | 3.06 | 1.74 NM_001039888.2 | Homo sapiens ankyrin repeat domain 34A (ANKRD34A), mRNA.                                  |
| DLX3      | 3.07 | 1.74 NM_005220.2    | Homo sapiens distal-less homeobox 3 (DLX3), mRNA.                                         |
| LIMA1     | 3.07 | 1.52 NM_016357.3    | Homo sapiens LIM domain and actin binding 1 (LIMA1), mRNA.                                |
| ADAMTSL4  | 3.07 | 1.69 NM_025008.3    | Homo sapiens ADAMTS-like 4 (ADAMTSL4), 2, mRNA.                                           |
| POFUT2    | 3.07 | 1.61 NM_133635.4    | Homo sapiens protein O-fucosyltransferase 2 (POFUT2), 3, mRNA.                            |
| PDIA5     | 3.08 | 1.63 NM_006810.2    | Homo sapiens protein disulfide isomerase family A, member 5 (PDIA5), mRNA.                |
| PTGES     | 3.08 | 1.54 NM_004878.3    | Homo sapiens prostaglandin E synthase (PTGES), mRNA.                                      |
| S100A16   | 3.09 | 1.57 NM_080388.1    | Homo sapiens S100 calcium binding protein A16 (S100A16), mRNA.                            |
| CCDC120   | 3.09 | 1.68 NM_033626.2    | Homo sapiens coiled-coil domain containing 120 (CCDC120), mRNA.                           |
| MAGED2    | 3.1  | 1.7 NM_201222.1     | Homo sapiens melanoma antigen family D, 2 (MAGED2), 3, mRNA.                              |
| SNCG      | 3.1  | 1.62 NM_003087.1    | Homo sapiens synuclein, gamma (breast cancer-specific protein 1) (SNCG), mRNA.            |
| BHLHB2    | 3.11 | 1.55 NM_003670.1    | Homo sapiens basic helix-loop-helix domain containing, class B, 2 (BHLHB2), mRNA.         |
| MKNK2     | 3.11 | 1.62 NM_199054.2    | Homo sapiens MAP kinase interacting serine/threonine kinase 2 (MKNK2), 2, mRNA.           |
| RIOK3     | 3.11 | 1.64 NM_003831.2    | Homo sapiens RIO kinase 3 (yeast) (RIOK3), 1, mRNA.                                       |
| CTSL1     | 3.11 | 1.5 NM_001912.3     | Homo sapiens cathepsin L1 (CTSL1), 1, mRNA.                                               |
| VPS18     | 3.12 | 1.65 NM_020857.2    | Homo sapiens vacuolar protein sorting 18 homolog (S. cerevisiae) (VPS18), mRNA.           |
| HIST1H2BD | 3.12 | 1.7 NM_138720.1     | Homo sapiens histone cluster 1, H2bd (HIST1H2BD), 2, mRNA.                                |
| KRT16     | 3.12 | 1.71 NM_005557.2    | Homo sapiens keratin 16 (focal non-epidermolytic palmoplantar keratoderma) (KRT16), mRNA. |
| MN1       | 3.12 | 1.68 NM_002430.2    | Homo sapiens meningioma (disrupted in balanced translocation) 1 (MN1), mRNA.              |
| C20orf30  | 3.12 | 1.6 NM_001009923.1  | Homo sapiens chromosome 20 open reading frame 30 (C20orf30), 1, mRNA.                     |
| PXMP2     | 3.12 | 1.6 NM_018663.1     | Homo sapiens peroxisomal membrane protein 2, 22kDa (PXMP2), mRNA.                         |
| LOC650517 | 3.12 | 1.71 XR_019109.1    | PREDICTED: Homo sapiens hypothetical LOC650517 (LOC650517), mRNA.                         |
| JUP       | 3.14 | 1.7 NM_021991.1     | Homo sapiens junction plakoglobin (JUP), 2, mRNA.                                         |
| PISD      | 3.15 | 1.61 NM_014338.3    | Homo sapiens phosphatidylserine decarboxylase (PISD), mRNA.                               |
| GSTM1     | 3.15 | 1.64 NM_000561.2    | Homo sapiens glutathione S-transferase M1 (GSTM1), 1, mRNA.                               |
| KCNK1     | 3.15 | 1.64 NM_002245.2    | Homo sapiens potassium channel, subfamily K, member 1 (KCNK1), mRNA.                      |
| PIP5K1C   | 3.15 | 1.67 NM_012398.1    | Homo sapiens phosphatidylinositol-4-phosphate 5-kinase, type I, gamma (PIP5K1C), mRNA.    |
|           | 3.16 | 1.61 BC036485       | Homo sapiens cDNA clone IMAGE:5261213                                                     |
| NPC1      | 3.17 | 1.6 NM_000271.3     | Homo sapiens Niemann-Pick disease, type C1 (NPC1), mRNA.                                  |
| IL10RB    | 3.18 | 1.7 NM_000628.3     | Homo sapiens interleukin 10 receptor, beta (IL10RB), mRNA.                                |

|           |      |                     |                                                                                                      |
|-----------|------|---------------------|------------------------------------------------------------------------------------------------------|
| SHC1      | 3.19 | 1.55 NM_003029.3    | Homo sapiens SHC (Src homology 2 domain containing) transforming protein 1 (SHC1), 2, mRNA.          |
| KLHL3     | 3.19 | 1.75 NM_017415.1    | Homo sapiens kelch-like 3 (Drosophila) (KLHL3), mRNA.                                                |
| WIPI2     | 3.19 | 1.69 NM_016003.3    | Homo sapiens WD repeat domain, phosphoinositide interacting 2 (WIPI2), 2, mRNA.                      |
| GADD45A   | 3.2  | 1.64 NM_001924.2    | Homo sapiens growth arrest and DNA-damage-inducible, alpha (GADD45A), mRNA.                          |
| CSAG3A    | 3.2  | 1.75 NM_203311.1    | Homo sapiens CSAG family, member 3A (CSAG3A), mRNA.                                                  |
| SLC25A35  | 3.21 | 1.72 NM_201520.1    | Homo sapiens solute carrier family 25, member 35 (SLC25A35), mRNA.                                   |
| ACSS2     | 3.21 | 1.6 NM_001076552.1  | Homo sapiens acyl-CoA synthetase short-chain family member 2 (ACSS2), 2, mRNA.                       |
| KIAA0195  | 3.21 | 1.68 NM_014738.2    | Homo sapiens KIAA0195 (KIAA0195), mRNA.                                                              |
| ZNF362    | 3.21 | 1.66 NM_152493.2    | Homo sapiens zinc finger protein 362 (ZNF362), mRNA.                                                 |
| CXADR     | 3.22 | 1.65 NM_001338.3    | Homo sapiens coxsackie virus and adenovirus receptor (CXADR), mRNA.                                  |
| NNMT      | 3.22 | 1.58 NM_006169.2    | Homo sapiens nicotinamide N-methyltransferase (NNMT), mRNA.                                          |
| TSC22D2   | 3.24 | 1.67 NM_014779.2    | Homo sapiens TSC22 domain family, member 2 (TSC22D2), mRNA.                                          |
| SLC29A3   | 3.25 | 1.75 NM_018344.3    | Homo sapiens solute carrier family 29 (nucleoside transporters), member 3 (SLC29A3), mRNA.           |
| SNORD21   | 3.25 | 1.73 NR_000006.8    | Homo sapiens small nucleolar RNA, C/D box 21 (SNORD21) on chromosome 1.                              |
| SERTAD1   | 3.26 | 1.66 NM_013376.3    | Homo sapiens SERTA domain containing 1 (SERTAD1), mRNA.                                              |
| TOM1      | 3.26 | 1.68 NM_005488.1    | Homo sapiens target of myb1 (chicken) (TOM1), mRNA.                                                  |
| UBE2F     | 3.27 | 1.61 NM_080678.1    | Homo sapiens ubiquitin-conjugating enzyme E2F (putative) (UBE2F), mRNA.                              |
| GRB7      | 3.27 | 1.81 NM_005310.2    | Homo sapiens growth factor receptor-bound protein 7 (GRB7), 1, mRNA.                                 |
| LOC149134 | 3.27 | 1.81 NM_207326.1    | Homo sapiens hypothetical protein LOC149134 (LOC149134), mRNA.                                       |
| SLC25A16  | 3.28 | 1.76 NM_152707.2    | Homo sapiens solute carrier family 25 (mitochondrial carrier; Graves disease autoantigen), member 16 |
| CYB5B     | 3.29 | 1.56 NM_030579.2    | Homo sapiens cytochrome b5 type B (outer mitochondrial membrane) (CYB5B), mRNA.                      |
| ITGA2     | 3.29 | 1.71 NM_002203.3    | Homo sapiens integrin, alpha 2 (CD49B, alpha 2 subunit of VLA-2 receptor) (ITGA2), mRNA.             |
| D2HGDH    | 3.29 | 1.72 NM_152783.3    | Homo sapiens D-2-hydroxyglutarate dehydrogenase (D2HGDH), mRNA.                                      |
|           | 3.29 | 1.8 BX090408        | BX090408 Soares fetal liver spleen 1NFLS Homo sapiens cDNA clone IMAGp998E08415 ; mRNA sequence      |
| P4HA2     | 3.3  | 1.69 NM_001017974.1 | Homo sapiens procollagen-proline, 2-oxoglutarate 4-dioxygenase (proline 4-hydroxylase)               |
| LOC338758 | 3.31 | 1.78 XM_931359.2    | PREDICTED: Homo sapiens hypothetical protein LOC338758 (LOC338758), mRNA.                            |
| PGBD3     | 3.31 | 1.73 NM_170753.1    | Homo sapiens piggyBac transposable element derived 3 (PGBD3), mRNA.                                  |
| AXL       | 3.32 | 1.72 NM_021913.2    | Homo sapiens AXL receptor tyrosine kinase (AXL), 1, mRNA.                                            |
| C10orf97  | 3.32 | 1.67 NM_024948.2    | Homo sapiens chromosome 10 open reading frame 97 (C10orf97), mRNA.                                   |
| BCL2L1    | 3.34 | 1.64 NM_138578.1    | Homo sapiens BCL2-like 1 (BCL2L1), 1, mRNA.                                                          |
| PCDH7     | 3.34 | 1.83 NM_032456.1    | Homo sapiens protocadherin 7 (PCDH7), b, mRNA.                                                       |
| CRELD1    | 3.34 | 1.69 NM_001031717.2 | Homo sapiens cysteine-rich with EGF-like domains 1 (CRELD1), 1, mRNA.                                |
| NUAK1     | 3.35 | 1.75 NM_014840.2    | Homo sapiens NUAK family, SNF1-like kinase, 1 (NUAK1), mRNA.                                         |
| IGF1R     | 3.36 | 1.72 NM_000875.2    | Homo sapiens insulin-like growth factor 1 receptor (IGF1R), mRNA.                                    |
| ELL2      | 3.36 | 1.69 NM_012081.4    | Homo sapiens elongation factor, RNA polymerase II, 2 (ELL2), mRNA.                                   |
| AKAP13    | 3.36 | 1.67 NM_007200.3    | Homo sapiens A kinase (PRKA) anchor protein 13 (AKAP13), 2, mRNA.                                    |
| CORO1B    | 3.36 | 1.78 NM_020441.2    | Homo sapiens coronin, actin binding protein, 1B (CORO1B), 1, mRNA.                                   |
| PANX2     | 3.36 | 1.76 NM_052839.2    | Homo sapiens pannexin 2 (PANX2), mRNA.                                                               |
| TMC7      | 3.36 | 1.81 NM_024847.2    | Homo sapiens transmembrane channel-like 7 (TMC7), mRNA.                                              |
| ODZ3      | 3.36 | 1.7 NM_001080477.1  | Homo sapiens odz, odd Oz/ten-m homolog 3 (Drosophila) (ODZ3), mRNA.                                  |
| TNFRSF25  | 3.37 | 1.81 NM_148973.1    | Homo sapiens tumor necrosis factor receptor superfamily, member 25 (TNFRSF25), 10, mRNA.             |
| FOLR1     | 3.38 | 1.55 NM_016724.1    | Homo sapiens folate receptor 1 (adult) (FOLR1), 7, mRNA.                                             |
| PAQR6     | 3.39 | 1.82 NM_198406.1    | Homo sapiens progesterin and adipoQ receptor family member VI (PAQR6), 2, mRNA.                      |
| PSEN2     | 3.4  | 1.7 NM_000447.1     | Homo sapiens presenilin 2 (Alzheimer disease 4) (PSEN2), 1, mRNA.                                    |
| CD59      | 3.4  | 1.76 NM_000611.4    | Homo sapiens CD59 molecule, complement regulatory protein (CD59), 2, mRNA.                           |
| ANKRA2    | 3.4  | 1.81 NM_023039.2    | Homo sapiens ankyrin repeat, family A (RFXANK-like), 2 (ANKRA2), mRNA.                               |
| ZNF329    | 3.4  | 1.79 NM_024620.3    | Homo sapiens zinc finger protein 329 (ZNF329), mRNA.                                                 |
| TAX1BP3   | 3.41 | 1.64 NM_014604.2    | Homo sapiens Tax1 (human T-cell leukemia virus type I) binding protein 3 (TAX1BP3), mRNA.            |
| GLRX      | 3.41 | 1.69 NM_002064.1    | Homo sapiens glutaredoxin (thioltransferase) (GLRX), mRNA.                                           |



|             |      |                     |                                                                                                                |
|-------------|------|---------------------|----------------------------------------------------------------------------------------------------------------|
| TMEM189-UBE | 3.42 | 1.75 NM_199203.1    | Homo sapiens TMEM189-UBE2V1 (TMEM189-UBE2V1), 1, mRNA.                                                         |
| GATA2       | 3.42 | 1.72 NM_032638.3    | Homo sapiens GATA binding protein 2 (GATA2), mRNA.                                                             |
| CDC2L2      | 3.42 | 1.78 NM_033531.1    | Homo sapiens cell division cycle 2-like 2 (PITSLRE proteins) (CDC2L2), 5, mRNA.                                |
| PHF15       | 3.43 | 1.71 NM_015288.4    | Homo sapiens PHD finger protein 15 (PHF15), mRNA.                                                              |
| IL6         | 3.43 | 1.8 NM_000600.1     | Homo sapiens interleukin 6 (interferon, beta 2) (IL6), mRNA.                                                   |
| TLE3        | 3.44 | 1.75 NM_005078.1    | Homo sapiens transducin-like enhancer of split 3 (E(sp)1 homolog, Drosophila) (TLE3), mRNA.                    |
| VAT1        | 3.45 | 1.73 NM_006373.3    | Homo sapiens vesicle amine transport protein 1 homolog (T. californica) (VAT1), mRNA.                          |
| FBXO32      | 3.46 | 1.85 NM_148177.1    | Homo sapiens F-box protein 32 (FBXO32), 2, mRNA.                                                               |
| EIF4EBP2    | 3.46 | 1.76 NM_004096.3    | Homo sapiens eukaryotic translation initiation factor 4E binding protein 2 (EIF4EBP2), mRNA.                   |
| SLC22A4     | 3.46 | 1.81 NM_003059.2    | Homo sapiens solute carrier family 22 (organic cation/ergothioneine transporter), member 4 (SLC22A4), mRNA.    |
| UNC13D      | 3.46 | 1.83 NM_199242.2    | Homo sapiens unc-13 homolog D (C. elegans) (UNC13D), mRNA.                                                     |
|             | 3.46 | 1.83 XM_059047      | PREDICTED: Homo sapiens hypothetical LOC126435 (LOC126435), mRNA                                               |
| OAS1        | 3.47 | 1.76 NM_001032409.1 | Homo sapiens 2',5'-oligoadenylate synthetase 1, 40/46kDa (OAS1), 3, mRNA.                                      |
| ABHD8       | 3.47 | 1.72 NM_024527.4    | Homo sapiens abhydrolase domain containing 8 (ABHD8), mRNA.                                                    |
| HEY1        | 3.48 | 1.72 NM_001040708.1 | Homo sapiens hairy/enhancer-of-split related with YRPW motif 1 (HEY1), 2, mRNA.                                |
| SULT1A4     | 3.48 | 1.84 NM_001017391.1 | Homo sapiens sulfotransferase family, cytosolic, 1A, phenol-preferring, member 4 (SULT1A4), 3, mRNA.           |
| AOF2        | 3.49 | 1.65 NM_015013.2    | Homo sapiens amine oxidase (flavin containing) domain 2 (AOF2), 2, mRNA.                                       |
| CALCOCO1    | 3.5  | 1.84 NM_020898.1    | Homo sapiens calcium binding and coiled-coil domain 1 (CALCOCO1), mRNA.                                        |
| MMP7        | 3.5  | 1.86 NM_002423.3    | Homo sapiens matrix metalloproteinase 7 (matrilysin, uterine) (MMP7), mRNA.                                    |
| PVRL2       | 3.5  | 1.75 NM_002856.2    | Homo sapiens poliovirus receptor-related 2 (herpesvirus entry mediator B) (PVRL2), alpha, mRNA.                |
| KRT17       | 3.5  | 1.67 NM_000422.1    | Homo sapiens keratin 17 (KRT17), mRNA.                                                                         |
| LOC653297   | 3.5  | 1.82 XM_926730.1    | PREDICTED: Homo sapiens similar to CSAG family, member 2 (LOC653297), mRNA.                                    |
| ARID3B      | 3.5  | 1.78 NM_006465.2    | Homo sapiens AT rich interactive domain 3B (BRIGHT-like) (ARID3B), mRNA.                                       |
| C20orf24    | 3.5  | 1.58 NM_018840.2    | Homo sapiens chromosome 20 open reading frame 24 (C20orf24), 1, mRNA.                                          |
| TSC22D3     | 3.51 | 1.75 NM_198057.2    | Homo sapiens TSC22 domain family, member 3 (TSC22D3), 1, mRNA.                                                 |
| SMPDL3A     | 3.51 | 1.82 NM_006714.2    | Homo sapiens sphingomyelin phosphodiesterase, acid-like 3A (SMPDL3A), mRNA.                                    |
| EMP1        | 3.52 | 1.74 NM_001423.1    | Homo sapiens epithelial membrane protein 1 (EMP1), mRNA.                                                       |
| CYB5D2      | 3.52 | 1.79 NM_144611.2    | Homo sapiens cytochrome b5 domain containing 2 (CYB5D2), mRNA.                                                 |
| LOC646723   | 3.52 | 1.5 XR_017241.1     | PREDICTED: Homo sapiens similar to Keratin, type I cytoskeletal 18 (Cytokeratin-18) (CK-18) (Keratin-18) (K18) |
| HOXC13      | 3.54 | 1.72 NM_017410.2    | Homo sapiens homeobox C13 (HOXC13), mRNA.                                                                      |
| EPAS1       | 3.55 | 1.66 NM_001430.3    | Homo sapiens endothelial PAS domain protein 1 (EPAS1), mRNA.                                                   |
| OKL38       | 3.56 | 1.84 NM_013370.2    | Homo sapiens pregnancy-induced growth inhibitor (OKL38), 1, mRNA.                                              |
| IER3        | 3.56 | 1.65 NM_003897.3    | Homo sapiens immediate early response 3 (IER3), mRNA.                                                          |
| LOH11CR2A   | 3.56 | 1.84 NM_198315.2    | Homo sapiens loss of heterozygosity, 11, chromosomal region 2, gene A (LOH11CR2A), 2, mRNA.                    |
| PSEN2       | 3.57 | 1.74 NM_012486.1    | Homo sapiens presenilin 2 (Alzheimer disease 4) (PSEN2), 2, mRNA.                                              |
| PSCA        | 3.57 | 1.88 NM_005672.3    | Homo sapiens prostate stem cell antigen (PSCA), mRNA.                                                          |
| PLEKHG1     | 3.58 | 1.91 NM_001029884.1 | Homo sapiens pleckstrin homology domain containing, family G (with RhoGef domain) member 1 (PLEKHG1), mRNA.    |
| CRIP1       | 3.58 | 1.63 NM_001311.3    | Homo sapiens cysteine-rich protein 1 (intestinal) (CRIP1), mRNA.                                               |
| MME         | 3.59 | 1.86 NM_000902.3    | Homo sapiens membrane metallo-endopeptidase (MME), 1, mRNA.                                                    |
| DUSP10      | 3.61 | 1.91 NM_144729.1    | Homo sapiens dual specificity phosphatase 10 (DUSP10), 3, mRNA.                                                |
| C16orf7     | 3.61 | 1.86 NM_004913.2    | Homo sapiens chromosome 16 open reading frame 7 (C16orf7), mRNA.                                               |
| AZI1        | 3.62 | 1.78 NM_014984.2    | Homo sapiens 5-azacytidine induced 1 (AZI1), 1, mRNA.                                                          |
| RHOC        | 3.63 | 1.64 NM_175744.4    | Homo sapiens ras homolog gene family, member C (RHOC), 1, mRNA.                                                |
| TBX3        | 3.63 | 1.79 NM_005996.3    | Homo sapiens T-box 3 (ulnar mammary syndrome) (TBX3), 1, mRNA.                                                 |
| S100P       | 3.63 | 1.63 NM_005980.2    | Homo sapiens S100 calcium binding protein P (S100P), mRNA.                                                     |
| RARA        | 3.64 | 1.78 NM_000964.2    | Homo sapiens retinoic acid receptor, alpha (RARA), 1, mRNA.                                                    |
| S100A11     | 3.64 | 1.66 NM_005620.1    | Homo sapiens S100 calcium binding protein A11 (S100A11), mRNA.                                                 |
| ATF3        | 3.65 | 1.78 NM_001040619.1 | Homo sapiens activating transcription factor 3 (ATF3), 4, mRNA.                                                |
| PLCL2       | 3.65 | 1.71 NM_015184.3    | Homo sapiens phospholipase C-like 2 (PLCL2), mRNA.                                                             |

|           |      |                     |                                                                                                                |
|-----------|------|---------------------|----------------------------------------------------------------------------------------------------------------|
| TMEM45A   | 3.65 | 1.77 NM_018004.1    | Homo sapiens transmembrane protein 45A (TMEM45A), mRNA.                                                        |
| SPOCK2    | 3.66 | 1.89 NM_014767.1    | Homo sapiens spar/osteonectin, cwcv and kazal-like domains proteoglycan (testican) 2 (SPOCK2), mRNA.           |
| C1QTNF1   | 3.67 | 1.87 NM_198594.1    | Homo sapiens C1q and tumor necrosis factor related protein 1 (C1QTNF1), mRNA.                                  |
| CLIC3     | 3.67 | 1.9 NM_004669.2     | Homo sapiens chloride intracellular channel 3 (CLIC3), mRNA.                                                   |
| PI4KAP2   | 3.68 | 1.82 NM_199345.3    | Homo sapiens phosphatidylinositol 4-kinase, catalytic, alpha polypeptide pseudogene 2 (PI4KAP2), mRNA.         |
| PPIC      | 3.69 | 1.76 NM_000943.4    | Homo sapiens peptidylprolyl isomerase C (cyclophilin C) (PPIC), mRNA.                                          |
| SERINC2   | 3.69 | 1.88 NM_178865.3    | Homo sapiens serine incorporator 2 (SERINC2), mRNA.                                                            |
| MAP3K8    | 3.7  | 1.83 NM_005204.2    | Homo sapiens mitogen-activated protein kinase kinase 8 (MAP3K8), mRNA.                                         |
| STS       | 3.7  | 1.93 NM_000351.4    | Homo sapiens steroid sulfatase (microsomal), isozyme S (STS), mRNA.                                            |
| ITM2C     | 3.7  | 1.85 NM_001012516.1 | Homo sapiens integral membrane protein 2C (ITM2C), 2, mRNA.                                                    |
| RDHE2     | 3.71 | 1.94 NM_138969.2    | Homo sapiens epidermal retinal dehydrogenase 2 (RDHE2), mRNA.                                                  |
| SLC38A10  | 3.71 | 1.88 NM_001037984.1 | Homo sapiens solute carrier family 38, member 10 (SLC38A10), 1, mRNA.                                          |
| SCPEP1    | 3.72 | 1.78 NM_021626.1    | Homo sapiens serine carboxypeptidase 1 (SCPEP1), mRNA.                                                         |
| SRGAP3    | 3.73 | 1.93 NM_001033117.1 | Homo sapiens SLIT-ROBO Rho GTPase activating protein 3 (SRGAP3), 2, mRNA.                                      |
| GPRC5C    | 3.73 | 1.9 NM_022036.2     | Homo sapiens G protein-coupled receptor, family C, group 5, member C (GPRC5C), 1, mRNA.                        |
| HES2      | 3.74 | 1.91 NM_019089.3    | Homo sapiens hairy and enhancer of split 2 (Drosophila) (HES2), mRNA.                                          |
| CITED2    | 3.74 | 1.75 NM_006079.3    | Homo sapiens Cbp/p300-interacting transactivator, with Glu/Asp-rich carboxy-terminal domain, 2 (CITED2), mRNA. |
| KCNK1     | 3.74 | 1.83 NM_002245.2    | Homo sapiens potassium channel, subfamily K, member 1 (KCNK1), mRNA.                                           |
| DUSP10    | 3.75 | 1.93 NM_144729.1    | Homo sapiens dual specificity phosphatase 10 (DUSP10), 3, mRNA.                                                |
| CORO1B    | 3.75 | 1.77 NM_001018070.1 | Homo sapiens coronin, actin binding protein, 1B (CORO1B), 2, mRNA.                                             |
| F11R      | 3.76 | 1.92 NM_016946.3    | Homo sapiens F11 receptor (F11R), 1, mRNA.                                                                     |
| PCTK3     | 3.77 | 1.87 NM_212503.1    | Homo sapiens PCTAIRE protein kinase 3 (PCTK3), 1, mRNA.                                                        |
|           | 3.78 | 1.87 AL157484       | Homo sapiens mRNA; cDNA DKFZp762M127 (from clone DKFZp762M127)                                                 |
| MB        | 3.8  | 1.85 NM_005368.2    | Homo sapiens myoglobin (MB), 1, mRNA.                                                                          |
| P4HA2     | 3.8  | 1.8 NM_001017973.1  | Homo sapiens procollagen-proline, 2-oxoglutarate 4-dioxygenase (proline 4-hydroxylase)                         |
|           | 3.8  | 1.89 BU838786       | AGENCOURT_8210259 NIH_MGC_112 Homo sapiens cDNA clone IMAGE:6258046 5, mRNA sequence                           |
| FOS       | 3.81 | 1.91 NM_005252.2    | Homo sapiens v-fos FBJ murine osteosarcoma viral oncogene homolog (FOS), mRNA.                                 |
| PAK6      | 3.82 | 1.97 NM_020168.3    | Homo sapiens p21(CDKN1A)-activated kinase 6 (PAK6), mRNA.                                                      |
| NPSR1     | 3.83 | 1.91 NM_207172.1    | Homo sapiens neuropeptide S receptor 1 (NPSR1), 1, mRNA.                                                       |
| MUC16     | 3.83 | 1.89 NM_024690.2    | Homo sapiens mucin 16, cell surface associated (MUC16), mRNA.                                                  |
| SMAD7     | 3.84 | 1.9 NM_005904.2     | Homo sapiens SMAD family member 7 (SMAD7), mRNA.                                                               |
| NPTX1     | 3.84 | 1.69 NM_002522.2    | Homo sapiens neuronal pentraxin I (NPTX1), mRNA.                                                               |
| SDC4      | 3.84 | 1.9 NM_002999.2     | Homo sapiens syndecan 4 (SDC4), mRNA.                                                                          |
| CDA       | 3.85 | 1.81 NM_001785.2    | Homo sapiens cytidine deaminase (CDA), mRNA.                                                                   |
| ACTG2     | 3.85 | 1.96 NM_001615.3    | Homo sapiens actin, gamma 2, smooth muscle, enteric (ACTG2), mRNA.                                             |
| C10orf65  | 3.86 | 1.94 NM_138413.2    | Homo sapiens chromosome 10 open reading frame 65 (C10orf65), mRNA.                                             |
| YPEL5     | 3.87 | 1.83 NM_016061.1    | Homo sapiens yippee-like 5 (Drosophila) (YPEL5), mRNA.                                                         |
| TRIML2    | 3.87 | 1.88 NM_173553.1    | Homo sapiens tripartite motif family-like 2 (TRIML2), mRNA.                                                    |
| DKK1      | 3.88 | 1.81 NM_012242.2    | Homo sapiens dickkopf homolog 1 (Xenopus laevis) (DKK1), mRNA.                                                 |
| TMEM2     | 3.88 | 1.81 NM_013390.1    | Homo sapiens transmembrane protein 2 (TMEM2), mRNA.                                                            |
| NUAK1     | 3.9  | 1.85 NM_014840.2    | Homo sapiens NUAK family, SNF1-like kinase, 1 (NUAK1), mRNA.                                                   |
| KCNK3     | 3.9  | 1.99 NM_002246.1    | Homo sapiens potassium channel, subfamily K, member 3 (KCNK3), mRNA.                                           |
| GALIG     | 3.9  | 2.01 NM_194327.1    | Homo sapiens galectin-3 internal gene (GALIG), mRNA.                                                           |
| TERF1     | 3.92 | 1.98 NM_017489.1    | Homo sapiens telomeric repeat binding factor (NIMA-interacting) 1 (TERF1), 1, mRNA.                            |
| HIST1H2BD | 3.94 | 1.91 NM_138720.1    | Homo sapiens histone cluster 1, H2bd (HIST1H2BD), 2, mRNA.                                                     |
| UBE2H     | 3.96 | 1.98 NM_003344.2    | Homo sapiens ubiquitin-conjugating enzyme E2H (UBC8 homolog, yeast) (UBE2H), 1, mRNA.                          |
| GABARAPL1 | 3.98 | 1.8 NM_031412.2     | Homo sapiens GABA(A) receptor-associated protein like 1 (GABARAPL1), mRNA.                                     |
| PPIC      | 3.98 | 1.84 NM_000943.4    | Homo sapiens peptidylprolyl isomerase C (cyclophilin C) (PPIC), mRNA.                                          |
| ULK1      | 3.98 | 1.79 NM_003565.1    | Homo sapiens unc-51-like kinase 1 (C. elegans) (ULK1), mRNA.                                                   |

|           |      |                     |                                                                                                              |
|-----------|------|---------------------|--------------------------------------------------------------------------------------------------------------|
| C5AR1     | 3.99 | 1.96 NM_001736.3    | Homo sapiens complement component 5a receptor 1 (C5AR1), mRNA.                                               |
| FOLR1     | 3.99 | 1.69 NM_016731.2    | Homo sapiens folate receptor 1 (adult) (FOLR1), 8, mRNA.                                                     |
| SPRY4     | 3.99 | 2.02 NM_030964.2    | Homo sapiens sprouty homolog 4 (Drosophila) (SPRY4), mRNA.                                                   |
| MSRB2     | 4    | 1.82 NM_012228.2    | Homo sapiens methionine sulfoxide reductase B2 (MSRB2), mRNA.                                                |
| MGC24039  | 4    | 1.85 NM_144973.3    | Homo sapiens hypothetical protein MGC24039 (MGC24039), mRNA.                                                 |
| RAB17     | 4.01 | 1.81 NM_022449.1    | Homo sapiens RAB17, member RAS oncogene family (RAB17), mRNA.                                                |
| CLDN7     | 4.01 | 1.93 NM_001307.3    | Homo sapiens claudin 7 (CLDN7), mRNA.                                                                        |
| PHLDB2    | 4.01 | 1.91 NM_145753.1    | Homo sapiens pleckstrin homology-like domain, family B, member 2 (PHLDB2), mRNA.                             |
| ULK1      | 4.02 | 1.81 NM_003565.1    | Homo sapiens unc-51-like kinase 1 (C. elegans) (ULK1), mRNA.                                                 |
| HSPA5     | 4.02 | 1.94 NM_005347.2    | Homo sapiens heat shock 70kDa protein 5 (glucose-regulated protein, 78kDa) (HSPA5), mRNA.                    |
| PHLDB2    | 4.02 | 1.94 NM_145753.1    | Homo sapiens pleckstrin homology-like domain, family B, member 2 (PHLDB2), mRNA.                             |
| C12orf5   | 4.04 | 1.84 NM_020375.2    | Homo sapiens chromosome 12 open reading frame 5 (C12orf5), mRNA.                                             |
| SNORD15B  | 4.05 | 1.96 NR_000025.1    | Homo sapiens small nucleolar RNA, C/D box 15B (SNORD15B) on chromosome 11.                                   |
| C1orf162  | 4.05 | 2.03 NM_174896.2    | Homo sapiens chromosome 1 open reading frame 162 (C1orf162), mRNA.                                           |
| C17orf60  | 4.06 | 2.1 NM_001085423.1  | Homo sapiens chromosome 17 open reading frame 60 (C17orf60), mRNA.                                           |
| SERTAD4   | 4.06 | 1.89 NM_019605.2    | Homo sapiens SERTA domain containing 4 (SERTAD4), mRNA.                                                      |
| PRDM1     | 4.07 | 1.92 NM_001198.2    | Homo sapiens PR domain containing 1, with ZNF domain (PRDM1), 1, mRNA.                                       |
| TUBB2A    | 4.08 | 1.96 NM_001069.2    | Homo sapiens tubulin, beta 2A (TUBB2A), mRNA.                                                                |
| F11R      | 4.08 | 1.9 NM_144504.1     | Homo sapiens F11 receptor (F11R), 5, mRNA.                                                                   |
| ISG20L1   | 4.08 | 1.84 NM_022767.2    | Homo sapiens interferon stimulated exonuclease gene 20kDa-like 1 (ISG20L1), mRNA.                            |
| HIST1H1C  | 4.09 | 1.9 NM_005319.3     | Homo sapiens histone cluster 1, H1c (HIST1H1C), mRNA.                                                        |
| GSN       | 4.09 | 2 NM_198252.2       | Homo sapiens gelsolin (amyloidosis, Finnish type) (GSN), 2, mRNA.                                            |
| C20orf30  | 4.09 | 1.86 NM_001009924.1 | Homo sapiens chromosome 20 open reading frame 30 (C20orf30), 2, mRNA.                                        |
| UBE2H     | 4.1  | 1.95 NM_003344.2    | Homo sapiens ubiquitin-conjugating enzyme E2H (UBC8 homolog, yeast) (UBE2H), 1, mRNA.                        |
| CDKN1C    | 4.1  | 1.97 NM_000076.1    | Homo sapiens cyclin-dependent kinase inhibitor 1C (p57, Kip2) (CDKN1C), mRNA.                                |
| TSC22D3   | 4.12 | 1.92 NM_004089.3    | Homo sapiens TSC22 domain family, member 3 (TSC22D3), 2, mRNA.                                               |
| CARHSP1   | 4.13 | 1.82 NM_001042476.1 | Homo sapiens calcium regulated heat stable protein 1, 24kDa (CARHSP1), 2, mRNA.                              |
| NUAK2     | 4.13 | 1.96 NM_030952.1    | Homo sapiens NUAK family, SNF1-like kinase, 2 (NUAK2), mRNA.                                                 |
| ITM2C     | 4.13 | 1.96 NM_001012516.1 | Homo sapiens integral membrane protein 2C (ITM2C), 2, mRNA.                                                  |
| CSRP1     | 4.16 | 1.78 NM_004078.1    | Homo sapiens cysteine and glycine-rich protein 1 (CSRP1), mRNA.                                              |
| LOC644743 | 4.16 | 1.75 XR_016703.1    | PREDICTED: Homo sapiens hypothetical LOC644743 (LOC644743), mRNA.                                            |
| SEMA3B    | 4.17 | 2.03 NM_001005914.1 | Homo sapiens sema domain, immunoglobulin domain (Ig), short basic domain, secreted                           |
| MX1       | 4.19 | 2.04 NM_002462.2    | Homo sapiens myxovirus (influenza virus) resistance 1, interferon-inducible protein p78 (mouse) (MX1), mRNA. |
| MFGE8     | 4.19 | 1.99 NM_005928.1    | Homo sapiens milk fat globule-EGF factor 8 protein (MFGE8), mRNA.                                            |
| SLC22A4   | 4.2  | 2.01 NM_003059.2    | Homo sapiens solute carrier family 22 (organic cation/ergothioneine transporter), member 4 (SLC22A4), mRNA.  |
| FLJ40504  | 4.2  | 1.76 NM_173624.1    | Homo sapiens hypothetical protein FLJ40504 (FLJ40504), mRNA.                                                 |
| SAMD9     | 4.22 | 2 NM_017654.2       | Homo sapiens sterile alpha motif domain containing 9 (SAMD9), mRNA.                                          |
| SYTL2     | 4.24 | 2.1 NM_206928.1     | Homo sapiens synaptotagmin-like 2 (SYTL2), d, mRNA.                                                          |
| RPS27L    | 4.24 | 1.76 NM_015920.3    | Homo sapiens ribosomal protein S27-like (RPS27L), mRNA.                                                      |
| MN1       | 4.24 | 1.98 NM_002430.2    | Homo sapiens meningioma (disrupted in balanced translocation) 1 (MN1), mRNA.                                 |
| SESN1     | 4.25 | 1.97 NM_014454.1    | Homo sapiens sestrin 1 (SESN1), mRNA.                                                                        |
| SH3TC1    | 4.26 | 2.06 NM_018986.3    | Homo sapiens SH3 domain and tetratricopeptide repeats 1 (SH3TC1), mRNA.                                      |
| PRRG2     | 4.26 | 2.1 NM_000951.1     | Homo sapiens proline rich Gla (G-carboxyglutamic acid) 2 (PRRG2), mRNA.                                      |
| ROR1      | 4.27 | 2.05 NM_005012.2    | Homo sapiens receptor tyrosine kinase-like orphan receptor 1 (ROR1), 1, mRNA.                                |
| OSBPL7    | 4.27 | 2.14 NM_145798.2    | Homo sapiens oxysterol binding protein-like 7 (OSBPL7), 1, mRNA.                                             |
| VASN      | 4.27 | 1.91 NM_138440.2    | Homo sapiens vasorin (VASN), mRNA.                                                                           |
| C10orf54  | 4.27 | 2.07 NM_022153.1    | Homo sapiens chromosome 10 open reading frame 54 (C10orf54), mRNA.                                           |
| OLFML1    | 4.29 | 2.01 NM_198474.2    | Homo sapiens olfactomedin-like 1 (OLFML1), mRNA.                                                             |
| PMEPA1    | 4.3  | 2.04 NM_199169.1    | Homo sapiens prostate transmembrane protein, androgen induced 1 (PMEPA1), 2, mRNA.                           |

|           |      |                     |                                                                                                                |
|-----------|------|---------------------|----------------------------------------------------------------------------------------------------------------|
| TGIF1     | 4.31 | 1.86 NM_170695.2    | Homo sapiens TGFB-induced factor homeobox 1 (TGIF1), 1, mRNA.                                                  |
| DSC2      | 4.32 | 2.11 NM_024422.2    | Homo sapiens desmocollin 2 (DSC2), Dsc2a, mRNA.                                                                |
| PAQR6     | 4.32 | 2.09 NM_024897.2    | Homo sapiens progesterin and adipoQ receptor family member VI (PAQR6), 1, mRNA.                                |
| NEU1      | 4.33 | 1.96 NM_000434.2    | Homo sapiens sialidase 1 (lysosomal sialidase) (NEU1), mRNA.                                                   |
| IDH1      | 4.33 | 1.85 NM_005896.2    | Homo sapiens isocitrate dehydrogenase 1 (NADP+), soluble (IDH1), mRNA.                                         |
| S100A10   | 4.33 | 1.79 NM_002966.2    | Homo sapiens S100 calcium binding protein A10 (S100A10), mRNA.                                                 |
| SAMD11    | 4.34 | 2.11 NM_152486.2    | Homo sapiens sterile alpha motif domain containing 11 (SAMD11), mRNA.                                          |
| TGIF1     | 4.35 | 1.91 NM_170695.2    | Homo sapiens TGFB-induced factor homeobox 1 (TGIF1), 1, mRNA.                                                  |
| GNG11     | 4.35 | 1.89 NM_004126.3    | Homo sapiens guanine nucleotide binding protein (G protein), gamma 11 (GNG11), mRNA.                           |
| PPEF1     | 4.37 | 2.15 NM_152224.1    | Homo sapiens protein phosphatase, EF-hand calcium binding domain 1 (PPEF1), 1b, mRNA.                          |
| OBFC1     | 4.37 | 2.05 NM_024928.3    | Homo sapiens oligonucleotide/oligosaccharide-binding fold containing 1 (OBFC1), mRNA.                          |
| PTS       | 4.39 | 1.91 NM_000317.1    | Homo sapiens 6-pyruvoyltetrahydropterin synthase (PTS), mRNA.                                                  |
| FLJ12529  | 4.39 | 2.09 NM_024811.2    | Homo sapiens pre-mRNA cleavage factor I, 59 kDa subunit (FLJ12529), mRNA.                                      |
| C14orf4   | 4.41 | 2.06 NM_024496.2    | Homo sapiens chromosome 14 open reading frame 4 (C14orf4), mRNA.                                               |
| LOC644760 | 4.43 | 2.06 XM_932354.1    | PREDICTED: Homo sapiens hypothetical protein LOC644760 (LOC644760), mRNA.                                      |
| FGFBP1    | 4.48 | 2.12 NM_005130.3    | Homo sapiens fibroblast growth factor binding protein 1 (FGFBP1), mRNA.                                        |
| LOC387841 | 4.48 | 2.07 XM_932678.1    | PREDICTED: Homo sapiens similar to ribosomal protein L13a, 2 (LOC387841), mRNA.                                |
| DNAJB2    | 4.51 | 2.05 NM_006736.5    | Homo sapiens DnaJ (Hsp40) homolog, subfamily B, member 2 (DNAJB2), 2, mRNA.                                    |
| GLCC11    | 4.52 | 2.25 NM_138426.2    | Homo sapiens glucocorticoid induced transcript 1 (GLCC11), mRNA.                                               |
| COL1A1    | 4.53 | 2.11 NM_000088.3    | Homo sapiens collagen, type I, alpha 1 (COL1A1), mRNA.                                                         |
| C1QTNF6   | 4.54 | 2.13 NM_182486.1    | Homo sapiens C1q and tumor necrosis factor related protein 6 (C1QTNF6), 2, mRNA.                               |
| ATP2B4    | 4.54 | 2.04 NM_001001396.1 | Homo sapiens ATPase, Ca <sup>++</sup> transporting, plasma membrane 4 (ATP2B4), 1, mRNA.                       |
| DUSP2     | 4.54 | 2.06 NM_004418.2    | Homo sapiens dual specificity phosphatase 2 (DUSP2), mRNA.                                                     |
| LAMB2     | 4.55 | 2.06 NM_002292.3    | Homo sapiens laminin, beta 2 (laminin S) (LAMB2), mRNA.                                                        |
| ID3       | 4.55 | 1.87 NM_002167.2    | Homo sapiens inhibitor of DNA binding 3, dominant negative helix-loop-helix protein (ID3), mRNA.               |
| RARRES3   | 4.56 | 2.09 NM_004585.3    | Homo sapiens retinoic acid receptor responder (tazarotene induced) 3 (RARRES3), mRNA.                          |
| ATP1B1    | 4.58 | 1.9 NM_001001787.1  | Homo sapiens ATPase, Na <sup>+</sup> /K <sup>+</sup> transporting, beta 1 polypeptide (ATP1B1), 2, mRNA.       |
| FOLR1     | 4.58 | 2.23 NM_016725.1    | Homo sapiens folate receptor 1 (adult) (FOLR1), 1, mRNA.                                                       |
| GPR126    | 4.6  | 2.16 NM_001032394.1 | Homo sapiens G protein-coupled receptor 126 (GPR126), a2, mRNA.                                                |
| TUBB2A    | 4.6  | 2.1 NM_001069.2     | Homo sapiens tubulin, beta 2A (TUBB2A), mRNA.                                                                  |
| FAM80B    | 4.61 | 2.15 NM_020734.1    | Homo sapiens family with sequence similarity 80, member B (FAM80B), mRNA.                                      |
| ATP1B1    | 4.63 | 2.03 NM_001677.3    | Homo sapiens ATPase, Na <sup>+</sup> /K <sup>+</sup> transporting, beta 1 polypeptide (ATP1B1), 1, mRNA.       |
| BTG2      | 4.64 | 2.1 NM_006763.2     | Homo sapiens BTG family, member 2 (BTG2), mRNA.                                                                |
| ATP2B4    | 4.65 | 2.07 NM_001684.3    | Homo sapiens ATPase, Ca <sup>++</sup> transporting, plasma membrane 4 (ATP2B4), 2, mRNA.                       |
| TIMP3     | 4.66 | 2.18 NM_000362.4    | Homo sapiens TIMP metalloproteinase inhibitor 3 (Sorsby fundus dystrophy, pseudoinflammatory) (TIMP3), mRNA.   |
| NCOR2     | 4.66 | 1.94 NM_006312.3    | Homo sapiens nuclear receptor co-repressor 2 (NCOR2), 1, mRNA.                                                 |
| SEMA3B    | 4.66 | 2.09 NM_001005914.1 | Homo sapiens sema domain, immunoglobulin domain (Ig), short basic domain, secreted, (semaphorin) 3B (SEMA3B)   |
| MYO1A     | 4.68 | 2.23 NM_005379.2    | Homo sapiens myosin IA (MYO1A), mRNA.                                                                          |
| HERC5     | 4.69 | 1.99 NM_016323.2    | Homo sapiens hect domain and RLD 5 (HERC5), mRNA.                                                              |
| CYGB      | 4.69 | 2.28 NM_134268.3    | Homo sapiens cytoglobin (CYGB), mRNA.                                                                          |
| INHA      | 4.72 | 2.21 NM_002191.2    | Homo sapiens inhibin, alpha (INHA), mRNA.                                                                      |
| KRT8      | 4.72 | 1.98 NM_002273.2    | Homo sapiens keratin 8 (KRT8), mRNA.                                                                           |
| GRB7      | 4.75 | 2.22 NM_001030002.1 | Homo sapiens growth factor receptor-bound protein 7 (GRB7), 2, mRNA.                                           |
| DUSP5     | 4.76 | 2.08 NM_004419.3    | Homo sapiens dual specificity phosphatase 5 (DUSP5), mRNA.                                                     |
| C17orf91  | 4.76 | 2.21 NM_001001870.1 | Homo sapiens chromosome 17 open reading frame 91 (C17orf91), 2, mRNA.                                          |
| PSG4      | 4.78 | 2.26 NM_002780.3    | Homo sapiens pregnancy specific beta-1-glycoprotein 4 (PSG4), 1, mRNA.                                         |
| TP53INP2  | 4.78 | 2.2 NM_021202.1     | Homo sapiens tumor protein p53 inducible nuclear protein 2 (TP53INP2), mRNA.                                   |
| LOC340598 | 4.79 | 2.14 XM_926996.1    | PREDICTED: Homo sapiens similar to Keratin, type I cytoskeletal 18 (Cytokeratin-18) (CK-18) (Keratin-18) (K18) |
| KLF4      | 4.81 | 2.13 NM_004235.3    | Homo sapiens Kruppel-like factor 4 (gut) (KLF4), mRNA.                                                         |

|           |      |                     |                                                                                                                    |
|-----------|------|---------------------|--------------------------------------------------------------------------------------------------------------------|
| SCARA5    | 4.81 | 2.22 NM_173833.4    | Homo sapiens scavenger receptor class A, member 5 (putative) (SCARA5), mRNA.                                       |
| PLAT      | 4.82 | 2.3 NM_000930.2     | Homo sapiens plasminogen activator, tissue (PLAT), 1, mRNA.                                                        |
| ANKRD38   | 4.87 | 2.18 NM_181712.3    | Homo sapiens ankyrin repeat domain 38 (ANKRD38), mRNA.                                                             |
| HES2      | 4.89 | 2.27 NM_019089.3    | Homo sapiens hairy and enhancer of split 2 (Drosophila) (HES2), mRNA.                                              |
| ALPP      | 4.89 | 1.96 NM_001632.3    | Homo sapiens alkaline phosphatase, placental (Regan isozyme) (ALPP), mRNA.                                         |
| PHLDA1    | 4.89 | 2.16 NM_007350.3    | Homo sapiens pleckstrin homology-like domain, family A, member 1 (PHLDA1), mRNA.                                   |
| CYR61     | 4.9  | 2.11 NM_001554.3    | Homo sapiens cysteine-rich, angiogenic inducer, 61 (CYR61), mRNA.                                                  |
| NKD2      | 4.91 | 2.21 NM_033120.2    | Homo sapiens naked cuticle homolog 2 (Drosophila) (NKD2), mRNA.                                                    |
| PMEPA1    | 4.92 | 2.23 NM_199169.1    | Homo sapiens prostate transmembrane protein, androgen induced 1 (PMEPA1), 2, mRNA.                                 |
| DHX58     | 4.92 | 2.37 NM_024119.2    | Homo sapiens DEXH (Asp-Glu-X-His) box polypeptide 58 (DHX58), mRNA.                                                |
| ATP1B1    | 4.95 | 2.06 NM_001677.3    | Homo sapiens ATPase, Na+/K+ transporting, beta 1 polypeptide (ATP1B1), 1, mRNA.                                    |
| S100A10   | 4.95 | 2.02 NM_002966.1    | Homo sapiens S100 calcium binding protein A10 (annexin II ligand, calpactin I, polypeptide (p11)) (S100A10), mRNA. |
| LOC646463 | 4.95 | 2.28 XM_001130106.1 | PREDICTED: Homo sapiens similar to Ubiquitin-conjugating enzyme E2 H (Ubiquitin-protein ligase H).                 |
| DUSP16    | 4.96 | 2.17 NM_030640.1    | Homo sapiens dual specificity phosphatase 16 (DUSP16), mRNA.                                                       |
| DSC2      | 4.97 | 2.22 NM_004949.2    | Homo sapiens desmocollin 2 (DSC2), Dsc2b, mRNA.                                                                    |
| CYP2S1    | 4.97 | 2.33 NM_030622.6    | Homo sapiens cytochrome P450, family 2, subfamily S, polypeptide 1 (CYP2S1), mRNA.                                 |
| PDGFRB    | 5.02 | 2.35 NM_002609.3    | Homo sapiens platelet-derived growth factor receptor, beta polypeptide (PDGFRB), mRNA.                             |
| CEBPA     | 5.03 | 2.14 NM_004364.2    | Homo sapiens CCAAT/enhancer binding protein (C/EBP), alpha (CEBPA), mRNA.                                          |
| HIST1H2BK | 5.06 | 1.99 NM_080593.1    | Homo sapiens histone cluster 1, H2bk (HIST1H2BK), mRNA.                                                            |
| COL4A6    | 5.07 | 2.34 NM_001847.2    | Homo sapiens collagen, type IV, alpha 6 (COL4A6), A, mRNA.                                                         |
| PRSS8     | 5.07 | 2.22 NM_002773.3    | Homo sapiens protease, serine, 8 (PRSS8), mRNA.                                                                    |
| ACOT11    | 5.1  | 2.36 NM_147161.2    | Homo sapiens acyl-CoA thioesterase 11 (ACOT11), 2, mRNA.                                                           |
| MYO7A     | 5.1  | 2.42 NM_000260.2    | Homo sapiens myosin VIIA (MYO7A), mRNA.                                                                            |
| KIAA1539  | 5.1  | 2.33 NM_025182.2    | Homo sapiens KIAA1539 (KIAA1539), mRNA.                                                                            |
| AKR1B1    | 5.12 | 2.02 NM_001628.2    | Homo sapiens aldo-keto reductase family 1, member B1 (aldose reductase) (AKR1B1), mRNA.                            |
| TSPAN10   | 5.15 | 2.34 NM_031945.3    | Homo sapiens tetraspanin 10 (TSPAN10), mRNA.                                                                       |
| LGALS3    | 5.15 | 2.2 NM_002306.1     | Homo sapiens lectin, galactoside-binding, soluble, 3 (galectin 3) (LGALS3), mRNA.                                  |
| PSG3      | 5.21 | 2.46 NM_021016.3    | Homo sapiens pregnancy specific beta-1-glycoprotein 3 (PSG3), mRNA.                                                |
| LOC647954 | 5.24 | 2.23 XR_018676.1    | PREDICTED: Homo sapiens misc_RNA (LOC647954), miscRNA.                                                             |
| GPRC5C    | 5.25 | 2.31 NM_018653.3    | Homo sapiens G protein-coupled receptor, family C, group 5, member C (GPRC5C), 2, mRNA.                            |
| GPRC5A    | 5.25 | 2.31 NM_003979.3    | Homo sapiens G protein-coupled receptor, family C, group 5, member A (GPRC5A), mRNA.                               |
| NFKBIZ    | 5.27 | 2.47 NM_001005474.1 | Homo sapiens nuclear factor of kappa light polypeptide gene enhancer in B-cells inhibitor, zeta (NFKBIZ), 2, mRNA. |
| SLC7A7    | 5.28 | 2.51 NM_003982.2    | Homo sapiens solute carrier family 7 (cationic amino acid transporter, y+ system), member 7 (SLC7A7), mRNA.        |
| NCOR2     | 5.3  | 2.2 NM_001077261.1  | Homo sapiens nuclear receptor co-repressor 2 (NCOR2), 2, mRNA.                                                     |
| GPR37     | 5.31 | 2.26 NM_005302.2    | Homo sapiens G protein-coupled receptor 37 (endothelin receptor type B-like) (GPR37), mRNA.                        |
| LOC643431 | 5.31 | 2.28 XM_928128.1    | PREDICTED: Homo sapiens similar to Keratin, type II cytoskeletal 8 (Cytokeratin-8) (CK-8) (Keraton-8) (K8)         |
| H19       | 5.33 | 2.32 NR_002196.1    | Homo sapiens H19, imprinted maternally expressed transcript (H19) on chromosome 11.                                |
| KRT13     | 5.34 | 2.46 NM_002274.3    | Homo sapiens keratin 13 (KRT13), 2, mRNA.                                                                          |
| PLAU      | 5.34 | 2.51 NM_002658.2    | Homo sapiens plasminogen activator, urokinase (PLAU), mRNA.                                                        |
| RPS6KC1   | 5.35 | 2.36 NM_012424.2    | Homo sapiens ribosomal protein S6 kinase, 52kDa, polypeptide 1 (RPS6KC1), mRNA.                                    |
| COL17A1   | 5.36 | 2.51 NM_000494.3    | Homo sapiens collagen, type XVII, alpha 1 (COL17A1), mRNA.                                                         |
| PAPPA     | 5.37 | 2.37 NM_002581.3    | Homo sapiens pregnancy-associated plasma protein A, pappalysin 1 (PAPPA), mRNA.                                    |
| PLEC1     | 5.37 | 2.32 NM_000445.2    | Homo sapiens plectin 1, intermediate filament binding protein 500kDa (PLEC1), 1, mRNA.                             |
| ABCC3     | 5.41 | 2.37 NM_003786.2    | Homo sapiens ATP-binding cassette, sub-family C (CFTR/MRP), member 3 (ABCC3), mRNA.                                |
| PHLDA3    | 5.41 | 2.36 NM_012396.3    | Homo sapiens pleckstrin homology-like domain, family A, member 3 (PHLDA3), mRNA.                                   |
| APOBEC3H  | 5.43 | 2.6 NM_181773.2     | Homo sapiens apolipoprotein B mRNA editing enzyme, catalytic polypeptide-like 3H (APOBEC3H), mRNA.                 |
| HIST1H2BK | 5.44 | 2.3 NM_080593.1     | Homo sapiens histone cluster 1, H2bk (HIST1H2BK), mRNA.                                                            |
| ID1       | 5.45 | 2.43 NM_181353.1    | Homo sapiens inhibitor of DNA binding 1, dominant negative helix-loop-helix protein (ID1), 2, mRNA.                |
| LOC645553 | 5.46 | 2.39 XM_932965.2    | PREDICTED: Homo sapiens hypothetical LOC645553 (LOC645553), mRNA.                                                  |

|              |      |                     |                                                                                                                   |
|--------------|------|---------------------|-------------------------------------------------------------------------------------------------------------------|
| HSPA2        | 5.47 | 2.5 NM_021979.2     | Homo sapiens heat shock 70kDa protein 2 (HSPA2), mRNA.                                                            |
| SLC11A2      | 5.48 | 2.23 NM_000617.1    | Homo sapiens solute carrier family 11 (proton-coupled divalent metal ion transporters), member 2 (SLC11A2), mRNA. |
| RHBDF1       | 5.48 | 2.42 NM_022450.2    | Homo sapiens rhomboid 5 homolog 1 (Drosophila) (RHBDF1), mRNA.                                                    |
| SRPX2        | 5.49 | 2.57 NM_014467.2    | Homo sapiens sushi-repeat-containing protein, X-linked 2 (SRPX2), mRNA.                                           |
| DKFZp761P04: | 5.5  | 2.48 XM_291277.4    | PREDICTED: Homo sapiens hypothetical protein DKFZp761P0423 (DKFZp761P0423), mRNA.                                 |
| DUSP1        | 5.53 | 2.25 NM_004417.2    | Homo sapiens dual specificity phosphatase 1 (DUSP1), mRNA.                                                        |
| FAM134B      | 5.55 | 2.52 NM_001034850.1 | Homo sapiens family with sequence similarity 134, member B (FAM134B), 1, mRNA.                                    |
| LOC91461     | 5.62 | 2.47 NM_138370.1    | Homo sapiens hypothetical protein BC007901 (LOC91461), mRNA.                                                      |
| PCDH7        | 5.62 | 2.44 NM_002589.2    | Homo sapiens protocadherin 7 (PCDH7), a, mRNA.                                                                    |
| OPN3         | 5.64 | 2.52 NM_014322.2    | Homo sapiens opsin 3 (OPN3), mRNA.                                                                                |
| CYP11A1      | 5.66 | 2.52 NM_000781.2    | Homo sapiens cytochrome P450, family 11, subfamily A, polypeptide 1 (CYP11A1), 1, mRNA.                           |
| PDZK1        | 5.68 | 2.65 NM_002614.3    | Homo sapiens PDZ domain containing 1 (PDZK1), mRNA.                                                               |
| NFS1         | 5.69 | 2.54 NM_021100.3    | Homo sapiens NFS1 nitrogen fixation 1 homolog (S. cerevisiae) (NFS1), mRNA.                                       |
| IGFBP3       | 5.75 | 2.59 NM_001013398.1 | Homo sapiens insulin-like growth factor binding protein 3 (IGFBP3), 1, mRNA.                                      |
| YPEL3        | 5.77 | 2.62 NM_031477.4    | Homo sapiens yippee-like 3 (Drosophila) (YPEL3), mRNA.                                                            |
| SLC22A18     | 5.78 | 2.56 NM_002555.3    | Homo sapiens solute carrier family 22 (organic cation transporter), member 18 (SLC22A18), 1, mRNA.                |
| RPS6KC1      | 5.78 | 2.55 NM_012424.2    | Homo sapiens ribosomal protein S6 kinase, 52kDa, polypeptide 1 (RPS6KC1), mRNA.                                   |
| SYTL2        | 5.83 | 2.62 NM_206929.1    | Homo sapiens synaptotagmin-like 2 (SYTL2), e, mRNA.                                                               |
| HMOX1        | 5.83 | 2.51 NM_002133.1    | Homo sapiens heme oxygenase (decycling) 1 (HMOX1), mRNA.                                                          |
| C1QTNF6      | 5.84 | 2.46 NM_031910.3    | Homo sapiens C1q and tumor necrosis factor related protein 6 (C1QTNF6), 1, mRNA.                                  |
| FSTL3        | 5.86 | 2.35 NM_005860.2    | Homo sapiens follistatin-like 3 (secreted glycoprotein) (FSTL3), mRNA.                                            |
| CDKN1A       | 5.89 | 2.8 NM_078467.1     | Homo sapiens cyclin-dependent kinase inhibitor 1A (p21, Cip1) (CDKN1A), 2, mRNA.                                  |
| CASP9        | 5.9  | 2.76 NM_001229.2    | Homo sapiens caspase 9, apoptosis-related cysteine peptidase (CASP9), alpha, mRNA.                                |
| CSAG3A       | 5.97 | 2.69 NM_203311.1    | Homo sapiens CSAG family, member 3A (CSAG3A), mRNA.                                                               |
| IGFBP3       | 6.01 | 2.71 NM_000598.4    | Homo sapiens insulin-like growth factor binding protein 3 (IGFBP3), 2, mRNA.                                      |
| GDPD5        | 6.01 | 2.63 NM_030792.5    | Homo sapiens glycerophosphodiester phosphodiesterase domain containing 5 (GDPD5), mRNA.                           |
| LAMB3        | 6.02 | 2.57 NM_000228.2    | Homo sapiens laminin, beta 3 (LAMB3), 1, mRNA.                                                                    |
| AKR1B10      | 6.08 | 2.83 NM_020299.3    | Homo sapiens aldo-keto reductase family 1, member B10 (aldose reductase) (AKR1B10), mRNA.                         |
| ZBED1        | 6.09 | 2.41 NM_004729.3    | Homo sapiens zinc finger, BED-type containing 1 (ZBED1), mRNA.                                                    |
| OPN3         | 6.11 | 2.84 NM_014322.2    | Homo sapiens opsin 3 (OPN3), mRNA.                                                                                |
| SLC16A4      | 6.16 | 2.69 NM_004696.1    | Homo sapiens solute carrier family 16, member 4 (monocarboxylic acid transporter 5) (SLC16A4), mRNA.              |
| HIC2         | 6.17 | 2.7 NM_015094.2     | Homo sapiens hypermethylated in cancer 2 (HIC2), mRNA.                                                            |
| FBXO2        | 6.21 | 2.78 NM_012168.4    | Homo sapiens F-box protein 2 (FBXO2), mRNA.                                                                       |
| C21orf125    | 6.21 | 2.93 NM_194309.1    | Homo sapiens chromosome 21 open reading frame 125 (C21orf125), mRNA.                                              |
| COL5A1       | 6.22 | 2.65 NM_000093.3    | Homo sapiens collagen, type V, alpha 1 (COL5A1), mRNA.                                                            |
| CRYAB        | 6.25 | 2.95 NM_001885.1    | Homo sapiens crystallin, alpha B (CRYAB), mRNA.                                                                   |
| HSPA2        | 6.28 | 2.84 NM_021979.3    | Homo sapiens heat shock 70kDa protein 2 (HSPA2), mRNA.                                                            |
| SAT1         | 6.29 | 2.65 NM_002970.1    | Homo sapiens spermidine/spermine N1-acetyltransferase 1 (SAT1), mRNA.                                             |
| SLC12A3      | 6.3  | 2.83 NM_000339.1    | Homo sapiens solute carrier family 12 (sodium/chloride transporters), member 3 (SLC12A3), mRNA.                   |
| CASP9        | 6.3  | 2.77 NM_032996.1    | Homo sapiens caspase 9, apoptosis-related cysteine peptidase (CASP9), beta, mRNA.                                 |
| SLC2A3       | 6.32 | 2.56 NM_006931.1    | Homo sapiens solute carrier family 2 (facilitated glucose transporter), member 3 (SLC2A3), mRNA.                  |
| LYPD3        | 6.4  | 2.87 NM_014400.2    | Homo sapiens LY6/PLAUR domain containing 3 (LYPD3), mRNA.                                                         |
| KRT7         | 6.41 | 2.62 NM_005556.3    | Homo sapiens keratin 7 (KRT7), mRNA.                                                                              |
| FLJ45248     | 6.44 | 2.96 NM_207505.1    | Homo sapiens FLJ45248 protein (FLJ45248), mRNA.                                                                   |
| CDKN1A       | 6.47 | 2.66 NM_000389.2    | Homo sapiens cyclin-dependent kinase inhibitor 1A (p21, Cip1) (CDKN1A), 1, mRNA.                                  |
| ID1          | 6.48 | 2.63 NM_181353.1    | Homo sapiens inhibitor of DNA binding 1, dominant negative helix-loop-helix protein (ID1), 2, mRNA.               |
| ZNF467       | 6.49 | 3.07 NM_207336.1    | Homo sapiens zinc finger protein 467 (ZNF467), mRNA.                                                              |
| KIAA1324     | 6.53 | 2.91 NM_020775.2    | Homo sapiens KIAA1324 (KIAA1324), mRNA.                                                                           |
| SNAI2        | 6.58 | 3.03 NM_003068.3    | Homo sapiens snail homolog 2 (Drosophila) (SNAI2), mRNA.                                                          |

|           |       |                     |                                                                                                                |
|-----------|-------|---------------------|----------------------------------------------------------------------------------------------------------------|
| DDX60     | 6.59  | 2.96 NM_017631.4    | Homo sapiens DEAD (Asp-Glu-Ala-Asp) box polypeptide 60 (DDX60), mRNA.                                          |
| C8orf4    | 6.62  | 2.93 NM_020130.3    | Homo sapiens chromosome 8 open reading frame 4 (C8orf4), mRNA.                                                 |
| SLC16A4   | 6.78  | 3.09 NM_004696.1    | Homo sapiens solute carrier family 16, member 4 (monocarboxylic acid transporter 5) (SLC16A4), mRNA.           |
| IL7R      | 6.79  | 3.16 XM_937367.1    | PREDICTED: Homo sapiens interleukin 7 receptor (IL7R), mRNA.                                                   |
| SNAI2     | 6.8   | 2.99 NM_003068.3    | Homo sapiens snail homolog 2 (Drosophila) (SNAI2), mRNA.                                                       |
| S100A9    | 6.8   | 3.39 NM_002965.2    | Homo sapiens S100 calcium binding protein A9 (calgranulin B) (S100A9), mRNA.                                   |
| C15orf48  | 6.99  | 3.32 NM_032413.2    | Homo sapiens chromosome 15 open reading frame 48 (C15orf48), 2, mRNA.                                          |
| ITGA5     | 7.16  | 3.12 NM_002205.2    | Homo sapiens integrin, alpha 5 (fibronectin receptor, alpha polypeptide) (ITGA5), mRNA.                        |
| SLC6A12   | 7.2   | 3.46 NM_003044.2    | Homo sapiens solute carrier family 6 (neurotransmitter transporter, betaine/GABA), member 12 (SLC6A12), mRNA.  |
| CENTA1    | 7.31  | 3.33 NM_006869.1    | Homo sapiens centaurin, alpha 1 (CENTA1), mRNA.                                                                |
| GSTM2     | 7.31  | 3.43 NM_000848.2    | Homo sapiens glutathione S-transferase M2 (muscle) (GSTM2), mRNA.                                              |
| STRA6     | 7.37  | 3.45 NM_022369.2    | Homo sapiens stimulated by retinoic acid gene 6 homolog (mouse) (STRA6), mRNA.                                 |
| CDH5      | 7.55  | 3.38 NM_001795.2    | Homo sapiens cadherin 5, type 2, VE-cadherin (vascular epithelium) (CDH5), mRNA.                               |
| GLDC      | 7.58  | 3.62 NM_000170.2    | Homo sapiens glycine dehydrogenase (decarboxylating) (GLDC), mRNA.                                             |
| BMP2      | 7.59  | 3.19 NM_001200.2    | Homo sapiens bone morphogenetic protein 2 (BMP2), mRNA.                                                        |
| S100A8    | 7.85  | 3.96 NM_002964.3    | Homo sapiens S100 calcium binding protein A8 (S100A8), mRNA.                                                   |
| TAC3      | 7.86  | 3.79 NM_013251.2    | Homo sapiens tachykinin 3 (neuromedin K, neurokinin beta) (TAC3), 2, mRNA.                                     |
| ISG20     | 8     | 3.53 NM_002201.4    | Homo sapiens interferon stimulated exonuclease gene 20kDa (ISG20), mRNA.                                       |
| SPINK4    | 8.22  | 3.65 NM_014471.1    | Homo sapiens serine peptidase inhibitor, Kazal type 4 (SPINK4), mRNA.                                          |
| ID2       | 8.25  | 3.7 NM_002166.4     | Homo sapiens inhibitor of DNA binding 2, dominant negative helix-loop-helix protein (ID2), mRNA.               |
| VAMP5     | 8.32  | 3.77 NM_006634.2    | Homo sapiens vesicle-associated membrane protein 5 (myobrevin) (VAMP5), mRNA.                                  |
| TP53INP1  | 8.44  | 4.13 NM_033285.2    | Homo sapiens tumor protein p53 inducible nuclear protein 1 (TP53INP1), mRNA.                                   |
| CSF1R     | 8.45  | 4 NM_005211.2       | Homo sapiens colony stimulating factor 1 receptor, formerly McDonough feline sarcoma viral (v-fms)             |
| TP53INP1  | 8.49  | 4.07 NM_033285.2    | Homo sapiens tumor protein p53 inducible nuclear protein 1 (TP53INP1), mRNA.                                   |
| GDF15     | 8.58  | 3.73 NM_004864.1    | Homo sapiens growth differentiation factor 15 (GDF15), mRNA.                                                   |
| KRT19     | 8.62  | 4.12 NM_002276.3    | Homo sapiens keratin 19 (KRT19), mRNA.                                                                         |
| IFI44     | 8.68  | 3.9 NM_006417.3     | Homo sapiens interferon-induced protein 44 (IFI44), mRNA.                                                      |
| ID2       | 8.87  | 4.2 NM_002166.4     | Homo sapiens inhibitor of DNA binding 2, dominant negative helix-loop-helix protein (ID2), mRNA.               |
| IFIT1     | 9.12  | 4.23 NM_001548.3    | Homo sapiens interferon-induced protein with tetratricopeptide repeats 1 (IFIT1), 2, mRNA.                     |
| LOC400578 | 9.16  | 4.74 XR_017543.1    | PREDICTED: Homo sapiens similar to Keratin, type I cytoskeletal 14 (Cytokeratin-14) (CK-14) (Keratin-14) (K14) |
| ARID3A    | 9.27  | 4.38 NM_005224.2    | Homo sapiens AT rich interactive domain 3A (BRIGHT-like) (ARID3A), mRNA.                                       |
| SERPINE2  | 9.47  | 4.65 NM_006216.2    | Homo sapiens serpin peptidase inhibitor, clade E (nexin, plasminogen activator inhibitor type 1)               |
| IGFL2     | 9.69  | 5.11 NM_001002915.1 | Homo sapiens IGF-like family member 2 (IGFL2), mRNA.                                                           |
| IFIT3     | 9.8   | 4.7 NM_001031683.1  | Homo sapiens interferon-induced protein with tetratricopeptide repeats 3 (IFIT3), mRNA.                        |
| OASL      | 10.29 | 5.26 NM_003733.2    | Homo sapiens 2'-5'-oligoadenylate synthetase-like (OASL), 1, mRNA.                                             |
| SERPINB5  | 10.35 | 5.2 NM_002639.3     | Homo sapiens serpin peptidase inhibitor, clade B (ovalbumin), member 5 (SERPINB5), mRNA.                       |
| CLCA2     | 10.47 | 5.73 NM_006536.4    | Homo sapiens chloride channel, calcium activated, family member 2 (CLCA2), mRNA.                               |
| CTH       | 10.61 | 5.11 NM_153742.3    | Homo sapiens cystathionase (cystathionine gamma-lyase) (CTH), 2, mRNA.                                         |
| CCL5      | 10.79 | 5.47 NM_002985.2    | Homo sapiens chemokine (C-C motif) ligand 5 (CCL5), mRNA.                                                      |
| ACTA2     | 10.88 | 5.72 NM_001613.1    | Homo sapiens actin, alpha 2, smooth muscle, aorta (ACTA2), mRNA.                                               |
| VTN       | 11.1  | 5.96 NM_000638.3    | Homo sapiens vitronectin (VTN), mRNA.                                                                          |
| OASL      | 11.19 | 5.83 NM_198213.1    | Homo sapiens 2'-5'-oligoadenylate synthetase-like (OASL), 2, mRNA.                                             |
| MGC102966 | 11.41 | 6.57 XR_015970.1    | PREDICTED: Homo sapiens similar to Keratin, type I cytoskeletal 16 (Cytokeratin-16) (CK-16) (Keratin-16)       |
| APOD      | 11.62 | 6.77 NM_001647.2    | Homo sapiens apolipoprotein D (APOD), mRNA.                                                                    |
| CYP24A1   | 11.68 | 7.03 NM_000782.3    | Homo sapiens cytochrome P450, family 24, subfamily A, polypeptide 1 (CYP24A1), mRNA.                           |
| CCL26     | 11.72 | 6.96 NM_006072.4    | Homo sapiens chemokine (C-C motif) ligand 26 (CCL26), mRNA.                                                    |
| LOC400578 | 11.73 | 6.98 XR_017543.1    | PREDICTED: Homo sapiens similar to Keratin, type I cytoskeletal 14 (Cytokeratin-14) (CK-14) (Keratin-14) (K14) |
| CTH       | 11.87 | 6.58 NM_153742.3    | Homo sapiens cystathionase (cystathionine gamma-lyase) (CTH), 2, mRNA.                                         |
| IFIT2     | 11.94 | 6.63 NM_001547.4    | Homo sapiens interferon-induced protein with tetratricopeptide repeats 2 (IFIT2), mRNA.                        |

|        |       |                     |                                                                            |
|--------|-------|---------------------|----------------------------------------------------------------------------|
| CCL5   | 12.21 | 7 NM_002985.2       | Homo sapiens chemokine (C-C motif) ligand 5 (CCL5), mRNA.                  |
| CTH    | 12.29 | 7.1 NM_001902.4     | Homo sapiens cystathionase (cystathionine gamma-lyase) (CTH), 1, mRNA.     |
| TAC3   | 13.93 | 9.64 NM_001006667.1 | Homo sapiens tachykinin 3 (neuromedin K, neurokinin beta) (TAC3), 1, mRNA. |
| ISG15  | 14.12 | 9.18 NM_005101.1    | Homo sapiens ISG15 ubiquitin-like modifier (ISG15), mRNA.                  |
| KRT86  | 14.5  | 10.35 NM_002284.3   | Homo sapiens keratin 86 (KRT86), mRNA.                                     |
| KRT81  | 16.03 | 13.74 NM_002281.2   | Homo sapiens keratin 81 (KRT81), mRNA.                                     |
| ALPPL2 | 18.41 | 20.33 NM_031313.1   | Homo sapiens alkaline phosphatase, placental-like 2 (ALPPL2), mRNA.        |

---
