# Supplementary material
Source: PubMed Central journal article supplement (PMC3434494)
Supplement: MCB.00510-12_zmb999109544so3.pdf [file MCB.00510-12_zmb999109544so3.pdf]

| Symbol       | (Zratio)                               | (Fold)                                 | ACCESSION      | Definition                                                           |
|--------------|----------------------------------------|----------------------------------------|----------------|----------------------------------------------------------------------|
|              | biot-miR-519 PD vs<br>biot-Ctrl-miR PD | biot-miR-519 PD vs<br>biot-Ctrl-miR PD |                |                                                                      |
| WDR20        | 14.69                                  | 18.67                                  | NM_181291.1    | WD repeat domain 20 (WDR20)                                          |
| SEC16A       | 14.05                                  | 16.64                                  | NM_014866.1    | SEC16 homolog A ( <i>S. cerevisiae</i> ) (SEC16A)                    |
| RAB32        | 12.81                                  | 14.57                                  | NM_006834.2    | RAB32                                                                |
| C14orf138    | 12.39                                  | 12.34                                  | NM_024558.2    | chromosome 14 open reading frame 138 (C14orf138)                     |
| PIGA         | 11.97                                  | 11.57                                  | NM_020473.2    | phosphatidylinositol glycan anchor biosynthesis                      |
| ORAI1        | 12.4                                   | 11.49                                  | NM_032790.2    | ORAI calcium release-activated calcium modulator 1 (ORAI1)           |
| MBNL1        | 11.71                                  | 11.02                                  | NM_207296.1    | muscleblind-like ( <i>Drosophila</i> ) (MBNL1)                       |
| REPIN1       | 11.42                                  | 10.97                                  | NM_014374.1    | replication initiator 1 (REPIN1)                                     |
| FBXW11       | 11.52                                  | 10.84                                  | NM_033645.2    | F-box and WD repeat domain containing 11 (FBXW11)                    |
| APH1A        | 11.35                                  | 10.31                                  | NM_001077628.1 | anterior pharynx defective 1 homolog A ( <i>C. elegans</i> ) (APH1A) |
| BLCAP        | 11.41                                  | 10.23                                  | NM_006698.2    | bladder cancer associated protein (BLCAP)                            |
| MBNL1        | 11.43                                  | 10.04                                  | NM_207295.1    | muscleblind-like ( <i>Drosophila</i> ) (MBNL1)                       |
| LOC100129668 | 11.65                                  | 10                                     | XM_001713607.1 | PREDICTED: hypothetical protein LOC100129668 (LOC100129668)          |
| KIAA1826     | 11.15                                  | 9.83                                   | NM_032424.1    | KIAA1826 (KIAA1826)                                                  |
| BTG1         | 10.49                                  | 9.76                                   | NM_001731.1    | B-cell translocation gene 1                                          |
| CDCA7        | 10.43                                  | 9.42                                   | NM_031942.4    | cell division cycle associated 7 (CDCA7)                             |
| IRF2BP2      | 10.83                                  | 8.94                                   | NM_182972.2    | interferon regulatory factor 2 binding protein 2 (IRF2BP2)           |
| HSPBL2       | 10.58                                  | 8.75                                   | NR_024392.1    | heat shock 27kDa protein-like 2 pseudogene (HSPBL2)                  |
| WDR82        | 10.57                                  | 8.59                                   | NM_025222.3    | WD repeat domain 82 (WDR82)                                          |
| MAPK6        | 10.19                                  | 8.52                                   | NM_002748.2    | mitogen-activated protein kinase 6 (MAPK6)                           |
| C12orf32     | 10.57                                  | 8.47                                   | NM_031465.2    | chromosome 12 open reading frame 32 (C12orf32)                       |
| SMYD2        | 10.38                                  | 8.47                                   | NM_020197.1    | PREDICTED: SET and MYND domain containing 2 (SMYD2)                  |
| COX10        | 10.53                                  | 8.28                                   | NM_001303.2    | COX10 homolog                                                        |
| PAFAH1B3     | 10.14                                  | 8.19                                   | NM_002573.2    | platelet-activating factor acetylhydrolase                           |
| METRNL       | 10.16                                  | 8.06                                   | XM_941466.2    | PREDICTED: meteorin                                                  |
| LOC653506    | 9.95                                   | 8.05                                   | XM_927769.1    | PREDICTED: similar to meteorin                                       |
| DAD1         | 9.43                                   | 7.88                                   | NM_001344.1    | defender against cell death 1 (DAD1)                                 |
| CDKN1A       | 9.57                                   | 7.82                                   | NM_000389.2    | cyclin-dependent kinase inhibitor 1A (p21)                           |
| UQCRC1       | 9.71                                   | 7.79                                   | NM_003365.2    | ubiquinol-cytochrome c reductase core protein I (UQCRC1)             |
| TUFM         | 9.57                                   | 7.63                                   | NM_003321.3    | Tu translation elongation factor                                     |
| CEP55        | 9.51                                   | 7.5                                    | NM_018131.3    | centrosomal protein 55kDa (CEP55)                                    |
| PDRG1        | 10.03                                  | 7.48                                   | NM_030815.2    | p53 and DNA-damage regulated 1 (PDRG1)                               |
| PON2         | 9.42                                   | 7.46                                   | NM_000305.2    | paraoxonase 2 (PON2)                                                 |
| RBMS1        | 9.58                                   | 7.44                                   | NM_002897.3    | RNA binding motif                                                    |
| SLC25A44     | 9.73                                   | 7.32                                   | NM_014655.1    | solute carrier family 25                                             |
| KLHL8        | 9.92                                   | 7.2                                    | NM_020803.3    | kelch-like 8 ( <i>Drosophila</i> ) (KLHL8)                           |
| APH1A        | 9.82                                   | 7.2                                    | NM_001077628.1 | anterior pharynx defective 1 homolog A ( <i>C. elegans</i> ) (APH1A) |
| C14orf138    | 9.39                                   | 7.09                                   | NM_001040662.1 | chromosome 14 open reading frame 138 (C14orf138)                     |
| PPP1R10      | 9.76                                   | 7.02                                   | NM_002714.2    | protein phosphatase 1                                                |
| PRKAA1       | 9.29                                   | 6.95                                   | NM_206907.3    | protein kinase                                                       |
| IER3IP1      | 9.33                                   | 6.93                                   | NM_016097.3    | immediate early response 3 interacting protein 1 (IER3IP1)           |
| RAB5C        | 9.34                                   | 6.9                                    | NM_201434.1    | RAB5C                                                                |
| LYRM1        | 9.14                                   | 6.85                                   | NM_020424.2    | LYR motif containing 1 (LYRM1)                                       |
| OBFC2A       | 9.39                                   | 6.82                                   | NM_001031716.1 | oligonucleotide/oligosaccharide-binding fold containing 2A (OBFC2A)  |
| LOC145853    | 9.26                                   | 6.73                                   | XM_096885.9    | PREDICTED: hypothetical LOC145853 (LOC145853)                        |

|                     |      |                     |                                                                         |
|---------------------|------|---------------------|-------------------------------------------------------------------------|
| <b>TMEM50B</b>      | 9.2  | 6.72 NM_006134.5    | transmembrane protein 50B (TMEM50B)                                     |
| <b>BRP44L</b>       | 9.22 | 6.65 NM_016098.1    | brain protein 44-like (BRP44L)                                          |
| <b>RALGDS</b>       | 8.82 | 6.5 NM_006266.2     | ral guanine nucleotide dissociation stimulator (RALGDS)                 |
| <b>PHACTR4</b>      | 8.96 | 6.49 NM_001048183.1 | phosphatase and actin regulator 4 (PHACTR4)                             |
| <b>TSKU</b>         | 8.98 | 6.36 NM_015516.3    | tsukushin (TSKU)                                                        |
| <b>CKLF</b>         | 8.62 | 6.33 NM_001040139.1 | chemokine-like factor (CKLF)                                            |
| <b>TXNIP</b>        | 8.34 | 6.29 NM_006472.2    | thioredoxin interacting protein (TXNIP)                                 |
| <b>CD58</b>         | 8.98 | 6.16 NM_001779.1    | CD58 molecule (CD58)                                                    |
| <b>C17orf100</b>    | 9.15 | 6.15 NM_001105520.1 | chromosome 17 open reading frame 100 (C17orf100)                        |
| <b>RAB5B</b>        | 8.62 | 6.11 NM_002868.2    | RAB5B                                                                   |
| <b>ERGIC1</b>       | 9.1  | 6.06 NM_001031711.1 | endoplasmic reticulum-golgi intermediate compartment (ERGIC) 1 (ERGIC1) |
| <b>STX10</b>        | 8.67 | 6.06 NM_003765.1    | syntaxin 10 (STX10)                                                     |
| <b>SLC25A23</b>     | 8.62 | 6.04 NM_024103.2    | solute carrier family 25 (mitochondrial carrier; phosphate carrier)     |
| <b>AKIRIN1</b>      | 8.75 | 5.99 NM_024595.1    | akirin 1 (AKIRIN1)                                                      |
| <b>CAPRIN2</b>      | 8.82 | 5.96 NM_001002259.1 | caprin family member 2 (CAPRIN2)                                        |
| <b>PON2</b>         | 8.47 | 5.96 NM_000305.2    | paraoxonase 2 (PON2)                                                    |
| <b>LRRC61</b>       | 9.07 | 5.95 NM_023942.1    | leucine rich repeat containing 61 (LRRC61)                              |
| <b>CCNG2</b>        | 8.12 | 5.92 NM_004354.1    | cyclin G2 (CCNG2)                                                       |
| <b>CKLF</b>         | 8.12 | 5.92 NM_001040138.1 | chemokine-like factor (CKLF)                                            |
| <b>MTMR4</b>        | 8.96 | 5.9 NM_004687.3     | myotubularin related protein 4 (MTMR4)                                  |
| <b>PIGS</b>         | 8.67 | 5.84 NM_033198.2    | phosphatidylinositol glycan anchor biosynthesis                         |
| <b>SLC2A4RG</b>     | 8.7  | 5.83 NM_020062.3    | SLC2A4 regulator (SLC2A4RG)                                             |
| <b>LDOC1L</b>       | 8.51 | 5.8 NM_032287.2     | leucine zipper                                                          |
| <b>TGFBR2</b>       | 8.13 | 5.8 NM_001024847.1  | transforming growth factor                                              |
| <b>FBXL11</b>       | 8.62 | 5.73 NM_012308.1    | F-box and leucine-rich repeat protein 11 (FBXL11)                       |
| <b>SNX5</b>         | 8.62 | 5.73 NM_014426.2    | sorting nexin 5 (SNX5)                                                  |
| <b>FAM13B</b>       | 8.31 | 5.7 NM_001101800.1  | family with sequence similarity 13                                      |
| <b>IRF2BP2</b>      | 8.27 | 5.6 NM_182972.2     | interferon regulatory factor 2 binding protein 2 (IRF2BP2)              |
| <b>RAB11A</b>       | 8.07 | 5.59 NM_004663.3    | RAB11A                                                                  |
| <b>CDK2AP2</b>      | 8.75 | 5.54 NM_005851.3    | cyclin-dependent kinase 2 associated protein 2 (CDK2AP2)                |
| <b>CDC45L</b>       | 8.45 | 5.53 NM_003504.3    | CDC45 cell division cycle 45-like (S. cerevisiae) (CDC45L)              |
| <b>VPS4B</b>        | 8.2  | 5.53 NM_004869.3    | vacuolar protein sorting 4 homolog B (S. cerevisiae) (VPS4B)            |
| <b>MRRF</b>         | 8.3  | 5.52 NM_199177.1    | mitochondrial ribosome recycling factor (MRRF)                          |
| <b>SLC44A2</b>      | 8.45 | 5.51 NM_020428.2    | solute carrier family 44                                                |
| <b>TTL</b>          | 8.06 | 5.46 NM_153712.4    | tubulin tyrosine ligase (TTL)                                           |
| <b>TES</b>          | 8.31 | 5.45 NM_152829.1    | testis derived transcript (3 LIM domains) (TES)                         |
| <b>EPHX1</b>        | 8.67 | 5.42 NM_000120.2    | epoxide hydrolase 1                                                     |
| <b>PLOD2</b>        | 7.88 | 5.38 NM_000935.2    | procollagen-lysine                                                      |
| <b>HIP2</b>         | 8.12 | 5.35 NM_005339.3    | huntingtin interacting protein 2 (HIP2)                                 |
| <b>COMMD6</b>       | 7.52 | 5.35 NM_203497.2    | COMM domain containing 6 (COMMD6)                                       |
| <b>LOC100131940</b> | 8.18 | 5.33 XR_037582.1    | PREDICTED: misc_RNA (LOC100131940)                                      |
| <b>ARL6IP1</b>      | 7.42 | 5.31 NM_015161.1    | ADP-ribosylation factor-like 6 interacting protein 1 (ARL6IP1)          |
| <b>PECI</b>         | 7.9  | 5.3 NM_006117.2     | peroxisomal D3                                                          |
| <b>STAU1</b>        | 7.85 | 5.27 NM_004602.2    | staufen                                                                 |
| <b>C8orf4</b>       | 7.88 | 5.26 NM_020130.3    | chromosome 8 open reading frame 4 (C8orf4)                              |
| <b>CBFB</b>         | 7.93 | 5.24 NM_001755.2    | core-binding factor                                                     |
| <b>ZCCHC9</b>       | 7.79 | 5.2 NM_032280.1     | zinc finger                                                             |
| <b>NDUFAF3</b>      | 7.13 | 5.14 NM_199069.1    | NADH dehydrogenase (ubiquinone) 1 alpha subcomplex                      |
| <b>ZNF614</b>       | 8.07 | 5.12 NM_025040.2    | zinc finger protein 614 (ZNF614)                                        |

|                     |      |                     |                                                                                                  |
|---------------------|------|---------------------|--------------------------------------------------------------------------------------------------|
| <b>CDC2</b>         | 7.67 | 5.1 NM_001786.2     | cell division cycle 2                                                                            |
| <b>MED6</b>         | 7.85 | 5.09 NM_005466.2    | mediator complex subunit 6 (MED6)                                                                |
| <b>C13orf27</b>     | 7.73 | 5.05 NM_138779.2    | chromosome 13 open reading frame 27 (C13orf27)                                                   |
| <b>TIMP2</b>        | 7.32 | 5.05 NM_003255.4    | PREDICTED: TIMP metalloproteinase inhibitor 2 (TIMP2)                                            |
| <b>LY6E</b>         | 7.57 | 5.03 NM_002346.1    | lymphocyte antigen 6 complex                                                                     |
| <b>TRIB1</b>        | 7.96 | 5.01 NM_025195.2    | tribbles homolog 1 (Drosophila) (TRIB1)                                                          |
| <b>TGFB2</b>        | 7.56 | 5.01 NM_001024847.2 | transforming growth factor                                                                       |
| <b>LDLR</b>         | 7.89 | 4.98 NM_000527.2    | low density lipoprotein receptor (familial hypercholesterolemia) (LDLR)                          |
| <b>TNFRSF10B</b>    | 7.84 | 4.98 NM_003842.3    | tumor necrosis factor receptor superfamily                                                       |
| <b>LOC387820</b>    | 7.22 | 4.98 XR_019393.1    | PREDICTED: similar to DnaJ (Hsp40) homolog                                                       |
| <b>ZNF277</b>       | 7.73 | 4.97 NM_021994.2    | zinc finger protein 277 (ZNF277)                                                                 |
| <b>NR2F2</b>        | 7.72 | 4.97 NM_021005.2    | nuclear receptor subfamily 2                                                                     |
| <b>METRNL</b>       | 8.18 | 4.94 NM_001004431.1 | PREDICTED: meteorin                                                                              |
| <b>ABHD10</b>       | 7.91 | 4.87 NM_018394.1    | abhydrolase domain containing 10 (ABHD10)                                                        |
| <b>DCTPP1</b>       | 7.41 | 4.84 NM_024096.1    | dCTP pyrophosphatase 1 (DCTPP1)                                                                  |
| <b>LOC100132499</b> | 6.96 | 4.84 XM_001725693.1 | PREDICTED: similar to mCG7602 (LOC100132499)                                                     |
| <b>RNF14</b>        | 7.59 | 4.83 NM_183399.1    | ring finger protein 14 (RNF14)                                                                   |
| <b>C17orf63</b>     | 7.63 | 4.82 NM_001077498.1 | chromosome 17 open reading frame 63 (C17orf63)                                                   |
| <b>GALNT11</b>      | 7.7  | 4.8 NM_022087.2     | UDP-N-acetyl-alpha-D-galactosamine:polypeptide N-acetylgalactosaminyltransferase 11 (GalNAc-T11) |
| <b>DPY19L1</b>      | 7.16 | 4.8 NM_015283.1     | dpy-19-like 1 (C. elegans) (DPY19L1)                                                             |
| <b>HNRPUL1</b>      | 7.35 | 4.76 NM_144732.1    | heterogeneous nuclear ribonucleoprotein U-like 1 (HNRPUL1)                                       |
| <b>KBTBD2</b>       | 7.29 | 4.76 NM_015483.1    | kelch repeat and BTB (POZ) domain containing 2 (KBTBD2)                                          |
| <b>EFR3A</b>        | 7.21 | 4.76 NM_015137.3    | EFR3 homolog A (S. cerevisiae) (EFR3A)                                                           |
| <b>CLDN12</b>       | 7.56 | 4.75 NM_012129.2    | claudin 12 (CLDN12)                                                                              |
| <b>MORF4L1</b>      | 6.77 | 4.75 NM_206839.1    | mortality factor 4 like 1 (MORF4L1)                                                              |
| <b>STAU1</b>        | 7.04 | 4.74 NM_017454.2    | staufen                                                                                          |
| <b>CD58</b>         | 7.6  | 4.73 NM_001779.1    | CD58 molecule (CD58)                                                                             |
| <b>STK40</b>        | 7.76 | 4.7 NM_032017.1     | serine/threonine kinase 40 (STK40)                                                               |
| <b>SP3</b>          | 7.35 | 4.69 NM_001017371.3 | Sp3 transcription factor (SP3)                                                                   |
| <b>FAM18B</b>       | 7.26 | 4.69 NM_016078.4    | family with sequence similarity 18                                                               |
| <b>FJX1</b>         | 7.58 | 4.68 NM_014344.2    | four jointed box 1 (Drosophila) (FJX1)                                                           |
| <b>TUBB2C</b>       | 7.25 | 4.68 NM_006088.5    | tubulin                                                                                          |
| <b>LOC100129599</b> | 7.26 | 4.67 XM_001724539.1 | PREDICTED: similar to mCG7602 (LOC100129599)                                                     |
| <b>C5orf28</b>      | 7.52 | 4.62 NM_022483.3    | chromosome 5 open reading frame 28 (C5orf28)                                                     |
| <b>ZBTB4</b>        | 7.44 | 4.61 NM_020899.2    | zinc finger and BTB domain containing 4 (ZBTB4)                                                  |
| <b>FAM127B</b>      | 7.3  | 4.53 NM_001078172.1 | family with sequence similarity 127                                                              |
| <b>LOC654103</b>    | 7.27 | 4.51 XM_939368.1    | PREDICTED: similar to solute carrier family 25                                                   |
| <b>DPYSL2</b>       | 6.84 | 4.46 NM_001386.4    | dihydropyrimidinase-like 2 (DPYSL2)                                                              |
| <b>SRXN1</b>        | 7.1  | 4.44 NM_080725.1    | sulfiredoxin 1 homolog (S. cerevisiae) (SRXN1)                                                   |
| <b>C5orf5</b>       | 7.09 | 4.42 NM_016603.1    | chromosome 5 open reading frame 5 (C5orf5)                                                       |
| <b>PPARG</b>        | 6.93 | 4.41 NM_015869.4    | peroxisome proliferator-activated receptor gamma (PPARG)                                         |
| <b>LOC653778</b>    | 7.32 | 4.4 XM_929667.1     | PREDICTED: similar to solute carrier family 25                                                   |
| <b>PRKAA1</b>       | 7.25 | 4.39 NM_006251.5    | protein kinase                                                                                   |
| <b>HSPB1</b>        | 5.77 | 4.39 NM_001540.2    | heat shock 27kDa protein 1 (HSPB1)                                                               |
| <b>KIAA0494</b>     | 7.07 | 4.37 NM_014774.1    | KIAA0494 (KIAA0494)                                                                              |
| <b>CTXN1</b>        | 6.81 | 4.37 NM_206833.2    | cortexin 1 (CTXN1)                                                                               |
| <b>UBAC2</b>        | 7.23 | 4.34 NM_177967.2    | UBA domain containing 2 (UBAC2)                                                                  |
| <b>POLE4</b>        | 6.5  | 4.33 NM_019896.2    | polymerase (DNA-directed)                                                                        |
| <b>E2F2</b>         | 7.22 | 4.32 NM_004091.2    | E2F transcription factor 2 (E2F2)                                                                |

|                     |      |                     |                                                                                 |
|---------------------|------|---------------------|---------------------------------------------------------------------------------|
| <b>LMBRD1</b>       | 7.12 | 4.3 NM_018368.2     | LMBR1 domain containing 1 (LMBRD1)                                              |
| <b>MAT2B</b>        | 6.62 | 4.3 NM_013283.3     | methionine adenosyltransferase II                                               |
| <b>PLIN2</b>        | 7.21 | 4.29 NM_001122.2    | perilipin 2 (PLIN2)                                                             |
| <b>VPS35</b>        | 6.95 | 4.29 NM_018206.3    | vacuolar protein sorting 35 homolog (S. cerevisiae) (VPS35)                     |
| <b>FOXF2</b>        | 7.3  | 4.28 NM_001452.1    | forkhead box F2 (FOXF2)                                                         |
| <b>PECI</b>         | 7.14 | 4.26 NM_006117.2    | peroxisomal D3                                                                  |
| <b>RNF38</b>        | 6.52 | 4.26 NM_022781.4    | ring finger protein 38 (RNF38)                                                  |
| <b>TMEM55B</b>      | 7.26 | 4.25 NM_144568.1    | transmembrane protein 55B (TMEM55B)                                             |
| <b>LOC205251</b>    | 6.9  | 4.24 XR_017711.1    | PREDICTED: misc_RNA (LOC205251)                                                 |
| <b>BECN1</b>        | 6.75 | 4.24 NM_003766.2    | beclin 1                                                                        |
| <b>IRF1</b>         | 7.4  | 4.23 NM_002198.1    | interferon regulatory factor 1 (IRF1)                                           |
| <b>PID1</b>         | 6.94 | 4.21 NM_017933.3    | phosphotyrosine interaction domain containing 1 (PID1)                          |
| <b>FABP5</b>        | 6.79 | 4.21 NM_001444.1    | fatty acid binding protein 5 (psoriasis-associated) (FABP5)                     |
| <b>DCTPP1</b>       | 6.36 | 4.18 NM_024096.1    | dCTP pyrophosphatase 1 (DCTPP1)                                                 |
| <b>CCNH</b>         | 6.94 | 4.17 NM_001239.2    | cyclin H (CCNH)                                                                 |
| <b>FABP5L2</b>      | 6.55 | 4.17 XM_001134012.2 | PREDICTED: fatty acid binding protein 5-like 2 (FABP5L2)                        |
| <b>USP42</b>        | 7.07 | 4.14 NM_032172.1    | ubiquitin specific peptidase 42 (USP42)                                         |
| <b>ZNF385A</b>      | 7.38 | 4.13 NM_015481.1    | zinc finger protein 385A (ZNF385A)                                              |
| <b>ZNF77</b>        | 7.2  | 4.12 NM_021217.1    | zinc finger protein 77 (ZNF77)                                                  |
| <b>MCTS1</b>        | 6.79 | 4.11 NM_014060.1    | malignant T cell amplified sequence 1 (MCTS1)                                   |
| <b>SP3</b>          | 6.82 | 4.08 NM_001017371.3 | Sp3 transcription factor (SP3)                                                  |
| <b>CLIP4</b>        | 6.67 | 4.07 NM_024692.3    | CAP-GLY domain containing linker protein family                                 |
| <b>H19</b>          | 7.54 | 4.06 NR_002196.1    | H19                                                                             |
| <b>CTSA</b>         | 7.14 | 4.06 NM_000308.2    | cathepsin A (CTSA)                                                              |
| <b>CDC25A</b>       | 6.46 | 4.06 NM_001789.2    | cell division cycle 25 homolog A (S. pombe) (CDC25A)                            |
| <b>LOC100134273</b> | 6.44 | 4.04 XM_001724343.1 | PREDICTED: similar to mCG7602 (LOC100134273)                                    |
| <b>RAB5C</b>        | 6.84 | 4.03 NM_004583.2    | RAB5C                                                                           |
| <b>FOXJ3</b>        | 6.5  | 4.03 NM_014947.3    | forkhead box J3 (FOXJ3)                                                         |
| <b>METRNL</b>       | 6.93 | 4.02 XM_941466.2    | PREDICTED: meteorin                                                             |
| <b>SNRK</b>         | 6.82 | 4.02 NM_017719.3    | SNF related kinase (SNRK)                                                       |
| <b>KLHL8</b>        | 7.06 | 4.01 NM_020803.3    | kelch-like 8 (Drosophila) (KLHL8)                                               |
| <b>MEGF9</b>        | 6.91 | 4 NM_001080497.1    | multiple EGF-like-domains 9 (MEGF9)                                             |
| <b>DUSP3</b>        | 6.19 | 4 NM_004090.2       | dual specificity phosphatase 3 (vaccinia virus phosphatase VH1-related) (DUSP3) |
| <b>STX6</b>         | 6.79 | 3.99 NM_005819.4    | syntaxin 6 (STX6)                                                               |
| <b>FAM175B</b>      | 6.81 | 3.98 NM_032182.3    | family with sequence similarity 175                                             |
| <b>OXA1L</b>        | 6.53 | 3.98 NM_005015.1    | oxidase (cytochrome c) assembly 1-like (OXA1L)                                  |
| <b>HABP4</b>        | 6.91 | 3.97 NM_014282.1    | hyaluronan binding protein 4 (HABP4)                                            |
| <b>ZNFX1</b>        | 6.91 | 3.97 NM_021035.2    | zinc finger                                                                     |
| <b>MPV17</b>        | 6.76 | 3.97 NM_002437.4    | MpV17 mitochondrial inner membrane protein (MPV17)                              |
| <b>FARP1</b>        | 6.64 | 3.97 NM_005766.2    | FERM                                                                            |
| <b>DAZAP2</b>       | 5.93 | 3.96 NM_014764.2    | DAZ associated protein 2 (DAZAP2)                                               |
| <b>CRTC2</b>        | 7.01 | 3.95 NM_181715.1    | CREB regulated transcription coactivator 2 (CRTC2)                              |
| <b>HDHD1A</b>       | 6.69 | 3.94 NM_012080.3    | haloacid dehalogenase-like hydrolase domain containing 1A (HDHD1A)              |
| <b>PLOD2</b>        | 6.64 | 3.93 NM_000935.2    | procollagen-lysine                                                              |
| <b>TIPARP</b>       | 6.35 | 3.93 NM_015508.3    | TCDD-inducible poly(ADP-ribose) polymerase (TIPARP)                             |
| <b>FABP5</b>        | 6.82 | 3.92 NM_001444.1    | fatty acid binding protein 5 (psoriasis-associated) (FABP5)                     |
| <b>FAM102A</b>      | 6.6  | 3.89 NM_001035254.1 | family with sequence similarity 102                                             |
| <b>PTK2</b>         | 6.07 | 3.89 NM_005607.3    | PTK2 protein tyrosine kinase 2 (PTK2)                                           |
| <b>SS18L2</b>       | 5.79 | 3.89 NM_016305.2    | synovial sarcoma translocation gene on chromosome 18-like 2 (SS18L2)            |

|                  |      |                     |                                                                            |
|------------------|------|---------------------|----------------------------------------------------------------------------|
| <b>NRBP2</b>     | 6.78 | 3.88 NM_178564.2    | nuclear receptor binding protein 2 (NRBP2)                                 |
| <b>SLC22A5</b>   | 6.53 | 3.88 NM_003060.2    | solute carrier family 22 (organic cation transporter)                      |
| <b>BIVM</b>      | 6.56 | 3.87 NM_017693.2    | basic                                                                      |
| <b>THG1L</b>     | 6.94 | 3.85 NM_017872.3    | tRNA-histidine guanylyltransferase 1-like ( <i>S. cerevisiae</i> ) (THG1L) |
| <b>MCM6</b>      | 6.13 | 3.84 NM_005915.4    | minichromosome maintenance complex component 6 (MCM6)                      |
| <b>NDUFA2</b>    | 5.76 | 3.84 NM_002488.3    | NADH dehydrogenase (ubiquinone) 1 alpha subcomplex                         |
| <b>CDC42EP4</b>  | 6.13 | 3.83 NM_012121.4    | CDC42 effector protein (Rho GTPase binding) 4 (CDC42EP4)                   |
| <b>VAMP7</b>     | 6.24 | 3.82 NM_005638.3    | Yq12w                                                                      |
| <b>LOC644132</b> | 6.53 | 3.78 XR_017532.2    | PREDICTED: misc_RNA (LOC644132)                                            |
| <b>CSTB</b>      | 5.61 | 3.77 NM_000100.2    | cystatin B (stefin B) (CSTB)                                               |
| <b>ATP6V1C1</b>  | 6.75 | 3.76 NM_001695.4    | ATPase                                                                     |
| <b>POLQ</b>      | 6.42 | 3.76 NM_199420.3    | polymerase (DNA directed)                                                  |
| <b>C6orf62</b>   | 5.94 | 3.75 NM_030939.3    | chromosome 6 open reading frame 62 (C6orf62)                               |
| <b>TNFRSF21</b>  | 5.87 | 3.75 NM_014452.3    | tumor necrosis factor receptor superfamily                                 |
| <b>TMEM138</b>   | 6.54 | 3.74 NM_016464.3    | transmembrane protein 138 (TMEM138)                                        |
| <b>GLCE</b>      | 6.55 | 3.73 NM_015554.1    | glucuronic acid epimerase (GLCE)                                           |
| <b>E2F7</b>      | 6    | 3.72 NM_203394.2    | E2F transcription factor 7 (E2F7)                                          |
| <b>FAM120A</b>   | 5.85 | 3.72 NM_014612.3    | family with sequence similarity 120A (FAM120A)                             |
| <b>PPARG</b>     | 6.35 | 3.71 NM_138712.3    | peroxisome proliferator-activated receptor gamma (PPARG)                   |
| <b>RAB22A</b>    | 6.36 | 3.7 NM_020673.2     | RAB22A                                                                     |
| <b>MRPL21</b>    | 6.23 | 3.7 NM_181514.1     | mitochondrial ribosomal protein L21 (MRPL21)                               |
| <b>SYDE1</b>     | 6.42 | 3.69 NM_033025.4    | synapse defective 1                                                        |
| <b>VAMP3</b>     | 6.06 | 3.68 NM_004781.3    | vesicle-associated membrane protein 3 (cellubrevin) (VAMP3)                |
| <b>SMAD6</b>     | 5.96 | 3.68 NM_005585.3    | SMAD family member 6 (SMAD6)                                               |
| <b>ZNF317</b>    | 6.6  | 3.67 NM_020933.2    | zinc finger protein 317 (ZNF317)                                           |
| <b>FAM102A</b>   | 6.56 | 3.66 NM_001035254.1 | family with sequence similarity 102                                        |
| <b>GADD45B</b>   | 6.22 | 3.66 NM_015675.2    | growth arrest and DNA-damage-inducible                                     |
| <b>USP3</b>      | 6.2  | 3.66 NM_006537.2    | ubiquitin specific peptidase 3 (USP3)                                      |
| <b>SCRN1</b>     | 6.15 | 3.66 NM_014766.3    | secernin 1 (SCRN1)                                                         |
| <b>USP1</b>      | 5.84 | 3.65 NM_001017416.1 | ubiquitin specific peptidase 1 (USP1)                                      |
| <b>ALCAM</b>     | 6.22 | 3.64 NM_001627.2    | activated leukocyte cell adhesion molecule (ALCAM)                         |
| <b>LOC642956</b> | 6.04 | 3.63 XM_938166.3    | PREDICTED: hypothetical LOC642956 (LOC642956)                              |
| <b>PSMG2</b>     | 5.71 | 3.63 NM_020232.3    | proteasome (prosome)                                                       |
| <b>ATPAF1</b>    | 6.07 | 3.62 NM_022745.3    | ATP synthase mitochondrial F1 complex assembly factor 1 (ATPAF1)           |
| <b>ZMYND11</b>   | 5.93 | 3.61 NM_006624.3    | zinc finger                                                                |
| <b>TUBB4Q</b>    | 6.36 | 3.6 NM_020040.3     | tubulin                                                                    |
| <b>HBP1</b>      | 6.29 | 3.6 NM_012257.3     | HMG-box transcription factor 1 (HBP1)                                      |
| <b>TMEM64</b>    | 6.1  | 3.6 NM_001008495.2  | transmembrane protein 64 (TMEM64)                                          |
| <b>DCUN1D4</b>   | 5.97 | 3.59 NM_015115.1    | DCN1                                                                       |
| <b>MRPL21</b>    | 5.9  | 3.57 NM_181515.1    | mitochondrial ribosomal protein L21 (MRPL21)                               |
| <b>ANKIB1</b>    | 5.76 | 3.57 NM_019004.1    | ankyrin repeat and IBR domain containing 1 (ANKIB1)                        |
| <b>FBXW11</b>    | 6.09 | 3.56 NM_033645.2    | F-box and WD repeat domain containing 11 (FBXW11)                          |
| <b>C20orf30</b>  | 5.75 | 3.56 NM_001009924.1 | chromosome 20 open reading frame 30 (C20orf30)                             |
| <b>STRN3</b>     | 6.02 | 3.55 NM_014574.3    | striatin                                                                   |
| <b>HADHB</b>     | 6.42 | 3.54 NM_000183.2    | hydroxyacyl-Coenzyme A dehydrogenase/3-ketoacyl-Coenzyme A thiolase        |
| <b>STX6</b>      | 6.25 | 3.54 NM_005819.4    | syntaxin 6 (STX6)                                                          |
| <b>C5orf32</b>   | 6.04 | 3.54 NM_032412.3    | chromosome 5 open reading frame 32 (C5orf32)                               |
| <b>WEE1</b>      | 5.8  | 3.54 NM_003390.2    | WEE1 homolog ( <i>S. pombe</i> ) (WEE1)                                    |
| <b>RECK</b>      | 6.34 | 3.53 NM_021111.1    | reversion-inducing-cysteine-rich protein with kazal motifs (RECK)          |

|                     |      |                     |                                                                 |
|---------------------|------|---------------------|-----------------------------------------------------------------|
| <b>INO80</b>        | 6.16 | 3.53 NM_017553.1    | INO80 homolog (S. cerevisiae) (INO80)                           |
| <b>PSMF1</b>        | 6.14 | 3.53 NM_178579.1    | proteasome (prosome)                                            |
| <b>MIDN</b>         | 6.32 | 3.52 NM_177401.4    | midnolin (MIDN)                                                 |
| <b>LOC100132535</b> | 6.24 | 3.52 XR_038625.1    | PREDICTED: misc_RNA (LOC100132535)                              |
| <b>MED8</b>         | 6.46 | 3.51 NM_201542.2    | mediator of RNA polymerase II transcription                     |
| <b>OXR1</b>         | 5.93 | 3.51 NM_181354.3    | oxidation resistance 1 (OXR1)                                   |
| <b>DNAJB6</b>       | 5.9  | 3.51 NM_005494.2    | DnaJ (Hsp40) homolog                                            |
| <b>LOC642975</b>    | 5.76 | 3.51 XR_036988.1    | PREDICTED: misc_RNA (LOC642975)                                 |
| <b>TARS</b>         | 5.47 | 3.51 NM_152295.3    | threonyl-tRNA synthetase (TARS)                                 |
| <b>SH2B3</b>        | 6.35 | 3.5 NM_005475.1     | SH2B adaptor protein 3 (SH2B3)                                  |
| <b>IFNAR2</b>       | 6.26 | 3.49 NM_207584.1    | interferon (alpha)                                              |
| <b>SMARCA2</b>      | 5.87 | 3.49 NM_003070.3    | SWI/SNF related                                                 |
| <b>SPATA2</b>       | 6.23 | 3.48 NM_006038.2    | spermatogenesis associated 2 (SPATA2)                           |
| <b>CHN1</b>         | 6.04 | 3.48 NM_001025201.1 | chimerin (chimaerin) 1 (CHN1)                                   |
| <b>EPDR1</b>        | 5.92 | 3.48 NM_017549.3    | ependymin related protein 1 (zebrafish) (EPDR1)                 |
| <b>SPOP</b>         | 5.8  | 3.48 NM_001007230.1 | speckle-type POZ protein (SPOP)                                 |
| <b>FBLN1</b>        | 5.86 | 3.47 NM_006486.2    | fibulin 1 (FBLN1)                                               |
| <b>CXCR4</b>        | 6.05 | 3.46 NM_001008540.1 | chemokine (C-X-C motif) receptor 4 (CXCR4)                      |
| <b>PDCD10</b>       | 5.57 | 3.46 NM_145859.1    | programmed cell death 10 (PDCD10)                               |
| <b>WSB2</b>         | 5.9  | 3.45 NM_018639.3    | WD repeat and SOCS box-containing 2 (WSB2)                      |
| <b>FBRS</b>         | 6.41 | 3.44 NM_001105079.1 | fibrosin (FBRS)                                                 |
| <b>TBC1D2</b>       | 6.18 | 3.43 NM_018421.2    | TBC1 domain family                                              |
| <b>SAC3D1</b>       | 5.77 | 3.42 NM_013299.3    | SAC3 domain containing 1 (SAC3D1)                               |
| <b>MAP3K14</b>      | 6.34 | 3.41 NM_003954.2    | mitogen-activated protein kinase kinase kinase 14 (MAP3K14)     |
| <b>HBP1</b>         | 5.92 | 3.4 NM_012257.3     | HMG-box transcription factor 1 (HBP1)                           |
| <b>C20orf30</b>     | 5.5  | 3.4 NM_001009923.1  | chromosome 20 open reading frame 30 (C20orf30)                  |
| <b>KIAA1737</b>     | 6.08 | 3.39 NM_033426.2    | KIAA1737 (KIAA1737)                                             |
| <b>KCTD20</b>       | 5.81 | 3.39 NM_173562.3    | potassium channel tetramerisation domain containing 20 (KCTD20) |
| <b>CDC2</b>         | 5.59 | 3.38 NM_001786.2    | cell division cycle 2                                           |
| <b>NSMCE2</b>       | 6.09 | 3.36 NM_173685.1    | non-SMC element 2                                               |
| <b>C1orf144</b>     | 5.78 | 3.36 NM_015609.2    | chromosome 1 open reading frame 144 (C1orf144)                  |
| <b>FAM89A</b>       | 6.25 | 3.35 NM_198552.1    | family with sequence similarity 89                              |
| <b>TJAP1</b>        | 5.96 | 3.35 NM_080604.1    | tight junction associated protein 1 (peripheral) (TJAP1)        |
| <b>M6PR</b>         | 5.89 | 3.33 NM_002355.2    | mannose-6-phosphate receptor (cation dependent) (M6PR)          |
| <b>JOSD1</b>        | 5.79 | 3.33 NM_014876.3    | Josephin domain containing 1 (JOSD1)                            |
| <b>LOC399748</b>    | 5.62 | 3.33 XR_018212.1    | PREDICTED: misc_RNA (LOC399748)                                 |
| <b>MNT</b>          | 5.98 | 3.32 NM_020310.2    | MAX binding protein (MNT)                                       |
| <b>IGF2BP2</b>      | 5.9  | 3.32 NM_006548.4    | insulin-like growth factor 2 mRNA binding protein 2 (IGF2BP2)   |
| <b>FABP5L2</b>      | 5.84 | 3.32 XM_001721172.1 | PREDICTED: fatty acid binding protein 5-like 2 (FABP5L2)        |
| <b>HPS5</b>         | 6.14 | 3.31 NM_007216.3    | Hermansky-Pudlak syndrome 5 (HPS5)                              |
| <b>STARD3NL</b>     | 5.91 | 3.31 NM_032016.2    | STARD3 N-terminal like (STARD3NL)                               |
| <b>BIVM</b>         | 5.82 | 3.31 NM_017693.2    | basic                                                           |
| <b>ORMDL1</b>       | 5.5  | 3.31 NM_016467.3    | ORM1-like 1 (S. cerevisiae) (ORMDL1)                            |
| <b>INO80</b>        | 5.92 | 3.29 NM_017553.1    | INO80 homolog (S. cerevisiae) (INO80)                           |
| <b>ADIPOR1</b>      | 5.72 | 3.29 NM_015999.2    | adiponectin receptor 1 (ADIPOR1)                                |
| <b>MICA</b>         | 6.22 | 3.27 NM_000247.1    | MHC class I polypeptide-related sequence A (MICA)               |
| <b>ADIPOR1</b>      | 5.55 | 3.27 NM_015999.2    | adiponectin receptor 1 (ADIPOR1)                                |
| <b>TMEM147</b>      | 5.3  | 3.27 NM_032635.2    | transmembrane protein 147 (TMEM147)                             |
| <b>MRPL54</b>       | 5.5  | 3.26 NM_172251.1    | mitochondrial ribosomal protein L54 (MRPL54)                    |

|                     |      |                     |                                                                                       |
|---------------------|------|---------------------|---------------------------------------------------------------------------------------|
| <b>SLC10A7</b>      | 6.05 | 3.24 NM_001029998.2 | solute carrier family 10 (sodium/bile acid cotransporter family)                      |
| <b>TFPI</b>         | 5.66 | 3.24 NM_006287.4    | tissue factor pathway inhibitor (lipoprotein-associated coagulation inhibitor) (TFPI) |
| <b>CHD9</b>         | 5.43 | 3.24 NM_025134.4    | chromodomain helicase DNA binding protein 9 (CHD9)                                    |
| <b>MAP2K4</b>       | 5.7  | 3.23 NM_003010.2    | mitogen-activated protein kinase kinase 4 (MAP2K4)                                    |
| <b>LOC100134648</b> | 6.02 | 3.22 XM_001724681.1 | PREDICTED: similar to hCG2024106                                                      |
| <b>RBPMS</b>        | 6.01 | 3.22 NM_001008712.1 | RNA binding protein with multiple splicing (RBPMS)                                    |
| <b>MICB</b>         | 5.95 | 3.22 NM_005931.2    | MHC class I polypeptide-related sequence B (MICB)                                     |
| <b>MYBL1</b>        | 5.7  | 3.22 NM_001080416.1 | v-myb myeloblastosis viral oncogene homolog (avian)-like 1 (MYBL1)                    |
| <b>TERF2IP</b>      | 5.67 | 3.22 NM_018975.2    | telomeric repeat binding factor 2                                                     |
| <b>SUZ12</b>        | 5.24 | 3.21 NM_015355.1    | suppressor of zeste 12 homolog (Drosophila) (SUZ12)                                   |
| <b>RAC2</b>         | 5.83 | 3.2 NM_002872.3     | ras-related C3 botulinum toxin substrate 2 (rho family)                               |
| <b>UHRF2</b>        | 5.72 | 3.2 NM_152896.1     | ubiquitin-like with PHD and ring finger domains 2 (UHRF2)                             |
| <b>NBL1</b>         | 5.66 | 3.19 NM_182744.1    | neuroblastoma                                                                         |
| <b>CCNH</b>         | 5.5  | 3.19 NM_001239.2    | cyclin H (CCNH)                                                                       |
| <b>RBM25</b>        | 5.22 | 3.18 NM_021239.1    | RNA binding motif protein 25 (RBM25)                                                  |
| <b>FOXA1</b>        | 5.42 | 3.17 NM_004496.2    | forkhead box A1 (FOXA1)                                                               |
| <b>MKNK2</b>        | 5.24 | 3.17 NM_017572.2    | MAP kinase interacting serine/threonine kinase 2 (MKNK2)                              |
| <b>UBE2Q2</b>       | 5.32 | 3.16 NM_173469.1    | ubiquitin-conjugating enzyme E2Q family member 2 (UBE2Q2)                             |
| <b>COMMD3</b>       | 5.31 | 3.16 NM_012071.2    | COMM domain containing 3 (COMMD3)                                                     |
| <b>PDCD5</b>        | 5.27 | 3.16 NM_004708.2    | programmed cell death 5 (PDCD5)                                                       |
| <b>CAPRN2</b>       | 5.93 | 3.15 NM_023925.3    | caprin family member 2 (CAPRN2)                                                       |
| <b>TMTC1</b>        | 5.55 | 3.15 NM_175861.2    | transmembrane and tetratricopeptide repeat containing 1 (TMTC1)                       |
| <b>PGRMC2</b>       | 4.99 | 3.15 NM_006320.1    | progesterone receptor membrane component 2 (PGRMC2)                                   |
| <b>GANAB</b>        | 5.74 | 3.14 NM_198334.1    | glucosidase                                                                           |
| <b>TPRG1L</b>       | 5.19 | 3.14 NM_182752.3    | tumor protein p63 regulated 1-like (TPRG1L)                                           |
| <b>FASTK</b>        | 5.51 | 3.13 NM_033015.2    | Fas-activated serine/threonine kinase (FASTK)                                         |
| <b>KIAA0460</b>     | 6.09 | 3.12 NM_015203.2    | KIAA0460 (KIAA0460)                                                                   |
| <b>DEK</b>          | 4.76 | 3.11 NM_003472.2    | DEK oncogene (DNA binding) (DEK)                                                      |
| <b>SFT2D2</b>       | 5.96 | 3.1 NM_199344.2     | SFT2 domain containing 2 (SFT2D2)                                                     |
| <b>RPS26</b>        | 5.78 | 3.1 NM_001029.3     | ribosomal protein S26 (RPS26)                                                         |
| <b>MUTED</b>        | 5.66 | 3.1 NM_201280.1     | muted homolog (mouse) (MUTED)                                                         |
| <b>SUV39H1</b>      | 5.64 | 3.1 NM_003173.2     | suppressor of variegation 3-9 homolog 1 (Drosophila) (SUV39H1)                        |
| <b>TUSC2</b>        | 5.54 | 3.1 NM_007275.1     | tumor suppressor candidate 2 (TUSC2)                                                  |
| <b>CA2</b>          | 5.36 | 3.1 NM_000067.1     | carbonic anhydrase II (CA2)                                                           |
| <b>ADD3</b>         | 4.93 | 3.1 NM_001121.2     | adducin 3 (gamma) (ADD3)                                                              |
| <b>UBR5</b>         | 5.52 | 3.09 NM_015902.4    | ubiquitin protein ligase E3 component n-recognin 5 (UBR5)                             |
| <b>ANKRA2</b>       | 5.37 | 3.09 NM_023039.2    | ankyrin repeat                                                                        |
| <b>NBL1</b>         | 5.58 | 3.08 NM_005380.4    | neuroblastoma                                                                         |
| <b>ADIPOR2</b>      | 5.32 | 3.07 NM_024551.2    | adiponectin receptor 2 (ADIPOR2)                                                      |
| <b>STX3</b>         | 5.3  | 3.07 NM_004177.3    | syntaxin 3 (STX3)                                                                     |
| <b>NUFIP2</b>       | 5.18 | 3.06 NM_020772.1    | nuclear fragile X mental retardation protein interacting protein 2 (NUFIP2)           |
| <b>FAM89A</b>       | 5.75 | 3.05 XM_939093.1    | family with sequence similarity 89                                                    |
| <b>FAM73B</b>       | 5.71 | 3.03 NM_032809.2    | family with sequence similarity 73                                                    |
| <b>IRAK2</b>        | 5.32 | 3.03 NM_001570.3    | interleukin-1 receptor-associated kinase 2 (IRAK2)                                    |
| <b>PIP5K2B</b>      | 4.94 | 3.02 NM_138687.1    | phosphatidylinositol-4-phosphate 5-kinase                                             |
| <b>JUNB</b>         | 5.31 | 3.01 NM_002229.2    | jun B proto-oncogene (JUNB)                                                           |
| <b>PFKFB3</b>       | 5.12 | 3.01 NM_004566.2    | 6-phosphofructo-2-kinase/fructose-2                                                   |
| <b>TSC22D2</b>      | 5.07 | 3.01 NM_014779.2    | TSC22 domain family                                                                   |
| <b>LOC100132037</b> | 4.31 | 3 XM_001725987.1    | PREDICTED: similar to mCG7602 (LOC100132037)                                          |

|                 |      |      |                |                                                                                       |
|-----------------|------|------|----------------|---------------------------------------------------------------------------------------|
| <b>ANKRD57</b>  | 5.18 | 2.99 | NM_023016.3    | ankyrin repeat domain 57 (ANKRD57)                                                    |
| <b>C11orf59</b> | 4.81 | 2.99 | NM_017907.1    | chromosome 11 open reading frame 59 (C11orf59)                                        |
| <b>AXUD1</b>    | 5.5  | 2.98 | NM_033027.2    | AXIN1 up-regulated 1 (AXUD1)                                                          |
| <b>BRP44L</b>   | 5.48 | 2.98 | NM_016098.1    | brain protein 44-like (BRP44L)                                                        |
| <b>KIAA1598</b> | 5.26 | 2.98 | NM_018330.4    | KIAA1598 (KIAA1598)                                                                   |
| <b>ADA</b>      | 5.45 | 2.97 | NM_000022.2    | adenosine deaminase (ADA)                                                             |
| <b>TFPI</b>     | 5.34 | 2.97 | NM_006287.4    | tissue factor pathway inhibitor (lipoprotein-associated coagulation inhibitor) (TFPI) |
| <b>TMEM9B</b>   | 5.27 | 2.97 | NM_020644.1    | TMEM9 domain family                                                                   |
| <b>ZHX1</b>     | 5.19 | 2.97 | NM_007222.3    | zinc fingers and homeoboxes 1 (ZHX1)                                                  |
| <b>MGAT4B</b>   | 5.13 | 2.97 | NM_054013.2    | mannosyl (alpha-1                                                                     |
| <b>ZFPM1</b>    | 5.62 | 2.94 | NM_153813.2    | zinc finger protein                                                                   |
| <b>ABHD14B</b>  | 5.47 | 2.94 | NM_032750.1    | abhydrolase domain containing 14B (ABHD14B)                                           |
| <b>ZDHHC9</b>   | 5.31 | 2.94 | NM_016032.2    | zinc finger                                                                           |
| <b>DNAJC9</b>   | 4.75 | 2.94 | NM_015190.3    | DnaJ (Hsp40) homolog                                                                  |
| <b>ADPGK</b>    | 5.54 | 2.93 | NM_031284.3    | ADP-dependent glucokinase (ADPGK)                                                     |
| <b>FAHD1</b>    | 5.45 | 2.93 | NM_001018104.1 | fumarylacetoacetate hydrolase domain containing 1 (FAHD1)                             |
| <b>C2orf64</b>  | 5.35 | 2.93 | NM_001008215.1 | chromosome 2 open reading frame 64 (C2orf64)                                          |
| <b>FAHD1</b>    | 5.02 | 2.93 | NM_031208.1    | fumarylacetoacetate hydrolase domain containing 1 (FAHD1)                             |
| <b>ARHGEF10</b> | 5.37 | 2.92 | NM_014629.2    | Rho guanine nucleotide exchange factor (GEF) 10 (ARHGEF10)                            |
| <b>ADORA2B</b>  | 5.31 | 2.91 | NM_000676.2    | adenosine A2b receptor (ADORA2B)                                                      |
| <b>CYBRD1</b>   | 5.2  | 2.91 | NM_024843.2    | cytochrome b reductase 1 (CYBRD1)                                                     |
| <b>TAF10</b>    | 5.17 | 2.91 | NM_006284.2    | TAF10 RNA polymerase II                                                               |
| <b>SNIP1</b>    | 4.75 | 2.91 | NM_024700.2    | Smad nuclear interacting protein 1 (SNIP1)                                            |
| <b>KIAA1737</b> | 5.2  | 2.9  | NM_033426.2    | KIAA1737 (KIAA1737)                                                                   |
| <b>KLF11</b>    | 5.2  | 2.9  | XM_001129527.1 | PREDICTED: Kruppel-like factor 11 (KLF11)                                             |
| <b>PRDM4</b>    | 5.05 | 2.9  | NM_012406.3    | PR domain containing 4 (PRDM4)                                                        |
| <b>C7orf30</b>  | 4.57 | 2.9  | NM_138446.1    | chromosome 7 open reading frame 30 (C7orf30)                                          |
| <b>ARL4A</b>    | 5.27 | 2.89 | NM_001037164.1 | ADP-ribosylation factor-like 4A (ARL4A)                                               |
| <b>DNM1L</b>    | 5.03 | 2.89 | NM_012062.2    | dynamamin 1-like (DNM1L)                                                              |
| <b>DUT</b>      | 4.85 | 2.89 | NM_001025249.1 | deoxyuridine triphosphatase (DUT)                                                     |
| <b>SLC39A8</b>  | 4.83 | 2.89 | NM_022154.5    | solute carrier family 39 (zinc transporter)                                           |
| <b>SNX16</b>    | 5.31 | 2.88 | NM_022133.2    | sorting nexin 16 (SNX16)                                                              |
| <b>RC3H2</b>    | 5.02 | 2.88 | NM_018835.1    | ring finger and CCCH-type zinc finger domains 2 (RC3H2)                               |
| <b>CDK2</b>     | 4.86 | 2.88 | NM_001798.2    | cyclin-dependent kinase 2 (CDK2)                                                      |
| <b>ASB13</b>    | 5.52 | 2.87 | NM_024701.2    | ankyrin repeat and SOCS box-containing 13 (ASB13)                                     |
| <b>BRMS1L</b>   | 5.06 | 2.87 | NM_032352.3    | breast cancer metastasis-suppressor 1-like (BRMS1L)                                   |
| <b>TMEM8</b>    | 5.52 | 2.86 | NM_021259.1    | transmembrane protein 8 (five membrane-spanning domains) (TMEM8)                      |
| <b>TFAP4</b>    | 5.46 | 2.86 | NM_003223.1    | transcription factor AP-4 (activating enhancer binding protein 4) (TFAP4)             |
| <b>CRTC3</b>    | 4.88 | 2.86 | NM_022769.3    | CREB regulated transcription coactivator 3 (CRTC3)                                    |
| <b>ABTB1</b>    | 5.52 | 2.85 | NM_032548.2    | ankyrin repeat and BTB (POZ) domain containing 1 (ABTB1)                              |
| <b>RUNX3</b>    | 5.35 | 2.84 | NM_004350.2    | runt-related transcription factor 3 (RUNX3)                                           |
| <b>VGLL4</b>    | 5.17 | 2.84 | NM_014667.1    | vestigial like 4 (Drosophila) (VGLL4)                                                 |
| <b>DUT</b>      | 4.55 | 2.84 | NM_001025248.1 | deoxyuridine triphosphatase (DUT)                                                     |
| <b>CMPK1</b>    | 4.49 | 2.84 | NM_016308.1    | cytidine monophosphate (UMP-CMP) kinase 1                                             |
| <b>METRNL</b>   | 5.24 | 2.83 | XM_941466.2    | PREDICTED: meteorin                                                                   |
| <b>MOBKL1B</b>  | 5.15 | 2.83 | NM_018221.3    | MOB1                                                                                  |
| <b>RNF150</b>   | 5.11 | 2.83 | NM_020724.1    | ring finger protein 150 (RNF150)                                                      |
| <b>JAZF1</b>    | 5.06 | 2.82 | NM_175061.3    | JAZF zinc finger 1 (JAZF1)                                                            |
| <b>CYBRD1</b>   | 4.95 | 2.82 | NM_024843.2    | cytochrome b reductase 1 (CYBRD1)                                                     |



|           |      |                     |                                                                           |
|-----------|------|---------------------|---------------------------------------------------------------------------|
| FKBP9L    | 4.78 | 2.82 NM_182827.1    | FK506 binding protein 9-like (FKBP9L)                                     |
| CAP1      | 4.19 | 2.82 NM_006367.2    | CAP                                                                       |
| TSPAN3    | 4.11 | 2.82 NM_005724.4    | tetraspanin 3 (TSPAN3)                                                    |
| CRMP1     | 5.22 | 2.81 NM_001014809.1 | collapsin response mediator protein 1 (CRMP1)                             |
| TMEM54    | 5.4  | 2.8 NM_033504.2     | transmembrane protein 54 (TMEM54)                                         |
| PNKD      | 5.27 | 2.8 NM_022572.2     | paroxysmal nonkinesinogenic dyskinesia (PNKD)                             |
| DEDD      | 5.11 | 2.8 NM_001039712.1  | death effector domain containing (DEDD)                                   |
| ICMT      | 4.93 | 2.8 NM_012405.3     | isopenylcysteine carboxyl methyltransferase (ICMT)                        |
| GART      | 4.88 | 2.8 NM_000819.3     | phosphoribosylglycinamide formyltransferase                               |
| NPAS2     | 4.8  | 2.8 NM_002518.3     | neuronal PAS domain protein 2 (NPAS2)                                     |
| LOC440731 | 5.02 | 2.79 XM_933693.2    | PREDICTED: hypothetical LOC440731                                         |
| G6PD      | 4.71 | 2.79 NM_000402.3    | glucose-6-phosphate dehydrogenase (G6PD)                                  |
| FOXQ1     | 5.06 | 2.78 NM_033260.3    | forkhead box Q1 (FOXQ1)                                                   |
| RHOC      | 4.18 | 2.78 NM_175744.4    | ras homolog gene family                                                   |
| TEX2      | 5.07 | 2.77 NM_018469.3    | testis expressed 2 (TEX2)                                                 |
| CBX6      | 5.06 | 2.77 NM_014292.3    | chromobox homolog 6 (CBX6)                                                |
| ASAP2     | 4.4  | 2.77 NM_003887.2    | ArfGAP with SH3 domain                                                    |
| JDP2      | 5.4  | 2.76 NM_130469.2    | Jun dimerization protein 2 (JDP2)                                         |
| TMEM111   | 4.98 | 2.76 NM_018447.1    | transmembrane protein 111 (TMEM111)                                       |
| CREB3L2   | 4.8  | 2.76 NM_194071.2    | cAMP responsive element binding protein 3-like 2 (CREB3L2)                |
| FAM127B   | 5.25 | 2.75 NM_001078172.1 | family with sequence similarity 127                                       |
| ECHDC2    | 5.07 | 2.74 NM_018281.2    | enoyl Coenzyme A hydratase domain containing 2 (ECHDC2)                   |
| SACM1L    | 4.99 | 2.74 NM_014016.2    | SAC1 suppressor of actin mutations 1-like (yeast) (SACM1L)                |
| GHITM     | 3.86 | 2.74 NM_014394.2    | growth hormone inducible transmembrane protein (GHITM)                    |
| LOC649679 | 5.17 | 2.73 XM_945045.1    | PREDICTED: similar to Tubulin beta-4q chain                               |
| CASP2     | 4.74 | 2.73 NM_032982.2    | caspase 2                                                                 |
| DUT       | 4.43 | 2.73 NM_001025248.1 | deoxyuridine triphosphatase (DUT)                                         |
| NCOA3     | 4.99 | 2.72 NM_181659.1    | nuclear receptor coactivator 3 (NCOA3)                                    |
| HBXIP     | 4.14 | 2.72 NM_006402.2    | hepatitis B virus x interacting protein (HBXIP)                           |
| ASF1B     | 4.45 | 2.71 NM_018154.2    | ASF1 anti-silencing function 1 homolog B ( <i>S. cerevisiae</i> ) (ASF1B) |
| SKA2      | 4.44 | 2.71 NM_182620.3    | spindle and kinetochore associated complex subunit 2 (SKA2)               |
| TBC1D20   | 5.15 | 2.7 NM_144628.2     | TBC1 domain family                                                        |
| ZNHIT6    | 4.91 | 2.7 NM_017953.2     | zinc finger                                                               |
| MTCH2     | 4.99 | 2.69 NM_014342.2    | mitochondrial carrier homolog 2 ( <i>C. elegans</i> ) (MTCH2)             |
| SS18L1    | 4.92 | 2.69 NM_198935.1    | synovial sarcoma translocation gene on chromosome 18-like 1 (SS18L1)      |
| API5      | 4.78 | 2.68 NM_006595.2    | apoptosis inhibitor 5 (API5)                                              |
| PANK1     | 4.75 | 2.68 NM_138316.2    | pantothenate kinase 1 (PANK1)                                             |
| IRF9      | 4.69 | 2.68 NM_006084.4    | interferon regulatory factor 9 (IRF9)                                     |
| LOC645058 | 4.21 | 2.68 XM_930423.1    | PREDICTED: similar to hepatitis B virus x-interacting protein (LOC645058) |
| SLC29A2   | 5.33 | 2.67 NM_001532.2    | solute carrier family 29 (nucleoside transporters)                        |
| USP24     | 4.84 | 2.67 NM_015306.1    | ubiquitin specific peptidase 24 (USP24)                                   |
| MED31     | 4.8  | 2.67 NM_016060.2    | mediator complex subunit 31 (MED31)                                       |
| ASAP1     | 4.5  | 2.67 NM_018482.2    | ArfGAP with SH3 domain                                                    |
| SLC25A39  | 3.99 | 2.67 NM_016016.1    | solute carrier family 25                                                  |
| PYCARD    | 4.98 | 2.66 NM_013258.3    | PYD and CARD domain containing (PYCARD)                                   |
| FNBP1     | 4.71 | 2.66 NM_015033.2    | formin binding protein 1 (FNBP1)                                          |
| C14orf100 | 4.67 | 2.66 NM_016475.2    | chromosome 14 open reading frame 100 (C14orf100)                          |
| ZNF217    | 4.62 | 2.66 NM_006526.2    | zinc finger protein 217 (ZNF217)                                          |
| NNT       | 4.39 | 2.66 NM_012343.3    | nicotinamide nucleotide transhydrogenase (NNT)                            |

|                  |      |                     |                                                                            |
|------------------|------|---------------------|----------------------------------------------------------------------------|
| <b>COPS3</b>     | 4.26 | 2.66 NM_003653.2    | COP9 constitutive photomorphogenic homolog subunit 3 (Arabidopsis) (COPS3) |
| <b>TMEM158</b>   | 4.39 | 2.65 NM_015444.2    | transmembrane protein 158 (TMEM158)                                        |
| <b>FAM60A</b>    | 4.37 | 2.65 NM_001135811.1 | family with sequence similarity 60                                         |
| <b>SSBP1</b>     | 4.24 | 2.65 NM_003143.1    | single-stranded DNA binding protein 1 (SSBP1)                              |
| <b>NKIRAS1</b>   | 5.08 | 2.64 NM_020345.3    | NFKB inhibitor interacting Ras-like 1 (NKIRAS1)                            |
| <b>CABLES1</b>   | 4.74 | 2.64 NM_138375.1    | Cdk5 and Abl enzyme substrate 1 (CABLES1)                                  |
| <b>HCCS</b>      | 4.73 | 2.64 NM_005333.2    | holocytochrome c synthase (cytochrome c heme-lyase) (HCCS)                 |
| <b>CNIH</b>      | 4.48 | 2.64 NM_001009551.1 | cornichon homolog (Drosophila) (CNIH)                                      |
| <b>MBOAT7</b>    | 4.96 | 2.63 NM_024298.2    | membrane bound O-acyltransferase domain containing 7 (MBOAT7)              |
| <b>EPHB4</b>     | 4.89 | 2.63 NM_004444.4    | EPH receptor B4 (EPHB4)                                                    |
| <b>LOC401076</b> | 4.68 | 2.63 XR_038201.1    | PREDICTED: misc_RNA (LOC401076)                                            |
| <b>NDEL1</b>     | 4.49 | 2.62 NM_030808.3    | nudE nuclear distribution gene E homolog (A. nidulans)-like 1 (NDEL1)      |
| <b>MAD2L2</b>    | 4.31 | 2.62 NM_006341.2    | MAD2 mitotic arrest deficient-like 2 (yeast) (MAD2L2)                      |
| <b>DNAJB9</b>    | 4.99 | 2.61 NM_012328.1    | DnaJ (Hsp40) homolog                                                       |
| <b>C11orf51</b>  | 4.85 | 2.61 NM_014042.1    | chromosome 11 open reading frame 51 (C11orf51)                             |
| <b>KATNAL1</b>   | 4.85 | 2.6 NM_001014380.1  | katanin p60 subunit A-like 1 (KATNAL1)                                     |
| <b>ABLIM1</b>    | 4.08 | 2.6 NM_006720.3     | actin binding LIM protein 1 (ABLIM1)                                       |
| <b>PPP2R2D</b>   | 4.67 | 2.59 NM_001003656.1 | protein phosphatase 2                                                      |
| <b>NFIC</b>      | 4.65 | 2.59 NM_205843.1    | nuclear factor I/C (CCAAT-binding transcription factor) (NFIC)             |
| <b>DNM1L</b>     | 4.62 | 2.59 NM_012062.2    | dynamamin 1-like (DNM1L)                                                   |
| <b>ZNF511</b>    | 4.62 | 2.59 NM_145806.2    | zinc finger protein 511 (ZNF511)                                           |
| <b>YOD1</b>      | 4.47 | 2.59 NM_018566.3    | YOD1 OTU deubiquinating enzyme 1 homolog (S. cerevisiae) (YOD1)            |
| <b>SIK3</b>      | 4.84 | 2.58 NM_025164.3    | SIK family kinase 3 (SIK3)                                                 |
| <b>PARP6</b>     | 4.82 | 2.57 NM_020213.1    | poly (ADP-ribose) polymerase family                                        |
| <b>SC4MOL</b>    | 4.74 | 2.57 NM_001017369.1 | sterol-C4-methyl oxidase-like (SC4MOL)                                     |
| <b>LCOR</b>      | 4.52 | 2.57 NM_032440.1    | ligand dependent nuclear receptor corepressor (LCOR)                       |
| <b>LOC644563</b> | 4    | 2.57 XR_018203.2    | PREDICTED: misc_RNA (LOC644563)                                            |
| <b>NFX1</b>      | 4.84 | 2.56 NM_002504.3    | nuclear transcription factor                                               |
| <b>BMI1</b>      | 4.23 | 2.56 NM_005180.5    | BMI1 polycomb ring finger oncogene (BMI1)                                  |
| <b>RABGAP1</b>   | 4.2  | 2.56 NM_012197.2    | RAB GTPase activating protein 1 (RABGAP1)                                  |
| <b>ABCE1</b>     | 4.11 | 2.56 NM_001040876.1 | ATP-binding cassette                                                       |
| <b>LMO4</b>      | 4.04 | 2.56 NM_006769.2    | LIM domain only 4 (LMO4)                                                   |
| <b>LPCAT1</b>    | 4.8  | 2.55 NM_024830.3    | lysophosphatidylcholine acyltransferase 1 (LPCAT1)                         |
| <b>LOC387934</b> | 4.77 | 2.55 XM_937508.2    | PREDICTED: similar to Fatty acid-binding protein                           |
| <b>MED8</b>      | 4.73 | 2.55 NM_001001651.1 | mediator of RNA polymerase II transcription                                |
| <b>ZBTB34</b>    | 3.84 | 2.55 NM_001099270.1 | zinc finger and BTB domain containing 34 (ZBTB34)                          |
| <b>BTG2</b>      | 4.68 | 2.54 NM_006763.2    | BTG family                                                                 |
| <b>NPTN</b>      | 4.07 | 2.54 NM_012428.2    | neuroplastin (NPTN)                                                        |
| <b>TIGA1</b>     | 3.96 | 2.54 NM_053000.1    | TIGA1 (TIGA1)                                                              |
| <b>STARD7</b>    | 3.75 | 2.54 NM_020151.2    | START domain containing 7 (STARD7)                                         |
| <b>PDIA5</b>     | 4.84 | 2.53 NM_006810.2    | protein disulfide isomerase family A                                       |
| <b>EIF4EBP2</b>  | 4.5  | 2.53 NM_004096.3    | eukaryotic translation initiation factor 4E binding protein 2 (EIF4EBP2)   |
| <b>DDEF2</b>     | 4.04 | 2.53 NM_003887.1    | development and differentiation enhancing factor 2 (DDEF2)                 |
| <b>CNOT6</b>     | 4.4  | 2.52 NM_015455.3    | CCR4-NOT transcription complex                                             |
| <b>ATP6V0E1</b>  | 4.09 | 2.52 NM_003945.3    | ATPase                                                                     |
| <b>LOC648742</b> | 5.08 | 2.51 XM_001714210.1 | PREDICTED: similar to growth suppressor related (LOC648742)                |
| <b>HPS5</b>      | 4.7  | 2.51 NM_007216.3    | Hermansky-Pudlak syndrome 5 (HPS5)                                         |
| <b>GPR180</b>    | 4.53 | 2.51 NM_180989.4    | G protein-coupled receptor 180 (GPR180)                                    |
| <b>GLIPR2</b>    | 4.46 | 2.51 NM_022343.2    | GLI pathogenesis-related 2 (GLIPR2)                                        |

|                  |      |                     |                                                                           |
|------------------|------|---------------------|---------------------------------------------------------------------------|
| <b>SMG7</b>      | 4.21 | 2.51 NM_173156.1    | Smg-7 homolog                                                             |
| <b>OCIAD1</b>    | 4.17 | 2.51 NM_017830.1    | OCIA domain containing 1 (OCIAD1)                                         |
| <b>SDHA</b>      | 4.04 | 2.51 NM_004168.1    | succinate dehydrogenase complex                                           |
| <b>CPEB3</b>     | 4.41 | 2.5 NM_014912.3     | cytoplasmic polyadenylation element binding protein 3 (CPEB3)             |
| <b>MKRN1</b>     | 4.4  | 2.5 NM_013446.2     | makorin ring finger protein 1 (MKRN1)                                     |
| <b>DAB2</b>      | 3.99 | 2.5 NM_001343.1     | disabled homolog 2                                                        |
| <b>UBC</b>       | 2.96 | 2.5 NM_021009.3     | ubiquitin C (UBC)                                                         |
| <b>GATAD2B</b>   | 4.98 | 2.49 NM_020699.1    | GATA zinc finger domain containing 2B (GATAD2B)                           |
| <b>AIG1</b>      | 4.87 | 2.49 NM_016108.2    | androgen-induced 1 (AIG1)                                                 |
| <b>TRIM8</b>     | 4.63 | 2.49 NM_030912.2    | tripartite motif-containing 8 (TRIM8)                                     |
| <b>BCL6</b>      | 4.6  | 2.49 NM_001706.2    | B-cell CLL/lymphoma 6 (zinc finger protein 51) (BCL6)                     |
| <b>IGF2R</b>     | 4.59 | 2.49 NM_000876.2    | insulin-like growth factor 2 receptor (IGF2R)                             |
| <b>RPRD2</b>     | 4.47 | 2.49 NM_015203.3    | regulation of nuclear pre-mRNA domain containing 2 (RPRD2)                |
| <b>NFIA</b>      | 4.39 | 2.49 NM_005595.1    | nuclear factor I/A (NFIA)                                                 |
| <b>LOC388327</b> | 4.85 | 2.48 XM_371009.4    | PREDICTED: hypothetical LOC388327                                         |
| <b>ATP6V0A2</b>  | 4.65 | 2.48 NM_012463.2    | ATPase                                                                    |
| <b>C11orf82</b>  | 4.53 | 2.48 NM_145018.2    | chromosome 11 open reading frame 82 (C11orf82)                            |
| <b>UBC</b>       | 3.02 | 2.48 NM_021009.1    | ubiquitin C (UBC)                                                         |
| <b>NR4A2</b>     | 4.22 | 2.47 NM_006186.2    | nuclear receptor subfamily 4                                              |
| <b>CENPQ</b>     | 4.54 | 2.46 NM_018132.3    | centromere protein Q (CENPQ)                                              |
| <b>SAR1B</b>     | 4.32 | 2.46 NM_001033503.1 | SAR1 homolog B ( <i>S. cerevisiae</i> ) (SAR1B)                           |
| <b>HDHD2</b>     | 4.21 | 2.46 NM_032124.4    | haloacid dehalogenase-like hydrolase domain containing 2 (HDHD2)          |
| <b>CD164</b>     | 4.69 | 2.45 NM_006016.3    | CD164 molecule                                                            |
| <b>RTCD1</b>     | 4.36 | 2.45 NM_003729.1    | RNA terminal phosphate cyclase domain 1 (RTCD1)                           |
| <b>C15orf57</b>  | 4.31 | 2.45 NM_052849.2    | chromosome 15 open reading frame 57 (C15orf57)                            |
| <b>PRKRIR</b>    | 3.86 | 2.45 NM_004705.2    | protein-kinase                                                            |
| <b>DPP8</b>      | 4.58 | 2.44 NM_017743.4    | dipeptidyl-peptidase 8 (DPP8)                                             |
| <b>PER2</b>      | 4.41 | 2.44 NM_022817.2    | period homolog 2 ( <i>Drosophila</i> ) (PER2)                             |
| <b>FEZ2</b>      | 4.27 | 2.44 NM_005102.2    | fasciculation and elongation protein zeta 2 (zygin II) (FEZ2)             |
| <b>RFC1</b>      | 4.27 | 2.44 NM_002913.3    | replication factor C (activator 1) 1                                      |
| <b>STARD7</b>    | 4.02 | 2.44 NM_139267.1    | START domain containing 7 (STARD7)                                        |
| <b>MFF</b>       | 3.96 | 2.44 NM_020194.4    | mitochondrial fission factor (MFF)                                        |
| <b>PRPF4</b>     | 3.95 | 2.44 NM_004697.3    | PRP4 pre-mRNA processing factor 4 homolog (yeast) (PRPF4)                 |
| <b>C10orf140</b> | 4.67 | 2.43 NM_207371.3    | chromosome 10 open reading frame 140 (C10orf140)                          |
| <b>UCHL1</b>     | 4.45 | 2.43 NM_004181.3    | ubiquitin carboxyl-terminal esterase L1 (ubiquitin thiolesterase) (UCHL1) |
| <b>CPNE1</b>     | 4.33 | 2.43 NM_152931.1    | copine I (CPNE1)                                                          |
| <b>PLSCR4</b>    | 4.32 | 2.43 NM_020353.1    | phospholipid scramblase 4 (PLSCR4)                                        |
| <b>CA2</b>       | 4.21 | 2.43 NM_000067.1    | carbonic anhydrase II (CA2)                                               |
| <b>EIF2AK1</b>   | 3.62 | 2.43 NM_014413.2    | eukaryotic translation initiation factor 2-alpha kinase 1 (EIF2AK1)       |
| <b>UCP2</b>      | 4.72 | 2.42 NM_003355.2    | uncoupling protein 2 (mitochondrial)                                      |
| <b>CXCL1</b>     | 4.56 | 2.42 NM_001511.1    | chemokine (C-X-C motif) ligand 1 (melanoma growth stimulating activity)   |
| <b>ATMIN</b>     | 4.49 | 2.42 NM_015251.2    | ATM interactor (ATMIN)                                                    |
| <b>GNPTAB</b>    | 4.43 | 2.42 NM_024312.3    | N-acetylglucosamine-1-phosphate transferase                               |
| <b>ATP6V1B2</b>  | 4.26 | 2.42 NM_001693.3    | ATPase                                                                    |
| <b>LOC650369</b> | 3.58 | 2.42 XR_018848.1    | PREDICTED: similar to family with sequence similarity 60                  |
| <b>TESK1</b>     | 4.56 | 2.41 NM_006285.2    | testis-specific kinase 1 (TESK1)                                          |
| <b>LOC642031</b> | 4.51 | 2.41 XM_936101.2    | PREDICTED: hypothetical protein LOC642031 (LOC642031)                     |
| <b>C5orf30</b>   | 4.35 | 2.41 NM_033211.2    | chromosome 5 open reading frame 30 (C5orf30)                              |
| <b>TRAPPC4</b>   | 4.18 | 2.41 NM_016146.3    | trafficking protein particle complex 4 (TRAPPC4)                          |

|                   |      |                     |                                                                           |
|-------------------|------|---------------------|---------------------------------------------------------------------------|
| <b>PRPF38A</b>    | 4.15 | 2.41 NM_032864.3    | PRP38 pre-mRNA processing factor 38 (yeast) domain containing A (PRPF38A) |
| <b>DHRS3</b>      | 4.04 | 2.41 NM_004753.4    | dehydrogenase/reductase (SDR family) member 3 (DHRS3)                     |
| <b>RRN3</b>       | 4    | 2.41 NM_018427.3    | RRN3 RNA polymerase I transcription factor homolog (S. cerevisiae) (RRN3) |
| <b>ATG16L1</b>    | 3.98 | 2.41 NM_030803.5    | ATG16 autophagy related 16-like 1 (S. cerevisiae) (ATG16L1)               |
| <b>UBE2E3</b>     | 3.67 | 2.41 NM_006357.2    | ubiquitin-conjugating enzyme E2E 3 (UBC4/5 homolog)                       |
| <b>DKC1</b>       | 3.64 | 2.41 NM_001363.2    | dyskeratosis congenita 1                                                  |
| <b>GGA2</b>       | 4.67 | 2.4 NM_015044.3     | golgi associated                                                          |
| <b>ARHGEF3</b>    | 4.31 | 2.4 NM_019555.1     | Rho guanine nucleotide exchange factor (GEF) 3 (ARHGEF3)                  |
| <b>PBX3</b>       | 4.14 | 2.4 NM_006195.4     | pre-B-cell leukemia homeobox 3 (PBX3)                                     |
| <b>ASAP2</b>      | 3.9  | 2.4 NM_003887.2     | ArfGAP with SH3 domain                                                    |
| <b>ZNF219</b>     | 4.47 | 2.39 NM_016423.1    | zinc finger protein 219 (ZNF219)                                          |
| <b>C20orf177</b>  | 4.25 | 2.39 NM_022106.1    | chromosome 20 open reading frame 177 (C20orf177)                          |
| <b>ASF1A</b>      | 4.14 | 2.39 NM_014034.1    | ASF1 anti-silencing function 1 homolog A (S. cerevisiae) (ASF1A)          |
| <b>KDM5B</b>      | 4.3  | 2.38 NM_006618.3    | lysine (K)-specific demethylase 5B (KDM5B)                                |
| <b>CNIH</b>       | 3.94 | 2.38 NM_005776.2    | cornichon homolog (Drosophila) (CNIH)                                     |
| <b>LMO4</b>       | 3.84 | 2.38 NM_006769.2    | LIM domain only 4 (LMO4)                                                  |
| <b>RHOC</b>       | 3.8  | 2.38 NM_001042678.1 | ras homolog gene family                                                   |
| <b>NCRNA00219</b> | 3.66 | 2.38 NR_015370.1    | non-protein coding RNA 219 (NCRNA00219)                                   |
| <b>SVIL</b>       | 4.15 | 2.37 NM_003174.3    | supervillin (SVIL)                                                        |
| <b>ASAP1</b>      | 4.11 | 2.37 NM_018482.2    | ArfGAP with SH3 domain                                                    |
| <b>PPP1R8</b>     | 4.17 | 2.36 NM_014110.3    | protein phosphatase 1                                                     |
| <b>MLLT6</b>      | 4.16 | 2.36 NM_005937.3    | myeloid/lymphoid or mixed-lineage leukemia (trithorax homolog)            |
| <b>HNRPUL1</b>    | 3.93 | 2.36 NM_144732.1    | heterogeneous nuclear ribonucleoprotein U-like 1 (HNRPUL1)                |
| <b>VIL2</b>       | 3.8  | 2.36 NM_003379.3    | villin 2 (ezrin) (VIL2)                                                   |
| <b>RSPRY1</b>     | 3.57 | 2.36 NM_133368.1    | ring finger and SPRY domain containing 1 (RSPRY1)                         |
| <b>PI4KB</b>      | 4.45 | 2.35 NM_002651.1    | phosphatidylinositol 4-kinase                                             |
| <b>SLC25A28</b>   | 4.35 | 2.35 NM_031212.3    | solute carrier family 25                                                  |
| <b>SLC35C2</b>    | 4.22 | 2.35 NM_015945.10   | solute carrier family 35                                                  |
| <b>KLHL5</b>      | 3.58 | 2.35 NM_001007075.1 | kelch-like 5 (Drosophila) (KLHL5)                                         |
| <b>LOC642590</b>  | 3.53 | 2.35 XR_037021.1    | PREDICTED: misc_RNA (LOC642590)                                           |
| <b>LOC728467</b>  | 4.44 | 2.34 XR_039554.1    | PREDICTED: misc_RNA (LOC728467)                                           |
| <b>USP21</b>      | 4.22 | 2.34 NM_012475.4    | ubiquitin specific peptidase 21 (USP21)                                   |
| <b>INPP5A</b>     | 4.2  | 2.34 XM_001133189.1 | PREDICTED: inositol polyphosphate-5-phosphatase                           |
| <b>PPTC7</b>      | 4.2  | 2.34 NM_139283.1    | PTC7 protein phosphatase homolog (S. cerevisiae) (PPTC7)                  |
| <b>SLC39A8</b>    | 4.2  | 2.34 NM_022154.5    | solute carrier family 39 (zinc transporter)                               |
| <b>MAP7</b>       | 4.14 | 2.34 NM_003980.3    | microtubule-associated protein 7 (MAP7)                                   |
| <b>C18orf25</b>   | 3.93 | 2.34 NM_001008239.2 | chromosome 18 open reading frame 25 (C18orf25)                            |
| <b>ATP6V0E1</b>   | 3.27 | 2.34 NM_003945.3    | ATPase                                                                    |
| <b>PPP3CB</b>     | 4.13 | 2.33 NM_021132.1    | protein phosphatase 3 (formerly 2B)                                       |
| <b>FAF2</b>       | 3.96 | 2.33 NM_014613.2    | Fas associated factor family member 2 (FAF2)                              |
| <b>CALM1</b>      | 3.64 | 2.33 NM_006888.3    | calmodulin 1 (phosphorylase kinase)                                       |
| <b>C5orf35</b>    | 4.11 | 2.32 NM_153706.2    | chromosome 5 open reading frame 35 (C5orf35)                              |
| <b>TBC1D9</b>     | 4.11 | 2.32 NM_015130.2    | TBC1 domain family                                                        |
| <b>CPOX</b>       | 4.1  | 2.32 NM_000097.4    | coproporphyrinogen oxidase (CPOX)                                         |
| <b>TSR2</b>       | 4.04 | 2.32 NM_058163.1    | TSR2                                                                      |
| <b>EZR</b>        | 3.56 | 2.32 NM_003379.4    | ezrin (EZR)                                                               |
| <b>LOC642590</b>  | 3.35 | 2.32 XR_016251.2    | PREDICTED: misc_RNA (LOC642590)                                           |
| <b>ZBTB5</b>      | 4.3  | 2.31 NM_014872.1    | zinc finger and BTB domain containing 5 (ZBTB5)                           |
| <b>ADARB1</b>     | 4.12 | 2.31 NM_001112.2    | adenosine deaminase                                                       |

|                  |      |                     |                                                                         |
|------------------|------|---------------------|-------------------------------------------------------------------------|
| <b>SNRK</b>      | 4.09 | 2.31 NM_017719.3    | SNF related kinase (SNRK)                                               |
| <b>MTAP</b>      | 3.73 | 2.31 NM_002451.3    | methylthioadenosine phosphorylase (MTAP)                                |
| <b>EIF2C2</b>    | 3.69 | 2.31 NM_012154.2    | eukaryotic translation initiation factor 2C                             |
| <b>NPTN</b>      | 3.37 | 2.31 NM_017455.2    | neuroplastin (NPTN)                                                     |
| <b>SRPX</b>      | 4.5  | 2.3 NM_006307.3     | sushi-repeat-containing protein                                         |
| <b>MKRN3</b>     | 4.44 | 2.3 NM_005664.3     | makorin ring finger protein 3 (MKRN3)                                   |
| <b>LDOC1</b>     | 4.19 | 2.3 NM_012317.2     | leucine zipper                                                          |
| <b>PLAGL2</b>    | 4.01 | 2.3 NM_002657.2     | pleiomorphic adenoma gene-like 2 (PLAGL2)                               |
| <b>PPP2R4</b>    | 3.97 | 2.3 NM_021131.3     | protein phosphatase 2A activator                                        |
| <b>C19orf48</b>  | 3.93 | 2.3 NM_199250.1     | chromosome 19 open reading frame 48 (C19orf48)                          |
| <b>LOC646347</b> | 3.41 | 2.3 XR_017680.1     | PREDICTED: misc_RNA (LOC646347)                                         |
| <b>SMS</b>       | 3.26 | 2.3 NM_004595.2     | spermine synthase (SMS)                                                 |
| <b>SNORA11D</b>  | 4.32 | 2.29 NR_003711.1    | small nucleolar RNA                                                     |
| <b>GOLSYN</b>    | 4.17 | 2.29 NM_001099743.1 | Golgi-localized protein (GOLSYN)                                        |
| <b>SLC25A37</b>  | 3.99 | 2.29 NM_016612.2    | solute carrier family 25                                                |
| <b>TNFRSF10B</b> | 4.57 | 2.28 NM_147187.1    | tumor necrosis factor receptor superfamily                              |
| <b>FASTK</b>     | 4.2  | 2.28 NM_033015.2    | Fas-activated serine/threonine kinase (FASTK)                           |
| <b>ADNP</b>      | 4.01 | 2.28 NM_181442.1    | activity-dependent neuroprotector homeobox (ADNP)                       |
| <b>MED8</b>      | 3.95 | 2.28 NM_001001654.1 | mediator of RNA polymerase II transcription                             |
| <b>AKT1</b>      | 3.82 | 2.28 NM_001014431.1 | v-akt murine thymoma viral oncogene homolog 1 (AKT1)                    |
| <b>KIF23</b>     | 3.82 | 2.28 NM_004856.4    | kinesin family member 23 (KIF23)                                        |
| <b>TOB1</b>      | 3.79 | 2.28 NM_005749.2    | transducer of ERBB2                                                     |
| <b>RPP40</b>     | 3.77 | 2.28 NM_006638.2    | ribonuclease P/MRP 40kDa subunit (RPP40)                                |
| <b>UBE3C</b>     | 3.68 | 2.28 NM_014671.1    | ubiquitin protein ligase E3C (UBE3C)                                    |
| <b>FH</b>        | 3.66 | 2.28 NM_000143.2    | fumarate hydratase (FH)                                                 |
| <b>ABCE1</b>     | 3.65 | 2.28 NM_001040876.1 | ATP-binding cassette                                                    |
| <b>DEDD</b>      | 4.45 | 2.27 NM_001039712.1 | death effector domain containing (DEDD)                                 |
| <b>PPP1R15A</b>  | 4.14 | 2.27 NM_014330.2    | protein phosphatase 1                                                   |
| <b>AKT1</b>      | 3.97 | 2.27 NM_001014432.1 | v-akt murine thymoma viral oncogene homolog 1 (AKT1)                    |
| <b>E2F5</b>      | 3.88 | 2.27 NM_001951.3    | E2F transcription factor 5                                              |
| <b>TSEN34</b>    | 3.43 | 2.27 NM_001077446.1 | tRNA splicing endonuclease 34 homolog (S. cerevisiae) (TSEN34)          |
| <b>CERCAM</b>    | 4.36 | 2.25 NM_016174.3    | cerebral endothelial cell adhesion molecule (CERCAM)                    |
| <b>RAB11FIP5</b> | 4.35 | 2.25 NM_015470.2    | RAB11 family interacting protein 5 (class I) (RAB11FIP5)                |
| <b>REEP1</b>     | 4.12 | 2.25 NM_022912.1    | receptor accessory protein 1 (REEP1)                                    |
| <b>MRPL48</b>    | 4.02 | 2.25 NM_016055.4    | mitochondrial ribosomal protein L48 (MRPL48)                            |
| <b>ANGEL2</b>    | 3.98 | 2.25 NM_144567.3    | angel homolog 2 (Drosophila) (ANGEL2)                                   |
| <b>RBMS1</b>     | 3.7  | 2.25 NM_002897.3    | RNA binding motif                                                       |
| <b>TCEB1</b>     | 3.26 | 2.25 NM_005648.2    | transcription elongation factor B (SIII)                                |
| <b>SH3RF2</b>    | 4.03 | 2.24 NM_152550.2    | SH3 domain containing ring finger 2 (SH3RF2)                            |
| <b>M160</b>      | 3.89 | 2.24 NM_174941.3    | scavenger receptor cysteine-rich type 1 protein M160 (M160)             |
| <b>AZIN1</b>     | 3.78 | 2.24 NM_015878.4    | antizyme inhibitor 1 (AZIN1)                                            |
| <b>NNT</b>       | 3.74 | 2.24 NM_012343.3    | nicotinamide nucleotide transhydrogenase (NNT)                          |
| <b>WDFY1</b>     | 3.48 | 2.24 NM_020830.3    | WD repeat and FYVE domain containing 1 (WDFY1)                          |
| <b>SLC44A1</b>   | 3.39 | 2.24 NM_080546.3    | solute carrier family 44                                                |
| <b>FBXO31</b>    | 4.26 | 2.23 NM_024735.2    | F-box protein 31 (FBXO31)                                               |
| <b>MASTL</b>     | 4.17 | 2.23 NM_032844.1    | microtubule associated serine/threonine kinase-like (MASTL)             |
| <b>TXNL1</b>     | 3.96 | 2.23 NM_004786.1    | thioredoxin-like 1 (TXNL1)                                              |
| <b>TIMM23</b>    | 3.88 | 2.23 NM_006327.2    | translocase of inner mitochondrial membrane 23 homolog (yeast) (TIMM23) |
| <b>LOC644363</b> | 3.74 | 2.23 XR_016912.2    | PREDICTED: misc_RNA (LOC644363)                                         |

|                     |      |                     |                                                                                  |
|---------------------|------|---------------------|----------------------------------------------------------------------------------|
| <b>GTF3C6</b>       | 3.65 | 2.23 NM_138408.2    | general transcription factor IIIC                                                |
| <b>TGIF1</b>        | 3.62 | 2.23 NM_170695.2    | TGFB-induced factor homeobox 1 (TGIF1)                                           |
| <b>DRAM1</b>        | 3.56 | 2.23 NM_018370.2    | DNA-damage regulated autophagy modulator 1 (DRAM1)                               |
| <b>DUSP2</b>        | 3.76 | 2.22 NM_004418.2    | dual specificity phosphatase 2 (DUSP2)                                           |
| <b>OSBP2</b>        | 3.74 | 2.22 NM_030758.3    | oxysterol binding protein 2 (OSBP2)                                              |
| <b>MRLC2</b>        | 2.88 | 2.22 NM_033546.2    | myosin regulatory light chain MRLC2 (MRLC2)                                      |
| <b>AKIRIN1</b>      | 4.26 | 2.21 NM_024595.1    | akirin 1 (AKIRIN1)                                                               |
| <b>TGFB111</b>      | 4.08 | 2.21 NM_015927.3    | transforming growth factor beta 1 induced transcript 1 (TGFB111)                 |
| <b>PEPD</b>         | 3.81 | 2.21 NM_000285.2    | peptidase D (PEPD)                                                               |
| <b>RAB8A</b>        | 3.54 | 2.21 NM_005370.4    | RAB8A                                                                            |
| <b>LIMK1</b>        | 4.19 | 2.2 NM_016735.1     | LIM domain kinase 1 (LIMK1)                                                      |
| <b>MLL5</b>         | 4.14 | 2.2 NM_018682.3     | myeloid/lymphoid or mixed-lineage leukemia 5 (trithorax homolog)                 |
| <b>CCNG2</b>        | 3.86 | 2.2 NM_004354.1     | cyclin G2 (CCNG2)                                                                |
| <b>ARL1</b>         | 4.12 | 2.19 NM_001177.3    | ADP-ribosylation factor-like 1 (ARL1)                                            |
| <b>SBF1</b>         | 4    | 2.19 NM_002972.1    | SET binding factor 1 (SBF1)                                                      |
| <b>VPS24</b>        | 3.81 | 2.19 NM_001005753.1 | vacuolar protein sorting 24 homolog ( <i>S. cerevisiae</i> ) (VPS24)             |
| <b>MAP7</b>         | 3.74 | 2.19 NM_003980.3    | microtubule-associated protein 7 (MAP7)                                          |
| <b>DCK</b>          | 3.66 | 2.19 NM_000788.1    | deoxycytidine kinase (DCK)                                                       |
| <b>LEPROTL1</b>     | 3.65 | 2.19 NM_015344.1    | leptin receptor overlapping transcript-like 1 (LEPROTL1)                         |
| <b>WAC</b>          | 3.47 | 2.19 NM_016628.2    | WW domain containing adaptor with coiled-coil (WAC)                              |
| <b>GLTP</b>         | 3.44 | 2.19 NM_016433.3    | glycolipid transfer protein (GLTP)                                               |
| <b>SSU72</b>        | 2.89 | 2.19 NM_014188.2    | SSU72 RNA polymerase II CTD phosphatase homolog ( <i>S. cerevisiae</i> ) (SSU72) |
| <b>COG5</b>         | 4.26 | 2.18 NM_006348.2    | component of oligomeric golgi complex 5 (COG5)                                   |
| <b>PRKAG2</b>       | 4.21 | 2.18 NM_024429.1    | protein kinase                                                                   |
| <b>RNF14</b>        | 3.88 | 2.18 NM_183400.1    | ring finger protein 14 (RNF14)                                                   |
| <b>SLC35A4</b>      | 3.59 | 2.18 NM_080670.2    | solute carrier family 35                                                         |
| <b>ATP6V1D</b>      | 3.14 | 2.18 NM_015994.2    | ATPase                                                                           |
| <b>TIMM23</b>       | 3.12 | 2.18 NM_006327.2    | translocase of inner mitochondrial membrane 23 homolog (yeast) (TIMM23)          |
| <b>MAT2A</b>        | 2.81 | 2.18 NM_005911.4    | methionine adenosyltransferase II                                                |
| <b>TMX3</b>         | 3.94 | 2.17 NM_019022.3    | thioredoxin-related transmembrane protein 3 (TMX3)                               |
| <b>DYRK2</b>        | 3.92 | 2.17 NM_003583.2    | dual-specificity tyrosine-(Y)-phosphorylation regulated kinase 2 (DYRK2)         |
| <b>IFNAR1</b>       | 3.81 | 2.17 NM_000629.2    | interferon (alpha)                                                               |
| <b>PKIA</b>         | 3.81 | 2.17 NM_181839.1    | protein kinase (cAMP-dependent)                                                  |
| <b>ARID5B</b>       | 3.79 | 2.17 NM_032199.1    | AT rich interactive domain 5B (MRF1-like) (ARID5B)                               |
| <b>SLAIN1</b>       | 3.79 | 2.17 NM_001040153.2 | SLAIN motif family                                                               |
| <b>TCEAL1</b>       | 3.79 | 2.17 NM_001006639.1 | transcription elongation factor A (SII)-like 1 (TCEAL1)                          |
| <b>SRPRB</b>        | 3.77 | 2.17 NM_021203.2    | signal recognition particle receptor                                             |
| <b>FAM117B</b>      | 3.52 | 2.17 NM_173511.2    | family with sequence similarity 117                                              |
| <b>F3</b>           | 3.76 | 2.16 NM_001993.2    | coagulation factor III (thromboplastin)                                          |
| <b>FAM102B</b>      | 3.5  | 2.16 NM_001010883.1 | family with sequence similarity 102                                              |
| <b>SLC7A1</b>       | 3.5  | 2.16 NM_003045.3    | solute carrier family 7 (cationic amino acid transporter)                        |
| <b>TNFRSF12A</b>    | 3.5  | 2.16 NM_016639.1    | tumor necrosis factor receptor superfamily                                       |
| <b>LOC100131787</b> | 3.49 | 2.16 XR_039693.1    | PREDICTED: misc_RNA (LOC100131787)                                               |
| <b>PEX11B</b>       | 3.42 | 2.16 NM_003846.1    | peroxisomal biogenesis factor 11 beta (PEX11B)                                   |
| <b>PAPOLA</b>       | 3.03 | 2.16 NM_032632.3    | poly(A) polymerase alpha (PAPOLA)                                                |
| <b>TM2D2</b>        | 4    | 2.14 NM_078473.2    | TM2 domain containing 2 (TM2D2)                                                  |
| <b>FYCO1</b>        | 3.92 | 2.14 NM_024513.1    | FYVE and coiled-coil domain containing 1 (FYCO1)                                 |
| <b>PKIA</b>         | 3.91 | 2.14 NM_006823.2    | protein kinase (cAMP-dependent)                                                  |
| <b>DCTD</b>         | 3.43 | 2.14 NM_001921.2    | dCMP deaminase (DCTD)                                                            |

|                  |      |                     |                                                                                |
|------------------|------|---------------------|--------------------------------------------------------------------------------|
| <b>TSEN34</b>    | 3.42 | 2.14 NM_001077446.1 | tRNA splicing endonuclease 34 homolog (S. cerevisiae) (TSEN34)                 |
| <b>CDKN2C</b>    | 3.3  | 2.14 NM_078626.2    | cyclin-dependent kinase inhibitor 2C (p18)                                     |
| <b>SMS</b>       | 3.01 | 2.14 NM_004595.2    | spermine synthase (SMS)                                                        |
| <b>PLOD2</b>     | 4.12 | 2.13 NM_182943.2    | procollagen-lysine                                                             |
| <b>MAFG</b>      | 3.84 | 2.13 NM_032711.2    | v-maf musculoaponeurotic fibrosarcoma oncogene homolog G (avian) (MAFG)        |
| <b>NMB</b>       | 3.69 | 2.13 NM_021077.3    | neuromedin B (NMB)                                                             |
| <b>PTEN</b>      | 3.65 | 2.13 NM_000314.4    | phosphatase and tensin homolog (PTEN)                                          |
| <b>LOC730990</b> | 3.55 | 2.13 XM_001722060.1 | PREDICTED: hypothetical LOC730990 (LOC730990)                                  |
| <b>IMPDH1</b>    | 3.4  | 2.13 NM_000883.2    | IMP (inosine monophosphate) dehydrogenase 1 (IMPDH1)                           |
| <b>NSMCE1</b>    | 3.39 | 2.13 NM_145080.3    | non-SMC element 1 homolog (S. cerevisiae) (NSMCE1)                             |
| <b>LOC399959</b> | 3.93 | 2.12 NR_024430.1    | hypothetical LOC399959 (LOC399959)                                             |
| <b>FAM54A</b>    | 3.88 | 2.12 NM_001099286.1 | family with sequence similarity 54                                             |
| <b>RTCD1</b>     | 3.75 | 2.12 NM_003729.2    | RNA terminal phosphate cyclase domain 1 (RTCD1)                                |
| <b>RARS2</b>     | 3.73 | 2.12 NM_020320.2    | arginyl-tRNA synthetase 2                                                      |
| <b>ATF4</b>      | 3.5  | 2.12 NM_182810.1    | activating transcription factor 4 (tax-responsive enhancer element B67) (ATF4) |
| <b>CDK6</b>      | 3.34 | 2.12 NM_001259.5    | cyclin-dependent kinase 6 (CDK6)                                               |
| <b>BSCL2</b>     | 3.33 | 2.12 NM_032667.4    | Bernardinelli-Seip congenital lipodystrophy 2 (seipin) (BSCL2)                 |
| <b>TBL1X</b>     | 3.3  | 2.12 NM_005647.2    | transducin (beta)-like 1X-linked (TBL1X)                                       |
| <b>RBM22</b>     | 3.15 | 2.12 NM_018047.1    | RNA binding motif protein 22 (RBM22)                                           |
| <b>JMJD8</b>     | 3.06 | 2.12 NM_001005920.2 | jumonji domain containing 8 (JMJD8)                                            |
| <b>EIF4G2</b>    | 2.63 | 2.12 NM_001418.3    | eukaryotic translation initiation factor 4 gamma                               |
| <b>SERTAD2</b>   | 3.45 | 2.11 NM_014755.1    | SERTA domain containing 2 (SERTAD2)                                            |
| <b>CTBP1</b>     | 3.44 | 2.11 NM_001012614.1 | C-terminal binding protein 1 (CTBP1)                                           |
| <b>TRAPPC1</b>   | 3.33 | 2.11 NM_021210.3    | trafficking protein particle complex 1 (TRAPPC1)                               |
| <b>MCM7</b>      | 3.11 | 2.11 NM_182776.1    | minichromosome maintenance complex component 7 (MCM7)                          |
| <b>CRY2</b>      | 4.17 | 2.1 NM_021117.2     | cryptochrome 2 (photolyase-like) (CRY2)                                        |
| <b>DPP8</b>      | 3.75 | 2.1 NM_130434.3     | dipeptidyl-peptidase 8 (DPP8)                                                  |
| <b>ZFYVE26</b>   | 3.75 | 2.1 NM_015346.2     | zinc finger                                                                    |
| <b>TCEA1</b>     | 3.67 | 2.1 NM_201437.1     | transcription elongation factor A (SII)                                        |
| <b>RNF149</b>    | 3.65 | 2.1 NM_173647.2     | ring finger protein 149 (RNF149)                                               |
| <b>SMAP2</b>     | 3.58 | 2.1 NM_022733.1     | small ArfGAP2 (SMAP2)                                                          |
| <b>BMF</b>       | 3.5  | 2.1 NM_033503.3     | Bcl2 modifying factor (BMF)                                                    |
| <b>WAC</b>       | 3.45 | 2.1 NM_100486.1     | WW domain containing adaptor with coiled-coil (WAC)                            |
| <b>CMPK1</b>     | 3.37 | 2.1 NM_016308.1     | cytidine monophosphate (UMP-CMP) kinase 1                                      |
| <b>ATF4</b>      | 2.37 | 2.1 NM_001675.2     | activating transcription factor 4 (tax-responsive enhancer element B67) (ATF4) |
| <b>URG4</b>      | 4    | 2.09 NM_001077664.1 | up-regulated gene 4 (URG4)                                                     |
| <b>MPZL1</b>     | 3.92 | 2.09 NM_024569.3    | myelin protein zero-like 1 (MPZL1)                                             |
| <b>SYNC1</b>     | 3.8  | 2.09 NM_030786.1    | syncoilin                                                                      |
| <b>HINT3</b>     | 3.27 | 2.09 NM_138571.4    | histidine triad nucleotide binding protein 3 (HINT3)                           |
| <b>MYD88</b>     | 3.89 | 2.08 NM_002468.3    | myeloid differentiation primary response gene (88) (MYD88)                     |
| <b>ARL6IP1</b>   | 3.86 | 2.08 NM_015161.1    | ADP-ribosylation factor-like 6 interacting protein 1 (ARL6IP1)                 |
| <b>PLIN2</b>     | 3.86 | 2.08 NM_001122.2    | perilipin 2 (PLIN2)                                                            |
| <b>ATMIN</b>     | 3.82 | 2.08 NM_015251.2    | ATM interactor (ATMIN)                                                         |
| <b>FAM18B</b>    | 3.72 | 2.08 NM_016078.4    | family with sequence similarity 18                                             |
| <b>EIF5</b>      | 3.53 | 2.08 NM_001969.3    | eukaryotic translation initiation factor 5 (EIF5)                              |
| <b>TSPAN3</b>    | 3.36 | 2.08 NM_005724.4    | tetraspanin 3 (TSPAN3)                                                         |
| <b>QDPR</b>      | 3.23 | 2.08 NM_000320.1    | quinoid dihydropteridine reductase (QDPR)                                      |
| <b>ZFP91</b>     | 3    | 2.08 NM_053023.3    | zinc finger protein 91 homolog (mouse) (ZFP91)                                 |
| <b>ANKFY1</b>    | 3.72 | 2.07 NM_016376.3    | ankyrin repeat and FYVE domain containing 1 (ANKFY1)                           |

|                     |      |                     |                                                                         |
|---------------------|------|---------------------|-------------------------------------------------------------------------|
| <b>BTBD7</b>        | 3.66 | 2.07 NM_001002860.2 | BTB (POZ) domain containing 7 (BTBD7)                                   |
| <b>TOPBP1</b>       | 3.23 | 2.07 NM_007027.2    | topoisomerase (DNA) II binding protein 1 (TOPBP1)                       |
| <b>LSM1</b>         | 2.73 | 2.07 NM_014462.1    | LSM1 homolog                                                            |
| <b>COL4A2</b>       | 4.09 | 2.06 NM_001846.2    | collagen                                                                |
| <b>SPTY2D1</b>      | 3.9  | 2.06 NM_194285.2    | SPT2                                                                    |
| <b>DEDD</b>         | 3.82 | 2.06 NM_001039712.1 | death effector domain containing (DEDD)                                 |
| <b>TMEM170B</b>     | 3.72 | 2.06 NM_001100829.1 | transmembrane protein 170B (TMEM170B)                                   |
| <b>LATS2</b>        | 3.69 | 2.06 NM_014572.2    | LATS                                                                    |
| <b>F3</b>           | 3.64 | 2.06 NM_001993.2    | coagulation factor III (thromboplastin                                  |
| <b>ST6GALNAC6</b>   | 3.6  | 2.06 NM_013443.3    | ST6 (alpha-N-acetyl-neuraminy-2                                         |
| <b>LOC100130775</b> | 3.57 | 2.06 XR_042325.1    | PREDICTED: misc_RNA (LOC100130775)                                      |
| <b>MPP5</b>         | 3.57 | 2.06 NM_022474.2    | membrane protein                                                        |
| <b>MFF</b>          | 3.53 | 2.06 NM_020194.4    | mitochondrial fission factor (MFF)                                      |
| <b>ATG16L1</b>      | 3.33 | 2.06 NM_017974.3    | ATG16 autophagy related 16-like 1 ( <i>S. cerevisiae</i> ) (ATG16L1)    |
| <b>SNX17</b>        | 3.24 | 2.06 NM_014748.2    | sorting nexin 17 (SNX17)                                                |
| <b>NETO2</b>        | 3.19 | 2.06 NM_018092.3    | neuropilin (NRP) and tolloid (TLL)-like 2 (NETO2)                       |
| <b>AP1M1</b>        | 3.11 | 2.06 NM_032493.2    | adaptor-related protein complex 1                                       |
| <b>TMEM41A</b>      | 4.06 | 2.05 NM_080652.2    | transmembrane protein 41A (TMEM41A)                                     |
| <b>LOC100130008</b> | 4.02 | 2.05 XM_001724677.1 | PREDICTED: similar to hCG2024106                                        |
| <b>FAIM3</b>        | 3.99 | 2.05 NM_005449.3    | Fas apoptotic inhibitory molecule 3 (FAIM3)                             |
| <b>VAMP2</b>        | 3.9  | 2.05 NM_014232.1    | vesicle-associated membrane protein 2 (synaptobrevin 2) (VAMP2)         |
| <b>ST6GALNAC4</b>   | 3.35 | 2.05 NM_175039.3    | ST6 (alpha-N-acetyl-neuraminy-2                                         |
| <b>JMJD8</b>        | 3    | 2.05 NM_001005920.2 | jumonji domain containing 8 (JMJD8)                                     |
| <b>C15orf29</b>     | 3.77 | 2.04 NM_024713.1    | chromosome 15 open reading frame 29 (C15orf29)                          |
| <b>NAGK</b>         | 3.72 | 2.04 NM_017567.2    | N-acetylglucosamine kinase (NAGK)                                       |
| <b>ARHGAP12</b>     | 3.66 | 2.04 NM_018287.5    | Rho GTPase activating protein 12 (ARHGAP12)                             |
| <b>LOC646993</b>    | 3.59 | 2.04 XM_001717725.1 | PREDICTED: similar to high-mobility group box 3 (LOC646993)             |
| <b>SH3PXD2A</b>     | 3.5  | 2.04 NM_014631.2    | SH3 and PX domains 2A (SH3PXD2A)                                        |
| <b>WDR59</b>        | 3.42 | 2.04 NM_030581.3    | WD repeat domain 59 (WDR59)                                             |
| <b>LOC100130070</b> | 2.68 | 2.04 XM_001723889.1 | PREDICTED: similar to metalloproteinase (LOC100130070)                  |
| <b>CXCR4</b>        | 3.93 | 2.03 NM_003467.2    | chemokine (C-X-C motif) receptor 4 (CXCR4)                              |
| <b>RGMG</b>         | 3.71 | 2.03 NM_001012761.1 | RGM domain family                                                       |
| <b>MAFG</b>         | 3.65 | 2.03 NM_002359.2    | v-maf musculoaponeurotic fibrosarcoma oncogene homolog G (avian) (MAFG) |
| <b>RCOR3</b>        | 3.55 | 2.03 NM_018254.2    | REST corepressor 3 (RCOR3)                                              |
| <b>TANC1</b>        | 3.55 | 2.03 NM_033394.1    | tetratricopeptide repeat                                                |
| <b>PPP2CB</b>       | 3.52 | 2.03 NM_004156.2    | protein phosphatase 2 (formerly 2A)                                     |
| <b>CPNE1</b>        | 3.46 | 2.03 NM_152931.1    | copine I (CPNE1)                                                        |
| <b>CA12</b>         | 3.41 | 2.03 NM_001218.3    | carbonic anhydrase XII (CA12)                                           |
| <b>ACVR1B</b>       | 3.66 | 2.02 NM_004302.3    | activin A receptor                                                      |
| <b>DICER1</b>       | 3.65 | 2.02 NM_030621.2    | Dicer1                                                                  |
| <b>TMEM9</b>        | 3.45 | 2.02 NM_016456.2    | transmembrane protein 9 (TMEM9)                                         |
| <b>LUM</b>          | 3.44 | 2.02 NM_002345.3    | lumican (LUM)                                                           |
| <b>C19orf22</b>     | 3.35 | 2.02 NM_138774.2    | chromosome 19 open reading frame 22 (C19orf22)                          |
| <b>ZNF211</b>       | 3.89 | 2.01 NM_006385.2    | zinc finger protein 211 (ZNF211)                                        |
| <b>YWHAQ</b>        | 1.97 | 2.01 NM_006826.2    | tyrosine 3-monooxygenase/tryptophan 5-monooxygenase activation protein  |
| <b>TRIM6</b>        | 3.79 | 2 NM_058166.3       | tripartite motif-containing 6 (TRIM6)                                   |
| <b>WDR37</b>        | 3.7  | 2 NM_014023.3       | WD repeat domain 37 (WDR37)                                             |
| <b>LOC728115</b>    | 3.5  | 2 XR_038319.1       | PREDICTED: misc_RNA (LOC728115)                                         |
| <b>SIX4</b>         | 3.42 | 2 NM_017420.3       | SIX homeobox 4 (SIX4)                                                   |



|                  |      |                     |                                                                       |
|------------------|------|---------------------|-----------------------------------------------------------------------|
| <b>PRNP</b>      | 3.28 | 2 NM_001080121.1    | prion protein (PRNP)                                                  |
| <b>FAM3A</b>     | 3.17 | 2 NM_021806.1       | family with sequence similarity 3                                     |
| <b>RAB23</b>     | 3.12 | 2 NM_016277.3       | RAB23                                                                 |
| <b>PLEKHA2</b>   | 2.99 | 2 NM_021623.1       | pleckstrin homology domain containing                                 |
| <b>MARCKS</b>    | 2.62 | 2 NM_002356.5       | myristoylated alanine-rich protein kinase C substrate (MARCKS)        |
| <b>MAPRE3</b>    | 3.81 | 1.99 NM_012326.2    | microtubule-associated protein                                        |
| <b>C2orf42</b>   | 3.48 | 1.99 NM_017880.1    | chromosome 2 open reading frame 42 (C2orf42)                          |
| <b>ZFYVE19</b>   | 3.45 | 1.99 NM_001077268.1 | zinc finger                                                           |
| <b>BRI3BP</b>    | 3.43 | 1.99 XM_941876.1    | PREDICTED: BRI3 binding protein (BRI3BP)                              |
| <b>PPCS</b>      | 3.33 | 1.99 NM_001077447.1 | phosphopantothencycysteine synthetase (PPCS)                          |
| <b>URG4</b>      | 3.69 | 1.98 NM_017920.3    | up-regulated gene 4 (URG4)                                            |
| <b>G6PD</b>      | 3.47 | 1.98 NM_000402.3    | glucose-6-phosphate dehydrogenase (G6PD)                              |
| <b>RAB6A</b>     | 3.38 | 1.98 NM_002869.4    | RAB6A                                                                 |
| <b>HSD17B11</b>  | 3.36 | 1.98 NM_016245.2    | hydroxysteroid (17-beta) dehydrogenase 11 (HSD17B11)                  |
| <b>CISD2</b>     | 3.34 | 1.98 NM_001008388.1 | CDGSH iron sulfur domain 2 (CISD2)                                    |
| <b>ARL8B</b>     | 3.03 | 1.98 NM_018184.2    | ADP-ribosylation factor-like 8B (ARL8B)                               |
| <b>CHES1</b>     | 3.03 | 1.98 NM_005197.2    | checkpoint suppressor 1 (CHES1)                                       |
| <b>PRMT6</b>     | 2.62 | 1.98 NM_018137.1    | protein arginine methyltransferase 6 (PRMT6)                          |
| <b>TNFRSF10D</b> | 3.8  | 1.97 NM_003840.3    | tumor necrosis factor receptor superfamily                            |
| <b>DNAJC27</b>   | 3.72 | 1.97 NM_016544.1    | DnaJ (Hsp40) homolog                                                  |
| <b>ITGA11</b>    | 3.56 | 1.97 NM_001004439.1 | integrin                                                              |
| <b>USP21</b>     | 3.52 | 1.97 NM_012475.4    | ubiquitin specific peptidase 21 (USP21)                               |
| <b>CCNE1</b>     | 3.37 | 1.97 NM_001238.1    | cyclin E1 (CCNE1)                                                     |
| <b>MOCOS</b>     | 3.37 | 1.97 NM_017947.1    | molybdenum cofactor sulfurase (MOCOS)                                 |
| <b>DOCK10</b>    | 3.34 | 1.97 NM_014689.2    | dedicator of cytokinesis 10 (DOCK10)                                  |
| <b>BTG3</b>      | 3.31 | 1.97 NM_006806.3    | BTG family                                                            |
| <b>GPT2</b>      | 3.3  | 1.97 NM_133443.1    | glutamic pyruvate transaminase (alanine aminotransferase) 2 (GPT2)    |
| <b>PHLDA1</b>    | 3.26 | 1.97 NM_007350.3    | pleckstrin homology-like domain                                       |
| <b>HNRPDL</b>    | 3.21 | 1.97 NM_031372.1    | heterogeneous nuclear ribonucleoprotein D-like (HNRPDL)               |
| <b>ZDHHC6</b>    | 3.02 | 1.97 NM_022494.1    | zinc finger                                                           |
| <b>KIAA1797</b>  | 3.5  | 1.96 NM_017794.2    | KIAA1797 (KIAA1797)                                                   |
| <b>ATPAF1</b>    | 3.49 | 1.96 NM_001042546.1 | ATP synthase mitochondrial F1 complex assembly factor 1 (ATPAF1)      |
| <b>MKRN2</b>     | 3.27 | 1.96 NM_014160.3    | makorin ring finger protein 2 (MKRN2)                                 |
| <b>CNIH</b>      | 3.24 | 1.96 NM_005776.2    | cornichon homolog (Drosophila) (CNIH)                                 |
| <b>UBE2J1</b>    | 3.22 | 1.96 NM_016021.2    | ubiquitin-conjugating enzyme E2                                       |
| <b>NUDT21</b>    | 3.1  | 1.96 NM_007006.2    | nudix (nucleoside diphosphate linked moiety X)-type motif 21 (NUDT21) |
| <b>ADAM15</b>    | 2.98 | 1.96 NM_207195.1    | ADAM metallopeptidase domain 15 (ADAM15)                              |
| <b>B4GALT5</b>   | 2.98 | 1.96 NM_004776.2    | UDP-Gal:betaGlcNAc beta 1                                             |
| <b>FAM189B</b>   | 2.98 | 1.96 NM_006589.2    | family with sequence similarity 189                                   |
| <b>FGF2</b>      | 2.95 | 1.96 NM_002006.3    | fibroblast growth factor 2 (basic) (FGF2)                             |
| <b>UBAP1</b>     | 2.84 | 1.96 NM_016525.3    | ubiquitin associated protein 1 (UBAP1)                                |
| <b>DCBLD2</b>    | 2.83 | 1.96 NM_080927.3    | discoidin                                                             |
| <b>TBC1D20</b>   | 3.68 | 1.95 NM_144628.1    | TBC1 domain family                                                    |
| <b>SLC40A1</b>   | 3.58 | 1.95 NM_014585.3    | solute carrier family 40 (iron-regulated transporter)                 |
| <b>HABP4</b>     | 3.51 | 1.95 NM_014282.1    | hyaluronan binding protein 4 (HABP4)                                  |
| <b>MRPL10</b>    | 3.33 | 1.95 NM_145255.2    | mitochondrial ribosomal protein L10 (MRPL10)                          |
| <b>FEZ2</b>      | 3.28 | 1.95 NM_005102.2    | fasciculation and elongation protein zeta 2 (zygin II) (FEZ2)         |
| <b>VPS24</b>     | 3.23 | 1.95 NM_001005753.1 | vacuolar protein sorting 24 homolog (S. cerevisiae) (VPS24)           |
| <b>LYN</b>       | 3.12 | 1.95 NM_002350.1    | v-yes-1 Yamaguchi sarcoma viral related oncogene homolog (LYN)        |

|              |      |                     |                                                                      |
|--------------|------|---------------------|----------------------------------------------------------------------|
| LOC645944    | 3.78 | 1.94 XR_015802.1    | PREDICTED: misc_RNA (LOC645944)                                      |
| ACD          | 3.53 | 1.94 NM_022914.2    | adrenocortical dysplasia homolog (mouse) (ACD)                       |
| ZFP1         | 3.49 | 1.94 NM_153688.2    | zinc finger protein 1 homolog (mouse) (ZFP1)                         |
| ZNF532       | 3.42 | 1.94 NM_018181.4    | zinc finger protein 532 (ZNF532)                                     |
| CNOT4        | 3.41 | 1.94 NM_013316.2    | CCR4-NOT transcription complex                                       |
| RAB6A        | 3.26 | 1.94 NM_198896.1    | RAB6A                                                                |
| TCEB1        | 3.05 | 1.94 NM_005648.2    | transcription elongation factor B (SIII)                             |
| NDUFA9       | 2.91 | 1.94 NM_005002.3    | NADH dehydrogenase (ubiquinone) 1 alpha subcomplex                   |
| BNIP1        | 3.69 | 1.93 NM_013979.1    | BCL2/adenovirus E1B 19kDa interacting protein 1 (BNIP1)              |
| SIRPA        | 3.54 | 1.93 NM_001040023.1 | signal-regulatory protein alpha (SIRPA)                              |
| KLHL5        | 3.48 | 1.93 NM_001007075.1 | kelch-like 5 (Drosophila) (KLHL5)                                    |
| PDGFD        | 3.39 | 1.93 NM_033135.3    | platelet derived growth factor D (PDGFD)                             |
| CD163L1      | 3.38 | 1.93 NM_174941.4    | CD163 molecule-like 1 (CD163L1)                                      |
| LOC100131572 | 3.26 | 1.93 XM_001725183.1 | PREDICTED: similar to hCG1783679 (LOC100131572)                      |
| ST6GALNAC4   | 2.98 | 1.93 NM_175039.3    | ST6 (alpha-N-acetyl-neuraminyl-2                                     |
| PRMT6        | 2.71 | 1.93 NM_018137.1    | protein arginine methyltransferase 6 (PRMT6)                         |
| TBPL1        | 2.66 | 1.93 NM_004865.2    | TBP-like 1 (TBPL1)                                                   |
| LAPTM4B      | 2.47 | 1.93 NM_018407.4    | lysosomal protein transmembrane 4 beta (LAPTM4B)                     |
| LOC389641    | 3.43 | 1.92 XM_944097.2    | PREDICTED: hypothetical gene supported by AK124295 (LOC389641)       |
| ZNF800       | 3.36 | 1.92 NM_176814.3    | zinc finger protein 800 (ZNF800)                                     |
| SEC22C       | 3.25 | 1.92 NM_004206.2    | SEC22 vesicle trafficking protein homolog C (S. cerevisiae) (SEC22C) |
| NIPA1        | 3.2  | 1.92 NM_144599.3    | non imprinted in Prader-Willi/Angelman syndrome 1 (NIPA1)            |
| ZC3H12C      | 3.12 | 1.92 NM_033390.1    | zinc finger CCCH-type containing 12C (ZC3H12C)                       |
| LTV1         | 3.07 | 1.92 NM_032860.3    | LTV1 homolog (S. cerevisiae) (LTV1)                                  |
| NR4A2        | 3.07 | 1.92 NM_006186.2    | nuclear receptor subfamily 4                                         |
| DLEU1        | 3.04 | 1.92 NR_002605.1    | deleted in lymphocytic leukemia 1 (non-protein coding) (DLEU1)       |
| RHOB         | 2.88 | 1.92 NM_004040.2    | ras homolog gene family                                              |
| CST3         | 2.79 | 1.92 NM_000099.2    | cystatin C (CST3)                                                    |
| SEC22A       | 3.48 | 1.91 NM_012430.3    | SEC22 vesicle trafficking protein homolog A (S. cerevisiae) (SEC22A) |
| ZNF280B      | 3.48 | 1.91 NM_080764.2    | zinc finger protein 280B (ZNF280B)                                   |
| TRIP10       | 3.42 | 1.91 NM_004240.2    | thyroid hormone receptor interactor 10 (TRIP10)                      |
| ZNHIT6       | 3.38 | 1.91 NM_017953.2    | zinc finger                                                          |
| GNA11        | 3.36 | 1.91 NM_002067.1    | guanine nucleotide binding protein (G protein)                       |
| UFSP2        | 3.31 | 1.91 NM_018359.1    | UFM1-specific peptidase 2 (UFSP2)                                    |
| UBL3         | 3.12 | 1.91 NM_007106.2    | ubiquitin-like 3 (UBL3)                                              |
| AMMECR1      | 2.81 | 1.91 NM_015365.2    | Alport syndrome                                                      |
| HIF1A        | 2.63 | 1.91 NM_181054.1    | hypoxia-inducible factor 1                                           |
| BHLHB2       | 2.32 | 1.91 NM_003670.1    | basic helix-loop-helix domain containing                             |
| SLC35B3      | 3.57 | 1.9 NM_015948.2     | solute carrier family 35                                             |
| LOC729580    | 3.56 | 1.9 XM_001130700.1  | PREDICTED: hypothetical LOC729580 (LOC729580)                        |
| PDZD8        | 3.5  | 1.9 NM_173791.3     | PDZ domain containing 8 (PDZD8)                                      |
| NELL2        | 3.44 | 1.9 NM_006159.1     | NEL-like 2 (chicken) (NELL2)                                         |
| C3orf38      | 3.33 | 1.9 NM_173824.2     | chromosome 3 open reading frame 38 (C3orf38)                         |
| CSNK1A1      | 3.3  | 1.9 NM_001025105.1  | casein kinase 1                                                      |
| ACVR1        | 3.08 | 1.9 NM_001105.2     | activin A receptor                                                   |
| USP8         | 2.96 | 1.9 NM_005154.2     | ubiquitin specific peptidase 8 (USP8)                                |
| SIK1         | 2.87 | 1.9 NM_173354.3     | salt-inducible kinase 1 (SIK1)                                       |
| INO80        | 3.61 | 1.89 NM_017553.1    | INO80 homolog (S. cerevisiae) (INO80)                                |
| ITGA11       | 3.58 | 1.89 NM_012211.3    | integrin                                                             |

|                     |      |      |                |                                                                                             |
|---------------------|------|------|----------------|---------------------------------------------------------------------------------------------|
| <b>FAM43A</b>       | 3.53 | 1.89 | NM_153690.4    | family with sequence similarity 43                                                          |
| <b>ASAP1</b>        | 3.27 | 1.89 | NM_018482.2    | ArfGAP with SH3 domain                                                                      |
| <b>PHF12</b>        | 3.24 | 1.89 | NM_001033561.1 | PHD finger protein 12 (PHF12)                                                               |
| <b>TOMM70A</b>      | 3.06 | 1.89 | NM_014820.3    | translocase of outer mitochondrial membrane 70 homolog A ( <i>S. cerevisiae</i> ) (TOMM70A) |
| <b>NUFIP2</b>       | 3.01 | 1.89 | NM_020772.1    | nuclear fragile X mental retardation protein interacting protein 2 (NUFIP2)                 |
| <b>C8orf76</b>      | 2.92 | 1.89 | NM_032847.1    | chromosome 8 open reading frame 76 (C8orf76)                                                |
| <b>SHOC2</b>        | 2.92 | 1.89 | NM_007373.2    | soc-2 suppressor of clear homolog ( <i>C. elegans</i> ) (SHOC2)                             |
| <b>ADSS</b>         | 2.71 | 1.89 | NM_001126.2    | adenylosuccinate synthase (ADSS)                                                            |
| <b>FLJ42627</b>     | 3.51 | 1.88 | NR_024492.1    | hypothetical LOC645644 (FLJ42627)                                                           |
| <b>ITGB4</b>        | 3.43 | 1.88 | NM_001005619.1 | integrin                                                                                    |
| <b>C18orf21</b>     | 3.23 | 1.88 | NM_031446.3    | chromosome 18 open reading frame 21 (C18orf21)                                              |
| <b>BICD2</b>        | 3.12 | 1.88 | NM_001003800.1 | bicaudal D homolog 2 ( <i>Drosophila</i> ) (BICD2)                                          |
| <b>AKTIP</b>        | 3.11 | 1.88 | NM_001012398.1 | AKT interacting protein (AKTIP)                                                             |
| <b>PPCS</b>         | 3.07 | 1.88 | NM_024664.2    | phosphopantothienoylcysteine synthetase (PPCS)                                              |
| <b>MRPL43</b>       | 3.06 | 1.88 | NM_032112.2    | mitochondrial ribosomal protein L43 (MRPL43)                                                |
| <b>LOC642755</b>    | 2.64 | 1.88 | XM_926382.2    | PREDICTED: similar to DEX1                                                                  |
| <b>EIF3F</b>        | 2.21 | 1.88 | NM_003754.2    | eukaryotic translation initiation factor 3                                                  |
| <b>CASP2</b>        | 3.55 | 1.87 | NM_032983.2    | caspase 2                                                                                   |
| <b>PANX2</b>        | 3.34 | 1.87 | NM_052839.2    | pannexin 2 (PANX2)                                                                          |
| <b>LOC100134108</b> | 3.09 | 1.87 | XM_001713975.1 | PREDICTED: similar to succinate dehydrogenase complex                                       |
| <b>ITSN1</b>        | 2.98 | 1.87 | NM_001001132.1 | intersectin 1 (SH3 domain protein) (ITSN1)                                                  |
| <b>PCMTD1</b>       | 2.95 | 1.87 | NM_052937.1    | protein-L-isoaspartate (D-aspartate) O-methyltransferase domain containing 1 (PCMTD1)       |
| <b>TIMM23</b>       | 2.93 | 1.87 | NM_006327.2    | translocase of inner mitochondrial membrane 23 homolog (yeast) (TIMM23)                     |
| <b>PTP4A1</b>       | 2.89 | 1.87 | NM_003463.3    | protein tyrosine phosphatase type IVA                                                       |
| <b>ARF5</b>         | 2.64 | 1.87 | NM_001662.2    | ADP-ribosylation factor 5 (ARF5)                                                            |
| <b>ALDH3A2</b>      | 2.54 | 1.87 | NM_000382.2    | aldehyde dehydrogenase 3 family                                                             |
| <b>MGST1</b>        | 2.31 | 1.87 | NM_145792.1    | microsomal glutathione S-transferase 1 (MGST1)                                              |
| <b>MCART1</b>       | 3.47 | 1.86 | NM_033412.2    | mitochondrial carrier triple repeat 1 (MCART1)                                              |
| <b>RNF216</b>       | 3.37 | 1.86 | NM_207111.2    | ring finger protein 216 (RNF216)                                                            |
| <b>PURA</b>         | 3.16 | 1.86 | NM_005859.3    | purine-rich element binding protein A (PURA)                                                |
| <b>DBNDD1</b>       | 3.11 | 1.86 | NM_001042610.1 | dysbindin (dystrobrevin binding protein 1) domain containing 1 (DBNDD1)                     |
| <b>TBP</b>          | 3.02 | 1.86 | NM_003194.3    | TATA box binding protein (TBP)                                                              |
| <b>FAM45A</b>       | 3.01 | 1.86 | NM_207009.2    | family with sequence similarity 45                                                          |
| <b>LCMT1</b>        | 2.95 | 1.86 | NM_001032391.1 | leucine carboxyl methyltransferase 1 (LCMT1)                                                |
| <b>B4GALT3</b>      | 2.87 | 1.86 | NM_003779.2    | UDP-Gal:betaGlcNAc beta 1                                                                   |
| <b>SLC35B1</b>      | 2.59 | 1.86 | NM_005827.1    | solute carrier family 35                                                                    |
| <b>NFIB</b>         | 2.37 | 1.86 | NM_005596.2    | nuclear factor I/B (NFIB)                                                                   |
| <b>MMD</b>          | 2.3  | 1.86 | NM_012329.2    | monocyte to macrophage differentiation-associated (MMD)                                     |
| <b>NHLRC3</b>       | 3.42 | 1.85 | NM_001017370.1 | NHL repeat containing 3 (NHLRC3)                                                            |
| <b>PIGK</b>         | 3.35 | 1.85 | NM_005482.2    | phosphatidylinositol glycan anchor biosynthesis                                             |
| <b>AP4B1</b>        | 3.03 | 1.85 | NM_006594.1    | adaptor-related protein complex 4                                                           |
| <b>SLC25A10</b>     | 3.03 | 1.85 | NM_012140.3    | solute carrier family 25 (mitochondrial carrier; dicarboxylate transporter)                 |
| <b>AURKB</b>        | 2.79 | 1.85 | NM_004217.2    | aurora kinase B (AURKB)                                                                     |
| <b>C12orf44</b>     | 2.79 | 1.85 | NM_001098673.1 | chromosome 12 open reading frame 44 (C12orf44)                                              |
| <b>RPS6KA2</b>      | 2.69 | 1.85 | NM_001006932.1 | ribosomal protein S6 kinase                                                                 |
| <b>SMAD5</b>        | 2.68 | 1.85 | NM_005903.5    | SMAD family member 5 (SMAD5)                                                                |
| <b>CDKN2B</b>       | 2.49 | 1.85 | NM_078487.2    | cyclin-dependent kinase inhibitor 2B (p15)                                                  |
| <b>LAPTM4B</b>      | 2.26 | 1.85 | NM_018407.4    | lysosomal protein transmembrane 4 beta (LAPTM4B)                                            |
| <b>CYB5R3</b>       | 2.13 | 1.85 | NM_007326.2    | cytochrome b5 reductase 3 (CYB5R3)                                                          |

|                     |      |                     |                                                                                                 |
|---------------------|------|---------------------|-------------------------------------------------------------------------------------------------|
| <b>MIR98</b>        | 3.54 | 1.84 NR_029513.1    | microRNA 98 (MIR98)                                                                             |
| <b>MAPK1</b>        | 3.51 | 1.84 NM_002745.4    | mitogen-activated protein kinase 1 (MAPK1)                                                      |
| <b>UVRAG</b>        | 3.32 | 1.84 NM_003369.3    | UV radiation resistance associated gene (UVRAG)                                                 |
| <b>LOC728457</b>    | 3.21 | 1.84 XR_037027.1    | PREDICTED: misc_RNA (LOC728457)                                                                 |
| <b>MYST3</b>        | 3.18 | 1.84 NM_006766.2    | MYST histone acetyltransferase (monocytic leukemia) 3 (MYST3)                                   |
| <b>ARHGAP1</b>      | 3.07 | 1.84 NM_004308.2    | Rho GTPase activating protein 1 (ARHGAP1)                                                       |
| <b>PPFIA1</b>       | 2.9  | 1.84 NM_003626.2    | protein tyrosine phosphatase                                                                    |
| <b>LARP4</b>        | 2.89 | 1.84 NM_052879.3    | La ribonucleoprotein domain family                                                              |
| <b>NFATC2IP</b>     | 2.84 | 1.84 NM_032815.3    | nuclear factor of activated T-cells                                                             |
| <b>MEX3C</b>        | 2.81 | 1.84 NM_016626.3    | mex-3 homolog C (C. elegans) (MEX3C)                                                            |
| <b>TSG101</b>       | 2.81 | 1.84 NM_006292.2    | tumor susceptibility gene 101 (TSG101)                                                          |
| <b>ITM2B</b>        | 2.76 | 1.84 NM_021999.2    | integral membrane protein 2B (ITM2B)                                                            |
| <b>TAOK1</b>        | 2.73 | 1.84 NM_020791.1    | TAO kinase 1 (TAOK1)                                                                            |
| <b>LBH</b>          | 2.41 | 1.84 NM_030915.1    | PREDICTED: hypothetical protein DKFZp566J091 (LBH)                                              |
| <b>PIGY</b>         | 2.34 | 1.84 NM_001042616.1 | phosphatidylinositol glycan anchor biosynthesis                                                 |
| <b>KLHL21</b>       | 3.37 | 1.83 NM_014851.2    | kelch-like 21 (Drosophila) (KLHL21)                                                             |
| <b>LRRC8D</b>       | 3.11 | 1.83 NM_018103.3    | leucine rich repeat containing 8 family                                                         |
| <b>FBXL18</b>       | 3.01 | 1.83 NM_024963.4    | F-box and leucine-rich repeat protein 18 (FBXL18)                                               |
| <b>NPEPPS</b>       | 2.92 | 1.83 NM_006310.2    | aminopeptidase puromycin sensitive (NPEPPS)                                                     |
| <b>RAB24</b>        | 2.89 | 1.83 NM_001031677.2 | RAB24                                                                                           |
| <b>ARMC10</b>       | 2.82 | 1.83 NM_031905.2    | armadillo repeat containing 10 (ARMC10)                                                         |
| <b>CCNB1</b>        | 2.76 | 1.83 NM_031966.2    | cyclin B1 (CCNB1)                                                                               |
| <b>PLSCR3</b>       | 2.67 | 1.83 NM_020360.2    | phospholipid scramblase 3 (PLSCR3)                                                              |
| <b>DNAJC30</b>      | 3.47 | 1.82 NM_032317.2    | DnaJ (Hsp40) homolog                                                                            |
| <b>MASTL</b>        | 3.43 | 1.82 NM_032844.1    | microtubule associated serine/threonine kinase-like (MASTL)                                     |
| <b>SNX12</b>        | 3.3  | 1.82 NM_013346.2    | sorting nexin 12 (SNX12)                                                                        |
| <b>LOC100128585</b> | 3.25 | 1.82 XR_039418.1    | PREDICTED: misc_RNA (LOC100128585)                                                              |
| <b>SLC38A6</b>      | 3.25 | 1.82 NM_153811.1    | solute carrier family 38                                                                        |
| <b>TES</b>          | 3.2  | 1.82 NM_152829.1    | testis derived transcript (3 LIM domains) (TES)                                                 |
| <b>AKAP11</b>       | 3.18 | 1.82 NM_016248.2    | A kinase (PRKA) anchor protein 11 (AKAP11)                                                      |
| <b>C2orf29</b>      | 2.81 | 1.82 NM_017546.3    | chromosome 2 open reading frame 29 (C2orf29)                                                    |
| <b>DAB2</b>         | 2.74 | 1.82 NM_001343.2    | disabled homolog 2                                                                              |
| <b>UCHL3</b>        | 2.71 | 1.82 NM_006002.3    | ubiquitin carboxyl-terminal esterase L3 (ubiquitin thiolesterase) (UCHL3)                       |
| <b>PPP6C</b>        | 2.43 | 1.82 NM_002721.3    | protein phosphatase 6                                                                           |
| <b>AIDA</b>         | 1.95 | 1.82 NM_022831.2    | axin interactor                                                                                 |
| <b>ATP2C1</b>       | 3.34 | 1.81 NM_014382.2    | ATPase                                                                                          |
| <b>SLC35C2</b>      | 3.29 | 1.81 NM_173073.2    | solute carrier family 35                                                                        |
| <b>MOBK1B</b>       | 3.23 | 1.81 NM_018221.1    | MOB1                                                                                            |
| <b>EIF2AK1</b>      | 3.17 | 1.81 NM_001134335.1 | eukaryotic translation initiation factor 2-alpha kinase 1 (EIF2AK1)                             |
| <b>AFG3L1</b>       | 3.12 | 1.81 NM_001031805.1 | AFG3 ATPase family gene 3-like 1 (S. cerevisiae) (AFG3L1)                                       |
| <b>DPH5</b>         | 3.1  | 1.81 NM_001077394.1 | DPH5 homolog (S. cerevisiae) (DPH5)                                                             |
| <b>ZFYVE21</b>      | 3.09 | 1.81 NM_024071.2    | zinc finger                                                                                     |
| <b>HES1</b>         | 3.04 | 1.81 NM_005524.2    | hairy and enhancer of split 1                                                                   |
| <b>TRIM4</b>        | 3.02 | 1.81 NM_033091.1    | tripartite motif-containing 4 (TRIM4)                                                           |
| <b>ANKRD13C</b>     | 3.01 | 1.81 NM_030816.2    | ankyrin repeat domain 13C (ANKRD13C)                                                            |
| <b>LOC652864</b>    | 2.97 | 1.81 XM_942571.1    | PREDICTED: similar to Mitochondrial import inner membrane translocase subunit Tim23 (LOC652864) |
| <b>FAM50B</b>       | 2.95 | 1.81 NM_012135.1    | family with sequence similarity 50                                                              |
| <b>GRB10</b>        | 2.73 | 1.81 NM_001001555.1 | growth factor receptor-bound protein 10 (GRB10)                                                 |
| <b>ITPA</b>         | 2.69 | 1.81 NM_033453.2    | inosine triphosphatase (nucleoside triphosphate pyrophosphatase) (ITPA)                         |

|                     |      |                     |                                                                         |
|---------------------|------|---------------------|-------------------------------------------------------------------------|
| <b>ACTL6A</b>       | 2.66 | 1.81 NM_177989.2    | actin-like 6A (ACTL6A)                                                  |
| <b>VPS26A</b>       | 2.53 | 1.81 NM_001035260.1 | vacuolar protein sorting 26 homolog A (S. pombe) (VPS26A)               |
| <b>RFX5</b>         | 2.46 | 1.81 NM_001025603.1 | regulatory factor X                                                     |
| <b>STAG3</b>        | 3.4  | 1.8 NM_012447.2     | stromal antigen 3 (STAG3)                                               |
| <b>RSC1A1</b>       | 3.3  | 1.8 NM_006511.1     | regulatory solute carrier protein                                       |
| <b>C19orf40</b>     | 3.24 | 1.8 NM_152266.1     | chromosome 19 open reading frame 40 (C19orf40)                          |
| <b>DPH5</b>         | 3.12 | 1.8 NM_001077395.1  | DPH5 homolog (S. cerevisiae) (DPH5)                                     |
| <b>CUTL1</b>        | 3.11 | 1.8 NM_181552.1     | cut-like 1                                                              |
| <b>UNKL</b>         | 3.11 | 1.8 NM_023076.3     | unkempt homolog (Drosophila)-like (UNKL)                                |
| <b>TUSC3</b>        | 2.81 | 1.8 NM_006765.2     | tumor suppressor candidate 3 (TUSC3)                                    |
| <b>PCID2</b>        | 2.37 | 1.8 NM_018386.1     | PCI domain containing 2 (PCID2)                                         |
| <b>EPC2</b>         | 3.3  | 1.79 NM_015630.2    | enhancer of polycomb homolog 2 (Drosophila) (EPC2)                      |
| <b>FAM89A</b>       | 3.28 | 1.79 NM_198552.1    | family with sequence similarity 89                                      |
| <b>ABCB9</b>        | 3.26 | 1.79 NM_019624.2    | ATP-binding cassette                                                    |
| <b>NPHP3</b>        | 3.2  | 1.79 NM_153240.3    | nephronophthisis 3 (adolescent) (NPHP3)                                 |
| <b>PLAG1</b>        | 3.18 | 1.79 NM_002655.1    | pleiomorphic adenoma gene 1 (PLAG1)                                     |
| <b>SLC39A6</b>      | 3.16 | 1.79 NM_012319.2    | solute carrier family 39 (zinc transporter)                             |
| <b>KCTD10</b>       | 3.07 | 1.79 NM_031954.3    | potassium channel tetramerisation domain containing 10 (KCTD10)         |
| <b>HIF1AN</b>       | 3.05 | 1.79 NM_017902.2    | hypoxia inducible factor 1                                              |
| <b>FAM119A</b>      | 3.03 | 1.79 NM_145280.3    | family with sequence similarity 119                                     |
| <b>ATP6V0D1</b>     | 2.82 | 1.79 NM_004691.4    | ATPase                                                                  |
| <b>LOC645381</b>    | 2.77 | 1.79 XR_038557.1    | PREDICTED: misc_RNA (LOC645381)                                         |
| <b>LOC728755</b>    | 2.74 | 1.79 XM_001128377.2 | PREDICTED: similar to hCG1984907 (LOC728755)                            |
| <b>BTF3L4</b>       | 2.66 | 1.79 NM_152265.2    | basic transcription factor 3-like 4 (BTF3L4)                            |
| <b>C2orf28</b>      | 2.49 | 1.79 NM_080592.2    | chromosome 2 open reading frame 28 (C2orf28)                            |
| <b>STK4</b>         | 2.4  | 1.79 NM_006282.2    | serine/threonine kinase 4 (STK4)                                        |
| <b>LAPTM4A</b>      | 3.12 | 1.78 NM_014713.3    | lysosomal-associated protein transmembrane 4 alpha (LAPTM4A)            |
| <b>C21orf63</b>     | 2.94 | 1.78 NM_058187.3    | chromosome 21 open reading frame 63 (C21orf63)                          |
| <b>DSCR3</b>        | 2.91 | 1.78 NM_006052.1    | Down syndrome critical region gene 3 (DSCR3)                            |
| <b>ITPA</b>         | 2.86 | 1.78 NM_033453.2    | inosine triphosphatase (nucleoside triphosphate pyrophosphatase) (ITPA) |
| <b>C5orf13</b>      | 1.93 | 1.78 NM_004772.1    | chromosome 5 open reading frame 13 (C5orf13)                            |
| <b>TSC22D1</b>      | 1.62 | 1.78 NM_006022.2    | TSC22 domain family                                                     |
| <b>LOC100130255</b> | 3.29 | 1.77 XM_001726456.1 | PREDICTED: hypothetical LOC100130255 (LOC100130255)                     |
| <b>OSR2</b>         | 3.19 | 1.77 XM_001126824.1 | PREDICTED: odd-skipped related 2 (Drosophila) (OSR2)                    |
| <b>RUNX2</b>        | 3.16 | 1.77 NM_001024630.2 | runt-related transcription factor 2 (RUNX2)                             |
| <b>C7orf43</b>      | 3.13 | 1.77 NM_018275.3    | chromosome 7 open reading frame 43 (C7orf43)                            |
| <b>SRPK1</b>        | 2.69 | 1.77 NM_003137.3    | SFRS protein kinase 1 (SRPK1)                                           |
| <b>DUSP22</b>       | 2.56 | 1.77 XM_941691.1    | dual specificity phosphatase 22 (DUSP22)                                |
| <b>CCM2</b>         | 2.45 | 1.77 NM_001029835.1 | cerebral cavernous malformation 2 (CCM2)                                |
| <b>FADS1</b>        | 2.39 | 1.77 NM_013402.3    | fatty acid desaturase 1 (FADS1)                                         |
| <b>NME4</b>         | 2.3  | 1.77 NM_005009.2    | non-metastatic cells 4                                                  |
| <b>CCDC6</b>        | 1.97 | 1.77 NM_005436.2    | coiled-coil domain containing 6 (CCDC6)                                 |
| <b>GPX1</b>         | 1.81 | 1.77 NM_201397.1    | glutathione peroxidase 1 (GPX1)                                         |
| <b>SLC25A42</b>     | 3.32 | 1.76 NM_178526.1    | solute carrier family 25                                                |
| <b>ARL4A</b>        | 3.23 | 1.76 NM_001037164.1 | ADP-ribosylation factor-like 4A (ARL4A)                                 |
| <b>LOC644124</b>    | 3.22 | 1.76 XR_017531.2    | PREDICTED: misc_RNA (LOC644124)                                         |
| <b>MED9</b>         | 3.2  | 1.76 NM_018019.2    | mediator complex subunit 9 (MED9)                                       |
| <b>MRPL30</b>       | 3.18 | 1.76 NM_145212.2    | mitochondrial ribosomal protein L30 (MRPL30)                            |
| <b>SECISBP2L</b>    | 2.99 | 1.76 NM_014701.2    | SECIS binding protein 2-like (SECISBP2L)                                |

|              |      |                     |                                                                        |
|--------------|------|---------------------|------------------------------------------------------------------------|
| YDJC         | 2.99 | 1.76 NM_001017964.1 | YdjC homolog (bacterial) (YDJC)                                        |
| TMEM48       | 2.94 | 1.76 NM_018087.3    | transmembrane protein 48 (TMEM48)                                      |
| CAMSAP1      | 2.84 | 1.76 NM_015447.1    | calmodulin regulated spectrin-associated protein 1 (CAMSAP1)           |
| RFC5         | 2.69 | 1.76 NM_007370.3    | replication factor C (activator 1) 5                                   |
| SLC35B2      | 2.51 | 1.76 NM_178148.1    | solute carrier family 35                                               |
| MBNL2        | 2.47 | 1.76 NM_207304.1    | muscleblind-like 2 (Drosophila) (MBNL2)                                |
| ZDHHC6       | 2.47 | 1.76 NM_022494.1    | zinc finger                                                            |
| ZC3H11B      | 2.22 | 1.76 XR_041767.1    | PREDICTED: misc_RNA (ZC3H11B)                                          |
| RNF170       | 3.18 | 1.75 NM_030954.2    | ring finger protein 170 (RNF170)                                       |
| MEX3D        | 3.02 | 1.75 NM_001085363.1 | mex-3 homolog D (C. elegans) (MEX3D)                                   |
| RRP1B        | 2.91 | 1.75 NM_015056.2    | ribosomal RNA processing 1 homolog B (S. cerevisiae) (RRP1B)           |
| SERPINB1     | 2.89 | 1.75 NM_030666.2    | serpin peptidase inhibitor                                             |
| DCAF7        | 2.87 | 1.75 NM_005828.3    | DDB1 and CUL4 associated factor 7 (DCAF7)                              |
| SLC35E1      | 2.85 | 1.75 NM_024881.3    | solute carrier family 35                                               |
| CAPZA1       | 2.76 | 1.75 NM_006135.1    | capping protein (actin filament) muscle Z-line                         |
| PIP4K2A      | 2.63 | 1.75 NM_005028.4    | phosphatidylinositol-5-phosphate 4-kinase                              |
| GRPEL2       | 2.56 | 1.75 NM_152407.3    | GrpE-like 2                                                            |
| SFXN5        | 3.26 | 1.74 NM_144579.1    | sideroflexin 5 (SFXN5)                                                 |
| WHSC1L1      | 3.23 | 1.74 NM_017778.2    | Wolf-Hirschhorn syndrome candidate 1-like 1 (WHSC1L1)                  |
| METTL3       | 3.11 | 1.74 NM_019852.3    | methyltransferase like 3 (METTL3)                                      |
| ZBTB4        | 3.09 | 1.74 NM_020899.2    | zinc finger and BTB domain containing 4 (ZBTB4)                        |
| CENPH        | 3.05 | 1.74 NM_022909.3    | centromere protein H (CENPH)                                           |
| LCOR         | 2.92 | 1.74 NM_032440.2    | ligand dependent nuclear receptor corepressor (LCOR)                   |
| SESTD1       | 2.82 | 1.74 NM_178123.3    | SEC14 and spectrin domains 1 (SESTD1)                                  |
| PARVB        | 2.8  | 1.74 NM_013327.3    | parvin                                                                 |
| GOPC         | 2.78 | 1.74 NM_020399.2    | golgi associated PDZ and coiled-coil motif containing (GOPC)           |
| NUP205       | 2.5  | 1.74 NM_015135.1    | nucleoporin 205kDa (NUP205)                                            |
| RAB40B       | 2.44 | 1.74 NM_006822.1    | RAB40B                                                                 |
| TNRC6A       | 2.37 | 1.74 NM_014494.2    | trinucleotide repeat containing 6A (TNRC6A)                            |
| CHP          | 2.35 | 1.74 NM_007236.3    | calcium binding protein P22 (CHP)                                      |
| GNS          | 2.33 | 1.74 NM_002076.2    | glucosamine (N-acetyl)-6-sulfatase (Sanfilippo disease IIID) (GNS)     |
| TMBIM6       | 2.04 | 1.74 NM_003217.2    | transmembrane BAX inhibitor motif containing 6 (TMBIM6)                |
| SIVA1        | 1.72 | 1.74 NM_021709.2    | SIVA1                                                                  |
| LOC100130008 | 3.23 | 1.73 XM_001724677.1 | PREDICTED: similar to hCG2024106                                       |
| FBXL6        | 3.11 | 1.73 NM_024555.3    | F-box and leucine-rich repeat protein 6 (FBXL6)                        |
| FBXW2        | 3.06 | 1.73 NM_012164.2    | F-box and WD-40 domain protein 2 (FBXW2)                               |
| WDR19        | 2.97 | 1.73 NM_025132.3    | WD repeat domain 19 (WDR19)                                            |
| PBK          | 2.82 | 1.73 NM_018492.2    | PDZ binding kinase (PBK)                                               |
| IFNAR2       | 2.78 | 1.73 NM_207585.1    | interferon (alpha)                                                     |
| C1orf71      | 2.66 | 1.73 NM_152609.1    | chromosome 1 open reading frame 71 (C1orf71)                           |
| SLC16A5      | 2.58 | 1.73 NM_004695.2    | PREDICTED: solute carrier family 16 (monocarboxylic acid transporters) |
| EIF2S1       | 2.57 | 1.73 NM_004094.4    | eukaryotic translation initiation factor 2                             |
| C7orf40      | 2.49 | 1.73 NR_003697.1    | chromosome 7 open reading frame 40 (C7orf40)                           |
| KIAA1267     | 2.48 | 1.73 NM_015443.2    | KIAA1267 (KIAA1267)                                                    |
| TROVE2       | 2.37 | 1.73 NM_001042369.1 | TROVE domain family                                                    |
| PXMP2        | 2.28 | 1.73 NM_018663.1    | PREDICTED: peroxisomal membrane protein 2                              |
| LOC374395    | 2.19 | 1.73 NM_199337.1    | similar to RIKEN cDNA 1810059G22 (LOC374395)                           |
| RPA2         | 2    | 1.73 NM_002946.3    | replication protein A2                                                 |
| PNRC2        | 1.69 | 1.73 NM_017761.2    | proline-rich nuclear receptor coactivator 2 (PNRC2)                    |

|           |      |                     |                                                                    |
|-----------|------|---------------------|--------------------------------------------------------------------|
| AHCTF1    | 2.96 | 1.72 NM_015446.3    | PREDICTED: AT hook containing transcription factor 1 (AHCTF1)      |
| ELOVL1    | 2.92 | 1.72 NM_022821.2    | elongation of very long chain fatty acids (FEN1/Elo2)              |
| SFMBT1    | 2.87 | 1.72 NM_016329.2    | Scm-like with four mbt domains 1 (SFMBT1)                          |
| TBC1D14   | 2.62 | 1.72 NM_020773.1    | TBC1 domain family                                                 |
| UNC50     | 2.32 | 1.72 NM_014044.4    | unc-50 homolog (C. elegans) (UNC50)                                |
| BIRC5     | 2.23 | 1.72 NM_001168.2    | baculoviral IAP repeat-containing 5 (BIRC5)                        |
| TSC22D1   | 1.94 | 1.72 NM_183422.1    | TSC22 domain family                                                |
| IL8       | 1.8  | 1.72 NM_000584.2    | interleukin 8 (IL8)                                                |
| ABTB1     | 3.23 | 1.71 NM_172028.1    | ankyrin repeat and BTB (POZ) domain containing 1 (ABTB1)           |
| SMAP1     | 2.92 | 1.71 NM_021940.2    | small ArfGAP 1 (SMAP1)                                             |
| CUGBP1    | 2.78 | 1.71 NM_198700.1    | CUG triplet repeat                                                 |
| SMG1      | 2.71 | 1.71 NM_015092.3    | PI-3-kinase-related kinase SMG-1 (SMG1)                            |
| FAM116A   | 2.67 | 1.71 XM_001132771.1 | PREDICTED: family with sequence similarity 116                     |
| ZFP36     | 2.65 | 1.71 NM_003407.2    | zinc finger protein 36                                             |
| ZNF252    | 2.62 | 1.71 NR_023392.1    | zinc finger protein 252 (ZNF252)                                   |
| TXNDC12   | 2.34 | 1.71 NM_015913.2    | thioredoxin domain containing 12 (endoplasmic reticulum) (TXNDC12) |
| ATG3      | 2.24 | 1.71 NM_022488.3    | ATG3 autophagy related 3 homolog (S. cerevisiae) (ATG3)            |
| PLEKHA1   | 2.04 | 1.71 NM_001001974.1 | pleckstrin homology domain containing                              |
| MLL4      | 3.01 | 1.7 NM_014727.1     | myeloid/lymphoid or mixed-lineage leukemia 4 (MLL4)                |
| NR1D2     | 2.95 | 1.7 XM_001130839.1  | PREDICTED: nuclear receptor subfamily 1                            |
| PDLIM3    | 2.95 | 1.7 NM_014476.1     | PDZ and LIM domain 3 (PDLIM3)                                      |
| SYNJ1     | 2.94 | 1.7 NM_203446.1     | synaptojanin 1 (SYNJ1)                                             |
| FAM126B   | 2.82 | 1.7 NM_173822.2     | family with sequence similarity 126                                |
| BMPR2     | 2.81 | 1.7 NM_001204.5     | bone morphogenetic protein receptor                                |
| TRIOBP    | 2.78 | 1.7 NM_001039141.1  | TRIO and F-actin binding protein (TRIOBP)                          |
| C9orf37   | 2.66 | 1.7 NM_032937.3     | chromosome 9 open reading frame 37 (C9orf37)                       |
| LRP8      | 2.61 | 1.7 NM_017522.3     | low density lipoprotein receptor-related protein 8                 |
| PPP4C     | 2.41 | 1.7 NM_002720.1     | protein phosphatase 4 (formerly X)                                 |
| CRIPT     | 2.34 | 1.7 NM_014171.3     | cysteine-rich PDZ-binding protein (CRIPT)                          |
| LCMT1     | 2.12 | 1.7 NM_016309.2     | leucine carboxyl methyltransferase 1 (LCMT1)                       |
| OCIAD2    | 2.04 | 1.7 NM_001014446.1  | OCIA domain containing 2 (OCIAD2)                                  |
| ADAMTSL5  | 3.02 | 1.69 NM_213604.1    | ADAMTS-like 5 (ADAMTSL5)                                           |
| HCCS      | 2.86 | 1.69 NM_005333.2    | holocytochrome c synthase (cytochrome c heme-lyase) (HCCS)         |
| SFMBT1    | 2.81 | 1.69 NM_001005158.1 | Scm-like with four mbt domains 1 (SFMBT1)                          |
| LOC441481 | 2.74 | 1.69 XR_038228.1    | PREDICTED: misc_RNA (LOC441481)                                    |
| POFUT1    | 2.74 | 1.69 NM_015352.1    | protein O-fucosyltransferase 1 (POFUT1)                            |
| HNRNPC    | 2.63 | 1.69 NM_001077442.1 | heterogeneous nuclear ribonucleoprotein C (C1/C2) (HNRNPC)         |
| SDHA      | 2.6  | 1.69 NM_004168.1    | succinate dehydrogenase complex                                    |
| PPP4R1    | 2.32 | 1.69 NM_005134.2    | protein phosphatase 4                                              |
| FAM46A    | 2.04 | 1.69 NM_017633.2    | family with sequence similarity 46                                 |
| PPT2      | 2.92 | 1.68 NM_138717.1    | palmitoyl-protein thioesterase 2 (PPT2)                            |
| PPP1R8    | 2.9  | 1.68 NM_138558.1    | protein phosphatase 1                                              |
| C3orf21   | 2.76 | 1.68 NM_152531.3    | chromosome 3 open reading frame 21 (C3orf21)                       |
| FAM135A   | 2.75 | 1.68 NM_020819.2    | family with sequence similarity 135                                |
| PHF11     | 2.75 | 1.68 NM_001040443.1 | PHD finger protein 11 (PHF11)                                      |
| TUB       | 2.69 | 1.68 NM_177972.1    | tubby homolog (mouse) (TUB)                                        |
| EXT1      | 2.55 | 1.68 NM_000127.2    | exostoses (multiple) 1 (EXT1)                                      |
| NOL6      | 2.53 | 1.68 NM_139235.3    | nucleolar protein family 6 (RNA-associated) (NOL6)                 |
| LSM12     | 2.5  | 1.68 NM_152344.1    | LSM12 homolog (S. cerevisiae) (LSM12)                              |

|                  |      |                     |                                                                              |
|------------------|------|---------------------|------------------------------------------------------------------------------|
| <b>GORASP2</b>   | 2.46 | 1.68 NM_015530.3    | golgi reassembly stacking protein 2                                          |
| <b>PPIC</b>      | 2.35 | 1.68 NM_000943.4    | peptidylprolyl isomerase C (cyclophilin C) (PPIC)                            |
| <b>TMEM69</b>    | 2.17 | 1.68 NM_016486.3    | transmembrane protein 69 (TMEM69)                                            |
| <b>LOC651198</b> | 2.08 | 1.68 XM_001715717.1 | PREDICTED: similar to hCG2036706 (LOC651198)                                 |
| <b>KIAA1468</b>  | 2.96 | 1.67 NM_020854.3    | KIAA1468 (KIAA1468)                                                          |
| <b>GOLGA1</b>    | 2.85 | 1.67 NM_002077.2    | golgi autoantigen                                                            |
| <b>UBXN6</b>     | 2.74 | 1.67 NM_025241.1    | UBX domain protein 6 (UBXN6)                                                 |
| <b>CXorf39</b>   | 2.61 | 1.67 NM_207318.1    | chromosome X open reading frame 39 (CXorf39)                                 |
| <b>APPBP2</b>    | 2.58 | 1.67 NM_006380.2    | amyloid beta precursor protein (cytoplasmic tail) binding protein 2 (APPBP2) |
| <b>EEF1B2</b>    | 2.39 | 1.67 NM_021121.2    | eukaryotic translation elongation factor 1 beta 2 (EEF1B2)                   |
| <b>SNHG9</b>     | 2.28 | 1.67 NR_003142.2    | small nucleolar RNA host gene 9 (non-protein coding) (SNHG9)                 |
| <b>C2orf25</b>   | 1.74 | 1.67 NM_015702.1    | chromosome 2 open reading frame 25 (C2orf25)                                 |
| <b>ITPR1</b>     | 2.87 | 1.66 NM_002222.4    | inositol 1                                                                   |
| <b>EIF5A2</b>    | 2.85 | 1.66 NM_020390.5    | eukaryotic translation initiation factor 5A2 (EIF5A2)                        |
| <b>ST3GAL5</b>   | 2.66 | 1.66 NM_001042437.1 | ST3 beta-galactoside alpha-2                                                 |
| <b>VEGFC</b>     | 2.66 | 1.66 NM_005429.2    | vascular endothelial growth factor C (VEGFC)                                 |
| <b>HIAT1</b>     | 2.63 | 1.66 NM_033055.2    | hippocampus abundant transcript 1 (HIAT1)                                    |
| <b>CYB5R3</b>    | 2.57 | 1.66 NM_000398.4    | cytochrome b5 reductase 3 (CYB5R3)                                           |
| <b>FAM35A</b>    | 2.53 | 1.66 NM_019054.2    | PREDICTED: family with sequence similarity 35                                |
| <b>USP8</b>      | 2.5  | 1.66 NM_005154.2    | ubiquitin specific peptidase 8 (USP8)                                        |
| <b>BTF3L4</b>    | 2.46 | 1.66 NM_152265.1    | basic transcription factor 3-like 4 (BTF3L4)                                 |
| <b>FLJ20489</b>  | 2.46 | 1.66 NM_017842.1    | hypothetical protein FLJ20489 (FLJ20489)                                     |
| <b>TMED5</b>     | 2.45 | 1.66 NM_016040.3    | transmembrane emp24 protein transport domain containing 5 (TMED5)            |
| <b>C16orf91</b>  | 2.3  | 1.66 NM_001010878.1 | chromosome 16 open reading frame 91 (C16orf91)                               |
| <b>FRAG1</b>     | 2.28 | 1.66 NM_014489.1    | FGF receptor activating protein 1 (FRAG1)                                    |
| <b>NSF</b>       | 1.99 | 1.66 NM_006178.1    | PREDICTED: N-ethylmaleimide-sensitive factor (NSF)                           |
| <b>MAPRE1</b>    | 1.77 | 1.66 NM_012325.1    | microtubule-associated protein                                               |
| <b>HDDC2</b>     | 1.76 | 1.66 NM_016063.2    | HD domain containing 2 (HDDC2)                                               |
| <b>SBF2</b>      | 2.79 | 1.65 NM_030962.2    | SET binding factor 2 (SBF2)                                                  |
| <b>LYPD6</b>     | 2.66 | 1.65 NM_194317.2    | LY6/PLAUR domain containing 6 (LYPD6)                                        |
| <b>PHF11</b>     | 2.64 | 1.65 NM_001040443.1 | PHD finger protein 11 (PHF11)                                                |
| <b>C19orf48</b>  | 2.63 | 1.65 NM_199250.1    | chromosome 19 open reading frame 48 (C19orf48)                               |
| <b>C8orf38</b>   | 2.63 | 1.65 NM_152416.2    | chromosome 8 open reading frame 38 (C8orf38)                                 |
| <b>LYRM4</b>     | 2.57 | 1.65 NM_020408.3    | LYR motif containing 4 (LYRM4)                                               |
| <b>TBRG4</b>     | 2.57 | 1.65 NM_030900.2    | transforming growth factor beta regulator 4 (TBRG4)                          |
| <b>WDR42A</b>    | 2.55 | 1.65 NM_015726.2    | WD repeat domain 42A (WDR42A)                                                |
| <b>CDC14B</b>    | 2.54 | 1.65 NM_033332.1    | CDC14 cell division cycle 14 homolog B (S. cerevisiae) (CDC14B)              |
| <b>CSNK1G1</b>   | 2.51 | 1.65 NM_022048.3    | casein kinase 1                                                              |
| <b>DFFA</b>      | 2.35 | 1.65 NM_004401.2    | DNA fragmentation factor                                                     |
| <b>CPS1</b>      | 1.92 | 1.65 NM_001875.2    | carbamoyl-phosphate synthetase 1                                             |
| <b>YAP1</b>      | 1.89 | 1.65 NM_006106.2    | Yes-associated protein 1                                                     |
| <b>NDUFB4</b>    | 2.96 | 1.64 NM_004547.4    | NADH dehydrogenase (ubiquinone) 1 beta subcomplex                            |
| <b>ATG2A</b>     | 2.9  | 1.64 NM_015104.1    | ATG2 autophagy related 2 homolog A (S. cerevisiae) (ATG2A)                   |
| <b>ORMDL1</b>    | 2.86 | 1.64 NM_016467.3    | ORM1-like 1 (S. cerevisiae) (ORMDL1)                                         |
| <b>SRGAP2</b>    | 2.81 | 1.64 NM_015326.2    | SLIT-ROBO Rho GTPase activating protein 2 (SRGAP2)                           |
| <b>PRAF2</b>     | 2.69 | 1.64 NM_007213.1    | PRA1 domain family                                                           |
| <b>DICER1</b>    | 2.63 | 1.64 NM_030621.2    | Dicer1                                                                       |
| <b>CLEC16A</b>   | 2.59 | 1.64 NM_015226.1    | C-type lectin domain family 16                                               |
| <b>DARS2</b>     | 2.59 | 1.64 NM_018122.3    | aspartyl-tRNA synthetase 2                                                   |



|                     |      |                     |                                                                                       |
|---------------------|------|---------------------|---------------------------------------------------------------------------------------|
| <b>GTF2IRD1</b>     | 2.53 | 1.64 NM_016328.1    | GTF2I repeat domain containing 1 (GTF2IRD1)                                           |
| <b>LAMP2</b>        | 2.5  | 1.64 NM_013995.1    | lysosomal-associated membrane protein 2 (LAMP2)                                       |
| <b>GLOD4</b>        | 2.44 | 1.64 NM_016080.2    | glyoxalase domain containing 4 (GLOD4)                                                |
| <b>MIER1</b>        | 2.42 | 1.64 NM_020948.2    | mesoderm induction early response 1 homolog ( <i>Xenopus laevis</i> ) (MIER1)         |
| <b>RPS29</b>        | 2.4  | 1.64 NM_001030001.1 | ribosomal protein S29 (RPS29)                                                         |
| <b>C2orf28</b>      | 2.35 | 1.64 NM_080592.2    | chromosome 2 open reading frame 28 (C2orf28)                                          |
| <b>BMF</b>          | 2.33 | 1.64 NM_001003943.1 | Bcl2 modifying factor (BMF)                                                           |
| <b>TBRG4</b>        | 2.28 | 1.64 NM_199122.1    | transforming growth factor beta regulator 4 (TBRG4)                                   |
| <b>SIVA</b>         | 2.16 | 1.64 NM_006427.2    | CD27-binding (Siva) protein (SIVA)                                                    |
| <b>CCNA2</b>        | 1.96 | 1.64 NM_001237.2    | cyclin A2 (CCNA2)                                                                     |
| <b>KLF11</b>        | 2.69 | 1.63 XM_001129527.1 | PREDICTED: Kruppel-like factor 11 (KLF11)                                             |
| <b>DCPS</b>         | 2.66 | 1.63 NM_014026.3    | decapping enzyme                                                                      |
| <b>SUMF1</b>        | 2.63 | 1.63 NM_182760.2    | sulfatase modifying factor 1 (SUMF1)                                                  |
| <b>ANKRD54</b>      | 2.62 | 1.63 NM_138797.1    | ankyrin repeat domain 54 (ANKRD54)                                                    |
| <b>R3HDM1</b>       | 2.57 | 1.63 NM_015361.2    | R3H domain containing 1 (R3HDM1)                                                      |
| <b>ABLIM1</b>       | 2.55 | 1.63 NM_001003407.1 | actin binding LIM protein 1 (ABLIM1)                                                  |
| <b>ADAM15</b>       | 2.54 | 1.63 NM_003815.3    | ADAM metalloproteinase domain 15 (ADAM15)                                             |
| <b>PKD2</b>         | 2.54 | 1.63 NM_000297.2    | polycystic kidney disease 2 (autosomal dominant) (PKD2)                               |
| <b>BAMBI</b>        | 2.47 | 1.63 NM_012342.2    | BMP and activin membrane-bound inhibitor homolog ( <i>Xenopus laevis</i> ) (BAMBI)    |
| <b>FAM82A2</b>      | 2.31 | 1.63 NM_018145.1    | family with sequence similarity 82                                                    |
| <b>PPP2CB</b>       | 2.31 | 1.63 NM_004156.2    | protein phosphatase 2 (formerly 2A)                                                   |
| <b>KIAA1267</b>     | 2.28 | 1.63 NM_015443.2    | KIAA1267 (KIAA1267)                                                                   |
| <b>RWDD4A</b>       | 2.25 | 1.63 NM_152682.2    | RWD domain containing 4A (RWDD4A)                                                     |
| <b>STOM</b>         | 2.02 | 1.63 NM_004099.4    | stomatin (STOM)                                                                       |
| <b>SNF8</b>         | 1.8  | 1.63 NM_007241.2    | SNF8                                                                                  |
| <b>CCND3</b>        | 1.77 | 1.63 NM_001760.2    | cyclin D3 (CCND3)                                                                     |
| <b>MMADHC</b>       | 1.73 | 1.63 NM_015702.2    | methylmalonic aciduria (cobalamin deficiency) cblD type                               |
| <b>LOC100131261</b> | 1.66 | 1.63 XM_001723141.1 | PREDICTED: similar to hCG1728885 (LOC100131261)                                       |
| <b>ZNF827</b>       | 2.81 | 1.62 NM_178835.3    | zinc finger protein 827 (ZNF827)                                                      |
| <b>KIAA1539</b>     | 2.68 | 1.62 NM_025182.2    | KIAA1539 (KIAA1539)                                                                   |
| <b>PIK3CA</b>       | 2.57 | 1.62 NM_006218.2    | phosphoinositide-3-kinase                                                             |
| <b>C5orf41</b>      | 2.54 | 1.62 NM_153607.1    | chromosome 5 open reading frame 41 (C5orf41)                                          |
| <b>SLC35E1</b>      | 2.51 | 1.62 NM_024881.4    | solute carrier family 35                                                              |
| <b>ZBED4</b>        | 2.49 | 1.62 NM_014838.2    | zinc finger                                                                           |
| <b>TIGD5</b>        | 2.43 | 1.62 NM_032862.2    | tigger transposable element derived 5 (TIGD5)                                         |
| <b>DCP2</b>         | 2.32 | 1.62 NM_152624.4    | DCP2 decapping enzyme homolog ( <i>S. cerevisiae</i> ) (DCP2)                         |
| <b>PHKB</b>         | 2.28 | 1.62 NM_001031835.1 | phosphorylase kinase                                                                  |
| <b>OSBPL2</b>       | 2.25 | 1.62 NM_144498.1    | oxysterol binding protein-like 2 (OSBPL2)                                             |
| <b>CMTM3</b>        | 2.22 | 1.62 NM_144601.2    | CKLF-like MARVEL transmembrane domain containing 3 (CMTM3)                            |
| <b>LOC651697</b>    | 2.11 | 1.62 XR_039237.1    | PREDICTED: misc_RNA (LOC651697)                                                       |
| <b>ANKRD9</b>       | 2.03 | 1.62 NM_152326.2    | ankyrin repeat domain 9 (ANKRD9)                                                      |
| <b>RNF114</b>       | 2    | 1.62 NM_018683.3    | ring finger protein 114 (RNF114)                                                      |
| <b>RBBP7</b>        | 1.8  | 1.62 NM_002893.2    | retinoblastoma binding protein 7 (RBBP7)                                              |
| <b>TFPI</b>         | 2.83 | 1.61 NM_001032281.2 | tissue factor pathway inhibitor (lipoprotein-associated coagulation inhibitor) (TFPI) |
| <b>LIPT1</b>        | 2.7  | 1.61 NM_015929.2    | lipoyltransferase 1 (LIPT1)                                                           |
| <b>ANKRA2</b>       | 2.68 | 1.61 NM_023039.2    | ankyrin repeat                                                                        |
| <b>C3orf38</b>      | 2.66 | 1.61 NM_173824.2    | chromosome 3 open reading frame 38 (C3orf38)                                          |
| <b>MGC3032</b>      | 2.65 | 1.61 XM_933539.2    | PREDICTED: hypothetical protein MGC3032                                               |
| <b>LOC92249</b>     | 2.52 | 1.61 NR_015353.1    | hypothetical LOC92249 (LOC92249)                                                      |

|                     |      |      |                |                                                                |
|---------------------|------|------|----------------|----------------------------------------------------------------|
| <b>TMEM5</b>        | 2.51 | 1.61 | NM_014254.1    | transmembrane protein 5 (TMEM5)                                |
| <b>ATAD2</b>        | 2.5  | 1.61 | NM_014109.2    | ATPase family                                                  |
| <b>SLC5A6</b>       | 2.49 | 1.61 | NM_021095.1    | solute carrier family 5 (sodium-dependent vitamin transporter) |
| <b>UBE3C</b>        | 2.41 | 1.61 | NM_014671.1    | ubiquitin protein ligase E3C (UBE3C)                           |
| <b>RDH11</b>        | 2.36 | 1.61 | NM_016026.2    | retinol dehydrogenase 11 (all-trans/9-cis/11-cis) (RDH11)      |
| <b>ZFAND6</b>       | 2.33 | 1.61 | NM_019006.2    | zinc finger                                                    |
| <b>MTMR3</b>        | 2.32 | 1.61 | NM_021090.3    | myotubularin related protein 3 (MTMR3)                         |
| <b>DNAJC12</b>      | 2.26 | 1.61 | NM_021800.2    | DnaJ (Hsp40) homolog                                           |
| <b>CMTM7</b>        | 2.25 | 1.61 | NM_181472.1    | CKLF-like MARVEL transmembrane domain containing 7 (CMTM7)     |
| <b>ZMAT3</b>        | 2.22 | 1.61 | NM_152240.1    | zinc finger                                                    |
| <b>CNOT1</b>        | 2.16 | 1.61 | NM_016284.3    | CCR4-NOT transcription complex                                 |
| <b>LOC729843</b>    | 2.1  | 1.61 | XR_016056.1    | PREDICTED: similar to WW domain binding protein 1 (LOC729843)  |
| <b>MGEA5</b>        | 2.06 | 1.61 | NM_012215.2    | meningioma expressed antigen 5 (hyaluronidase) (MGEA5)         |
| <b>EFHD2</b>        | 2.04 | 1.61 | NM_024329.4    | EF-hand domain family                                          |
| <b>ZNF148</b>       | 1.98 | 1.61 | NM_021964.1    | zinc finger protein 148 (ZNF148)                               |
| <b>TIGD2</b>        | 2.7  | 1.6  | NM_145715.2    | tigger transposable element derived 2 (TIGD2)                  |
| <b>UBAP2L</b>       | 2.68 | 1.6  | NM_014847.2    | ubiquitin associated protein 2-like (UBAP2L)                   |
| <b>C14orf28</b>     | 2.62 | 1.6  | NM_001017923.1 | chromosome 14 open reading frame 28 (C14orf28)                 |
| <b>UBTD2</b>        | 2.59 | 1.6  | NM_152277.2    | ubiquitin domain containing 2 (UBTD2)                          |
| <b>ARL13B</b>       | 2.55 | 1.6  | NM_144996.2    | ADP-ribosylation factor-like 13B (ARL13B)                      |
| <b>HOXA10</b>       | 2.5  | 1.6  | NM_018951.3    | homeobox A10 (HOXA10)                                          |
| <b>TMEM150A</b>     | 2.49 | 1.6  | NM_001031738.1 | transmembrane protein 150A (TMEM150A)                          |
| <b>DCTD</b>         | 2.46 | 1.6  | NM_001921.2    | dCMP deaminase (DCTD)                                          |
| <b>OCRL</b>         | 2.43 | 1.6  | NM_000276.3    | oculocerebrorenal syndrome of Lowe (OCRL)                      |
| <b>MRPS28</b>       | 2.38 | 1.6  | NM_014018.2    | mitochondrial ribosomal protein S28 (MRPS28)                   |
| <b>SNCAIP</b>       | 2.37 | 1.6  | NM_005460.2    | synuclein                                                      |
| <b>TMEM179B</b>     | 2.33 | 1.6  | NM_199337.2    | transmembrane protein 179B (TMEM179B)                          |
| <b>PNPO</b>         | 2.25 | 1.6  | NM_018129.2    | pyridoxamine 5'-phosphate oxidase (PNPO)                       |
| <b>ARL2BP</b>       | 2.11 | 1.6  | NM_012106.3    | ADP-ribosylation factor-like 2 binding protein (ARL2BP)        |
| <b>NUP155</b>       | 2.08 | 1.6  | NM_153485.1    | nucleoporin 155kDa (NUP155)                                    |
| <b>FAM57A</b>       | 2.05 | 1.6  | NM_024792.1    | family with sequence similarity 57                             |
| <b>CENPB</b>        | 2.03 | 1.6  | NM_001810.5    | centromere protein B                                           |
| <b>LOC100132535</b> | 2.62 | 1.59 | XR_038464.1    | PREDICTED: misc_RNA (LOC100132535)                             |
| <b>NRBP1</b>        | 2.52 | 1.59 | NM_013392.2    | nuclear receptor binding protein 1 (NRBP1)                     |
| <b>ZNF280C</b>      | 2.48 | 1.59 | NM_017666.2    | zinc finger protein 280C (ZNF280C)                             |
| <b>STRADB</b>       | 2.46 | 1.59 | NM_018571.5    | STE20-related kinase adaptor beta (STRADB)                     |
| <b>NFYC</b>         | 2.43 | 1.59 | NM_014223.2    | nuclear transcription factor Y                                 |
| <b>TSC1</b>         | 2.32 | 1.59 | NM_000368.3    | tuberous sclerosis 1 (TSC1)                                    |
| <b>OTUD1</b>        | 2.21 | 1.59 | XM_001134465.1 | PREDICTED: OTU domain containing 1 (OTUD1)                     |
| <b>PQLC1</b>        | 1.94 | 1.59 | NM_025078.3    | PQ loop repeat containing 1 (PQLC1)                            |
| <b>MED28</b>        | 1.91 | 1.59 | NM_025205.3    | mediator complex subunit 28 (MED28)                            |
| <b>NUP88</b>        | 1.84 | 1.59 | NM_002532.3    | nucleoporin 88kDa (NUP88)                                      |
| <b>HINT2</b>        | 1.78 | 1.59 | NM_032593.2    | histidine triad nucleotide binding protein 2 (HINT2)           |
| <b>VAMP8</b>        | 1.78 | 1.59 | NM_003761.2    | vesicle-associated membrane protein 8 (endobrevin) (VAMP8)     |
| <b>PRDX3</b>        | 1.61 | 1.59 | NM_006793.2    | peroxiredoxin 3 (PRDX3)                                        |
| <b>PITX1</b>        | 1.39 | 1.59 | NM_002653.3    | paired-like homeodomain transcription factor 1 (PITX1)         |
| <b>LIPT1</b>        | 2.63 | 1.58 | NM_015929.2    | lipoyltransferase 1 (LIPT1)                                    |
| <b>TP53INP1</b>     | 2.63 | 1.58 | NM_033285.2    | tumor protein p53 inducible nuclear protein 1 (TP53INP1)       |
| <b>H2AFV</b>        | 2.61 | 1.58 | NM_138635.3    | H2A histone family                                             |

|              |      |                     |                                                                 |
|--------------|------|---------------------|-----------------------------------------------------------------|
| LOC729941    | 2.56 | 1.58 XR_015717.2    | PREDICTED: misc_RNA (LOC729941)                                 |
| LOC728650    | 2.47 | 1.58 XR_042473.1    | PREDICTED: misc_RNA (LOC728650)                                 |
| AFF1         | 2.44 | 1.58 NM_005935.1    | AF4/FMR2 family                                                 |
| CMTM8        | 2.4  | 1.58 NM_178868.3    | CKLF-like MARVEL transmembrane domain containing 8 (CMTM8)      |
| TCEB3        | 2.29 | 1.58 NM_003198.1    | transcription elongation factor B (SIII)                        |
| ZCCHC24      | 2.21 | 1.58 NM_153367.2    | zinc finger                                                     |
| ACTL6A       | 2.14 | 1.58 NM_004301.3    | actin-like 6A (ACTL6A)                                          |
| AGL          | 2.1  | 1.58 NM_000645.2    | amylo-1                                                         |
| WWP1         | 2.03 | 1.58 NM_007013.3    | WW domain containing E3 ubiquitin protein ligase 1 (WWP1)       |
| KLF13        | 2.02 | 1.58 NM_015995.2    | Kruppel-like factor 13 (KLF13)                                  |
| C3orf10      | 1.85 | 1.58 NM_018462.4    | chromosome 3 open reading frame 10 (C3orf10)                    |
| GOLGA7       | 1.67 | 1.58 NM_001002296.1 | golgi autoantigen                                               |
| LOC401397    | 1.51 | 1.58 XM_001132317.1 | PREDICTED: hypothetical LOC401397 (LOC401397)                   |
| SAR1B        | 2.64 | 1.57 NM_001033503.1 | SAR1 homolog B ( <i>S. cerevisiae</i> ) (SAR1B)                 |
| RARA         | 2.5  | 1.57 NM_000964.2    | retinoic acid receptor                                          |
| DCUN1D4      | 2.47 | 1.57 NM_015115.2    | DCN1                                                            |
| IDI1         | 2.41 | 1.57 NM_004508.2    | isopentenyl-diphosphate delta isomerase 1 (IDI1)                |
| CUGBP1       | 2.36 | 1.57 NM_001025596.1 | CUG triplet repeat                                              |
| FAM165B      | 2.2  | 1.57 NM_058182.4    | family with sequence similarity 165                             |
| FBXO28       | 2.18 | 1.57 NM_015176.1    | F-box protein 28 (FBXO28)                                       |
| MAK16        | 2.09 | 1.57 NM_032509.2    | MAK16 homolog ( <i>S. cerevisiae</i> ) (MAK16)                  |
| CNOT7        | 1.99 | 1.57 NM_013354.5    | CCR4-NOT transcription complex                                  |
| RXRA         | 1.91 | 1.57 NM_002957.3    | retinoid X receptor                                             |
| UBE3A        | 1.91 | 1.57 NM_000462.2    | ubiquitin protein ligase E3A (UBE3A)                            |
| SIVA1        | 1.82 | 1.57 NM_006427.3    | SIVA1                                                           |
| TROVE2       | 1.81 | 1.57 NM_001042369.1 | TROVE domain family                                             |
| KLF9         | 1.75 | 1.57 NM_001206.2    | Kruppel-like factor 9 (KLF9)                                    |
| SSB          | 1.7  | 1.57 NM_003142.3    | Sjogren syndrome antigen B (autoantigen La) (SSB)               |
| AHR          | 1.52 | 1.57 NM_001621.2    | aryl hydrocarbon receptor (AHR)                                 |
| LIN7B        | 2.7  | 1.56 NM_022165.2    | lin-7 homolog B ( <i>C. elegans</i> ) (LIN7B)                   |
| RBM12B       | 2.53 | 1.56 NM_203390.2    | RNA binding motif protein 12B (RBM12B)                          |
| C15orf44     | 2.48 | 1.56 NM_030800.1    | PREDICTED: chromosome 15 open reading frame 44 (C15orf44)       |
| FZD6         | 2.43 | 1.56 NM_003506.2    | frizzled homolog 6 ( <i>Drosophila</i> ) (FZD6)                 |
| AZIN1        | 2.42 | 1.56 NM_148174.2    | antizyme inhibitor 1 (AZIN1)                                    |
| C17orf85     | 2.42 | 1.56 NM_018553.1    | chromosome 17 open reading frame 85 (C17orf85)                  |
| PDIK1L       | 2.37 | 1.56 NM_152835.2    | PDLIM1 interacting kinase 1 like (PDIK1L)                       |
| LOC100130092 | 2.36 | 1.56 XR_039545.1    | PREDICTED: misc_RNA (LOC100130092)                              |
| ZNF362       | 2.35 | 1.56 NM_152493.2    | zinc finger protein 362 (ZNF362)                                |
| HEG1         | 2.29 | 1.56 NM_020733.1    | HEG homolog 1 (zebrafish) (HEG1)                                |
| TM7SF3       | 2.27 | 1.56 NM_016551.1    | transmembrane 7 superfamily member 3 (TM7SF3)                   |
| LYRM2        | 2.13 | 1.56 NM_020466.4    | LYR motif containing 2 (LYRM2)                                  |
| LOC440353    | 2.06 | 1.56 NR_002603.1    | nuclear pore complex interacting protein pseudogene (LOC440353) |
| ALDH3A2      | 1.97 | 1.56 NM_001031806.1 | aldehyde dehydrogenase 3 family                                 |
| ZDHHC8       | 1.93 | 1.56 NM_013373.2    | zinc finger                                                     |
| PAPPA        | 1.87 | 1.56 NM_002581.3    | pregnancy-associated plasma protein A                           |
| RFX7         | 1.79 | 1.56 NM_022841.5    | regulatory factor X                                             |
| MMP23B       | 2.71 | 1.55 NM_006983.1    | matrix metalloproteinase 23B (MMP23B)                           |
| RBMS1        | 2.63 | 1.55 NM_002897.3    | RNA binding motif                                               |
| CPA4         | 2.6  | 1.55 NM_016352.2    | carboxypeptidase A4 (CPA4)                                      |

|              |      |      |                |                                                                                          |
|--------------|------|------|----------------|------------------------------------------------------------------------------------------|
| TADA2B       | 2.42 | 1.55 | NM_152293.2    | transcriptional adaptor 2B (TADA2B)                                                      |
| ZNF473       | 2.37 | 1.55 | NM_015428.1    | zinc finger protein 473 (ZNF473)                                                         |
| KIAA1429     | 2.33 | 1.55 | NM_015496.3    | KIAA1429 (KIAA1429)                                                                      |
| HOXA5        | 2.31 | 1.55 | NM_019102.2    | homeobox A5 (HOXA5)                                                                      |
| TOPORS       | 2.22 | 1.55 | NM_005802.2    | topoisomerase I binding                                                                  |
| LCLAT1       | 2.11 | 1.55 | NM_001002257.1 | lysocardiolipin acyltransferase 1 (LCLAT1)                                               |
| ICAM3        | 2.09 | 1.55 | NM_002162.2    | intercellular adhesion molecule 3 (ICAM3)                                                |
| LOC100134304 | 2.07 | 1.55 | XM_001720739.1 | PREDICTED: similar to hCG1983233 (LOC100134304)                                          |
| C14orf142    | 2.03 | 1.55 | NM_032490.4    | chromosome 14 open reading frame 142 (C14orf142)                                         |
| DCBLD2       | 2.01 | 1.55 | NM_080927.3    | discoidin                                                                                |
| AGFG1        | 1.73 | 1.55 | NM_001135189.1 | ArfGAP with FG repeats 1 (AGFG1)                                                         |
| C20orf43     | 1.52 | 1.55 | NM_016407.2    | chromosome 20 open reading frame 43 (C20orf43)                                           |
| SNN          | 2.5  | 1.54 | NM_003498.4    | stannin (SNN)                                                                            |
| SCML1        | 2.29 | 1.54 | NM_001037540.1 | sex comb on midleg-like 1 (Drosophila) (SCML1)                                           |
| STAT3        | 2.26 | 1.54 | NM_213662.1    | signal transducer and activator of transcription 3 (acute-phase response factor) (STAT3) |
| ATXN1L       | 2.23 | 1.54 | NM_001137675.2 | ataxin 1-like (ATXN1L)                                                                   |
| BCAP29       | 2.23 | 1.54 | NM_001008406.1 | B-cell receptor-associated protein 29 (BCAP29)                                           |
| FAM173B      | 2.21 | 1.54 | NM_199133.2    | family with sequence similarity 173                                                      |
| CLDN1        | 2.18 | 1.54 | NM_021101.3    | claudin 1 (CLDN1)                                                                        |
| VPS37A       | 2.13 | 1.54 | NM_152415.1    | vacuolar protein sorting 37 homolog A (S. cerevisiae) (VPS37A)                           |
| E2F4         | 2.1  | 1.54 | NM_001950.3    | E2F transcription factor 4                                                               |
| DEXI         | 2    | 1.54 | NM_014015.3    | Dexi homolog (mouse) (DEXI)                                                              |
| LEPROT       | 1.97 | 1.54 | NM_017526.2    | leptin receptor overlapping transcript (LEPROT)                                          |
| FNBP1L       | 1.96 | 1.54 | NM_001024948.1 | formin binding protein 1-like (FNBP1L)                                                   |
| LOC728888    | 1.96 | 1.54 | XR_015889.1    | PREDICTED: similar to Protein KIAA0220 (LOC728888)                                       |
| OSBPL10      | 1.84 | 1.54 | NM_017784.3    | oxysterol binding protein-like 10 (OSBPL10)                                              |
| SDHD         | 1.84 | 1.54 | NM_003002.1    | succinate dehydrogenase complex                                                          |
| C9orf30      | 1.77 | 1.54 | NM_080655.1    | chromosome 9 open reading frame 30 (C9orf30)                                             |
| NMRAL1       | 1.75 | 1.54 | NM_020677.2    | NmrA-like family domain containing 1 (NMRAL1)                                            |
| ZFP36L1      | 1.7  | 1.54 | NM_004926.2    | zinc finger protein 36                                                                   |
| PSMC2        | 1.64 | 1.54 | NM_002803.2    | proteasome (prosome)                                                                     |
| FXR1         | 1.55 | 1.54 | NM_005087.2    | fragile X mental retardation                                                             |
| FOXK2        | 2.53 | 1.53 | NM_004514.3    | forkhead box K2 (FOXK2)                                                                  |
| SLC9A1       | 2.52 | 1.53 | NM_003047.2    | solute carrier family 9 (sodium/hydrogen exchanger)                                      |
| FAM190B      | 2.48 | 1.53 | NM_018999.2    | family with sequence similarity 190                                                      |
| ZNF260       | 2.46 | 1.53 | NM_001012756.1 | zinc finger protein 260 (ZNF260)                                                         |
| KCNK2        | 2.42 | 1.53 | NM_001017425.2 | potassium channel                                                                        |
| EIF2C1       | 2.32 | 1.53 | NM_012199.2    | eukaryotic translation initiation factor 2C                                              |
| RNH1         | 2.32 | 1.53 | NM_203385.1    | ribonuclease/angiogenin inhibitor 1 (RNH1)                                               |
| TP53INP1     | 2.31 | 1.53 | NM_033285.2    | tumor protein p53 inducible nuclear protein 1 (TP53INP1)                                 |
| FAM60A       | 2.27 | 1.53 | NM_021238.2    | family with sequence similarity 60                                                       |
| PLD6         | 2.27 | 1.53 | NM_178836.2    | phospholipase D family                                                                   |
| LCMT1        | 2.21 | 1.53 | NM_016309.2    | leucine carboxyl methyltransferase 1 (LCMT1)                                             |
| NUDT22       | 2.2  | 1.53 | NM_032344.1    | nudix (nucleoside diphosphate linked moiety X)-type motif 22 (NUDT22)                    |
| TRAPPC2      | 2.19 | 1.53 | NM_014563.3    | trafficking protein particle complex 2 (TRAPPC2)                                         |
| SPSB3        | 2.03 | 1.53 | NM_080861.3    | splA/ryanodine receptor domain and SOCS box containing 3 (SPSB3)                         |
| MYPOP        | 1.99 | 1.53 | NM_001012643.2 | Myb-related transcription factor                                                         |
| SLC4A7       | 1.99 | 1.53 | NM_003615.2    | solute carrier family 4                                                                  |
| LOC389137    | 1.94 | 1.53 | XM_371655.3    | PREDICTED: hypothetical LOC389137                                                        |

|              |      |                     |                                                                                  |
|--------------|------|---------------------|----------------------------------------------------------------------------------|
| NINJ1        | 1.87 | 1.53 NM_004148.3    | ninjurin 1 (NINJ1)                                                               |
| PPIC         | 1.83 | 1.53 NM_000943.4    | peptidylprolyl isomerase C (cyclophilin C) (PPIC)                                |
| LOC100130511 | 1.77 | 1.53 XR_038018.1    | PREDICTED: misc_RNA (LOC100130511)                                               |
| TM2D1        | 1.57 | 1.53 NM_032027.2    | TM2 domain containing 1 (TM2D1)                                                  |
| UBE2I        | 1.15 | 1.53 NM_194260.1    | ubiquitin-conjugating enzyme E2I (UBC9 homolog)                                  |
| TFG          | 2.57 | 1.52 NM_006070.4    | TRK-fused gene (TFG)                                                             |
| FAM18B2      | 2.5  | 1.52 NM_145301.1    | family with sequence similarity 18                                               |
| FAM81A       | 2.46 | 1.52 NM_152450.2    | family with sequence similarity 81                                               |
| CNNM3        | 2.44 | 1.52 NM_017623.4    | cyclin M3 (CNNM3)                                                                |
| LRIG1        | 2.39 | 1.52 NM_015541.2    | leucine-rich repeats and immunoglobulin-like domains 1 (LRIG1)                   |
| ZNF543       | 2.37 | 1.52 NM_213598.1    | zinc finger protein 543 (ZNF543)                                                 |
| GPAA1        | 2.28 | 1.52 NM_003801.3    | glycosylphosphatidylinositol anchor attachment protein 1 homolog (yeast) (GPAA1) |
| RBMS1        | 2.2  | 1.52 NM_002897.3    | RNA binding motif                                                                |
| TMEM109      | 2.18 | 1.52 NM_024092.1    | transmembrane protein 109 (TMEM109)                                              |
| RAB40C       | 1.95 | 1.52 NM_021168.2    | RAB40C                                                                           |
| LOC402538    | 2.54 | 1.51 XM_380121.3    | PREDICTED: hypothetical LOC402538 (LOC402538)                                    |
| ACPL2        | 2.41 | 1.51 NM_152282.3    | acid phosphatase-like 2 (ACPL2)                                                  |
| RNF24        | 2.33 | 1.51 NM_007219.2    | ring finger protein 24 (RNF24)                                                   |
| BMPR2        | 2.29 | 1.51 NM_001204.5    | bone morphogenetic protein receptor                                              |
| SOCS4        | 2.21 | 1.51 NM_080867.2    | suppressor of cytokine signaling 4 (SOCS4)                                       |
| HIBCH        | 2.1  | 1.51 NM_198047.1    | 3-hydroxyisobutyryl-Coenzyme A hydrolase (HIBCH)                                 |
| PTPN4        | 2.07 | 1.51 NM_002830.2    | protein tyrosine phosphatase                                                     |
| DDHD2        | 2.06 | 1.51 NM_015214.1    | DDHD domain containing 2 (DDHD2)                                                 |
| LOC644762    | 2.04 | 1.51 XR_019423.1    | PREDICTED: hypothetical LOC644762 (LOC644762)                                    |
| RHOT1        | 1.88 | 1.51 NM_001033566.1 | ras homolog gene family                                                          |
| CTDSP1       | 1.8  | 1.51 NM_005808.2    | CTD (carboxy-terminal domain)                                                    |
| SIGMAR1      | 1.79 | 1.51 NM_005866.2    | sigma non-opioid intracellular receptor 1 (SIGMAR1)                              |
| UBE3A        | 1.77 | 1.51 NM_000462.2    | ubiquitin protein ligase E3A (UBE3A)                                             |
| FAM108C1     | 1.76 | 1.51 NM_021214.1    | family with sequence similarity 108                                              |
| LOC730417    | 2.4  | 1.5 XM_001125098.1  | PREDICTED: hypothetical protein LOC730417 (LOC730417)                            |
| C10orf76     | 2.35 | 1.5 NM_024541.2     | chromosome 10 open reading frame 76 (C10orf76)                                   |
| C14orf45     | 2.31 | 1.5 NM_025057.1     | chromosome 14 open reading frame 45 (C14orf45)                                   |
| RELL1        | 2.25 | 1.5 NM_001085400.1  | RELT-like 1 (RELL1)                                                              |
| MRPS25       | 2.07 | 1.5 NM_022497.3     | mitochondrial ribosomal protein S25 (MRPS25)                                     |
| ZNF410       | 2.05 | 1.5 NM_021188.1     | zinc finger protein 410 (ZNF410)                                                 |
| CD46         | 2.04 | 1.5 NM_172358.1     | CD46 molecule                                                                    |
| FBXO22       | 2.03 | 1.5 NM_012170.2     | F-box protein 22 (FBXO22)                                                        |
| DYRK2        | 1.87 | 1.5 NM_003583.2     | dual-specificity tyrosine-(Y)-phosphorylation regulated kinase 2 (DYRK2)         |
| RAP2C        | 1.85 | 1.5 NM_021183.3     | RAP2C                                                                            |
| LGTN         | 1.74 | 1.5 NM_006893.2     | ligatin (LGTN)                                                                   |
| LOC493869    | 1.74 | 1.5 NM_001008397.1  | similar to RIKEN cDNA 2310016C16 (LOC493869)                                     |
| PPP2CA       | 1.69 | 1.5 NM_002715.2     | protein phosphatase 2 (formerly 2A)                                              |
| LAMC1        | 1.48 | 1.5 NM_002293.2     | laminin                                                                          |
| FOXP1        | 2.44 | 1.49 NM_032682.4    | forkhead box P1 (FOXP1)                                                          |
| RAVER2       | 2.26 | 1.49 NM_018211.2    | ribonucleoprotein                                                                |
| NPAL3        | 2.22 | 1.49 NM_020448.3    | NIPA-like domain containing 3 (NPAL3)                                            |
| REPS2        | 2.15 | 1.49 NM_004726.2    | RALBP1 associated Eps domain containing 2 (REPS2)                                |
| PRRG1        | 2.12 | 1.49 NM_000950.1    | proline rich Gla (G-carboxyglutamic acid) 1 (PRRG1)                              |
| SNAI2        | 2.07 | 1.49 NM_003068.3    | snail homolog 2 (Drosophila) (SNAI2)                                             |

|                  |      |      |                |                                                                                        |
|------------------|------|------|----------------|----------------------------------------------------------------------------------------|
| <b>TFAP2A</b>    | 2.05 | 1.49 | NM_001042425.1 | transcription factor AP-2 alpha (activating enhancer binding protein 2 alpha) (TFAP2A) |
| <b>NOP2</b>      | 2.04 | 1.49 | NM_001033714.1 | NOP2 nucleolar protein homolog (yeast) (NOP2)                                          |
| <b>MTCP1</b>     | 2    | 1.49 | NM_014221.3    | mature T-cell proliferation 1 (MTCP1)                                                  |
| <b>RAB24</b>     | 1.98 | 1.49 | NM_001031677.2 | RAB24                                                                                  |
| <b>LOC728556</b> | 1.9  | 1.49 | XM_001129672.1 | PREDICTED: similar to Protein C2orf4 (C21orf19-like protein) (LOC728556)               |
| <b>PTAR1</b>     | 1.9  | 1.49 | NM_001099666.1 | protein prenyltransferase alpha subunit repeat containing 1 (PTAR1)                    |
| <b>IFI44</b>     | 1.85 | 1.49 | NM_006417.3    | interferon-induced protein 44 (IFI44)                                                  |
| <b>PPP4R1</b>    | 1.82 | 1.49 | NM_005134.2    | protein phosphatase 4                                                                  |
| <b>RBPMS2</b>    | 1.71 | 1.49 | NM_194272.1    | RNA binding protein with multiple splicing 2 (RBPMS2)                                  |
| <b>CDC16</b>     | 1.61 | 1.49 | NM_001078645.1 | cell division cycle 16 homolog (S. cerevisiae) (CDC16)                                 |
| <b>RASIP1</b>    | 1.53 | 1.49 | NM_017805.2    | Ras interacting protein 1 (RASIP1)                                                     |
| <b>NDFIP2</b>    | 1.51 | 1.49 | NM_019080.1    | Nedd4 family interacting protein 2 (NDFIP2)                                            |
| <b>RBPMS</b>     | 2.43 | 1.48 | NM_001008710.1 | RNA binding protein with multiple splicing (RBPMS)                                     |
| <b>ZFYVE1</b>    | 2.42 | 1.48 | NM_021260.1    | zinc finger                                                                            |
| <b>FBXL6</b>     | 2.36 | 1.48 | NM_012162.1    | F-box and leucine-rich repeat protein 6 (FBXL6)                                        |
| <b>RFC1</b>      | 2.32 | 1.48 | NM_002913.3    | replication factor C (activator 1) 1                                                   |
| <b>SEC23IP</b>   | 2.31 | 1.48 | NM_007190.2    | SEC23 interacting protein (SEC23IP)                                                    |
| <b>MARK2</b>     | 2.3  | 1.48 | NM_004954.3    | MAP/microtubule affinity-regulating kinase 2 (MARK2)                                   |
| <b>SOCS5</b>     | 2.3  | 1.48 | NM_014011.4    | suppressor of cytokine signaling 5 (SOCS5)                                             |
| <b>TOB2</b>      | 2.3  | 1.48 | NM_016272.3    | transducer of ERBB2                                                                    |
| <b>ATP2B4</b>    | 2.22 | 1.48 | NM_001684.3    | ATPase                                                                                 |
| <b>KIAA1522</b>  | 2.2  | 1.48 | NM_020888.2    | KIAA1522 (KIAA1522)                                                                    |
| <b>STX12</b>     | 2.16 | 1.48 | NM_177424.2    | syntaxin 12 (STX12)                                                                    |
| <b>PDE8A</b>     | 2.14 | 1.48 | NM_173454.1    | phosphodiesterase 8A (PDE8A)                                                           |
| <b>ANKRD37</b>   | 2.09 | 1.48 | NM_181726.2    | ankyrin repeat domain 37 (ANKRD37)                                                     |
| <b>MAL2</b>      | 2.07 | 1.48 | NM_052886.2    | mal                                                                                    |
| <b>MTF1</b>      | 2.07 | 1.48 | NM_005955.2    | metal-regulatory transcription factor 1 (MTF1)                                         |
| <b>KLHL2</b>     | 2.06 | 1.48 | NM_007246.2    | kelch-like 2                                                                           |
| <b>MLLT10</b>    | 2.03 | 1.48 | NM_004641.2    | myeloid/lymphoid or mixed-lineage leukemia (trithorax homolog)                         |
| <b>SIK1</b>      | 2.01 | 1.48 | NM_173354.3    | salt-inducible kinase 1 (SIK1)                                                         |
| <b>GCLC</b>      | 2    | 1.48 | NM_001498.2    | glutamate-cysteine ligase                                                              |
| <b>PABPC4L</b>   | 1.98 | 1.48 | NM_001114734.1 | poly(A) binding protein                                                                |
| <b>MAP3K1</b>    | 1.97 | 1.48 | NM_005921.1    | mitogen-activated protein kinase kinase kinase 1 (MAP3K1)                              |
| <b>MR11</b>      | 1.92 | 1.48 | NM_001031727.2 | methylthioribose-1-phosphate isomerase homolog (S. cerevisiae) (MR11)                  |
| <b>RABGGTB</b>   | 1.88 | 1.48 | NM_004582.2    | Rab geranylgeranyltransferase                                                          |
| <b>SDAD1</b>     | 1.75 | 1.48 | NM_018115.2    | SDA1 domain containing 1 (SDAD1)                                                       |
| <b>URB1</b>      | 2.38 | 1.47 | NM_014825.2    | URB1 ribosome biogenesis 1 homolog (S. cerevisiae) (URB1)                              |
| <b>FAM54A</b>    | 2.36 | 1.47 | NM_138419.2    | family with sequence similarity 54                                                     |
| <b>MARK1</b>     | 2.33 | 1.47 | NM_018650.3    | MAP/microtubule affinity-regulating kinase 1 (MARK1)                                   |
| <b>SRGAP2</b>    | 2.31 | 1.47 | NM_015326.2    | SLIT-ROBO Rho GTPase activating protein 2 (SRGAP2)                                     |
| <b>MICALL1</b>   | 2.3  | 1.47 | NM_033386.2    | MICAL-like 1 (MICALL1)                                                                 |
| <b>NR2C2AP</b>   | 2.2  | 1.47 | NM_176880.4    | nuclear receptor 2C2-associated protein (NR2C2AP)                                      |
| <b>HECA</b>      | 2.17 | 1.47 | NM_016217.2    | headcase homolog (Drosophila) (HECA)                                                   |
| <b>C9orf125</b>  | 2.16 | 1.47 | NM_032342.1    | chromosome 9 open reading frame 125 (C9orf125)                                         |
| <b>R3HDM1</b>    | 2.12 | 1.47 | NM_015361.2    | R3H domain containing 1 (R3HDM1)                                                       |
| <b>KIAA1644</b>  | 1.77 | 1.47 | XM_936510.2    | PREDICTED: KIAA1644 protein (KIAA1644)                                                 |
| <b>CDKN2B</b>    | 1.76 | 1.47 | NM_004936.3    | cyclin-dependent kinase inhibitor 2B (p15)                                             |
| <b>FAM127C</b>   | 2.38 | 1.46 | NM_001078173.1 | family with sequence similarity 127                                                    |
| <b>DBNDD1</b>    | 2.26 | 1.46 | NM_001042610.1 | dysbindin (dystrobrevin binding protein 1) domain containing 1 (DBNDD1)                |

|           |      |                     |                                                                                |
|-----------|------|---------------------|--------------------------------------------------------------------------------|
| GABRE     | 2.21 | 1.46 NM_004961.3    | gamma-aminobutyric acid (GABA) A receptor                                      |
| TES       | 2.21 | 1.46 NM_015641.2    | testis derived transcript (3 LIM domains) (TES)                                |
| CMTM7     | 2.2  | 1.46 NM_181472.1    | CKLF-like MARVEL transmembrane domain containing 7 (CMTM7)                     |
| CA12      | 2.19 | 1.46 NM_001218.3    | carbonic anhydrase XII (CA12)                                                  |
| UBE2E3    | 2.15 | 1.46 NM_006357.2    | ubiquitin-conjugating enzyme E2E 3 (UBC4/5 homolog)                            |
| SYT17     | 2.12 | 1.46 NM_016524.2    | synaptotagmin XVII (SYT17)                                                     |
| MR11      | 2.11 | 1.46 NM_032285.2    | methylthioribose-1-phosphate isomerase homolog ( <i>S. cerevisiae</i> ) (MR11) |
| ZBTB2     | 2.09 | 1.46 NM_020861.1    | zinc finger and BTB domain containing 2 (ZBTB2)                                |
| MLLT10    | 2.08 | 1.46 NM_004641.2    | myeloid/lymphoid or mixed-lineage leukemia (trithorax homolog)                 |
| PAPD1     | 2.01 | 1.46 NM_018109.2    | PAP associated domain containing 1 (PAPD1)                                     |
| MED4      | 1.96 | 1.46 NM_014166.2    | mediator complex subunit 4 (MED4)                                              |
| STXBP5    | 1.96 | 1.46 NM_139244.2    | syntaxin binding protein 5 (tomosyn) (STXBP5)                                  |
| MGAT1     | 1.92 | 1.46 NM_002406.2    | mannosyl (alpha-1                                                              |
| PROSC     | 1.89 | 1.46 NM_007198.2    | proline synthetase co-transcribed homolog (bacterial) (PROSC)                  |
| C2orf47   | 1.76 | 1.46 NM_024520.1    | chromosome 2 open reading frame 47 (C2orf47)                                   |
| LOC641844 | 1.75 | 1.46 XR_018036.2    | PREDICTED: misc_RNA (LOC641844)                                                |
| RB1CC1    | 1.74 | 1.46 NM_001083617.1 | RB1-inducible coiled-coil 1 (RB1CC1)                                           |
| TNFAIP1   | 1.69 | 1.46 NM_021137.3    | tumor necrosis factor                                                          |
| PTGR1     | 1.16 | 1.46 NM_012212.2    | prostaglandin reductase 1 (PTGR1)                                              |
| FOXL2     | 2.35 | 1.45 NM_023067.2    | forkhead box L2 (FOXL2)                                                        |
| LOC729404 | 2.35 | 1.45 XR_015968.1    | PREDICTED: misc_RNA (LOC729404)                                                |
| KIAA1545  | 2.29 | 1.45 XM_495939.3    | PREDICTED: KIAA1545 protein (KIAA1545)                                         |
| PRKAG2    | 2.22 | 1.45 NM_001040633.1 | protein kinase                                                                 |
| MAP3K8    | 2.19 | 1.45 NM_005204.2    | mitogen-activated protein kinase kinase kinase 8 (MAP3K8)                      |
| RAPGEF6   | 2.18 | 1.45 NM_016340.4    | Rap guanine nucleotide exchange factor (GEF) 6 (RAPGEF6)                       |
| AKTIP     | 2.17 | 1.45 NM_022476.2    | AKT interacting protein (AKTIP)                                                |
| NAGPA     | 2.15 | 1.45 NM_016256.2    | N-acetylglucosamine-1-phosphodiester alpha-N-acetylglucosaminidase (NAGPA)     |
| RNH1      | 2.09 | 1.45 NM_203385.1    | ribonuclease/angiogenin inhibitor 1 (RNH1)                                     |
| HNRPDL    | 2.07 | 1.45 NR_003249.1    | heterogeneous nuclear ribonucleoprotein D-like (HNRPDL)                        |
| VEZT      | 2.06 | 1.45 NM_017599.2    | vezatin                                                                        |
| MFSD11    | 2.02 | 1.45 NM_024311.2    | major facilitator superfamily domain containing 11 (MFSD11)                    |
| ODF2      | 1.96 | 1.45 NM_002540.3    | outer dense fiber of sperm tails 2 (ODF2)                                      |
| LOC642755 | 1.95 | 1.45 XM_926382.2    | PREDICTED: similar to DEXI                                                     |
| TGIF1     | 1.93 | 1.45 NM_170695.2    | TGFB-induced factor homeobox 1 (TGIF1)                                         |
| RPL37A    | 1.92 | 1.45 NM_000998.3    | ribosomal protein L37a (RPL37A)                                                |
| C2CD2     | 1.83 | 1.45 NM_015500.1    | C2 calcium-dependent domain containing 2 (C2CD2)                               |
| PAFAH1B1  | 1.76 | 1.45 NM_000430.2    | platelet-activating factor acetylhydrolase                                     |
| FAM162A   | 1.74 | 1.45 NM_014367.3    | family with sequence similarity 162                                            |
| RAB2B     | 1.72 | 1.45 NM_032846.2    | RAB2B                                                                          |
| SERP1     | 1.67 | 1.45 NM_014445.3    | stress-associated endoplasmic reticulum protein 1 (SERP1)                      |
| FAM83D    | 1.17 | 1.45 NM_030919.2    | family with sequence similarity 83                                             |
| PANK3     | 2.29 | 1.44 NM_024594.2    | pantothenate kinase 3 (PANK3)                                                  |
| IL28RA    | 2.23 | 1.44 NM_170743.2    | interleukin 28 receptor                                                        |
| PGBD3     | 2.21 | 1.44 NM_170753.1    | piggyBac transposable element derived 3 (PGBD3)                                |
| TMEM135   | 2.16 | 1.44 NM_022918.2    | transmembrane protein 135 (TMEM135)                                            |
| FOXP1     | 2.14 | 1.44 NM_032682.4    | forkhead box P1 (FOXP1)                                                        |
| ABCC5     | 2.13 | 1.44 NM_005688.2    | ATP-binding cassette                                                           |
| PSMD11    | 2.11 | 1.44 NM_002815.2    | proteasome (prosome)                                                           |
| TSC22D2   | 2.11 | 1.44 NM_014779.2    | TSC22 domain family                                                            |

|                  |      |      |                |                                                                                   |
|------------------|------|------|----------------|-----------------------------------------------------------------------------------|
| <b>SLC9A6</b>    | 2.06 | 1.44 | NM_001042537.1 | solute carrier family 9 (sodium/hydrogen exchanger)                               |
| <b>SEC22C</b>    | 2.05 | 1.44 | NM_032970.2    | SEC22 vesicle trafficking protein homolog C ( <i>S. cerevisiae</i> ) (SEC22C)     |
| <b>SDC1</b>      | 2.02 | 1.44 | NM_001006946.1 | syndecan 1 (SDC1)                                                                 |
| <b>DPP9</b>      | 1.99 | 1.44 | NM_139159.3    | dipeptidyl-peptidase 9 (DPP9)                                                     |
| <b>STARD10</b>   | 1.99 | 1.44 | NM_006645.2    | StAR-related lipid transfer (START) domain containing 10 (STARD10)                |
| <b>OTUB1</b>     | 1.98 | 1.44 | NR_003089.1    | OTU domain                                                                        |
| <b>STK38</b>     | 1.94 | 1.44 | NM_007271.2    | serine/threonine kinase 38 (STK38)                                                |
| <b>FASTKD3</b>   | 1.9  | 1.44 | NM_024091.2    | FAST kinase domains 3 (FASTKD3)                                                   |
| <b>MED29</b>     | 1.88 | 1.44 | NM_017592.1    | mediator complex subunit 29 (MED29)                                               |
| <b>ADAM19</b>    | 1.87 | 1.44 | NM_033274.2    | ADAM metalloproteinase domain 19 (meltrin beta) (ADAM19)                          |
| <b>PIGF</b>      | 1.79 | 1.44 | NM_002643.3    | phosphatidylinositol glycan anchor biosynthesis                                   |
| <b>CUL1</b>      | 1.78 | 1.44 | NM_003592.2    | cullin 1 (CUL1)                                                                   |
| <b>POLR3E</b>    | 1.77 | 1.44 | NM_018119.2    | polymerase (RNA) III (DNA directed) polypeptide E (80kD) (POLR3E)                 |
| <b>TACO1</b>     | 1.76 | 1.44 | NM_016360.2    | translational activator of mitochondrially encoded cytochrome c oxidase I (TACO1) |
| <b>GMNN</b>      | 1.75 | 1.44 | NM_015895.3    | geminin                                                                           |
| <b>MBNL2</b>     | 1.7  | 1.44 | NM_144778.2    | muscleblind-like 2 ( <i>Drosophila</i> ) (MBNL2)                                  |
| <b>MGST1</b>     | 1.7  | 1.44 | NM_020300.3    | microsomal glutathione S-transferase 1 (MGST1)                                    |
| <b>RAD23B</b>    | 1.65 | 1.44 | NM_002874.3    | RAD23 homolog B ( <i>S. cerevisiae</i> ) (RAD23B)                                 |
| <b>TXLNA</b>     | 1.63 | 1.44 | NM_175852.3    | taxilin alpha (TXLNA)                                                             |
| <b>FNDC3B</b>    | 1.39 | 1.44 | NM_001135095.1 | fibronectin type III domain containing 3B (FNDC3B)                                |
| <b>RNF217</b>    | 2.21 | 1.43 | NM_152553.2    | ring finger protein 217 (RNF217)                                                  |
| <b>TTC13</b>     | 2.18 | 1.43 | NM_024525.2    | tetratricopeptide repeat domain 13 (TTC13)                                        |
| <b>MTUS1</b>     | 2.15 | 1.43 | NM_001001924.1 | mitochondrial tumor suppressor 1 (MTUS1)                                          |
| <b>TESC</b>      | 2.09 | 1.43 | NM_017899.2    | tescalcin (TESC)                                                                  |
| <b>THBS1</b>     | 2.04 | 1.43 | NM_003246.2    | thrombospondin 1 (THBS1)                                                          |
| <b>TCEAL1</b>    | 2.03 | 1.43 | NM_001006639.1 | transcription elongation factor A (SII)-like 1 (TCEAL1)                           |
| <b>TMEM62</b>    | 1.99 | 1.43 | NM_024956.3    | transmembrane protein 62 (TMEM62)                                                 |
| <b>NKTR</b>      | 1.93 | 1.43 | NM_005385.3    | natural killer-tumor recognition sequence (NKTR)                                  |
| <b>DUSP22</b>    | 1.83 | 1.43 | NM_020185.3    | dual specificity phosphatase 22 (DUSP22)                                          |
| <b>LYPLA1</b>    | 1.8  | 1.43 | NM_006330.2    | lysophospholipase I (LYPLA1)                                                      |
| <b>CD83</b>      | 1.79 | 1.43 | NM_001040280.1 | CD83 molecule (CD83)                                                              |
| <b>DEDD2</b>     | 1.74 | 1.43 | NM_133328.2    | death effector domain containing 2 (DEDD2)                                        |
| <b>CCDC25</b>    | 1.69 | 1.43 | NM_018246.2    | coiled-coil domain containing 25 (CCDC25)                                         |
| <b>ELF2</b>      | 1.66 | 1.43 | NM_006874.2    | E74-like factor 2 (ets domain transcription factor) (ELF2)                        |
| <b>MUC1</b>      | 1.6  | 1.43 | NM_001044391.1 | mucin 1                                                                           |
| <b>CDC16</b>     | 1.56 | 1.43 | NM_003903.3    | cell division cycle 16 homolog ( <i>S. cerevisiae</i> ) (CDC16)                   |
| <b>C14orf4</b>   | 1.53 | 1.43 | NM_024496.2    | chromosome 14 open reading frame 4 (C14orf4)                                      |
| <b>TIRAP</b>     | 2.25 | 1.42 | NM_001039661.1 | toll-interleukin 1 receptor (TIR) domain containing adaptor protein (TIRAP)       |
| <b>MAP3K12</b>   | 2.24 | 1.42 | NM_006301.2    | mitogen-activated protein kinase kinase kinase 12 (MAP3K12)                       |
| <b>NR2F2</b>     | 2.08 | 1.42 | NM_021005.2    | nuclear receptor subfamily 2                                                      |
| <b>ZNF266</b>    | 2.07 | 1.42 | NM_006631.2    | zinc finger protein 266 (ZNF266)                                                  |
| <b>MSL1</b>      | 2.06 | 1.42 | NM_001012241.1 | male-specific lethal 1 homolog ( <i>Drosophila</i> ) (MSL1)                       |
| <b>C5orf41</b>   | 2.05 | 1.42 | NM_153607.1    | chromosome 5 open reading frame 41 (C5orf41)                                      |
| <b>USP1</b>      | 2.05 | 1.42 | NM_003368.4    | ubiquitin specific peptidase 1 (USP1)                                             |
| <b>LOC143666</b> | 2.02 | 1.42 | XM_001127524.1 | PREDICTED: hypothetical protein LOC143666 (LOC143666)                             |
| <b>ZNF706</b>    | 2.02 | 1.42 | NM_016096.3    | zinc finger protein 706 (ZNF706)                                                  |
| <b>STK38L</b>    | 2.01 | 1.42 | NM_015000.2    | serine/threonine kinase 38 like (STK38L)                                          |
| <b>CHRAC1</b>    | 1.99 | 1.42 | NM_017444.3    | chromatin accessibility complex 1 (CHRAC1)                                        |
| <b>CHST15</b>    | 1.99 | 1.42 | NM_015892.2    | carbohydrate (N-acetylgalactosamine 4-sulfate 6-O) sulfotransferase 15 (CHST15)   |



|                     |      |      |                |                                                                         |
|---------------------|------|------|----------------|-------------------------------------------------------------------------|
| <b>C18orf32</b>     | 1.97 | 1.42 | NM_001035005.2 | chromosome 18 open reading frame 32 (C18orf32)                          |
| <b>FAM117B</b>      | 1.97 | 1.42 | NM_173511.2    | family with sequence similarity 117                                     |
| <b>SLC2A3</b>       | 1.97 | 1.42 | NM_006931.1    | solute carrier family 2 (facilitated glucose transporter)               |
| <b>RNF103</b>       | 1.95 | 1.42 | NM_005667.2    | ring finger protein 103 (RNF103)                                        |
| <b>FECH</b>         | 1.94 | 1.42 | NM_000140.2    | ferrochelataase (protoporphyrin) (FECH)                                 |
| <b>CDC40</b>        | 1.89 | 1.42 | NM_015891.2    | cell division cycle 40 homolog (S. cerevisiae) (CDC40)                  |
| <b>ITFG1</b>        | 1.88 | 1.42 | NM_030790.3    | integrin alpha FG-GAP repeat containing 1 (ITFG1)                       |
| <b>PTP4A1</b>       | 1.88 | 1.42 | NM_003463.3    | protein tyrosine phosphatase type IVA                                   |
| <b>CMTM4</b>        | 1.83 | 1.42 | NM_181521.2    | CKLF-like MARVEL transmembrane domain containing 4 (CMTM4)              |
| <b>DERL2</b>        | 1.81 | 1.42 | NM_016041.3    | Der1-like domain family                                                 |
| <b>ZCCHC14</b>      | 1.78 | 1.42 | NM_015144.2    | zinc finger                                                             |
| <b>STC2</b>         | 1.74 | 1.42 | NM_003714.2    | stanniocalcin 2 (STC2)                                                  |
| <b>SMEK2</b>        | 1.69 | 1.42 | NM_020463.1    | SMEK homolog 2                                                          |
| <b>DNAJC12</b>      | 1.62 | 1.42 | NM_021800.2    | DnaJ (Hsp40) homolog                                                    |
| <b>CSK</b>          | 1.59 | 1.42 | NM_004383.1    | c-src tyrosine kinase (CSK)                                             |
| <b>GOLGA8B</b>      | 1.53 | 1.42 | NM_001023567.2 | golgi autoantigen                                                       |
| <b>CMIP</b>         | 1.5  | 1.42 | NM_030629.1    | c-Maf-inducing protein (CMIP)                                           |
| <b>SLC25A12</b>     | 2.09 | 1.41 | NM_003705.2    | solute carrier family 25 (mitochondrial carrier)                        |
| <b>ULK3</b>         | 2.08 | 1.41 | NM_001099436.1 | unc-51-like kinase 3 (C. elegans) (ULK3)                                |
| <b>EYA4</b>         | 2.04 | 1.41 | NM_004100.3    | eyes absent homolog 4 (Drosophila) (EYA4)                               |
| <b>LIAS</b>         | 2.01 | 1.41 | NM_006859.2    | lipoic acid synthetase (LIAS)                                           |
| <b>PANK1</b>        | 1.99 | 1.41 | NM_148978.1    | pantothenate kinase 1 (PANK1)                                           |
| <b>IL11RA</b>       | 1.98 | 1.41 | NM_004512.3    | interleukin 11 receptor                                                 |
| <b>PAN3</b>         | 1.93 | 1.41 | NM_175854.5    | PAN3 polyA specific ribonuclease subunit homolog (S. cerevisiae) (PAN3) |
| <b>TMEM199</b>      | 1.92 | 1.41 | NM_152464.1    | transmembrane protein 199 (TMEM199)                                     |
| <b>NSF</b>          | 1.9  | 1.41 | NM_006178.1    | PREDICTED: N-ethylmaleimide-sensitive factor (NSF)                      |
| <b>NEIL2</b>        | 1.88 | 1.41 | NM_145043.1    | nei like 2 (E. coli) (NEIL2)                                            |
| <b>C14orf135</b>    | 1.87 | 1.41 | NM_022495.5    | chromosome 14 open reading frame 135 (C14orf135)                        |
| <b>PKNOX1</b>       | 1.87 | 1.41 | NM_004571.3    | PBX/knotted 1 homeobox 1 (PKNOX1)                                       |
| <b>FBXO28</b>       | 1.8  | 1.41 | NM_015176.1    | F-box protein 28 (FBXO28)                                               |
| <b>LHFPL2</b>       | 1.78 | 1.41 | NM_005779.1    | lipoma HMGIC fusion partner-like 2 (LHFPL2)                             |
| <b>PTPN1</b>        | 1.78 | 1.41 | NM_002827.2    | protein tyrosine phosphatase                                            |
| <b>HIAT1</b>        | 1.76 | 1.41 | NM_033055.2    | hippocampus abundant transcript 1 (HIAT1)                               |
| <b>KLF6</b>         | 1.74 | 1.41 | NM_001300.4    | Kruppel-like factor 6 (KLF6)                                            |
| <b>DULLARD</b>      | 1.69 | 1.41 | NM_015343.3    | dullard homolog (Xenopus laevis) (DULLARD)                              |
| <b>C4orf34</b>      | 1.65 | 1.41 | NM_174921.1    | chromosome 4 open reading frame 34 (C4orf34)                            |
| <b>NCBP2</b>        | 1.65 | 1.41 | NM_007362.3    | nuclear cap binding protein subunit 2                                   |
| <b>CDV3</b>         | 1.59 | 1.41 | NM_017548.3    | PREDICTED: CDV3 homolog (mouse)                                         |
| <b>DHPS</b>         | 1.52 | 1.41 | NM_013406.1    | deoxyhypusine synthase (DHPS)                                           |
| <b>SEL1L3</b>       | 1.3  | 1.41 | NM_015187.3    | sel-1 suppressor of lin-12-like 3 (C. elegans) (SEL1L3)                 |
| <b>DCAF6</b>        | 1.06 | 1.41 | NM_001017977.1 | DDB1 and CUL4 associated factor 6 (DCAF6)                               |
| <b>PCNXL2</b>       | 2.16 | 1.4  | NM_014801.3    | pecanex-like 2 (Drosophila) (PCNXL2)                                    |
| <b>HCG18</b>        | 2.09 | 1.4  | XM_944855.1    | PREDICTED: HLA complex group 18 (HCG18)                                 |
| <b>LOC100130171</b> | 2.04 | 1.4  | XR_038676.1    | PREDICTED: misc_RNA (LOC100130171)                                      |
| <b>LOC92659</b>     | 2.04 | 1.4  | NR_015454.1    | hypothetical LOC92659 (LOC92659)                                        |
| <b>LPGAT1</b>       | 2.04 | 1.4  | NM_014873.1    | lysophosphatidylglycerol acyltransferase 1 (LPGAT1)                     |
| <b>TOPORS</b>       | 2.04 | 1.4  | NM_005802.2    | topoisomerase I binding                                                 |
| <b>PGP</b>          | 2.03 | 1.4  | NM_001042371.2 | phosphoglycolate phosphatase (PGP)                                      |
| <b>C6orf85</b>      | 2.01 | 1.4  | NM_021945.4    | chromosome 6 open reading frame 85 (C6orf85)                            |

|                  |      |      |                |                                                                     |
|------------------|------|------|----------------|---------------------------------------------------------------------|
| <b>TMEM134</b>   | 1.98 | 1.4  | NM_001078651.1 | transmembrane protein 134 (TMEM134)                                 |
| <b>ZNF12</b>     | 1.97 | 1.4  | NM_016265.3    | zinc finger protein 12 (ZNF12)                                      |
| <b>KCTD14</b>    | 1.96 | 1.4  | NM_023930.3    | potassium channel tetramerisation domain containing 14 (KCTD14)     |
| <b>RAN</b>       | 1.86 | 1.4  | NM_006325.2    | RAN                                                                 |
| <b>BCL2L2</b>    | 1.85 | 1.4  | NM_004050.2    | BCL2-like 2 (BCL2L2)                                                |
| <b>SLC43A3</b>   | 1.83 | 1.4  | NM_014096.2    | solute carrier family 43                                            |
| <b>SLTM</b>      | 1.79 | 1.4  | NM_024755.2    | SAFB-like                                                           |
| <b>IFIT1</b>     | 1.72 | 1.4  | NM_001548.3    | interferon-induced protein with tetratricopeptide repeats 1 (IFIT1) |
| <b>FOXJ2</b>     | 1.69 | 1.4  | NM_018416.2    | forkhead box J2 (FOXJ2)                                             |
| <b>NCLN</b>      | 1.68 | 1.4  | NM_020170.3    | nicalin homolog (zebrafish) (NCLN)                                  |
| <b>KPNA3</b>     | 1.67 | 1.4  | NM_002267.2    | karyopherin alpha 3 (importin alpha 4) (KPNA3)                      |
| <b>CALU</b>      | 1.59 | 1.4  | NM_001219.2    | calumenin (CALU)                                                    |
| <b>HNRPH3</b>    | 1.45 | 1.4  | NM_012207.1    | heterogeneous nuclear ribonucleoprotein H3 (2H9) (HNRPH3)           |
| <b>ACSL4</b>     | 1.25 | 1.4  | NM_004458.1    | acyl-CoA synthetase long-chain family member 4 (ACSL4)              |
| <b>OSGEPL1</b>   | 2.12 | 1.39 | NM_022353.2    | O-sialoglycoprotein endopeptidase-like 1 (OSGEPL1)                  |
| <b>ZBTB47</b>    | 2.08 | 1.39 | NM_145166.2    | zinc finger and BTB domain containing 47 (ZBTB47)                   |
| <b>NR2C2</b>     | 2.03 | 1.39 | NM_003298.3    | nuclear receptor subfamily 2                                        |
| <b>SMARCC2</b>   | 2.03 | 1.39 | NM_139067.1    | SWI/SNF related                                                     |
| <b>GSTM3</b>     | 1.97 | 1.39 | NM_000849.3    | glutathione S-transferase M3 (brain) (GSTM3)                        |
| <b>FAM72D</b>    | 1.94 | 1.39 | NM_207418.2    | PREDICTED: family with sequence similarity 72                       |
| <b>SERAC1</b>    | 1.94 | 1.39 | NM_032861.2    | serine active site containing 1 (SERAC1)                            |
| <b>NPEPL1</b>    | 1.93 | 1.39 | NM_024663.3    | aminopeptidase-like 1 (NPEPL1)                                      |
| <b>LOC440030</b> | 1.88 | 1.39 | XM_498510.2    | PREDICTED: hypothetical LOC440030 (LOC440030)                       |
| <b>CLPTM1</b>    | 1.84 | 1.39 | NM_001294.1    | cleft lip and palate associated transmembrane protein 1 (CLPTM1)    |
| <b>LOC645166</b> | 1.84 | 1.39 | XM_001129441.2 | PREDICTED: similar to lymphocyte-specific protein 1 (LOC645166)     |
| <b>IQCK</b>      | 1.79 | 1.39 | NM_153208.1    | IQ motif containing K (IQCK)                                        |
| <b>BCAT1</b>     | 1.75 | 1.39 | NM_005504.4    | branched chain aminotransferase 1                                   |
| <b>CP110</b>     | 1.73 | 1.39 | NM_014711.3    | CP110 protein (CP110)                                               |
| <b>HS6ST2</b>    | 1.73 | 1.39 | NM_147175.3    | heparan sulfate 6-O-sulfotransferase 2 (HS6ST2)                     |
| <b>ERI1</b>      | 1.71 | 1.39 | NM_153332.3    | exoribonuclease 1 (ERI1)                                            |
| <b>TNFSF9</b>    | 1.71 | 1.39 | NM_003811.2    | tumor necrosis factor (ligand) superfamily                          |
| <b>RQCD1</b>     | 1.69 | 1.39 | NM_005444.1    | RCD1 required for cell differentiation1 homolog (S. pombe) (RQCD1)  |
| <b>SBDS</b>      | 1.57 | 1.39 | NM_016038.2    | Shwachman-Bodian-Diamond syndrome (SBDS)                            |
| <b>JARID2</b>    | 1.56 | 1.39 | NM_004973.2    | jumonji                                                             |
| <b>LRRC58</b>    | 1.56 | 1.39 | NM_001099678.1 | leucine rich repeat containing 58 (LRRC58)                          |
| <b>FNDC3B</b>    | 1.22 | 1.39 | NM_022763.3    | fibronectin type III domain containing 3B (FNDC3B)                  |
| <b>KIAA1715</b>  | 2.03 | 1.38 | NM_030650.1    | KIAA1715 (KIAA1715)                                                 |
| <b>WDR20</b>     | 2.01 | 1.38 | NM_181308.1    | WD repeat domain 20 (WDR20)                                         |
| <b>MKNK2</b>     | 1.95 | 1.38 | NM_199054.2    | MAP kinase interacting serine/threonine kinase 2 (MKNK2)            |
| <b>DEF8</b>      | 1.93 | 1.38 | NM_207514.1    | differentially expressed in FDCP 8 homolog (mouse) (DEF8)           |
| <b>GPR137C</b>   | 1.93 | 1.38 | NM_001099652.1 | G protein-coupled receptor 137C (GPR137C)                           |
| <b>SPIN3</b>     | 1.93 | 1.38 | NM_001010862.1 | spindlin family                                                     |
| <b>IFI30</b>     | 1.92 | 1.38 | NM_006332.3    | interferon                                                          |
| <b>MXD1</b>      | 1.92 | 1.38 | NM_002357.2    | MAX dimerization protein 1 (MXD1)                                   |
| <b>LRRC57</b>    | 1.89 | 1.38 | NM_153260.1    | leucine rich repeat containing 57 (LRRC57)                          |
| <b>TRIM37</b>    | 1.88 | 1.38 | NM_015294.2    | tripartite motif-containing 37 (TRIM37)                             |
| <b>PCGF2</b>     | 1.87 | 1.38 | NM_007144.2    | polycomb group ring finger 2 (PCGF2)                                |
| <b>TMEM51</b>    | 1.87 | 1.38 | NM_018022.1    | transmembrane protein 51 (TMEM51)                                   |
| <b>SLC35F5</b>   | 1.86 | 1.38 | NM_025181.2    | solute carrier family 35                                            |

|              |      |                     |                                                                                |
|--------------|------|---------------------|--------------------------------------------------------------------------------|
| WRN          | 1.84 | 1.38 NM_000553.3    | Werner syndrome                                                                |
| RGL1         | 1.82 | 1.38 NM_015149.3    | ral guanine nucleotide dissociation stimulator-like 1 (RGL1)                   |
| NMD3         | 1.76 | 1.38 NM_015938.3    | NMD3 homolog (S. cerevisiae) (NMD3)                                            |
| CBX1         | 1.72 | 1.38 NM_006807.3    | chromobox homolog 1 (HP1 beta homolog Drosophila ) (CBX1)                      |
| C14orf135    | 1.7  | 1.38 NM_022495.3    | chromosome 14 open reading frame 135 (C14orf135)                               |
| CENTG2       | 1.66 | 1.38 NM_014914.2    | centaurin                                                                      |
| BAZ1B        | 1.65 | 1.38 NM_023005.2    | bromodomain adjacent to zinc finger domain                                     |
| SDHC         | 1.61 | 1.38 NM_003001.2    | succinate dehydrogenase complex                                                |
| LOC647081    | 1.59 | 1.38 XR_017490.2    | PREDICTED: misc_RNA (LOC647081)                                                |
| TRAK1        | 1.58 | 1.38 NM_001042646.1 | trafficking protein                                                            |
| RNF114       | 1.56 | 1.38 NM_018683.3    | ring finger protein 114 (RNF114)                                               |
| IGF2BP3      | 1.35 | 1.38 NM_006547.2    | insulin-like growth factor 2 mRNA binding protein 3 (IGF2BP3)                  |
| BAG1         | 1.97 | 1.37 NM_004323.4    | BCL2-associated athanogene (BAG1)                                              |
| ACTR1B       | 1.92 | 1.37 NM_005735.2    | ARP1 actin-related protein 1 homolog B                                         |
| ASB1         | 1.86 | 1.37 NM_016114.3    | ankyrin repeat and SOCS box-containing 1 (ASB1)                                |
| XPO7         | 1.85 | 1.37 NM_015024.2    | exportin 7 (XPO7)                                                              |
| ANKMY2       | 1.82 | 1.37 NM_020319.1    | ankyrin repeat and MYND domain containing 2 (ANKMY2)                           |
| XRCC1        | 1.82 | 1.37 NM_006297.1    | X-ray repair complementing defective repair in Chinese hamster cells 1 (XRCC1) |
| BTBD10       | 1.77 | 1.37 NM_032320.5    | BTB (POZ) domain containing 10 (BTBD10)                                        |
| GTF2H1       | 1.76 | 1.37 NM_005316.2    | general transcription factor IIH                                               |
| MEMO1        | 1.76 | 1.37 NM_015955.2    | mediator of cell motility 1 (MEMO1)                                            |
| TANC2        | 1.74 | 1.37 NM_025185.3    | tetratricopeptide repeat                                                       |
| CDKN1B       | 1.51 | 1.37 NM_004064.2    | cyclin-dependent kinase inhibitor 1B (p27)                                     |
| CUL4A        | 1.02 | 1.37 NM_003589.2    | cullin 4A (CUL4A)                                                              |
| ABCB9        | 1.98 | 1.36 NM_019624.2    | ATP-binding cassette                                                           |
| C1orf96      | 1.97 | 1.36 NM_145257.2    | chromosome 1 open reading frame 96 (C1orf96)                                   |
| COG5         | 1.97 | 1.36 NM_006348.2    | component of oligomeric golgi complex 5 (COG5)                                 |
| RP5-1022P6.2 | 1.97 | 1.36 NM_019593.3    | hypothetical protein KIAA1434 (RP5-1022P6.2)                                   |
| BNIP1        | 1.95 | 1.36 NM_013980.2    | BCL2/adenovirus E1B 19kDa interacting protein 1 (BNIP1)                        |
| CICE         | 1.95 | 1.36 XR_000206.4    | PREDICTED: cell death-inducing CIDE-like effector pseudogene (CICE)            |
| ZNF512B      | 1.94 | 1.36 NM_020713.1    | zinc finger protein 512B (ZNF512B)                                             |
| LOC391692    | 1.93 | 1.36 XM_373031.3    | PREDICTED: similar to tubulin                                                  |
| SHARPIN      | 1.88 | 1.36 NM_030974.2    | SHANK-associated RH domain interactor (SHARPIN)                                |
| B4GALT2      | 1.86 | 1.36 NM_003780.3    | UDP-Gal:betaGlcNAc beta 1                                                      |
| WDR37        | 1.86 | 1.36 NM_014023.3    | WD repeat domain 37 (WDR37)                                                    |
| FAM86A       | 1.85 | 1.36 NM_201598.1    | family with sequence similarity 86                                             |
| TEX261       | 1.83 | 1.36 NM_144582.2    | testis expressed 261 (TEX261)                                                  |
| ZFAND6       | 1.8  | 1.36 NM_019006.2    | zinc finger                                                                    |
| BUB1         | 1.76 | 1.36 NM_004336.2    | BUB1 budding uninhibited by benzimidazoles 1 homolog (yeast) (BUB1)            |
| MAP3K2       | 1.72 | 1.36 XM_001128799.1 | PREDICTED: mitogen-activated protein kinase kinase kinase 2                    |
| SPHK2        | 1.71 | 1.36 NM_020126.3    | sphingosine kinase 2 (SPHK2)                                                   |
| MFSD5        | 1.7  | 1.36 NM_032889.3    | major facilitator superfamily domain containing 5 (MFSD5)                      |
| RBL2         | 1.68 | 1.36 NM_005611.2    | retinoblastoma-like 2 (p130) (RBL2)                                            |
| FEM1C        | 1.65 | 1.36 NM_020177.2    | fem-1 homolog c (C. elegans) (FEM1C)                                           |
| PLCXD1       | 1.65 | 1.36 NM_018390.2    | Yp11.32c                                                                       |
| ATG5         | 1.64 | 1.36 NM_004849.1    | ATG5 autophagy related 5 homolog (S. cerevisiae) (ATG5)                        |
| LARP4B       | 1.64 | 1.36 NM_015155.1    | La ribonucleoprotein domain family                                             |
| LOC100128337 | 1.62 | 1.36 XR_037222.1    | PREDICTED: misc_RNA (LOC100128337)                                             |
| SNX4         | 1.58 | 1.36 NM_003794.2    | sorting nexin 4 (SNX4)                                                         |

|              |      |                     |                                                                            |
|--------------|------|---------------------|----------------------------------------------------------------------------|
| LOC645251    | 1.56 | 1.36 XR_037203.1    | PREDICTED: misc_RNA (LOC645251)                                            |
| LOC146517    | 1.5  | 1.36 XM_928464.1    | PREDICTED: hypothetical protein LOC146517 (LOC146517)                      |
| WBSCR22      | 1.4  | 1.36 NM_017528.2    | Williams Beuren syndrome chromosome region 22 (WBSCR22)                    |
| CHCHD10      | 1.12 | 1.36 NM_213720.1    | coiled-coil-helix-coiled-coil-helix domain containing 10 (CHCHD10)         |
| FBS1         | 1.91 | 1.35 NM_022452.1    | fibrosin 1 (FBS1)                                                          |
| LOC100134053 | 1.84 | 1.35 XM_001717094.1 | PREDICTED: similar to POLR2J4 protein (LOC100134053)                       |
| NRP1         | 1.83 | 1.35 NM_003873.4    | neuropilin 1 (NRP1)                                                        |
| PAFAH2       | 1.82 | 1.35 NM_000437.3    | platelet-activating factor acetylhydrolase 2                               |
| RSBN1L       | 1.81 | 1.35 NM_198467.1    | round spermatid basic protein 1-like (RSBN1L)                              |
| ACSS2        | 1.8  | 1.35 NM_001076552.1 | acyl-CoA synthetase short-chain family member 2 (ACSS2)                    |
| DNM1L        | 1.79 | 1.35 NM_012063.1    | dynamamin 1-like (DNM1L)                                                   |
| CHST14       | 1.78 | 1.35 NM_130468.2    | carbohydrate (N-acetylgalactosamine 4-O) sulfotransferase 14 (CHST14)      |
| PHLDA3       | 1.78 | 1.35 NM_012396.3    | pleckstrin homology-like domain                                            |
| TLK1         | 1.77 | 1.35 NM_012290.3    | tousled-like kinase 1 (TLK1)                                               |
| DLEU1        | 1.73 | 1.35 NR_002605.1    | deleted in lymphocytic leukemia 1 (non-protein coding) (DLEU1)             |
| ACSS2        | 1.72 | 1.35 NM_018677.2    | acyl-CoA synthetase short-chain family member 2 (ACSS2)                    |
| HS2ST1       | 1.72 | 1.35 NM_012262.2    | heparan sulfate 2-O-sulfotransferase 1 (HS2ST1)                            |
| NICN1        | 1.67 | 1.35 NM_032316.3    | nicolin 1 (NICN1)                                                          |
| MBP          | 1.64 | 1.35 NM_001025100.1 | myelin basic protein (MBP)                                                 |
| TSPAN4       | 1.6  | 1.35 NM_001025235.1 | tetraspanin 4 (TSPAN4)                                                     |
| C6orf129     | 1.56 | 1.35 NM_138493.2    | chromosome 6 open reading frame 129 (C6orf129)                             |
| PHF15        | 1.52 | 1.35 NM_015288.4    | PHD finger protein 15 (PHF15)                                              |
| DEPDC1B      | 1.51 | 1.35 NM_018369.1    | DEP domain containing 1B (DEPDC1B)                                         |
| CNOT8        | 1.31 | 1.35 NM_004779.4    | CCR4-NOT transcription complex                                             |
| AVPI1        | 0.57 | 1.35 NM_021732.1    | arginine vasopressin-induced 1 (AVPI1)                                     |
| SNORD17      | 1.86 | 1.34 NR_003045.1    | small nucleolar RNA                                                        |
| GRAMD3       | 1.81 | 1.34 NM_023927.1    | GRAM domain containing 3 (GRAMD3)                                          |
| IPO5         | 1.81 | 1.34 NM_002271.4    | importin 5 (IPO5)                                                          |
| HSPC157      | 1.78 | 1.34 NR_023919.1    | hypothetical LOC29092 (HSPC157)                                            |
| NIPAL4       | 1.77 | 1.34 NM_001099287.1 | NIPA-like domain containing 4 (NIPAL4)                                     |
| PKMYT1       | 1.76 | 1.34 NM_182687.1    | protein kinase                                                             |
| NPTX1        | 1.73 | 1.34 NM_002522.2    | PREDICTED: neuronal pentraxin I (NPTX1)                                    |
| C1orf216     | 1.69 | 1.34 NM_152374.1    | chromosome 1 open reading frame 216 (C1orf216)                             |
| BCL7B        | 1.63 | 1.34 NM_138707.1    | B-cell CLL/lymphoma 7B (BCL7B)                                             |
| ELMO2        | 1.59 | 1.34 NM_133171.2    | engulfment and cell motility 2 (ELMO2)                                     |
| YPEL3        | 1.58 | 1.34 NM_031477.4    | yippee-like 3 (Drosophila) (YPEL3)                                         |
| CCNE1        | 1.57 | 1.34 NM_057182.1    | cyclin E1 (CCNE1)                                                          |
| KLHL28       | 1.56 | 1.34 NM_017658.3    | kelch-like 28 (Drosophila) (KLHL28)                                        |
| TFB1M        | 1.55 | 1.34 NM_016020.1    | transcription factor B1                                                    |
| ABL1         | 1.13 | 1.34 NM_005157.3    | c-abl oncogene 1                                                           |
| ASB6         | 1.87 | 1.33 NM_177999.1    | ankyrin repeat and SOCS box-containing 6 (ASB6)                            |
| KIAA1602     | 1.81 | 1.33 NM_020941.1    | KIAA1602 (KIAA1602)                                                        |
| RMND5B       | 1.81 | 1.33 NM_022762.3    | required for meiotic nuclear division 5 homolog B (S. cerevisiae) (RMND5B) |
| KIAA1128     | 1.78 | 1.33 NM_018999.1    | KIAA1128 (KIAA1128)                                                        |
| RECK         | 1.76 | 1.33 NM_021111.1    | reversion-inducing-cysteine-rich protein with kazal motifs (RECK)          |
| AZI2         | 1.73 | 1.33 NM_022461.2    | 5-azacytidine induced 2 (AZI2)                                             |
| BRE          | 1.67 | 1.33 NM_199191.1    | brain and reproductive organ-expressed (TNFRSF1A modulator) (BRE)          |
| PIGB         | 1.62 | 1.33 NM_004855.4    | phosphatidylinositol glycan anchor biosynthesis                            |
| BRE          | 1.61 | 1.33 NM_199192.1    | brain and reproductive organ-expressed (TNFRSF1A modulator) (BRE)          |

|                     |      |                     |                                                                                |
|---------------------|------|---------------------|--------------------------------------------------------------------------------|
| <b>OTUD1</b>        | 1.6  | 1.33 XM_939698.1    | PREDICTED: OTU domain containing 1 (OTUD1)                                     |
| <b>ARID3A</b>       | 1.59 | 1.33 NM_005224.2    | AT rich interactive domain 3A (BRIGHT-like) (ARID3A)                           |
| <b>MAPK9</b>        | 1.59 | 1.33 NM_002752.3    | mitogen-activated protein kinase 9 (MAPK9)                                     |
| <b>RAB23</b>        | 1.59 | 1.33 NM_016277.3    | RAB23                                                                          |
| <b>SLC25A25</b>     | 1.59 | 1.33 NM_052901.2    | solute carrier family 25 (mitochondrial carrier; phosphate carrier)            |
| <b>RALBP1</b>       | 1.56 | 1.33 NM_006788.3    | ralA binding protein 1 (RALBP1)                                                |
| <b>PRAGMIN</b>      | 1.55 | 1.33 NM_001080826.1 | homolog of rat pragma of Rnd2 (PRAGMIN)                                        |
| <b>METAP1</b>       | 1.07 | 1.33 NM_015143.1    | methionyl aminopeptidase 1 (METAP1)                                            |
| <b>ARF1</b>         | 0.57 | 1.33 NM_001024227.1 | ADP-ribosylation factor 1 (ARF1)                                               |
| <b>SLC20A2</b>      | 1.83 | 1.32 NM_006749.3    | solute carrier family 20 (phosphate transporter)                               |
| <b>SOCS5</b>        | 1.83 | 1.32 NM_144949.2    | suppressor of cytokine signaling 5 (SOCS5)                                     |
| <b>STRN4</b>        | 1.77 | 1.32 NM_001039877.1 | striatin                                                                       |
| <b>C10orf32</b>     | 1.76 | 1.32 NM_144591.1    | chromosome 10 open reading frame 32 (C10orf32)                                 |
| <b>LOC100130746</b> | 1.75 | 1.32 XR_038468.1    | PREDICTED: misc_RNA (LOC100130746)                                             |
| <b>CYB561D1</b>     | 1.7  | 1.32 NM_182580.2    | cytochrome b-561 domain containing 1 (CYB561D1)                                |
| <b>AADAACL1</b>     | 1.65 | 1.32 NM_020792.3    | arylacetamide deacetylase-like 1 (AADAACL1)                                    |
| <b>ENO2</b>         | 1.65 | 1.32 NM_001975.2    | enolase 2 (gamma)                                                              |
| <b>EXOSC5</b>       | 1.61 | 1.32 NM_020158.3    | exosome component 5 (EXOSC5)                                                   |
| <b>COL4A4</b>       | 1.59 | 1.32 NM_000092.4    | collagen                                                                       |
| <b>EPS8</b>         | 1.59 | 1.32 NM_004447.4    | epidermal growth factor receptor pathway substrate 8 (EPS8)                    |
| <b>LOC100130886</b> | 1.54 | 1.32 XM_001714477.1 | PREDICTED: hypothetical protein LOC100130886 (LOC100130886)                    |
| <b>CPEB2</b>        | 1.52 | 1.32 NM_182646.1    | cytoplasmic polyadenylation element binding protein 2 (CPEB2)                  |
| <b>CLDND1</b>       | 1.41 | 1.32 NM_001040181.1 | claudin domain containing 1 (CLDND1)                                           |
| <b>UBA6</b>         | 1.33 | 1.32 NM_018227.5    | ubiquitin-like modifier activating enzyme 6 (UBA6)                             |
| <b>IL8</b>          | 1.29 | 1.32 NM_000584.2    | interleukin 8 (IL8)                                                            |
| <b>DPYSL3</b>       | 0.9  | 1.32 NM_001387.2    | dihydropyrimidinase-like 3 (DPYSL3)                                            |
| <b>HERC5</b>        | 0.75 | 1.32 NM_016323.2    | hect domain and RLD 5 (HERC5)                                                  |
| <b>HIST1H2BK</b>    | 0.15 | 1.32 NM_080593.1    | histone cluster 1                                                              |
| <b>PTP4A2</b>       | 0.09 | 1.32 NM_080392.2    | PREDICTED: protein tyrosine phosphatase type IVA                               |
| <b>CLCN6</b>        | 1.8  | 1.31 NM_001286.2    | chloride channel 6 (CLCN6)                                                     |
| <b>LOC100133609</b> | 1.78 | 1.31 XM_001720815.1 | PREDICTED: similar to membrane-associated ring finger (C3HC4) 3 (LOC100133609) |
| <b>DHDDS</b>        | 1.74 | 1.31 NM_024887.2    | dehydrodolichyl diphosphate synthase (DHDDS)                                   |
| <b>PGP</b>          | 1.7  | 1.31 NM_001042371.2 | phosphoglycolate phosphatase (PGP)                                             |
| <b>SLC43A3</b>      | 1.68 | 1.31 NM_017611.2    | solute carrier family 43                                                       |
| <b>TMEM206</b>      | 1.68 | 1.31 NM_018252.2    | transmembrane protein 206 (TMEM206)                                            |
| <b>FAH</b>          | 1.67 | 1.31 NM_000137.1    | fumarylacetoacetate hydrolase (fumarylacetoacetase) (FAH)                      |
| <b>GLS</b>          | 1.67 | 1.31 NM_014905.2    | glutaminase (GLS)                                                              |
| <b>FAM8A1</b>       | 1.65 | 1.31 NM_016255.1    | family with sequence similarity 8                                              |
| <b>LNX2</b>         | 1.64 | 1.31 NM_153371.3    | ligand of numb-protein X 2 (LNX2)                                              |
| <b>TMEM167B</b>     | 1.63 | 1.31 NM_020141.3    | transmembrane protein 167B (TMEM167B)                                          |
| <b>MKNK1</b>        | 1.62 | 1.31 NM_003684.3    | MAP kinase interacting serine/threonine kinase 1 (MKNK1)                       |
| <b>SMAD7</b>        | 1.62 | 1.31 NM_005904.2    | SMAD family member 7 (SMAD7)                                                   |
| <b>C5orf33</b>      | 1.6  | 1.31 NM_153013.3    | chromosome 5 open reading frame 33 (C5orf33)                                   |
| <b>ARRDC3</b>       | 1.59 | 1.31 NM_020801.1    | arrestin domain containing 3 (ARRDC3)                                          |
| <b>AMMECR1L</b>     | 1.54 | 1.31 NM_031445.2    | AMME chromosomal region gene 1-like (AMMECR1L)                                 |
| <b>KIAA0240</b>     | 1.53 | 1.31 NM_015349.1    | KIAA0240 (KIAA0240)                                                            |
| <b>AGGF1</b>        | 1.49 | 1.31 NM_018046.3    | angiogenic factor with G patch and FHA domains 1 (AGGF1)                       |
| <b>DHX40</b>        | 1.11 | 1.31 NM_024612.3    | PREDICTED: DEAH (Asp-Glu-Ala-His) box polypeptide 40                           |
| <b>TUBB6</b>        | 1.03 | 1.31 XM_940079.1    | PREDICTED: tubulin                                                             |

|              |      |      |                |                                                                                                 |
|--------------|------|------|----------------|-------------------------------------------------------------------------------------------------|
| CHURC1       | 0.94 | 1.31 | NM_145165.2    | churchill domain containing 1 (CHURC1)                                                          |
| LOC442229    | 1.84 | 1.3  | XM_936681.1    | PREDICTED: similar to mitochondrial carrier triple repeat 1 (LOC442229)                         |
| JMJD4        | 1.79 | 1.3  | NM_023007.1    | jumonji domain containing 4 (JMJD4)                                                             |
| CDC42BPA     | 1.71 | 1.3  | NM_003607.3    | CDC42 binding protein kinase alpha (DMPK-like) (CDC42BPA)                                       |
| FUT4         | 1.7  | 1.3  | NM_002033.2    | fucosyltransferase 4 (alpha 1)                                                                  |
| DPY19L4      | 1.68 | 1.3  | NM_181787.1    | dpy-19-like 4 (C. elegans) (DPY19L4)                                                            |
| GCNT2        | 1.65 | 1.3  | NM_001491.2    | glucosaminyl (N-acetyl) transferase 2                                                           |
| THAP1        | 1.65 | 1.3  | NM_018105.2    | THAP domain containing                                                                          |
| TMEM19       | 1.65 | 1.3  | NM_018279.3    | transmembrane protein 19 (TMEM19)                                                               |
| ADI1         | 1.64 | 1.3  | NM_018269.1    | acireductone dioxygenase 1 (ADI1)                                                               |
| GLRB         | 1.63 | 1.3  | NM_000824.2    | glycine receptor                                                                                |
| ZNF706       | 1.63 | 1.3  | NM_001042511.1 | zinc finger protein 706 (ZNF706)                                                                |
| TP53BP2      | 1.61 | 1.3  | NM_001031685.2 | tumor protein p53 binding protein                                                               |
| MYNN         | 1.6  | 1.3  | NM_018657.3    | myoneurin (MYNN)                                                                                |
| SEPN1        | 1.6  | 1.3  | NM_206926.1    | selenoprotein N                                                                                 |
| GRB10        | 1.59 | 1.3  | NM_005311.3    | growth factor receptor-bound protein 10 (GRB10)                                                 |
| LOC100130707 | 1.59 | 1.3  | XM_001713657.1 | PREDICTED: hypothetical protein LOC100130707 (LOC100130707)                                     |
| VAV3         | 1.57 | 1.3  | NM_006113.4    | vav 3 guanine nucleotide exchange factor (VAV3)                                                 |
| APPL1        | 1.56 | 1.3  | NM_012096.2    | adaptor protein                                                                                 |
| C17orf42     | 1.54 | 1.3  | NM_024683.3    | chromosome 17 open reading frame 42 (C17orf42)                                                  |
| MTMR11       | 1.54 | 1.3  | NM_181873.2    | myotubularin related protein 11 (MTMR11)                                                        |
| LOC389599    | 1.53 | 1.3  | XM_001131588.1 | PREDICTED: similar to amyotrophic lateral sclerosis 2 (juvenile) chromosome region              |
| LCLAT1       | 1.52 | 1.3  | NM_182551.3    | lysocardiolipin acyltransferase 1 (LCLAT1)                                                      |
| CLDND1       | 1.24 | 1.3  | NM_001040181.1 | claudin domain containing 1 (CLDND1)                                                            |
| DYNC1LI2     | 0.87 | 1.3  | NM_006141.2    | dynein                                                                                          |
| LHX6         | 1.7  | 1.29 | NM_199160.2    | LIM homeobox 6 (LHX6)                                                                           |
| NRP1         | 1.68 | 1.29 | NM_001024629.1 | neuropilin 1 (NRP1)                                                                             |
| KIAA0100     | 1.66 | 1.29 | NM_014680.2    | KIAA0100 (KIAA0100)                                                                             |
| CNNM3        | 1.63 | 1.29 | NM_017623.4    | cyclin M3 (CNNM3)                                                                               |
| LOC100128326 | 1.62 | 1.29 | XR_038006.1    | PREDICTED: misc_RNA (LOC100128326)                                                              |
| SERPINE1     | 1.62 | 1.29 | NM_000602.1    | serpin peptidase inhibitor                                                                      |
| LOC645094    | 1.59 | 1.29 | XR_039085.1    | PREDICTED: misc_RNA (LOC645094)                                                                 |
| HSPC157      | 1.56 | 1.29 | NR_023918.1    | hypothetical LOC29092 (HSPC157)                                                                 |
| LCLAT1       | 1.55 | 1.29 | NM_182551.3    | lysocardiolipin acyltransferase 1 (LCLAT1)                                                      |
| DYRK4        | 1.51 | 1.29 | NM_003845.1    | dual-specificity tyrosine-(Y)-phosphorylation regulated kinase 4 (DYRK4)                        |
| HMOX1        | 1.4  | 1.29 | NM_002133.1    | heme oxygenase (decycling) 1 (HMOX1)                                                            |
| CHPF2        | 1.68 | 1.28 | NM_019015.1    | chondroitin polymerizing factor 2 (CHPF2)                                                       |
| STK17B       | 1.66 | 1.28 | NM_004226.2    | serine/threonine kinase 17b (STK17B)                                                            |
| ARHGAP12     | 1.65 | 1.28 | NM_018287.4    | Rho GTPase activating protein 12 (ARHGAP12)                                                     |
| LOC652481    | 1.65 | 1.28 | XM_941942.1    | PREDICTED: similar to Mitochondrial import inner membrane translocase subunit Tim23 (LOC652481) |
| LARP1B       | 1.59 | 1.28 | NM_018078.2    | La ribonucleoprotein domain family                                                              |
| LRRC45       | 1.59 | 1.28 | NM_144999.2    | leucine rich repeat containing 45 (LRRC45)                                                      |
| ARMC10       | 1.57 | 1.28 | NM_031905.2    | armadillo repeat containing 10 (ARMC10)                                                         |
| C20orf3      | 1.56 | 1.28 | NM_020531.2    | chromosome 20 open reading frame 3 (C20orf3)                                                    |
| PPM1H        | 1.56 | 1.28 | NM_020700.1    | protein phosphatase 1H (PP2C domain containing) (PPM1H)                                         |
| CIC          | 1.55 | 1.28 | NM_015125.3    | capicua homolog (Drosophila) (CIC)                                                              |
| RDH11        | 1.54 | 1.28 | NM_016026.2    | retinol dehydrogenase 11 (all-trans/9-cis/11-cis) (RDH11)                                       |
| MED21        | 1.53 | 1.28 | NM_004264.3    | mediator complex subunit 21 (MED21)                                                             |
| INO80D       | 1.47 | 1.28 | NM_017759.4    | INO80 complex subunit D (INO80D)                                                                |

|                  |      |                     |                                                                     |
|------------------|------|---------------------|---------------------------------------------------------------------|
| <b>GOLT1B</b>    | 1.4  | 1.28 NM_016072.3    | golgi transport 1 homolog B ( <i>S. cerevisiae</i> ) (GOLT1B)       |
| <b>BAG5</b>      | 1.04 | 1.28 NM_004873.2    | BCL2-associated athanogene 5 (BAG5)                                 |
| <b>TTC37</b>     | 1.04 | 1.28 NM_014639.2    | tetratricopeptide repeat domain 37 (TTC37)                          |
| <b>CNN3</b>      | 0.86 | 1.28 NM_001839.2    | calponin 3                                                          |
| <b>TOMM34</b>    | 0.51 | 1.28 NM_006809.4    | translocase of outer mitochondrial membrane 34 (TOMM34)             |
| <b>ZNF416</b>    | 1.69 | 1.27 NM_017879.1    | zinc finger protein 416 (ZNF416)                                    |
| <b>PKMYT1</b>    | 1.68 | 1.27 NM_182687.1    | protein kinase                                                      |
| <b>IGHMBP2</b>   | 1.66 | 1.27 NM_002180.2    | immunoglobulin mu binding protein 2 (IGHMBP2)                       |
| <b>PRR5</b>      | 1.66 | 1.27 NM_001017529.1 | proline rich 5 (renal) (PRR5)                                       |
| <b>TMEM175</b>   | 1.65 | 1.27 NM_032326.2    | transmembrane protein 175 (TMEM175)                                 |
| <b>ACPL2</b>     | 1.57 | 1.27 NM_152282.2    | acid phosphatase-like 2 (ACPL2)                                     |
| <b>BAPX1</b>     | 1.56 | 1.27 NM_001189.2    | bagpipe homeobox homolog 1 ( <i>Drosophila</i> ) (BAPX1)            |
| <b>LOC647691</b> | 1.56 | 1.27 XM_936748.1    | PREDICTED: similar to dicer1 (LOC647691)                            |
| <b>MFSD6</b>     | 1.55 | 1.27 NM_017694.3    | major facilitator superfamily domain containing 6 (MFSD6)           |
| <b>CCNE1</b>     | 1.54 | 1.27 NM_057182.1    | cyclin E1 (CCNE1)                                                   |
| <b>FAM13A</b>    | 1.53 | 1.27 NM_001015045.1 | family with sequence similarity 13                                  |
| <b>SFXN1</b>     | 1.5  | 1.27 NM_022754.4    | sideroflexin 1 (SFXN1)                                              |
| <b>ZNF621</b>    | 1.5  | 1.27 NM_001098414.1 | zinc finger protein 621 (ZNF621)                                    |
| <b>LOC651198</b> | 1.35 | 1.27 XM_001715717.1 | PREDICTED: similar to hCG2036706 (LOC651198)                        |
| <b>IFIT2</b>     | 1.3  | 1.27 NM_001547.4    | interferon-induced protein with tetratricopeptide repeats 2 (IFIT2) |
| <b>CDC2L6</b>    | 1.18 | 1.27 NM_015076.3    | cell division cycle 2-like 6 (CDK8-like) (CDC2L6)                   |
| <b>INSIG1</b>    | 1.08 | 1.27 NM_198336.1    | insulin induced gene 1 (INSIG1)                                     |
| <b>MTPN</b>      | 0.82 | 1.27 NM_145808.2    | myotrophin (MTPN)                                                   |
| <b>RCCD1</b>     | 1.65 | 1.26 NM_001017919.1 | RCC1 domain containing 1 (RCCD1)                                    |
| <b>SCLY</b>      | 1.65 | 1.26 NM_016510.3    | selenocysteine lyase (SCLY)                                         |
| <b>ZNF473</b>    | 1.61 | 1.26 NM_015428.1    | zinc finger protein 473 (ZNF473)                                    |
| <b>FAM119A</b>   | 1.6  | 1.26 NM_001127395.1 | family with sequence similarity 119                                 |
| <b>BIRC6</b>     | 1.57 | 1.26 NM_016252.3    | baculoviral IAP repeat-containing 6 (BIRC6)                         |
| <b>HPS1</b>      | 1.57 | 1.26 NM_182639.1    | Hermansky-Pudlak syndrome 1 (HPS1)                                  |
| <b>ATN1</b>      | 1.51 | 1.26 NM_001007026.1 | atrophin 1 (ATN1)                                                   |
| <b>EPN2</b>      | 1.51 | 1.26 NM_014964.3    | epsin 2 (EPN2)                                                      |
| <b>FAM119A</b>   | 1.51 | 1.26 NM_145280.4    | family with sequence similarity 119                                 |
| <b>SUSD1</b>     | 1.49 | 1.26 NM_022486.3    | sushi domain containing 1 (SUSD1)                                   |
| <b>FNDC3A</b>    | 1.46 | 1.26 NM_001079673.1 | fibronectin type III domain containing 3A (FNDC3A)                  |
| <b>LZTFL1</b>    | 1.46 | 1.26 NM_020347.2    | leucine zipper transcription factor-like 1 (LZTFL1)                 |
| <b>LAMP2</b>     | 1.39 | 1.26 NM_013995.1    | lysosomal-associated membrane protein 2 (LAMP2)                     |
| <b>TMEM183A</b>  | 1.59 | 1.25 NM_138391.4    | transmembrane protein 183A (TMEM183A)                               |
| <b>SLC16A9</b>   | 1.55 | 1.25 NM_194298.1    | solute carrier family 16                                            |
| <b>SASS6</b>     | 1.39 | 1.25 NM_194292.1    | spindle assembly 6 homolog ( <i>C. elegans</i> ) (SASS6)            |
| <b>CCNE2</b>     | 1.33 | 1.25 NM_057735.1    | cyclin E2 (CCNE2)                                                   |
| <b>PELI2</b>     | 1.16 | 1.25 NM_021255.2    | pellino homolog 2 ( <i>Drosophila</i> ) (PELI2)                     |
| <b>FVT1</b>      | 0.89 | 1.25 NM_002035.1    | follicular lymphoma variant translocation 1 (FVT1)                  |
| <b>ARL4D</b>     | 1.55 | 1.24 NM_001661.3    | ADP-ribosylation factor-like 4D (ARL4D)                             |
| <b>LOC442421</b> | 1.51 | 1.24 XM_927249.1    | PREDICTED: similar to prostaglandin E receptor 4                    |
| <b>XKR8</b>      | 1.5  | 1.24 NM_018053.2    | XK                                                                  |
| <b>SLC39A6</b>   | 1.44 | 1.24 NM_012319.3    | solute carrier family 39 (zinc transporter)                         |
| <b>BCAR3</b>     | 1.09 | 1.24 NM_003567.2    | breast cancer anti-estrogen resistance 3 (BCAR3)                    |
| <b>TMEM43</b>    | 1.07 | 1.24 NM_024334.1    | transmembrane protein 43 (TMEM43)                                   |
| <b>ZSCAN2</b>    | 1.62 | 1.23 NM_181877.3    | zinc finger and SCAN domain containing 2 (ZSCAN2)                   |

|                   |      |                     |                                                              |
|-------------------|------|---------------------|--------------------------------------------------------------|
| <b>MMP23A</b>     | 1.53 | 1.23 NM_004659.1    | matrix metalloproteinase 23A (MMP23A)                        |
| <b>C14orf126</b>  | 1.51 | 1.23 NM_080664.2    | chromosome 14 open reading frame 126 (C14orf126)             |
| <b>NCRNA00081</b> | 1.48 | 1.23 NR_024142.1    | non-protein coding RNA 81 (NCRNA00081)                       |
| <b>MFAP5</b>      | 1.31 | 1.23 NM_003480.2    | microfibrillar associated protein 5 (MFAP5)                  |
| <b>DCTN4</b>      | 1.28 | 1.23 NM_016221.2    | dynactin 4 (p62) (DCTN4)                                     |
| <b>TTC33</b>      | 1.24 | 1.23 NM_012382.2    | tetratricopeptide repeat domain 33 (TTC33)                   |
| <b>XPR1</b>       | 1.11 | 1.23 NM_004736.2    | xenotropic and polytropic retrovirus receptor (XPR1)         |
| <b>GNG10</b>      | 0.92 | 1.23 NM_001017998.2 | guanine nucleotide binding protein (G protein)               |
| <b>CMTM3</b>      | 1.43 | 1.22 NM_001048251.1 | CKLF-like MARVEL transmembrane domain containing 3 (CMTM3)   |
| <b>AKAP11</b>     | 1.29 | 1.22 NM_016248.2    | A kinase (PRKA) anchor protein 11 (AKAP11)                   |
| <b>HIF1A</b>      | 1.28 | 1.22 NM_001530.2    | hypoxia-inducible factor 1                                   |
| <b>IKBIP</b>      | 1.28 | 1.22 NM_153687.2    | IKBKB interacting protein (IKBIP)                            |
| <b>PER3</b>       | 1.28 | 1.22 NM_016831.1    | period homolog 3 (Drosophila) (PER3)                         |
| <b>FNDC3A</b>     | 1.24 | 1.22 NM_001079673.1 | fibronectin type III domain containing 3A (FNDC3A)           |
| <b>SPRYD3</b>     | 1.24 | 1.22 NM_032840.1    | SPRY domain containing 3 (SPRYD3)                            |
| <b>AADAT</b>      | 1.2  | 1.22 NM_182662.1    | aminoadipate aminotransferase (AADAT)                        |
| <b>SEMA4B</b>     | 1.19 | 1.22 NM_198925.1    | sema domain                                                  |
| <b>GOLM1</b>      | 1.05 | 1.22 NM_177937.1    | golgi membrane protein 1 (GOLM1)                             |
| <b>PEA15</b>      | 0.82 | 1.22 NM_003768.2    | phosphoprotein enriched in astrocytes 15 (PEA15)             |
| <b>RPN2</b>       | 0.76 | 1.22 NM_002951.2    | ribophorin II (RPN2)                                         |
| <b>RIOK1</b>      | 1.35 | 1.21 NM_031480.2    | RIO kinase 1 (yeast) (RIOK1)                                 |
| <b>KLHL28</b>     | 1.3  | 1.21 NM_017658.3    | kelch-like 28 (Drosophila) (KLHL28)                          |
| <b>ING1</b>       | 1.27 | 1.21 NM_198219.1    | inhibitor of growth family                                   |
| <b>PTGFRN</b>     | 1.26 | 1.21 NM_020440.2    | prostaglandin F2 receptor negative regulator (PTGFRN)        |
| <b>NAV2</b>       | 0.85 | 1.21 NM_145117.3    | neuron navigator 2 (NAV2)                                    |
| <b>SH3BGRL</b>    | 0.51 | 1.21 NM_003022.1    | SH3 domain binding glutamic acid-rich protein like (SH3BGRL) |
| <b>ATP2C1</b>     | 1.37 | 1.2 NM_001001486.1  | ATPase                                                       |
| <b>MAP7D2</b>     | 1.22 | 1.2 NM_152780.2     | MAP7 domain containing 2 (MAP7D2)                            |
| <b>USP37</b>      | 1.13 | 1.2 NM_020935.1     | ubiquitin specific peptidase 37 (USP37)                      |
| <b>HIST1H2BK</b>  | 0.8  | 1.2 NM_080593.1     | histone cluster 1                                            |
| <b>GPR56</b>      | 0.59 | 1.2 NM_201524.1     | G protein-coupled receptor 56 (GPR56)                        |
| <b>ATP1B3</b>     | 0.44 | 1.2 XM_001133534.1  | PREDICTED: ATPase                                            |
| <b>TOM1L1</b>     | 1.34 | 1.19 NM_005486.1    | target of myb1 (chicken)-like 1 (TOM1L1)                     |
| <b>PDCD10</b>     | 1.32 | 1.19 NM_145859.1    | programmed cell death 10 (PDCD10)                            |
| <b>TWISTNB</b>    | 1.26 | 1.19 NM_001002926.1 | TWIST neighbor (TWISTNB)                                     |
| <b>ARSB</b>       | 1.23 | 1.19 NM_000046.2    | arylsulfatase B (ARSB)                                       |
| <b>LOC730167</b>  | 1.23 | 1.19 XM_001726158.1 | PREDICTED: similar to protein tyrosine phosphatase 4a1       |
| <b>PIK3C2B</b>    | 1.22 | 1.19 NM_002646.2    | phosphoinositide-3-kinase                                    |
| <b>PIM2</b>       | 1.22 | 1.19 NM_006875.2    | pim-2 oncogene (PIM2)                                        |
| <b>OASL</b>       | 1.14 | 1.19 NM_198213.1    | 2'-5'-oligoadenylate synthetase-like (OASL)                  |
| <b>SNAPIN</b>     | 0.94 | 1.19 NM_012437.3    | SNAP-associated protein (SNAPIN)                             |
| <b>LOC440595</b>  | 0.69 | 1.19 XR_038356.1    | PREDICTED: misc_RNA (LOC440595)                              |
| <b>TMEM189</b>    | 0.58 | 1.19 NM_199129.1    | transmembrane protein 189 (TMEM189)                          |
| <b>NFE2L2</b>     | 0.45 | 1.19 NM_006164.2    | nuclear factor (erythroid-derived 2)-like 2 (NFE2L2)         |
| <b>PMP22</b>      | 0.24 | 1.19 NM_153321.1    | peripheral myelin protein 22 (PMP22)                         |
| <b>MIR1978</b>    | 0.23 | 1.19 NR_031742.1    | microRNA 1978 (MIR1978)                                      |
| <b>AFTPH</b>      | 1.31 | 1.18 NM_203437.2    | aftphilin (AFTPH)                                            |
| <b>RAB4A</b>      | 1.27 | 1.18 NM_004578.2    | RAB4A                                                        |
| <b>LOC645175</b>  | 1.14 | 1.18 XR_017268.2    | PREDICTED: misc_RNA (LOC645175)                              |



|              |      |                     |                                                                                     |
|--------------|------|---------------------|-------------------------------------------------------------------------------------|
| CNOT8        | 1.13 | 1.18 NM_004779.4    | CCR4-NOT transcription complex                                                      |
| KPNA1        | 0.98 | 1.18 NM_002264.1    | karyopherin alpha 1 (importin alpha 5) (KPNA1)                                      |
| ZNF275       | 0.85 | 1.18 NM_001080485.1 | zinc finger protein 275 (ZNF275)                                                    |
| PLEKHA3      | 1.34 | 1.17 NM_019091.3    | pleckstrin homology domain containing                                               |
| PPFIA1       | 1.23 | 1.17 NM_177423.1    | protein tyrosine phosphatase                                                        |
| TULP4        | 1    | 1.17 NM_001007466.1 | tubby like protein 4 (TULP4)                                                        |
| IMPAD1       | 0.98 | 1.17 NM_017813.2    | inositol monophosphatase domain containing 1 (IMPAD1)                               |
| HNRNPUL2     | 0.95 | 1.17 NM_001079559.1 | heterogeneous nuclear ribonucleoprotein U-like 2 (HNRNPUL2)                         |
| BFAR         | 0.94 | 1.17 NM_016561.1    | bifunctional apoptosis regulator (BFAR)                                             |
| CYB5R4       | 0.88 | 1.17 NM_016230.3    | cytochrome b5 reductase 4 (CYB5R4)                                                  |
| SPPL2A       | 0.76 | 1.17 NM_032802.3    | signal peptide peptidase-like 2A (SPPL2A)                                           |
| LOC644033    | 0.7  | 1.17 XM_927280.1    | PREDICTED: similar to similar to RPL23AP7 protein (LOC644033)                       |
| PSMG1        | 0.5  | 1.17 NM_003720.2    | proteasome (prosome)                                                                |
| TBL1XR1      | 1.19 | 1.16 NM_024665.3    | transducin (beta)-like 1X-linked receptor 1 (TBL1XR1)                               |
| NCBP2        | 1.12 | 1.16 NM_007362.3    | nuclear cap binding protein subunit 2                                               |
| PRNP         | 1.1  | 1.16 NM_183079.2    | prion protein (PRNP)                                                                |
| LOC642197    | 1.05 | 1.16 XM_936354.2    | PREDICTED: similar to Protein FAM82B (LOC642197)                                    |
| KIF1C        | 0.97 | 1.16 NM_006612.4    | kinesin family member 1C (KIF1C)                                                    |
| NTN4         | 0.95 | 1.16 NM_021229.3    | netrin 4 (NTN4)                                                                     |
| GCLM         | 0.57 | 1.16 NM_002061.2    | glutamate-cysteine ligase                                                           |
| ISCA1        | 0.44 | 1.16 NM_030940.3    | iron-sulfur cluster assembly 1 homolog ( <i>S. cerevisiae</i> ) (ISCA1)             |
| NT5C3        | 0.34 | 1.16 NM_001002010.1 | 5'-nucleotidase                                                                     |
| PITPNC1      | 1.1  | 1.15 NM_181671.1    | phosphatidylinositol transfer protein                                               |
| AADACL1      | 1.09 | 1.15 NM_020792.3    | arylacetamide deacetylase-like 1 (AADACL1)                                          |
| C15orf57     | 1.07 | 1.15 NM_001080791.1 | chromosome 15 open reading frame 57 (C15orf57)                                      |
| RAGE         | 1.06 | 1.15 NM_014226.1    | renal tumor antigen (RAGE)                                                          |
| C10orf104    | 1.04 | 1.15 NM_173473.2    | chromosome 10 open reading frame 104 (C10orf104)                                    |
| MED7         | 0.89 | 1.15 NM_001100816.1 | mediator complex subunit 7 (MED7)                                                   |
| RANBP6       | 0.85 | 1.15 NM_012416.2    | RAN binding protein 6 (RANBP6)                                                      |
| COPS2        | 0.83 | 1.15 NM_004236.2    | COP9 constitutive photomorphogenic homolog subunit 2 ( <i>Arabidopsis</i> ) (COPS2) |
| IFT20        | 0.77 | 1.15 NM_174887.2    | intraflagellar transport 20 homolog ( <i>Chlamydomonas</i> ) (IFT20)                |
| NAT13        | 0.71 | 1.15 NM_025146.1    | N-acetyltransferase 13 (GCN5-related) (NAT13)                                       |
| HIST1H2BD    | 0.6  | 1.15 NM_138720.1    | histone cluster 1                                                                   |
| BBX          | 0.59 | 1.15 NM_020235.3    | bobby sox homolog ( <i>Drosophila</i> ) (BBX)                                       |
| TACC1        | 0.51 | 1.15 NM_006283.1    | transforming                                                                        |
| LSM10        | 0.41 | 1.15 NM_032881.1    | LSM10                                                                               |
| ASPM         | 0.32 | 1.15 NM_018136.3    | asp (abnormal spindle) homolog                                                      |
| PRICKLE4     | -0.4 | 1.15 NM_013397.4    | prickle homolog 4 ( <i>Drosophila</i> ) (PRICKLE4)                                  |
| STT3B        | 1.15 | 1.14 NM_178862.1    | STT3                                                                                |
| KLRAQ1       | 1.09 | 1.14 NM_001135629.1 | KLRAQ motif containing 1 (KLRAQ1)                                                   |
| FAM13A       | 1.04 | 1.14 NM_014883.2    | family with sequence similarity 13                                                  |
| NKX3-1       | 1.01 | 1.14 NM_006167.2    | NK3 homeobox 1 (NKX3-1)                                                             |
| LOC100131139 | 0.92 | 1.14 XR_037336.1    | PREDICTED: misc_RNA (LOC100131139)                                                  |
| USP13        | 0.84 | 1.14 NM_003940.1    | ubiquitin specific peptidase 13 (isopeptidase T-3) (USP13)                          |
| CBY1         | 0.76 | 1.14 NM_015373.3    | chibby homolog 1 ( <i>Drosophila</i> ) (CBY1)                                       |
| CCDC16       | 0.59 | 1.14 NM_052857.2    | coiled-coil domain containing 16 (CCDC16)                                           |
| TMEM77       | 1.09 | 1.13 NM_178454.3    | transmembrane protein 77 (TMEM77)                                                   |
| MBD2         | 1.07 | 1.13 NM_003927.3    | methyl-CpG binding domain protein 2 (MBD2)                                          |
| DYRK2        | 0.92 | 1.13 NM_003583.3    | dual-specificity tyrosine-(Y)-phosphorylation regulated kinase 2 (DYRK2)            |

|                     |       |                     |                                                                           |
|---------------------|-------|---------------------|---------------------------------------------------------------------------|
| <b>MFN2</b>         | 0.73  | 1.13 NM_014874.2    | mitofusin 2 (MFN2)                                                        |
| <b>PARP8</b>        | 0.73  | 1.13 NM_024615.2    | PREDICTED: poly (ADP-ribose) polymerase family                            |
| <b>ELOVL5</b>       | 0.64  | 1.13 NM_021814.3    | ELOVL family member 5                                                     |
| <b>PERP</b>         | -0.23 | 1.13 NM_022121.2    | PERP                                                                      |
| <b>NDUFS3</b>       | -0.56 | 1.13 NM_004551.1    | NADH dehydrogenase (ubiquinone) Fe-S protein 3                            |
| <b>C14orf156</b>    | -1.01 | 1.13 NM_031210.3    | chromosome 14 open reading frame 156 (C14orf156)                          |
| <b>AHI1</b>         | 1.04  | 1.12 NM_017651.3    | Abelson helper integration site 1 (AHI1)                                  |
| <b>GNGT1</b>        | 0.92  | 1.12 NM_021955.3    | guanine nucleotide binding protein (G protein)                            |
| <b>CUL5</b>         | 0.91  | 1.12 NM_003478.3    | cullin 5 (CUL5)                                                           |
| <b>EMP1</b>         | 0.77  | 1.12 NM_001423.1    | epithelial membrane protein 1 (EMP1)                                      |
| <b>MTIF2</b>        | 0.74  | 1.12 NM_001005369.1 | mitochondrial translational initiation factor 2 (MTIF2)                   |
| <b>PTGFRN</b>       | 0.74  | 1.12 NM_020440.2    | prostaglandin F2 receptor negative regulator (PTGFRN)                     |
| <b>UBE2D2</b>       | 0.73  | 1.12 NM_003339.2    | ubiquitin-conjugating enzyme E2D 2 (UBC4/5 homolog)                       |
| <b>LOC100132658</b> | 0.19  | 1.12 XR_038800.1    | PREDICTED: misc_RNA (LOC100132658)                                        |
| <b>SUMO1P3</b>      | -0.23 | 1.12 NR_002190.1    | SUMO1 pseudogene 3 (SUMO1P3)                                              |
| <b>LOC158345</b>    | -1.05 | 1.12 XR_017130.1    | PREDICTED: similar to ribosomal protein L4 (LOC158345)                    |
| <b>PPP2R2D</b>      | 1.03  | 1.11 NM_018461.2    | protein phosphatase 2                                                     |
| <b>SLC41A1</b>      | 0.94  | 1.11 NM_173854.4    | solute carrier family 41                                                  |
| <b>CASP7</b>        | 0.91  | 1.11 NM_033339.3    | caspase 7                                                                 |
| <b>IER5</b>         | 0.73  | 1.11 NM_016545.4    | immediate early response 5 (IER5)                                         |
| <b>LOC642333</b>    | 0.72  | 1.11 XR_019071.1    | PREDICTED: similar to M-phase phosphoprotein                              |
| <b>SDHC</b>         | 0.7   | 1.11 NM_001035513.1 | succinate dehydrogenase complex                                           |
| <b>PTPLA</b>        | 0.59  | 1.11 NM_014241.3    | protein tyrosine phosphatase-like (proline instead of catalytic arginine) |
| <b>C10orf58</b>     | 0.53  | 1.11 NM_032333.4    | chromosome 10 open reading frame 58 (C10orf58)                            |
| <b>PSIP1</b>        | 0     | 1.11 NM_033222.2    | PC4 and SFRS1 interacting protein 1 (PSIP1)                               |
| <b>ERRFI1</b>       | -0.1  | 1.11 NM_018948.2    | ERBB receptor feedback inhibitor 1 (ERRFI1)                               |
| <b>CEBPB</b>        | -0.65 | 1.11 NM_005194.2    | CCAAT/enhancer binding protein (C/EBP)                                    |
| <b>STS-1</b>        | 0.92  | 1.1 NM_032873.3     | Cbl-interacting protein Sts-1 (STS-1)                                     |
| <b>HSD17B11</b>     | 0.88  | 1.1 NM_016245.3     | hydroxysteroid (17-beta) dehydrogenase 11 (HSD17B11)                      |
| <b>CKAP2</b>        | 0.84  | 1.1 NM_001098525.1  | cytoskeleton associated protein 2 (CKAP2)                                 |
| <b>CAND1</b>        | 0.83  | 1.1 NM_018448.2     | cullin-associated and neddylation-dissociated 1 (CAND1)                   |
| <b>BBS2</b>         | 0.81  | 1.1 NM_031885.2     | Bardet-Biedl syndrome 2 (BBS2)                                            |
| <b>SEPHS1</b>       | 0.73  | 1.1 NM_012247.3     | selenophosphate synthetase 1 (SEPHS1)                                     |
| <b>MAP1B</b>        | 0.58  | 1.1 NM_032010.1     | microtubule-associated protein 1B (MAP1B)                                 |
| <b>UBE2L3</b>       | 0.48  | 1.1 NM_198157.1     | ubiquitin-conjugating enzyme E2L 3 (UBE2L3)                               |
| <b>MBD4</b>         | 0.33  | 1.1 NM_003925.1     | methyl-CpG binding domain protein 4 (MBD4)                                |
| <b>PSME4</b>        | 0.33  | 1.1 NM_014614.1     | proteasome (prosome)                                                      |
| <b>SCARB2</b>       | 0.29  | 1.1 NM_005506.2     | scavenger receptor class B                                                |
| <b>LOC646527</b>    | 0.18  | 1.1 XR_016632.2     | PREDICTED: misc_RNA (LOC646527)                                           |
| <b>MLLT11</b>       | 0.14  | 1.1 NM_006818.3     | myeloid/lymphoid or mixed-lineage leukemia (trithorax homolog)            |
| <b>ATP6AP2</b>      | 0.11  | 1.1 NM_005765.2     | ATPase                                                                    |
| <b>AK3L1</b>        | 0.04  | 1.1 NM_203464.1     | adenylate kinase 3-like 1 (AK3L1)                                         |
| <b>HMGN4</b>        | 0     | 1.1 NM_006353.2     | high mobility group nucleosomal binding domain 4 (HMGN4)                  |
| <b>LOC641848</b>    | -0.09 | 1.1 XM_935588.1     | PREDICTED: similar to ribosomal protein S3a (LOC641848)                   |
| <b>BIRC5</b>        | 1.01  | 1.09 NM_001012271.1 | baculoviral IAP repeat-containing 5 (BIRC5)                               |
| <b>ERGIC1</b>       | 0.99  | 1.09 NM_020462.1    | endoplasmic reticulum-golgi intermediate compartment (ERGIC) 1 (ERGIC1)   |
| <b>LOC401357</b>    | 0.77  | 1.09 NM_001013685.1 | hypothetical LOC401357 (LOC401357)                                        |
| <b>LOC653631</b>    | 0.75  | 1.09 XM_930476.2    | PREDICTED: hypothetical LOC653631 (LOC653631)                             |
| <b>LOC201725</b>    | 0.57  | 1.09 NM_001008393.1 | hypothetical protein LOC201725 (LOC201725)                                |

|              |       |                     |                                                                     |
|--------------|-------|---------------------|---------------------------------------------------------------------|
| LOC440926    | 0.56  | 1.09 NR_002315.1    | H3 histone                                                          |
| TXNRD1       | 0.52  | 1.09 NM_182743.1    | thioredoxin reductase 1 (TXNRD1)                                    |
| ZAK          | 0.32  | 1.09 NM_133646.2    | sterile alpha motif and leucine zipper containing kinase AZK (ZAK)  |
| IL17RD       | 0.19  | 1.09 NM_001080973.1 | interleukin 17 receptor D (IL17RD)                                  |
| TRIP13       | -0.7  | 1.09 NM_004237.2    | thyroid hormone receptor interactor 13 (TRIP13)                     |
| LOC100134504 | -0.83 | 1.09 XM_001725687.1 | PREDICTED: hypothetical protein LOC100134504 (LOC100134504)         |
| EEF1A1       | -1.62 | 1.09 NM_001402.5    | eukaryotic translation elongation factor 1 alpha 1 (EEF1A1)         |
| C12orf76     | 0.89  | 1.08 NM_207435.1    | chromosome 12 open reading frame 76 (C12orf76)                      |
| GMCL1        | 0.8   | 1.08 NM_178439.3    | germ cell-less homolog 1 (Drosophila) (GMCL1)                       |
| TMEM170A     | 0.78  | 1.08 NM_145254.1    | transmembrane protein 170A (TMEM170A)                               |
| DSTYK        | 0.74  | 1.08 NM_199462.2    | dual serine/threonine and tyrosine protein kinase (DSTYK)           |
| GNPDA2       | 0.71  | 1.08 NM_138335.1    | glucosamine-6-phosphate deaminase 2 (GNPDA2)                        |
| KIF11        | 0.64  | 1.08 NM_004523.2    | kinesin family member 11 (KIF11)                                    |
| LOC221710    | 0.62  | 1.08 XM_927609.1    | PREDICTED: hypothetical protein LOC221710 (LOC221710)               |
| C4orf46      | 0.6   | 1.08 NM_001008393.2 | chromosome 4 open reading frame 46 (C4orf46)                        |
| CDC42        | 0.58  | 1.08 NM_001039802.1 | cell division cycle 42 (GTP binding protein)                        |
| ALG5         | 0.52  | 1.08 NM_013338.3    | asparagine-linked glycosylation 5 homolog (S. cerevisiae)           |
| TMEM209      | 0.35  | 1.08 NM_032842.3    | transmembrane protein 209 (TMEM209)                                 |
| RBBP8        | -0.07 | 1.08 NM_203291.1    | retinoblastoma binding protein 8 (RBBP8)                            |
| AKR1C4       | -0.78 | 1.08 NM_001818.2    | aldo-keto reductase family 1                                        |
| ORC6L        | -1.59 | 1.08 NM_014321.2    | origin recognition complex                                          |
| GPRC5C       | 0.84  | 1.07 NM_018653.3    | G protein-coupled receptor                                          |
| PPFIA1       | 0.84  | 1.07 NM_177423.1    | protein tyrosine phosphatase                                        |
| SNX25        | 0.83  | 1.07 NM_031953.2    | sorting nexin 25 (SNX25)                                            |
| CRLF3        | 0.78  | 1.07 NM_015986.2    | cytokine receptor-like factor 3 (CRLF3)                             |
| ARID3B       | 0.74  | 1.07 NM_006465.2    | AT rich interactive domain 3B (BRIGHT-like) (ARID3B)                |
| ATP2C1       | 0.73  | 1.07 NM_001001485.1 | ATPase                                                              |
| C10orf6      | 0.72  | 1.07 NM_018121.2    | chromosome 10 open reading frame 6 (C10orf6)                        |
| RELA         | 0.72  | 1.07 NM_021975.2    | v-rel reticuloendotheliosis viral oncogene homolog A (avian) (RELA) |
| BTN3A2       | 0.7   | 1.07 NM_007047.3    | butyrophilin                                                        |
| CDKN1C       | 0.63  | 1.07 NM_000076.1    | cyclin-dependent kinase inhibitor 1C (p57)                          |
| KIAA0430     | 0.63  | 1.07 NM_014647.2    | KIAA0430 (KIAA0430)                                                 |
| MN1          | 0.62  | 1.07 NM_002430.2    | meningioma (disrupted in balanced translocation) 1 (MN1)            |
| FAR1         | 0.6   | 1.07 NM_032228.4    | fatty acyl CoA reductase 1 (FAR1)                                   |
| NFIX         | 0.59  | 1.07 NM_002501.2    | nuclear factor I/X (CCAAT-binding transcription factor) (NFIX)      |
| C17orf58     | 0.58  | 1.07 NM_181656.3    | chromosome 17 open reading frame 58 (C17orf58)                      |
| DNAJB14      | 0.56  | 1.07 NM_024920.3    | DnaJ (Hsp40) homolog                                                |
| FRMD6        | 0.52  | 1.07 NM_152330.2    | FERM domain containing 6 (FRMD6)                                    |
| LEPR         | 0.51  | 1.07 NM_001003679.1 | leptin receptor (LEPR)                                              |
| YEATS4       | 0.47  | 1.07 NM_006530.2    | YEATS domain containing 4 (YEATS4)                                  |
| DCUN1D5      | 0.13  | 1.07 NM_032299.2    | DCN1                                                                |
| UBE2F        | -0.08 | 1.07 NM_080678.1    | ubiquitin-conjugating enzyme E2F (putative) (UBE2F)                 |
| NQO1         | -0.92 | 1.07 NM_000903.2    | NAD(P)H dehydrogenase                                               |
| UBB          | -1.2  | 1.07 NM_018955.2    | ubiquitin B (UBB)                                                   |
| LOC392437    | -1.35 | 1.07 XR_037197.1    | PREDICTED: misc_RNA (LOC392437)                                     |
| GNAS         | -1.76 | 1.07 NM_016592.2    | GNAS complex locus (GNAS)                                           |
| SNX5         | 0.77  | 1.06 NM_152227.1    | sorting nexin 5 (SNX5)                                              |
| CYCS         | 0.76  | 1.06 NM_018947.4    | cytochrome c                                                        |
| LIX1L        | 0.76  | 1.06 NM_153713.1    | Lix1 homolog (mouse)-like (LIX1L)                                   |

|                     |       |                     |                                                                                      |
|---------------------|-------|---------------------|--------------------------------------------------------------------------------------|
| <b>C6orf176</b>     | 0.74  | 1.06 XR_017929.2    | PREDICTED: misc_RNA (C6orf176)                                                       |
| <b>ARID4B</b>       | 0.66  | 1.06 NM_016374.5    | AT rich interactive domain 4B (RBP1-like) (ARID4B)                                   |
| <b>TAF1D</b>        | 0.61  | 1.06 NM_024116.2    | TATA box binding protein (TBP)-associated factor                                     |
| <b>ITPRIPL2</b>     | 0.52  | 1.06 NM_001034841.2 | inositol 1                                                                           |
| <b>AGPAT9</b>       | 0.49  | 1.06 NM_032717.3    | 1-acylglycerol-3-phosphate O-acyltransferase 9 (AGPAT9)                              |
| <b>LARP7</b>        | 0.49  | 1.06 NM_015454.1    | La ribonucleoprotein domain family                                                   |
| <b>SLC12A8</b>      | 0.45  | 1.06 NM_024628.4    | solute carrier family 12 (potassium/chloride transporters)                           |
| <b>GPSM2</b>        | 0.36  | 1.06 NM_013296.3    | G-protein signalling modulator 2 (AGS3-like)                                         |
| <b>DNAJB1</b>       | 0.3   | 1.06 NM_006145.1    | DnaJ (Hsp40) homolog                                                                 |
| <b>ITGAV</b>        | 0.21  | 1.06 NM_002210.2    | integrin                                                                             |
| <b>ADO</b>          | 0.01  | 1.06 NM_032804.5    | 2-aminoethanethiol (cysteamine) dioxygenase (ADO)                                    |
| <b>UAP1</b>         | -0.01 | 1.06 NM_003115.3    | UDP-N-acetylglucosamine pyrophosphorylase 1 (UAP1)                                   |
| <b>ATP1B1</b>       | -0.06 | 1.06 NM_001677.3    | ATPase                                                                               |
| <b>DNAJC8</b>       | -0.95 | 1.06 NM_014280.2    | DnaJ (Hsp40) homolog                                                                 |
| <b>C19orf31</b>     | -1.83 | 1.06 NM_001014373.1 | chromosome 19 open reading frame 31 (C19orf31)                                       |
| <b>SEPN1</b>        | 0.77  | 1.05 NM_020451.2    | selenoprotein N                                                                      |
| <b>C1orf149</b>     | 0.75  | 1.05 NM_022756.3    | chromosome 1 open reading frame 149 (C1orf149)                                       |
| <b>ALDH3A2</b>      | 0.74  | 1.05 NM_001031806.1 | aldehyde dehydrogenase 3 family                                                      |
| <b>AKR1B10</b>      | 0.71  | 1.05 NM_020299.3    | aldo-keto reductase family 1                                                         |
| <b>HSPA4L</b>       | 0.7   | 1.05 NM_014278.2    | heat shock 70kDa protein 4-like (HSPA4L)                                             |
| <b>LIN52</b>        | 0.69  | 1.05 NM_001024674.1 | lin-52 homolog (C. elegans) (LIN52)                                                  |
| <b>EPM2AIP1</b>     | 0.67  | 1.05 NM_014805.2    | EPM2A (laforin) interacting protein 1 (EPM2AIP1)                                     |
| <b>FLJ14213</b>     | 0.67  | 1.05 NM_024841.3    | protor-2 (FLJ14213)                                                                  |
| <b>OCRL</b>         | 0.67  | 1.05 NM_001587.3    | oculocerebrorenal syndrome of Lowe (OCRL)                                            |
| <b>TMEM118</b>      | 0.56  | 1.05 NM_032814.2    | transmembrane protein 118 (TMEM118)                                                  |
| <b>MED30</b>        | 0.48  | 1.05 NM_080651.1    | mediator complex subunit 30 (MED30)                                                  |
| <b>AP1S2</b>        | 0.35  | 1.05 NM_003916.3    | adaptor-related protein complex 1                                                    |
| <b>DEPDC1</b>       | 0.33  | 1.05 NM_017779.3    | DEP domain containing 1 (DEPDC1)                                                     |
| <b>DPM2</b>         | 0.29  | 1.05 NM_003863.2    | dolichyl-phosphate mannosyltransferase polypeptide 2                                 |
| <b>EXOSC9</b>       | 0.28  | 1.05 NM_001034194.1 | exosome component 9 (EXOSC9)                                                         |
| <b>NTAN1</b>        | 0.21  | 1.05 NM_173474.2    | N-terminal asparagine amidase (NTAN1)                                                |
| <b>FRG1</b>         | 0     | 1.05 NM_004477.2    | FSHD region gene 1 (FRG1)                                                            |
| <b>C12orf48</b>     | -0.07 | 1.05 NM_017915.2    | chromosome 12 open reading frame 48 (C12orf48)                                       |
| <b>UPP1</b>         | -0.14 | 1.05 NM_003364.2    | uridine phosphorylase 1 (UPP1)                                                       |
| <b>RPL4</b>         | -1.54 | 1.05 NM_000968.2    | ribosomal protein L4 (RPL4)                                                          |
| <b>LOC649150</b>    | -1.59 | 1.05 XR_019269.1    | PREDICTED: similar to eukaryotic translation elongation factor 1 alpha 2 (LOC649150) |
| <b>LOC645715</b>    | -1.79 | 1.05 XR_017484.1    | PREDICTED: misc_RNA (LOC645715)                                                      |
| <b>LOC100132593</b> | -1.91 | 1.05 XM_001719642.1 | PREDICTED: hypothetical protein LOC100132593 (LOC100132593)                          |
| <b>TWF1</b>         | 0.87  | 1.04 NM_002822.3    | twinfilin                                                                            |
| <b>FAM3C</b>        | 0.73  | 1.04 NM_001040020.1 | family with sequence similarity 3                                                    |
| <b>FOSL1</b>        | 0.6   | 1.04 NM_005438.2    | FOS-like antigen 1 (FOSL1)                                                           |
| <b>SNX13</b>        | 0.54  | 1.04 NM_015132.3    | sorting nexin 13 (SNX13)                                                             |
| <b>HSPB8</b>        | 0.42  | 1.04 NM_014365.2    | heat shock 22kDa protein 8 (HSPB8)                                                   |
| <b>GNB5</b>         | 0.35  | 1.04 NM_006578.3    | guanine nucleotide binding protein (G protein)                                       |
| <b>VTI1B</b>        | 0.24  | 1.04 NM_006370.1    | vesicle transport through interaction with t-SNAREs homolog 1B (yeast) (VTI1B)       |
| <b>FUNDC1</b>       | 0.23  | 1.04 NM_173794.2    | FUN14 domain containing 1 (FUNDC1)                                                   |
| <b>BRWD1</b>        | 0.09  | 1.04 NM_001007246.1 | bromodomain and WD repeat domain containing 1 (BRWD1)                                |
| <b>IDH1</b>         | -0.04 | 1.04 NM_005896.2    | isocitrate dehydrogenase 1 (NADP+)                                                   |
| <b>IARS2</b>        | -0.12 | 1.04 NM_018060.3    | isoleucyl-tRNA synthetase 2                                                          |

|                  |       |                     |                                                                                                |
|------------------|-------|---------------------|------------------------------------------------------------------------------------------------|
| <b>MAGT1</b>     | -0.12 | 1.04 NM_032121.4    | magnesium transporter 1 (MAGT1)                                                                |
| <b>MRPS11</b>    | -0.23 | 1.04 NM_176805.1    | mitochondrial ribosomal protein S11 (MRPS11)                                                   |
| <b>ITGB5</b>     | -0.24 | 1.04 NM_002213.3    | PREDICTED: integrin                                                                            |
| <b>LOC642828</b> | -1    | 1.04 XR_016385.2    | PREDICTED: misc_RNA (LOC642828)                                                                |
| <b>LOC730534</b> | -1.12 | 1.04 XR_015150.1    | PREDICTED: similar to D-PCa-2 protein isoform c (LOC730534)                                    |
| <b>SRP14</b>     | -1.64 | 1.04 NM_003134.2    | signal recognition particle 14kDa (homologous Alu RNA binding protein) (SRP14)                 |
| <b>RTKN</b>      | 0.66  | 1.03 NM_033046.2    | rhotekin (RTKN)                                                                                |
| <b>TROVE2</b>    | 0.64  | 1.03 NM_001042370.1 | TROVE domain family                                                                            |
| <b>IFIH1</b>     | 0.61  | 1.03 NM_022168.2    | interferon induced with helicase C domain 1 (IFIH1)                                            |
| <b>GMCL1</b>     | 0.58  | 1.03 NM_178439.3    | germ cell-less homolog 1 (Drosophila) (GMCL1)                                                  |
| <b>ZNF765</b>    | 0.56  | 1.03 NM_001040185.1 | zinc finger protein 765 (ZNF765)                                                               |
| <b>CAPRN1</b>    | 0.54  | 1.03 NM_005898.4    | cell cycle associated protein 1 (CAPRN1)                                                       |
| <b>LGALS8</b>    | 0.53  | 1.03 NM_201545.1    | lectin                                                                                         |
| <b>TRIM26</b>    | 0.49  | 1.03 NM_003449.3    | tripartite motif-containing 26 (TRIM26)                                                        |
| <b>KDEL3</b>     | 0.48  | 1.03 NM_006855.2    | KDEL (Lys-Asp-Glu-Leu) endoplasmic reticulum protein retention receptor 3 (KDEL3)              |
| <b>HERC4</b>     | 0.45  | 1.03 NM_022079.2    | hect domain and RLD 4 (HERC4)                                                                  |
| <b>HIST1H2BD</b> | 0.44  | 1.03 NM_138720.1    | histone cluster 1                                                                              |
| <b>ING2</b>      | 0.43  | 1.03 NM_001564.2    | inhibitor of growth family                                                                     |
| <b>DNAJA4</b>    | 0.4   | 1.03 NM_018602.2    | DnaJ (Hsp40) homolog                                                                           |
| <b>TM9SF3</b>    | 0.4   | 1.03 NM_020123.2    | transmembrane 9 superfamily member 3 (TM9SF3)                                                  |
| <b>TLE4</b>      | 0.39  | 1.03 NM_007005.3    | transducin-like enhancer of split 4 (E(sp1) homolog                                            |
| <b>MTMR9</b>     | 0.33  | 1.03 NM_015458.3    | myotubularin related protein 9 (MTMR9)                                                         |
| <b>NUAK1</b>     | 0.33  | 1.03 NM_014840.2    | NUAK family                                                                                    |
| <b>TTK</b>       | 0.22  | 1.03 NM_003318.3    | TTK protein kinase (TTK)                                                                       |
| <b>BUB3</b>      | 0.21  | 1.03 NM_004725.2    | BUB3 budding uninhibited by benzimidazoles 3 homolog (yeast) (BUB3)                            |
| <b>NT5C3</b>     | 0.2   | 1.03 NM_001002010.1 | 5'-nucleotidase                                                                                |
| <b>PICALM</b>    | 0.16  | 1.03 NM_007166.2    | phosphatidylinositol binding clathrin assembly protein (PICALM)                                |
| <b>PSMA2</b>     | 0.15  | 1.03 NM_002787.3    | proteasome (prosome)                                                                           |
| <b>LOC644131</b> | 0.09  | 1.03 XR_018325.1    | PREDICTED: similar to chaperonin containing TCP1                                               |
| <b>BNIP3L</b>    | 0.08  | 1.03 NM_004331.2    | BCL2/adenovirus E1B 19kDa interacting protein 3-like (BNIP3L)                                  |
| <b>YWHAG</b>     | 0.02  | 1.03 NM_012479.2    | tyrosine 3-monooxygenase/tryptophan 5-monooxygenase activation protein                         |
| <b>GALNT1</b>    | -0.02 | 1.03 NM_020474.2    | UDP-N-acetyl-alpha-D-galactosamine:polypeptide N-acetylgalactosaminyltransferase 1 (GalNAc-T1) |
| <b>NUSAP1</b>    | -0.17 | 1.03 NM_018454.5    | nucleolar and spindle associated protein 1 (NUSAP1)                                            |
| <b>MRPL20</b>    | -0.44 | 1.03 NM_017971.2    | mitochondrial ribosomal protein L20 (MRPL20)                                                   |
| <b>PFN2</b>      | -0.89 | 1.03 NM_053024.2    | profilin 2 (PFN2)                                                                              |
| <b>C9orf80</b>   | -0.93 | 1.03 NM_021218.1    | chromosome 9 open reading frame 80 (C9orf80)                                                   |
| <b>SFRS9</b>     | -1.09 | 1.03 NM_003769.2    | splicing factor                                                                                |
| <b>LOC645387</b> | -1.68 | 1.03 XR_019447.2    | PREDICTED: misc_RNA (LOC645387)                                                                |
| <b>ITIH5</b>     | -1.88 | 1.03 NM_001001851.1 | inter-alpha (globulin) inhibitor H5 (ITIH5)                                                    |
| <b>FAM177A1</b>  | -1.97 | 1.03 NM_173607.3    | family with sequence similarity 177                                                            |
| <b>TSPAN4</b>    | 0.62  | 1.02 NM_001025238.1 | tetraspanin 4 (TSPAN4)                                                                         |
| <b>MAPK1</b>     | 0.58  | 1.02 NM_138957.2    | mitogen-activated protein kinase 1 (MAPK1)                                                     |
| <b>MRPL35</b>    | 0.51  | 1.02 NM_016622.2    | mitochondrial ribosomal protein L35 (MRPL35)                                                   |
| <b>TMEM159</b>   | 0.49  | 1.02 NM_020422.3    | transmembrane protein 159 (TMEM159)                                                            |
| <b>NUP50</b>     | 0.45  | 1.02 NM_007172.3    | nucleoporin 50kDa (NUP50)                                                                      |
| <b>NEK6</b>      | 0.38  | 1.02 NM_014397.3    | NIMA (never in mitosis gene a)-related kinase 6 (NEK6)                                         |
| <b>TFIP11</b>    | 0.33  | 1.02 NM_012143.2    | tuftelin interacting protein 11 (TFIP11)                                                       |
| <b>MLEC</b>      | 0.31  | 1.02 NM_014730.2    | malectin (MLEC)                                                                                |
| <b>RAPGEF1</b>   | 0.1   | 1.02 NM_198679.1    | Rap guanine nucleotide exchange factor (GEF) 1 (RAPGEF1)                                       |

|              |       |                     |                                                                                                |
|--------------|-------|---------------------|------------------------------------------------------------------------------------------------|
| ITGB3BP      | 0.01  | 1.02 NM_014288.3    | integrin beta 3 binding protein (beta3-endonexin) (ITGB3BP)                                    |
| ARMCX2       | -0.01 | 1.02 NM_177949.1    | armadillo repeat containing                                                                    |
| IRX3         | -0.1  | 1.02 NM_024336.1    | iroquois homeobox 3 (IRX3)                                                                     |
| LOC100133185 | -0.36 | 1.02 XR_039407.1    | PREDICTED: misc_RNA (LOC100133185)                                                             |
| KTN1         | -0.45 | 1.02 NM_004986.2    | kinectin 1 (kinesin receptor) (KTN1)                                                           |
| LOC100128288 | -0.45 | 1.02 NR_024447.1    | hypothetical protein LOC100128288 (LOC100128288)                                               |
| COX17        | -0.86 | 1.02 NM_005694.1    | COX17 cytochrome c oxidase assembly homolog (S. cerevisiae) (COX17)                            |
| ZNF549       | -0.9  | 1.02 NM_153263.1    | zinc finger protein 549 (ZNF549)                                                               |
| LOC100130892 | -1.03 | 1.02 XM_001720172.1 | PREDICTED: hypothetical protein LOC100130892 (LOC100130892)                                    |
| BTF3         | -1.62 | 1.02 NM_001037637.1 | basic transcription factor 3 (BTF3)                                                            |
| LOC728590    | -1.63 | 1.02 XM_001131826.2 | PREDICTED: similar to rCG23287 (LOC728590)                                                     |
| AKR1C3       | -1.68 | 1.02 NM_003739.4    | aldo-keto reductase family 1                                                                   |
| LOC729324    | -1.74 | 1.02 XR_041500.1    | PREDICTED: misc_RNA (LOC729324)                                                                |
| LOC100128410 | -1.82 | 1.02 XR_037117.1    | PREDICTED: misc_RNA (LOC100128410)                                                             |
| AKR1C2       | -1.84 | 1.02 NM_001354.4    | aldo-keto reductase family 1                                                                   |
| LOC100133465 | -2    | 1.02 XR_037361.1    | PREDICTED: misc_RNA (LOC100133465)                                                             |
| IMAA         | -2.23 | 1.02 NR_002594.1    | SLC7A5 pseudogene (IMAA)                                                                       |
| MAT2B        | 0.71  | 1.01 NM_013283.3    | methionine adenosyltransferase II                                                              |
| ZFP64        | 0.57  | 1.01 NM_199427.1    | zinc finger protein 64 homolog (mouse) (ZFP64)                                                 |
| VAMP4        | 0.55  | 1.01 NM_003762.3    | vesicle-associated membrane protein 4 (VAMP4)                                                  |
| KATNA1       | 0.48  | 1.01 NM_007044.2    | katanin p60 (ATPase-containing) subunit A 1 (KATNA1)                                           |
| WWP2         | 0.47  | 1.01 NM_199423.1    | WW domain containing E3 ubiquitin protein ligase 2 (WWP2)                                      |
| ARIH1        | 0.41  | 1.01 NM_005744.2    | ariadne homolog                                                                                |
| AGPAT2       | 0.36  | 1.01 NM_006412.3    | 1-acylglycerol-3-phosphate O-acyltransferase 2 (lysophosphatidic acid acyltransferase          |
| OLR1         | 0.26  | 1.01 NM_002543.3    | oxidized low density lipoprotein (lectin-like) receptor 1 (OLR1)                               |
| AEN          | 0.25  | 1.01 NM_022767.3    | apoptosis enhancing nuclease (AEN)                                                             |
| KIF5B        | 0.2   | 1.01 NM_004521.1    | kinesin family member 5B (KIF5B)                                                               |
| PNN          | 0.18  | 1.01 NM_002687.3    | pinin                                                                                          |
| CD55         | 0.16  | 1.01 NM_000574.2    | CD55 molecule                                                                                  |
| TSEN2        | 0.15  | 1.01 NM_025265.2    | tRNA splicing endonuclease 2 homolog (S. cerevisiae) (TSEN2)                                   |
| LMOD3        | 0.08  | 1.01 NM_198271.2    | leiomodin 3 (fetal) (LMOD3)                                                                    |
| KIAA0020     | 0.07  | 1.01 NM_014878.4    | KIAA0020 (KIAA0020)                                                                            |
| PPARBP       | 0.07  | 1.01 NM_004774.2    | PPAR binding protein (PPARBP)                                                                  |
| GAPVD1       | 0.05  | 1.01 NM_015635.2    | GTPase activating protein and VPS9 domains 1 (GAPVD1)                                          |
| LOC387882    | -0.05 | 1.01 NM_207376.1    | hypothetical protein (LOC387882)                                                               |
| CLCC1        | -0.06 | 1.01 NM_015127.3    | chloride channel CLIC-like 1 (CLCC1)                                                           |
| LOC647150    | -0.26 | 1.01 XR_017449.2    | PREDICTED: misc_RNA (LOC647150)                                                                |
| TMEM17       | -0.55 | 1.01 NM_198276.1    | transmembrane protein 17 (TMEM17)                                                              |
| LOC388076    | -1.04 | 1.01 XM_001722259.1 | PREDICTED: hypothetical LOC388076 (LOC388076)                                                  |
| LOC731542    | -1.57 | 1.01 XR_015517.2    | PREDICTED: misc_RNA (LOC731542)                                                                |
| LOC645387    | -1.72 | 1.01 XR_016424.2    | PREDICTED: misc_RNA (LOC645387)                                                                |
| LOC644039    | -2.05 | 1.01 XM_929431.1    | PREDICTED: similar to 60S ribosomal protein L10 (QM protein) (Tumor suppressor QM) (LOC644039) |
| RAB7L1       | 0.54  | 1 NM_003929.1       | RAB7                                                                                           |
| UGT8         | 0.4   | 1 NM_003360.2       | UDP glycosyltransferase 8 (UDP-galactose ceramide galactosyltransferase) (UGT8)                |
| SPOCD1       | 0.38  | 1 NM_144569.4       | SPOC domain containing 1 (SPOCD1)                                                              |
| CCDC53       | -0.03 | 1 NM_016053.2       | coiled-coil domain containing 53 (CCDC53)                                                      |
| CNIH4        | -0.63 | 1 NM_014184.2       | cornichon homolog 4 (Drosophila) (CNIH4)                                                       |
| LOC649946    | -1.59 | 1 NR_003040.1       | PREDICTED: similar to 60S ribosomal protein L23a (LOC649946)                                   |
| RPS6P1       | -1.92 | 1 XR_039076.1       | PREDICTED: misc_RNA (RPS6P1)                                                                   |

|                     |       |       |                |                                                                 |
|---------------------|-------|-------|----------------|-----------------------------------------------------------------|
| <b>NOV</b>          | 0.35  | -1    | NM_002514.2    | nephroblastoma overexpressed gene (NOV)                         |
| <b>OKL38</b>        | 0.28  | -1    | NM_013370.2    | pregnancy-induced growth inhibitor (OKL38)                      |
| <b>RNF121</b>       | 0.24  | -1    | NM_018320.3    | ring finger protein 121 (RNF121)                                |
| <b>SCCPDH</b>       | 0.21  | -1    | NM_016002.2    | saccharopine dehydrogenase (putative) (SCCPDH)                  |
| <b>DLGAP5</b>       | -0.07 | -1    | NM_014750.3    | discs                                                           |
| <b>SEPX1</b>        | -0.23 | -1    | NM_016332.2    | selenoprotein X                                                 |
| <b>HMGB1L1</b>      | -0.34 | -1    | NM_001008735.1 | high-mobility group box 1-like 1 (HMGB1L1)                      |
| <b>SPTLC1</b>       | -0.96 | -1    | NM_178324.1    | serine palmitoyltransferase                                     |
| <b>SNRPG</b>        | -1.57 | -1    | NM_003096.2    | small nuclear ribonucleoprotein polypeptide G (SNRPG)           |
| <b>H2AFY</b>        | -1.61 | -1    | NM_004893.2    | H2A histone family                                              |
| <b>HNRPA2B1</b>     | -1.66 | -1    | NM_031243.1    | heterogeneous nuclear ribonucleoprotein A2/B1 (HNRPA2B1)        |
| <b>RAN</b>          | -1.76 | -1    | NM_006325.3    | RAN                                                             |
| <b>NACA</b>         | -1.79 | -1    | NM_005594.2    | nascent-polypeptide-associated complex alpha polypeptide (NACA) |
| <b>EIF2C3</b>       | 0.51  | -1.01 | NM_177422.1    | eukaryotic translation initiation factor 2C                     |
| <b>HIF1A</b>        | 0.43  | -1.01 | NM_001530.2    | hypoxia-inducible factor 1                                      |
| <b>TAF5</b>         | 0.41  | -1.01 | NM_006951.3    | TAF5 RNA polymerase II                                          |
| <b>GPC6</b>         | 0.36  | -1.01 | NM_005708.2    | glypican 6 (GPC6)                                               |
| <b>USP33</b>        | 0.36  | -1.01 | NM_015017.3    | ubiquitin specific peptidase 33 (USP33)                         |
| <b>LIPA</b>         | 0.31  | -1.01 | NM_000235.2    | lipase A                                                        |
| <b>LOC400061</b>    | 0.09  | -1.01 | XR_039516.1    | PREDICTED: misc_RNA (LOC400061)                                 |
| <b>LOC645231</b>    | 0.07  | -1.01 | XR_040322.1    | PREDICTED: misc_RNA (LOC645231)                                 |
| <b>USP48</b>        | 0.07  | -1.01 | NM_001032730.1 | ubiquitin specific peptidase 48 (USP48)                         |
| <b>RAB3GAP1</b>     | 0.05  | -1.01 | NM_012233.1    | RAB3 GTPase activating protein subunit 1 (catalytic) (RAB3GAP1) |
| <b>RSRC2</b>        | 0.04  | -1.01 | NM_023012.4    | arginine/serine-rich coiled-coil 2 (RSRC2)                      |
| <b>TUFT1</b>        | 0     | -1.01 | NM_020127.1    | tuftelin 1 (TUFT1)                                              |
| <b>PRCP</b>         | -0.04 | -1.01 | NM_005040.2    | prolylcarboxypeptidase (angiotensinase C) (PRCP)                |
| <b>GGH</b>          | -0.06 | -1.01 | NM_003878.1    | gamma-glutamyl hydrolase (conjugase)                            |
| <b>MYH10</b>        | -0.07 | -1.01 | NM_005964.1    | myosin                                                          |
| <b>AP1S2</b>        | -0.12 | -1.01 | NM_003916.3    | adaptor-related protein complex 1                               |
| <b>HSD17B12</b>     | -0.32 | -1.01 | NM_016142.1    | hydroxysteroid (17-beta) dehydrogenase 12 (HSD17B12)            |
| <b>MRPL34</b>       | -0.65 | -1.01 | NM_023937.2    | mitochondrial ribosomal protein L34 (MRPL34)                    |
| <b>NLRP8</b>        | -0.72 | -1.01 | NM_176811.2    | NLR family                                                      |
| <b>CKS1B</b>        | -1.28 | -1.01 | NM_001826.1    | CDC28 protein kinase regulatory subunit 1B (CKS1B)              |
| <b>PSMB1</b>        | -1.5  | -1.01 | NM_002793.2    | proteasome (prosome)                                            |
| <b>ANXA2</b>        | -1.87 | -1.01 | NM_001002858.1 | annexin A2 (ANXA2)                                              |
| <b>NME1</b>         | -1.87 | -1.01 | NM_000269.2    | non-metastatic cells 1                                          |
| <b>LOC653314</b>    | -2.11 | -1.01 | NM_001080544.2 | similar to ribosomal protein L19 (LOC653314)                    |
| <b>HERC3</b>        | 0.4   | -1.02 | NM_014606.1    | hect domain and RLD 3 (HERC3)                                   |
| <b>SNORA6</b>       | 0.39  | -1.02 | NR_002325.1    | small nucleolar RNA                                             |
| <b>WASH1</b>        | 0.38  | -1.02 | NM_182905.3    | WAS protein family homolog 1 (WASH1)                            |
| <b>BRI3BP</b>       | 0.36  | -1.02 | NM_080626.5    | PREDICTED: BRI3 binding protein (BRI3BP)                        |
| <b>SEC23A</b>       | 0.34  | -1.02 | NM_006364.2    | Sec23 homolog A (S. cerevisiae) (SEC23A)                        |
| <b>FBXO30</b>       | 0.32  | -1.02 | NM_032145.4    | F-box protein 30 (FBXO30)                                       |
| <b>LOC100133600</b> | 0.27  | -1.02 | XM_001713611.1 | PREDICTED: hypothetical protein LOC100133600 (LOC100133600)     |
| <b>PCYOX1</b>       | 0.27  | -1.02 | NM_016297.2    | prenylcysteine oxidase 1 (PCYOX1)                               |
| <b>TMEM45A</b>      | 0.26  | -1.02 | NM_018004.1    | transmembrane protein 45A (TMEM45A)                             |
| <b>WNT7B</b>        | 0.08  | -1.02 | NM_058238.1    | wingless-type MMTV integration site family                      |
| <b>KIF11</b>        | 0.04  | -1.02 | NM_004523.2    | kinesin family member 11 (KIF11)                                |
| <b>SNHG7</b>        | 0.02  | -1.02 | NR_024542.1    | small nucleolar RNA host gene 7 (non-protein coding) (SNHG7)    |

|              |       |       |                |                                                                                           |
|--------------|-------|-------|----------------|-------------------------------------------------------------------------------------------|
| PRRC1        | -0.02 | -1.02 | NM_130809.2    | proline-rich coiled-coil 1 (PRRC1)                                                        |
| MLEC         | -0.27 | -1.02 | NM_014730.2    | malectin (MLEC)                                                                           |
| MRPS2        | -0.33 | -1.02 | NM_016034.2    | mitochondrial ribosomal protein S2 (MRPS2)                                                |
| LOC387791    | -0.35 | -1.02 | XR_037721.1    | PREDICTED: misc_RNA (LOC387791)                                                           |
| RPS7         | -0.39 | -1.02 | NM_001011.3    | ribosomal protein S7 (RPS7)                                                               |
| PRCP         | -0.56 | -1.02 | NM_199418.2    | prolylcarboxypeptidase (angiotensinase C) (PRCP)                                          |
| EIF4H        | -1.01 | -1.02 | NM_022170.1    | eukaryotic translation initiation factor 4H (EIF4H)                                       |
| DNCL1        | -1.58 | -1.02 | NM_003746.1    | dynein                                                                                    |
| CSDA         | -1.63 | -1.02 | NM_003651.3    | cold shock domain protein A (CSDA)                                                        |
| LDHB         | -1.69 | -1.02 | NM_002300.4    | lactate dehydrogenase B (LDHB)                                                            |
| FAM115A      | -1.7  | -1.02 | NM_014719.1    | family with sequence similarity 115                                                       |
| LOC643509    | -1.84 | -1.02 | XM_928156.1    | PREDICTED: similar to Dihydrofolate reductase                                             |
| LOC641814    | -1.88 | -1.02 | XM_935998.3    | PREDICTED: similar to Ribosomal protein L6                                                |
| CCR6         | -2.06 | -1.02 | NM_031409.2    | chemokine (C-C motif) receptor 6 (CCR6)                                                   |
| CLUAP1       | -2.5  | -1.02 | NM_024793.1    | clusterin associated protein 1 (CLUAP1)                                                   |
| VHL          | 0.5   | -1.03 | NM_000551.2    | von Hippel-Lindau tumor suppressor (VHL)                                                  |
| WASPIP       | 0.42  | -1.03 | NM_003387.3    | Wiskott-Aldrich syndrome protein interacting protein (WASPIP)                             |
| LOC731007    | 0.37  | -1.03 | XM_001132080.1 | PREDICTED: similar to Adenylate kinase isoenzyme 4                                        |
| LOC729898    | 0.36  | -1.03 | XM_001134101.1 | PREDICTED: similar to zinc finger and BTB domain containing 8 opposite strand (LOC729898) |
| SRFBP1       | 0.36  | -1.03 | NM_152546.1    | serum response factor binding protein 1 (SRFBP1)                                          |
| TRIM24       | 0.36  | -1.03 | NM_015905.2    | tripartite motif-containing 24 (TRIM24)                                                   |
| NR2C2        | 0.33  | -1.03 | NM_003298.3    | nuclear receptor subfamily 2                                                              |
| PSMC3IP      | 0.26  | -1.03 | NM_016556.1    | PSMC3 interacting protein (PSMC3IP)                                                       |
| LOC100127922 | 0.18  | -1.03 | XR_038410.1    | PREDICTED: misc_RNA (LOC100127922)                                                        |
| GGH          | 0.12  | -1.03 | NM_003878.1    | gamma-glutamyl hydrolase (conjugase)                                                      |
| MNAT1        | 0.07  | -1.03 | NM_002431.2    | menage a trois homolog 1                                                                  |
| RAB5A        | 0     | -1.03 | NM_004162.3    | RAB5A                                                                                     |
| STAG1        | -0.05 | -1.03 | NM_005862.2    | stromal antigen 1 (STAG1)                                                                 |
| FKBP4        | -0.11 | -1.03 | NM_002014.2    | FK506 binding protein 4                                                                   |
| PMEPA1       | -0.15 | -1.03 | NM_199169.1    | prostate transmembrane protein                                                            |
| UPF3B        | -0.31 | -1.03 | NM_023010.2    | UPF3 regulator of nonsense transcripts homolog B (yeast) (UPF3B)                          |
| CCL2         | -0.38 | -1.03 | NM_002982.3    | chemokine (C-C motif) ligand 2 (CCL2)                                                     |
| SEC31A       | -0.39 | -1.03 | NM_014933.2    | SEC31 homolog A (S. cerevisiae) (SEC31A)                                                  |
| C5orf28      | -0.71 | -1.03 | NM_022483.3    | chromosome 5 open reading frame 28 (C5orf28)                                              |
| CKS2         | -1.33 | -1.03 | NM_001827.1    | CDC28 protein kinase regulatory subunit 2 (CKS2)                                          |
| NDUFA8       | -1.34 | -1.03 | NM_014222.2    | NADH dehydrogenase (ubiquinone) 1 alpha subcomplex                                        |
| LOC650152    | -1.5  | -1.03 | XR_018707.1    | PREDICTED: similar to tropomyosin 3 isoform 2 (LOC650152)                                 |
| MDH2         | -1.54 | -1.03 | NM_005918.2    | malate dehydrogenase 2                                                                    |
| SLC25A3      | -1.54 | -1.03 | NM_002635.2    | solute carrier family 25 (mitochondrial carrier; phosphate carrier)                       |
| LOC728620    | -1.64 | -1.03 | XR_037241.1    | PREDICTED: misc_RNA (LOC728620)                                                           |
| LOC100129028 | -2.03 | -1.03 | XM_001722134.1 | PREDICTED: similar to 60S acidic ribosomal protein P1 (LOC100129028)                      |
| RPL19        | -2.22 | -1.03 | NM_000981.3    | ribosomal protein L19 (RPL19)                                                             |
| F2R          | -2.35 | -1.03 | NM_001992.2    | coagulation factor II (thrombin) receptor (F2R)                                           |
| LOC100129758 | -2.41 | -1.03 | XR_039411.1    | PREDICTED: misc_RNA (LOC100129758)                                                        |
| CBL          | 0.34  | -1.04 | NM_005188.2    | Cas-Br-M (murine) ecotropic retroviral transforming sequence (CBL)                        |
| PRR11        | 0.3   | -1.04 | NM_018304.2    | proline rich 11 (PRR11)                                                                   |
| EZH2         | 0.29  | -1.04 | NM_004456.3    | enhancer of zeste homolog 2 (Drosophila) (EZH2)                                           |
| USP48        | 0.28  | -1.04 | NM_032236.5    | ubiquitin specific peptidase 48 (USP48)                                                   |
| HP1BP3       | 0.27  | -1.04 | NM_016287.3    | heterochromatin protein 1                                                                 |



|                     |       |                      |                                                                                       |
|---------------------|-------|----------------------|---------------------------------------------------------------------------------------|
| <b>LOC100127913</b> | 0.26  | -1.04 XM_001715054.1 | PREDICTED: hypothetical LOC100127913 (LOC100127913)                                   |
| <b>TCEA1</b>        | 0.26  | -1.04 NM_006756.2    | transcription elongation factor A (SII)                                               |
| <b>TMEM45A</b>      | 0.25  | -1.04 NM_018004.1    | transmembrane protein 45A (TMEM45A)                                                   |
| <b>TRIM66</b>       | 0.25  | -1.04 NM_014818.1    | tripartite motif-containing 66 (TRIM66)                                               |
| <b>PSPC1</b>        | 0.24  | -1.04 NR_003272.1    | paraspeckle component 1 (PSPC1)                                                       |
| <b>ZNF423</b>       | 0.2   | -1.04 NM_015069.2    | zinc finger protein 423 (ZNF423)                                                      |
| <b>IFT52</b>        | 0.15  | -1.04 NM_016004.2    | intraflagellar transport 52 homolog (Chlamydomonas) (IFT52)                           |
| <b>YME1L1</b>       | 0.13  | -1.04 NM_139312.1    | YME1-like 1 (S. cerevisiae) (YME1L1)                                                  |
| <b>TTC19</b>        | 0.05  | -1.04 NM_017775.2    | tetratricopeptide repeat domain 19 (TTC19)                                            |
| <b>NRAS</b>         | 0.03  | -1.04 NM_002524.2    | neuroblastoma RAS viral (v-ras) oncogene homolog (NRAS)                               |
| <b>GRB2</b>         | -0.01 | -1.04 NM_002086.3    | growth factor receptor-bound protein 2 (GRB2)                                         |
| <b>MCEE</b>         | -0.02 | -1.04 NM_032601.2    | methylmalonyl CoA epimerase (MCEE)                                                    |
| <b>WTAP</b>         | -0.02 | -1.04 NM_152858.1    | Wilms tumor 1 associated protein (WTAP)                                               |
| <b>P4HA1</b>        | -0.07 | -1.04 NM_000917.2    | procollagen-proline                                                                   |
| <b>SRI</b>          | -0.13 | -1.04 NM_003130.2    | sorcin (SRI)                                                                          |
| <b>NUP153</b>       | -0.16 | -1.04 NM_005124.2    | nucleoporin 153kDa (NUP153)                                                           |
| <b>IDS</b>          | -0.18 | -1.04 NM_006123.2    | iduronate 2-sulfatase (Hunter syndrome) (IDS)                                         |
| <b>FYTTD1</b>       | -0.22 | -1.04 NM_001011537.1 | forty-two-three domain containing 1 (FYTTD1)                                          |
| <b>CAST</b>         | -0.28 | -1.04 NM_001042445.1 | calpastatin (CAST)                                                                    |
| <b>KPNA2</b>        | -0.32 | -1.04 NM_002266.2    | karyopherin alpha 2 (RAG cohort 1)                                                    |
| <b>NCAPG</b>        | -0.4  | -1.04 NM_022346.3    | non-SMC condensin I complex                                                           |
| <b>MGC3731</b>      | -0.41 | -1.04 NM_024313.1    | hypothetical protein MGC3731 (MGC3731)                                                |
| <b>EIF2AK2</b>      | -0.44 | -1.04 NM_002759.1    | eukaryotic translation initiation factor 2-alpha kinase 2 (EIF2AK2)                   |
| <b>TOMM40</b>       | -0.65 | -1.04 NM_006114.1    | translocase of outer mitochondrial membrane 40 homolog (yeast) (TOMM40)               |
| <b>C6orf153</b>     | -0.68 | -1.04 NM_033112.2    | chromosome 6 open reading frame 153 (C6orf153)                                        |
| <b>KRT10</b>        | -0.88 | -1.04 NM_000421.2    | keratin 10 (epidermolytic hyperkeratosis; keratosis palmaris et plantaris) (KRT10)    |
| <b>PSME1</b>        | -0.88 | -1.04 NM_006263.2    | proteasome (prosome)                                                                  |
| <b>LOC728553</b>    | -1.61 | -1.04 XR_041708.1    | PREDICTED: misc_RNA (LOC728553)                                                       |
| <b>LOC388707</b>    | -1.63 | -1.04 XR_017679.2    | PREDICTED: misc_RNA (LOC388707)                                                       |
| <b>FKTN</b>         | -1.68 | -1.04 NM_006731.2    | fukutin (FKTN)                                                                        |
| <b>S100A10</b>      | -1.68 | -1.04 NM_002966.1    | S100 calcium binding protein A10 (annexin II ligand)                                  |
| <b>ATP5A1</b>       | -1.7  | -1.04 NM_004046.4    | ATP synthase                                                                          |
| <b>ISG15</b>        | -1.71 | -1.04 NM_005101.1    | ISG15 ubiquitin-like modifier (ISG15)                                                 |
| <b>TRMT112</b>      | -1.72 | -1.04 NM_016404.1    | tRNA methyltransferase 11-2 homolog (S. cerevisiae) (TRMT112)                         |
| <b>IL18</b>         | -1.76 | -1.04 NM_001562.2    | interleukin 18 (interferon-gamma-inducing factor) (IL18)                              |
| <b>LOC651202</b>    | -1.89 | -1.04 XM_940333.2    | PREDICTED: similar to large subunit ribosomal protein L36a (LOC651202)                |
| <b>LOC645317</b>    | -1.96 | -1.04 XM_934920.2    | PREDICTED: similar to Coiled-coil-helix-coiled-coil-helix domain-containing protein 2 |
| <b>NACA</b>         | -2.09 | -1.04 NM_005594.2    | nascent-polypeptide-associated complex alpha polypeptide (NACA)                       |
| <b>LOC284393</b>    | -2.39 | -1.04 XM_001726716.1 | PREDICTED: similar to QM protein                                                      |
| <b>LOC439953</b>    | -2.39 | -1.04 XR_017375.2    | PREDICTED: misc_RNA (LOC439953)                                                       |
| <b>LOC728368</b>    | -2.48 | -1.04 XR_015295.2    | PREDICTED: misc_RNA (LOC728368)                                                       |
| <b>PHF20L1</b>      | 0.38  | -1.05 NM_198513.1    | PHD finger protein 20-like 1 (PHF20L1)                                                |
| <b>FAM177A1</b>     | 0.34  | -1.05 NM_173607.3    | family with sequence similarity 177                                                   |
| <b>ATPBD4</b>       | 0.23  | -1.05 NM_080650.2    | ATP binding domain 4 (ATPBD4)                                                         |
| <b>CHRNA5</b>       | 0.23  | -1.05 NM_000745.2    | cholinergic receptor                                                                  |
| <b>BPGM</b>         | 0.22  | -1.05 NM_001724.3    |                                                                                       |
| <b>MAMDC2</b>       | 0.21  | -1.05 NM_153267.3    | MAM domain containing 2 (MAMDC2)                                                      |
| <b>KITLG</b>        | 0.18  | -1.05 NM_000899.3    | KIT ligand (KITLG)                                                                    |
| <b>PPIG</b>         | 0.16  | -1.05 NM_004792.2    | peptidylprolyl isomerase G (cyclophilin G) (PPIG)                                     |

|                     |       |                      |                                                                                           |
|---------------------|-------|----------------------|-------------------------------------------------------------------------------------------|
| <b>LGALS9B</b>      | 0.12  | -1.05 NM_001042685.1 | lectin                                                                                    |
| <b>NARS2</b>        | 0.09  | -1.05 NM_024678.3    | asparaginyl-tRNA synthetase 2                                                             |
| <b>TCEAL8</b>       | 0.05  | -1.05 NM_153333.2    | transcription elongation factor A (SII)-like 8 (TCEAL8)                                   |
| <b>LOC650321</b>    | 0.02  | -1.05 XM_939410.1    | PREDICTED: similar to zinc finger and BTB domain containing 8 opposite strand (LOC650321) |
| <b>NUMB</b>         | 0     | -1.05 NM_001005744.1 | numb homolog (Drosophila) (NUMB)                                                          |
| <b>AVEN</b>         | -0.03 | -1.05 NM_020371.2    | apoptosis                                                                                 |
| <b>CLK1</b>         | -0.03 | -1.05 NM_001024646.1 | CDC-like kinase 1 (CLK1)                                                                  |
| <b>LOC647389</b>    | -0.04 | -1.05 XM_936461.1    | PREDICTED: hypothetical protein LOC647389 (LOC647389)                                     |
| <b>PIGT</b>         | -0.05 | -1.05 NM_015937.3    | phosphatidylinositol glycan anchor biosynthesis                                           |
| <b>SNAPC5</b>       | -0.13 | -1.05 NM_006049.2    | small nuclear RNA activating complex                                                      |
| <b>ACOT9</b>        | -0.17 | -1.05 NM_001033583.2 | acyl-CoA thioesterase 9 (ACOT9)                                                           |
| <b>RGS2</b>         | -0.21 | -1.05 NM_002923.1    | regulator of G-protein signalling 2                                                       |
| <b>ITPRIP</b>       | -0.23 | -1.05 NM_033397.2    | inositol 1                                                                                |
| <b>HNRNPA2B1</b>    | -0.34 | -1.05 NM_031243.2    | heterogeneous nuclear ribonucleoprotein A2/B1 (HNRNPA2B1)                                 |
| <b>HES4</b>         | -0.69 | -1.05 NM_021170.2    | hairy and enhancer of split 4 (Drosophila) (HES4)                                         |
| <b>HNRNPD</b>       | -1.55 | -1.05 NM_031369.2    | heterogeneous nuclear ribonucleoprotein D (AU-rich element RNA binding protein 1)         |
| <b>LSM3</b>         | -1.6  | -1.05 NM_014463.1    | LSM3 homolog                                                                              |
| <b>MGC26356</b>     | -1.61 | -1.05 XR_041102.1    | PREDICTED: misc_RNA (MGC26356)                                                            |
| <b>RPL9</b>         | -1.67 | -1.05 NM_001024921.2 | ribosomal protein L9 (RPL9)                                                               |
| <b>LOC440043</b>    | -1.72 | -1.05 XR_015812.2    | PREDICTED: misc_RNA (LOC440043)                                                           |
| <b>PDCD6</b>        | -1.75 | -1.05 NM_013232.3    | programmed cell death 6 (PDCD6)                                                           |
| <b>LOC100128505</b> | -1.85 | -1.05 XM_001723239.1 | PREDICTED: similar to hCG2021201 (LOC100128505)                                           |
| <b>LOC645895</b>    | -2.15 | -1.05 XM_928866.1    | PREDICTED: hypothetical protein LOC645895 (LOC645895)                                     |
| <b>RPS4X</b>        | -2.23 | -1.05 NM_001007.3    | ribosomal protein S4                                                                      |
| <b>JAK1</b>         | 0.33  | -1.06 NM_002227.2    | Janus kinase 1 (JAK1)                                                                     |
| <b>DIAPH3</b>       | 0.26  | -1.06 NM_030932.3    | diaphanous homolog 3 (Drosophila) (DIAPH3)                                                |
| <b>SFRS13A</b>      | 0.14  | -1.06 NM_054016.1    | splicing factor                                                                           |
| <b>TWF1</b>         | 0.13  | -1.06 NM_002822.3    | twinfilin                                                                                 |
| <b>CCDC74B</b>      | 0.11  | -1.06 NM_207310.1    | coiled-coil domain containing 74B (CCDC74B)                                               |
| <b>ARL15</b>        | 0.1   | -1.06 NM_019087.1    | ADP-ribosylation factor-like 15 (ARL15)                                                   |
| <b>G3BP2</b>        | 0.08  | -1.06 NM_203504.1    | GTPase activating protein (SH3 domain) binding protein 2 (G3BP2)                          |
| <b>ARHGEF16</b>     | 0.06  | -1.06 NM_014448.2    | Rho guanine exchange factor (GEF) 16 (ARHGEF16)                                           |
| <b>GFPT1</b>        | 0.04  | -1.06 NM_002056.1    | glutamine-fructose-6-phosphate transaminase 1 (GFPT1)                                     |
| <b>COL4A3BP</b>     | 0.02  | -1.06 NM_005713.1    | collagen                                                                                  |
| <b>NPR3</b>         | 0.02  | -1.06 NM_000908.2    | natriuretic peptide receptor C/guanylate cyclase C (atriuretic peptide receptor C) (NPR3) |
| <b>C9orf123</b>     | 0     | -1.06 NM_033428.1    | chromosome 9 open reading frame 123 (C9orf123)                                            |
| <b>LOC645236</b>    | -0.05 | -1.06 XM_928275.1    | PREDICTED: similar to similar to RPL23AP7 protein (LOC645236)                             |
| <b>ZNF395</b>       | -0.06 | -1.06 NM_018660.2    | zinc finger protein 395 (ZNF395)                                                          |
| <b>ARFIP1</b>       | -0.14 | -1.06 NM_001025593.1 | ADP-ribosylation factor interacting protein 1 (ARFIP1)                                    |
| <b>XBP1</b>         | -0.46 | -1.06 NM_001079539.1 | X-box binding protein 1 (XBP1)                                                            |
| <b>LOC729208</b>    | -1.29 | -1.06 XR_039643.1    | PREDICTED: misc_RNA (LOC729208)                                                           |
| <b>HNRNPAB</b>      | -1.34 | -1.06 NM_004499.3    | heterogeneous nuclear ribonucleoprotein A/B (HNRNPAB)                                     |
| <b>TMEM14C</b>      | -1.58 | -1.06 NM_016462.2    | transmembrane protein 14C (TMEM14C)                                                       |
| <b>MRPL51</b>       | -1.59 | -1.06 NM_016497.2    | mitochondrial ribosomal protein L51 (MRPL51)                                              |
| <b>ATP5H</b>        | -1.71 | -1.06 NM_006356.2    | ATP synthase                                                                              |
| <b>AKR1B1</b>       | -1.8  | -1.06 NM_001628.2    | aldo-keto reductase family 1                                                              |
| <b>C17orf45</b>     | -1.94 | -1.06 NM_152350.2    | chromosome 17 open reading frame 45 (C17orf45)                                            |
| <b>LOC134997</b>    | -2.12 | -1.06 NR_000030.1    | peptidylprolyl isomerase A processed pseudogene (LOC134997) on chromosome 6.              |
| <b>ATP5B</b>        | -2.18 | -1.06 NM_001686.3    | ATP synthase                                                                              |

|              |       |       |                |                                                                                                        |
|--------------|-------|-------|----------------|--------------------------------------------------------------------------------------------------------|
| RPS3A        | -2.27 | -1.06 | NM_001006.3    | ribosomal protein S3A (RPS3A)                                                                          |
| MGC16703     | -2.35 | -1.06 | NM_145042.2    | tubulin                                                                                                |
| RN7SL1       | -2.44 | -1.06 | NR_002715.1    | RNA                                                                                                    |
| MSH3         | -2.45 | -1.06 | NM_002439.2    | mutS homolog 3 (E. coli) (MSH3)                                                                        |
| DPH2         | 0.2   | -1.07 | NM_001384.4    | DPH2 homolog (S. cerevisiae) (DPH2)                                                                    |
| MYADM        | 0.18  | -1.07 | NM_138373.3    | myeloid-associated differentiation marker (MYADM)                                                      |
| THOC2        | 0.18  | -1.07 | NM_001081550.1 | THO complex 2 (THOC2)                                                                                  |
| LPCAT2       | 0.17  | -1.07 | NM_017839.3    | lysophosphatidylcholine acyltransferase 2 (LPCAT2)                                                     |
| C3orf23      | 0.15  | -1.07 | NM_001029840.2 | chromosome 3 open reading frame 23 (C3orf23)                                                           |
| ATL2         | 0.14  | -1.07 | NM_022374.1    | atlastin GTPase 2 (ATL2)                                                                               |
| MAP4K4       | 0.12  | -1.07 | NM_145687.2    | mitogen-activated protein kinase kinase kinase 4 (MAP4K4)                                              |
| MEX3B        | 0.12  | -1.07 | NM_032246.3    | mex-3 homolog B (C. elegans) (MEX3B)                                                                   |
| CXorf38      | 0.11  | -1.07 | NM_144970.1    | chromosome X open reading frame 38 (CXorf38)                                                           |
| AMMECR1      | 0.1   | -1.07 | NM_001025580.1 | Alport syndrome                                                                                        |
| AVPR2        | 0.1   | -1.07 | NM_000054.2    | arginine vasopressin receptor 2 (nephrogenic diabetes insipidus) (AVPR2)                               |
| RIF1         | 0.1   | -1.07 | NM_018151.3    | RAP1 interacting factor homolog (yeast) (RIF1)                                                         |
| SDHALP1      | 0.09  | -1.07 | NR_003264.1    | succinate dehydrogenase complex                                                                        |
| ARHGAP19     | 0.08  | -1.07 | NM_032900.4    | Rho GTPase activating protein 19 (ARHGAP19)                                                            |
| LOC100130289 | 0.06  | -1.07 | XR_039781.1    | PREDICTED: misc_RNA (LOC100130289)                                                                     |
| SYNJ2        | 0.04  | -1.07 | NM_003898.2    | synaptojanin 2 (SYNJ2)                                                                                 |
| LOC729687    | 0.03  | -1.07 | XM_001725257.1 | PREDICTED: hypothetical LOC729687 (LOC729687)                                                          |
| SEC31A       | -0.03 | -1.07 | NM_014933.2    | SEC31 homolog A (S. cerevisiae) (SEC31A)                                                               |
| SERF2        | -0.07 | -1.07 | NM_001018108.2 | small EDRK-rich factor 2 (SERF2)                                                                       |
| RPL32        | -0.21 | -1.07 | NM_001007073.1 | ribosomal protein L32 (RPL32)                                                                          |
| FANCE        | -0.22 | -1.07 | NM_021922.2    | Fanconi anemia                                                                                         |
| PTGES2       | -0.25 | -1.07 | NM_198938.1    | prostaglandin E synthase 2 (PTGES2)                                                                    |
| HMBS         | -0.3  | -1.07 | NM_000190.3    | hydroxymethylbilane synthase (HMBS)                                                                    |
| MRPL1        | -0.31 | -1.07 | NM_020236.2    | mitochondrial ribosomal protein L1 (MRPL1)                                                             |
| NME7         | -0.37 | -1.07 | NM_013330.3    | non-metastatic cells 7                                                                                 |
| SAP30        | -0.39 | -1.07 | NM_003864.3    | Sin3A-associated protein                                                                               |
| PPIL5        | -0.53 | -1.07 | NM_203467.1    | peptidylprolyl isomerase (cyclophilin)-like 5 (PPIL5)                                                  |
| STIP1        | -0.82 | -1.07 | NM_006819.1    | stress-induced-phosphoprotein 1 (Hsp70/Hsp90-organizing protein) (STIP1)                               |
| FAM129B      | -1.16 | -1.07 | NM_022833.2    | family with sequence similarity 129                                                                    |
| SEC61B       | -1.5  | -1.07 | NM_006808.2    | Sec61 beta subunit (SEC61B)                                                                            |
| PSMC5        | -1.51 | -1.07 | NM_002805.4    | proteasome (prosome)                                                                                   |
| MRPS21       | -1.6  | -1.07 | NM_018997.1    | mitochondrial ribosomal protein S21 (MRPS21)                                                           |
| LOC644790    | -1.66 | -1.07 | XM_927887.3    | PREDICTED: hypothetical LOC644790 (LOC644790)                                                          |
| EIF4B        | -1.68 | -1.07 | NM_001417.4    | eukaryotic translation initiation factor 4B (EIF4B)                                                    |
| LOC100130003 | -1.71 | -1.07 | XR_038699.1    | PREDICTED: misc_RNA (LOC100130003)                                                                     |
| LOC728820    | -1.91 | -1.07 | XR_038223.1    | PREDICTED: misc_RNA (LOC728820)                                                                        |
| LOC649821    | -1.97 | -1.07 | XM_942212.1    | PREDICTED: similar to 60S ribosomal protein L14 (CAG-ISL 7)                                            |
| PRDX5        | -1.98 | -1.07 | NM_181652.1    | peroxiredoxin 5 (PRDX5)                                                                                |
| LOC653314    | -2    | -1.07 | NM_001080544.1 | similar to ribosomal protein L19 (LOC653314)                                                           |
| TXN          | -2.09 | -1.07 | NM_003329.2    | thioredoxin (TXN)                                                                                      |
| LOC283412    | -2.22 | -1.07 | XM_938790.2    | PREDICTED: similar to 60S ribosomal protein L29 (Cell surface heparin-binding protein HIP) (LOC283412) |
| FLJ43681     | -2.26 | -1.07 | XR_015857.2    | PREDICTED: similar to 60S ribosomal protein L23a (FLJ43681)                                            |
| LOC647856    | -2.28 | -1.07 | XR_019580.1    | PREDICTED: similar to 40S ribosomal protein SA (p40) (34/67 kDa laminin receptor)                      |
| PRDX1        | -2.32 | -1.07 | NM_181696.1    | peroxiredoxin 1 (PRDX1)                                                                                |
| PDCD7        | -2.34 | -1.07 | NM_005707.1    | programmed cell death 7 (PDCD7)                                                                        |

|              |       |                      |                                                                                      |
|--------------|-------|----------------------|--------------------------------------------------------------------------------------|
| CLEC2D       | -2.44 | -1.07 NM_013269.3    | C-type lectin domain family 2                                                        |
| PPIAL4A      | -2.45 | -1.07 NM_178230.1    | peptidylprolyl isomerase A (cyclophilin A)-like 4A (PPIAL4A)                         |
| LOC729439    | -2.52 | -1.07 XM_001723745.1 | PREDICTED: similar to HGC6.4 (LOC729439)                                             |
| SNRPD3       | 0.2   | -1.08 NM_004175.3    | small nuclear ribonucleoprotein D3 polypeptide 18kDa (SNRPD3)                        |
| ARMCX3       | 0.18  | -1.08 NM_177947.2    | armadillo repeat containing                                                          |
| MNS1         | 0.13  | -1.08 NM_018365.1    | meiosis-specific nuclear structural 1 (MNS1)                                         |
| RABGAP1L     | 0.13  | -1.08 NM_001035230.1 | RAB GTPase activating protein 1-like (RABGAP1L)                                      |
| RB1          | 0.13  | -1.08 NM_000321.2    | retinoblastoma 1 (RB1)                                                               |
| RPS6KA3      | 0.12  | -1.08 NM_004586.2    | ribosomal protein S6 kinase                                                          |
| ZEB2         | 0.11  | -1.08 NM_014795.2    | zinc finger E-box binding homeobox 2 (ZEB2)                                          |
| LOC100131360 | 0.1   | -1.08 XR_037562.1    | PREDICTED: misc_RNA (LOC100131360)                                                   |
| FCGR3B       | 0.09  | -1.08 NM_000570.2    | Fc fragment of IgG                                                                   |
| SIX2         | 0.09  | -1.08 NM_016932.3    | SIX homeobox 2 (SIX2)                                                                |
| SRPK2        | 0.09  | -1.08 NM_182691.1    | SFRS protein kinase 2 (SRPK2)                                                        |
| SNCA         | 0.07  | -1.08 NM_000345.2    | synuclein                                                                            |
| WDFY2        | 0.07  | -1.08 NM_052950.2    | WD repeat and FYVE domain containing 2 (WDFY2)                                       |
| ASB7         | 0.05  | -1.08 NM_024708.2    | ankyrin repeat and SOCS box-containing 7 (ASB7)                                      |
| LOC100132973 | 0.05  | -1.08 XM_001726567.1 | PREDICTED: similar to elongin C (LOC100132973)                                       |
| TNFAIP8      | 0.05  | -1.08 NM_001077654.1 | tumor necrosis factor                                                                |
| IL1A         | 0.04  | -1.08 NM_000575.3    | interleukin 1                                                                        |
| WTAP         | 0.04  | -1.08 NM_004906.3    | Wilms tumor 1 associated protein (WTAP)                                              |
| GPC5         | -0.02 | -1.08 NM_004466.3    | glypican 5 (GPC5)                                                                    |
| LOC653994    | -0.02 | -1.08 XM_944429.1    | PREDICTED: similar to eukaryotic translation initiation factor 4H isoform 2          |
| FEZ1         | -0.04 | -1.08 NM_005103.3    | fasciculation and elongation protein zeta 1 (zygin I) (FEZ1)                         |
| KIAA1618     | -0.04 | -1.08 NM_020954.2    | KIAA1618 (KIAA1618)                                                                  |
| SEC24D       | -0.04 | -1.08 NM_014822.1    | SEC24 related gene family                                                            |
| GSR          | -0.05 | -1.08 NM_000637.2    | glutathione reductase (GSR)                                                          |
| MNS1         | -0.18 | -1.08 NM_018365.1    | meiosis-specific nuclear structural 1 (MNS1)                                         |
| LOC644037    | -0.25 | -1.08 XR_038280.1    | PREDICTED: misc_RNA (LOC644037)                                                      |
| FRMD8        | -0.42 | -1.08 NM_031904.3    | FERM domain containing 8 (FRMD8)                                                     |
| WDR33        | -0.5  | -1.08 NM_001006622.1 | WD repeat domain 33 (WDR33)                                                          |
| LOC442727    | -0.62 | -1.08 XR_017503.2    | PREDICTED: misc_RNA (LOC442727)                                                      |
| XBP1         | -0.7  | -1.08 NM_005080.2    | X-box binding protein 1 (XBP1)                                                       |
| GRIPAP1      | -0.87 | -1.08 NM_207672.1    | GRIP1 associated protein 1 (GRIPAP1)                                                 |
| NDUFB5       | -1.55 | -1.08 NM_002492.2    | NADH dehydrogenase (ubiquinone) 1 beta subcomplex                                    |
| POLR1D       | -1.58 | -1.08 NM_015972.2    | polymerase (RNA) I polypeptide D                                                     |
| LOC729340    | -1.63 | -1.08 XR_039650.1    | PREDICTED: misc_RNA (LOC729340)                                                      |
| EIF3L        | -1.73 | -1.08 NM_016091.2    | eukaryotic translation initiation factor 3                                           |
| MYL12A       | -1.73 | -1.08 NM_006471.2    | myosin                                                                               |
| FSCN1        | -1.75 | -1.08 NM_003088.2    | fascin homolog 1                                                                     |
| RPL36AL      | -1.85 | -1.08 NM_001001.3    | ribosomal protein L36a-like (RPL36AL)                                                |
| NDUFA4       | -1.89 | -1.08 NM_002489.2    | NADH dehydrogenase (ubiquinone) 1 alpha subcomplex                                   |
| ATP5H        | -1.91 | -1.08 NM_001003785.1 | ATP synthase                                                                         |
| PSMB7        | -1.99 | -1.08 NM_002799.2    | proteasome (prosome)                                                                 |
| LOC284821    | -2.03 | -1.08 XR_016232.1    | PREDICTED: similar to ribosomal protein L13a (LOC284821)                             |
| CHCHD2       | -2.06 | -1.08 NM_016139.2    | coiled-coil-helix-coiled-coil-helix domain containing 2 (CHCHD2)                     |
| TOMM7        | -2.09 | -1.08 NM_019059.2    | translocase of outer mitochondrial membrane 7 homolog (yeast) (TOMM7)                |
| LOC729090    | -2.11 | -1.08 XR_015449.2    | PREDICTED: similar to Eukaryotic translation elongation factor 1 alpha 1 (LOC729090) |
| LOC401537    | -2.14 | -1.08 XR_038712.1    | PREDICTED: misc_RNA (LOC401537)                                                      |

|              |       |                      |                                                                                               |
|--------------|-------|----------------------|-----------------------------------------------------------------------------------------------|
| LOC646294    | -2.15 | -1.08 XR_019565.2    | PREDICTED: misc_RNA (LOC646294)                                                               |
| XPNPEP3      | -2.19 | -1.08 NM_022098.2    | X-prolyl aminopeptidase (aminopeptidase P) 3                                                  |
| LOC388654    | -2.24 | -1.08 XM_371273.3    | PREDICTED: similar to laminin receptor 1 (ribosomal protein SA) (LOC388654)                   |
| RPL3         | -2.28 | -1.08 NM_001033853.1 | ribosomal protein L3 (RPL3)                                                                   |
| RPL5         | -2.28 | -1.08 NM_000969.3    | ribosomal protein L5 (RPL5)                                                                   |
| RPS3A        | -2.37 | -1.08 NM_001006.3    | ribosomal protein S3A (RPS3A)                                                                 |
| LOC441073    | -2.39 | -1.08 XR_018937.2    | PREDICTED: misc_RNA (LOC441073)                                                               |
| RPL6         | -2.4  | -1.08 NM_001024662.1 | ribosomal protein L6 (RPL6)                                                                   |
| LOC389141    | -2.44 | -1.08 XR_016945.2    | PREDICTED: misc_RNA (LOC389141)                                                               |
| IVD          | 0.14  | -1.09 NM_002225.2    | isovaleryl Coenzyme A dehydrogenase (IVD)                                                     |
| OSBPL8       | 0.14  | -1.09 NM_020841.4    | oxysterol binding protein-like 8 (OSBPL8)                                                     |
| VEGFA        | 0.13  | -1.09 NM_001025367.1 | vascular endothelial growth factor A (VEGFA)                                                  |
| MRI1         | 0.11  | -1.09 NM_001031727.2 | methylthioribose-1-phosphate isomerase homolog (S. cerevisiae) (MRI1)                         |
| RBBP5        | 0.06  | -1.09 NM_005057.2    | retinoblastoma binding protein 5 (RBBP5)                                                      |
| DIXDC1       | 0.02  | -1.09 NM_001037954.2 | DIX domain containing 1 (DIXDC1)                                                              |
| CCPG1        | 0     | -1.09 NM_020739.2    | cell cycle progression 1 (CCPG1)                                                              |
| TMEM22       | 0     | -1.09 NM_001097599.1 | transmembrane protein 22 (TMEM22)                                                             |
| CDK5RAP2     | -0.04 | -1.09 NM_001011649.1 | CDK5 regulatory subunit associated protein 2 (CDK5RAP2)                                       |
| HNMT         | -0.04 | -1.09 NM_006895.2    | histamine N-methyltransferase (HNMT)                                                          |
| SS18         | -0.05 | -1.09 NM_005637.2    | synovial sarcoma translocation                                                                |
| C17orf48     | -0.06 | -1.09 NM_020233.4    | chromosome 17 open reading frame 48 (C17orf48)                                                |
| KCTD9        | -0.16 | -1.09 NM_017634.2    | potassium channel tetramerisation domain containing 9 (KCTD9)                                 |
| HSPA1B       | -0.22 | -1.09 NM_005346.3    | heat shock 70kDa protein 1B (HSPA1B)                                                          |
| FBXO11       | -0.27 | -1.09 NM_025133.3    | F-box protein 11 (FBXO11)                                                                     |
| TOR1AIP1     | -0.3  | -1.09 NM_015602.2    | torsin A interacting protein 1 (TOR1AIP1)                                                     |
| ITPRIP       | -0.34 | -1.09 NM_033397.2    | inositol 1                                                                                    |
| ACYP1        | -0.38 | -1.09 NM_001107.3    | acylphosphatase 1                                                                             |
| PTPN12       | -0.42 | -1.09 NM_002835.2    | protein tyrosine phosphatase                                                                  |
| MMGT1        | -0.56 | -1.09 NM_173470.1    | membrane magnesium transporter 1 (MMGT1)                                                      |
| COASY        | -0.93 | -1.09 NM_001042532.1 | Coenzyme A synthase (COASY)                                                                   |
| PTGES2       | -0.95 | -1.09 NM_198938.1    | prostaglandin E synthase 2 (PTGES2)                                                           |
| PARL         | -0.96 | -1.09 NM_001037639.1 | presenilin associated                                                                         |
| FAM50A       | -1.54 | -1.09 NM_004699.1    | family with sequence similarity 50                                                            |
| NFKBIA       | -1.57 | -1.09 NM_020529.1    | nuclear factor of kappa light polypeptide gene enhancer in B-cells inhibitor                  |
| NDUFB3       | -1.62 | -1.09 NM_002491.1    | NADH dehydrogenase (ubiquinone) 1 beta subcomplex                                             |
| NHP2         | -1.67 | -1.09 NM_017838.3    | NHP2 ribonucleoprotein homolog (yeast) (NHP2)                                                 |
| IFITM3       | -1.76 | -1.09 NM_021034.2    | interferon induced transmembrane protein 3 (1-8U) (IFITM3)                                    |
| LOC648390    | -1.82 | -1.09 XR_037845.1    | PREDICTED: misc_RNA (LOC648390)                                                               |
| LOC652624    | -1.94 | -1.09 XM_942165.1    | PREDICTED: similar to 40S ribosomal protein SA (p40) (34/67 kDa laminin receptor) (LOC652624) |
| LOC646630    | -2.1  | -1.09 XM_929572.1    | PREDICTED: similar to Coiled-coil-helix-coiled-coil-helix domain containing protein 2         |
| HSPD1        | -2.18 | -1.09 NM_002156.4    | heat shock 60kDa protein 1 (chaperonin) (HSPD1)                                               |
| LOC391126    | -2.25 | -1.09 XR_017684.2    | PREDICTED: misc_RNA (LOC391126)                                                               |
| LOC100132673 | -2.36 | -1.09 XR_039018.1    | PREDICTED: misc_RNA (LOC100132673)                                                            |
| TXN          | -2.39 | -1.09 NM_003329.2    | thioredoxin (TXN)                                                                             |
| KIAA0101     | -2.43 | -1.09 NM_001029989.1 | KIAA0101 (KIAA0101)                                                                           |
| RPLP1        | -2.52 | -1.09 NM_213725.1    | ribosomal protein                                                                             |
| LOC100131387 | -2.54 | -1.09 XM_001725100.1 | PREDICTED: similar to mCG146274 (LOC100131387)                                                |
| RAB12        | 0.12  | -1.1 NM_001025300.2  | RAB12                                                                                         |
| FUT11        | 0.09  | -1.1 NM_173540.2     | fucosyltransferase 11 (alpha (1                                                               |

|                     |       |                     |                                                                                                          |
|---------------------|-------|---------------------|----------------------------------------------------------------------------------------------------------|
| <b>LOC728024</b>    | 0.09  | -1.1 NR_003671.1    | hCG1640171 (LOC728024)                                                                                   |
| <b>BMP2K</b>        | 0.06  | -1.1 NM_017593.3    | BMP2 inducible kinase (BMP2K)                                                                            |
| <b>HNRPK</b>        | 0.04  | -1.1 NM_031263.1    | heterogeneous nuclear ribonucleoprotein K (HNRPK)                                                        |
| <b>DNAJB14</b>      | 0.02  | -1.1 NM_001031723.1 | DnaJ (Hsp40) homolog                                                                                     |
| <b>LOC650254</b>    | 0.01  | -1.1 XM_499385.2    | PREDICTED: similar to hypothetical protein FLJ40722                                                      |
| <b>SLC47A1</b>      | 0     | -1.1 NM_018242.2    | solute carrier family 47                                                                                 |
| <b>TCTN3</b>        | -0.01 | -1.1 NM_015631.4    | tectonic family member 3 (TCTN3)                                                                         |
| <b>LOC642513</b>    | -0.02 | -1.1 XR_016174.2    | PREDICTED: misc_RNA (LOC642513)                                                                          |
| <b>PEX11A</b>       | -0.03 | -1.1 NM_003847.1    | peroxisomal biogenesis factor 11 alpha (PEX11A)                                                          |
| <b>PPWD1</b>        | -0.05 | -1.1 NM_015342.1    | peptidylprolyl isomerase domain and WD repeat containing 1 (PPWD1)                                       |
| <b>PRPF18</b>       | -0.05 | -1.1 NM_003675.3    | PRP18 pre-mRNA processing factor 18 homolog (S. cerevisiae) (PRPF18)                                     |
| <b>ZNF326</b>       | -0.05 | -1.1 NM_182976.1    | zinc finger protein 326 (ZNF326)                                                                         |
| <b>ZP3</b>          | -0.05 | -1.1 NM_007155.4    | zona pellucida glycoprotein 3 (sperm receptor) (ZP3)                                                     |
| <b>CDC42SE1</b>     | -0.06 | -1.1 NM_001038707.1 | CDC42 small effector 1 (CDC42SE1)                                                                        |
| <b>TMX4</b>         | -0.06 | -1.1 NM_021156.2    | thioredoxin-related transmembrane protein 4 (TMX4)                                                       |
| <b>PVRL3</b>        | -0.08 | -1.1 NM_015480.1    | poliovirus receptor-related 3 (PVRL3)                                                                    |
| <b>TAF7</b>         | -0.16 | -1.1 NM_005642.2    | TAF7 RNA polymerase II                                                                                   |
| <b>C19orf6</b>      | -0.21 | -1.1 NM_001033026.1 | chromosome 19 open reading frame 6 (C19orf6)                                                             |
| <b>MSRB3</b>        | -0.21 | -1.1 NM_198080.2    | methionine sulfoxide reductase B3 (MSRB3)                                                                |
| <b>SELS</b>         | -0.21 | -1.1 NM_018445.4    | selenoprotein S (SELS)                                                                                   |
| <b>MTA2</b>         | -0.27 | -1.1 NM_004739.2    | metastasis associated 1 family                                                                           |
| <b>NDC80</b>        | -0.28 | -1.1 NM_006101.1    | NDC80 homolog                                                                                            |
| <b>DNAJC10</b>      | -0.43 | -1.1 NM_018981.1    | DnaJ (Hsp40) homolog                                                                                     |
| <b>C7orf11</b>      | -0.44 | -1.1 NM_138701.1    | chromosome 7 open reading frame 11 (C7orf11)                                                             |
| <b>RNGTT</b>        | -0.47 | -1.1 NM_003800.3    | RNA guanylyltransferase and 5'-phosphatase (RNGTT)                                                       |
| <b>TPX2</b>         | -0.53 | -1.1 NM_012112.4    | TPX2                                                                                                     |
| <b>SKA2</b>         | -0.56 | -1.1 NM_182620.3    | spindle and kinetochore associated complex subunit 2 (SKA2)                                              |
| <b>REXO4</b>        | -0.77 | -1.1 NM_020385.2    | REX4                                                                                                     |
| <b>DDAH1</b>        | -0.81 | -1.1 NM_012137.2    | dimethylarginine dimethylaminohydrolase 1 (DDAH1)                                                        |
| <b>YWHAG</b>        | -0.96 | -1.1 NM_012479.2    | tyrosine 3-monooxygenase/tryptophan 5-monooxygenase activation protein                                   |
| <b>XRCC6</b>        | -1.37 | -1.1 NM_001469.3    | X-ray repair complementing defective repair in Chinese hamster cells 6 (XRCC6)                           |
| <b>DMC1</b>         | -1.38 | -1.1 NM_007068.2    | DMC1 dosage suppressor of mck1 homolog                                                                   |
| <b>LOC727984</b>    | -1.38 | -1.1 XR_015259.2    | PREDICTED: misc_RNA (LOC727984)                                                                          |
| <b>C8orf37</b>      | -1.59 | -1.1 NM_177965.2    | chromosome 8 open reading frame 37 (C8orf37)                                                             |
| <b>SDHB</b>         | -1.68 | -1.1 NM_003000.2    | succinate dehydrogenase complex                                                                          |
| <b>LOC389787</b>    | -1.84 | -1.1 XM_497072.2    | PREDICTED: similar to Translationally-controlled tumor protein (TCTP) (p23) (Histamine-releasing factor) |
| <b>PRDX5</b>        | -1.85 | -1.1 NM_012094.3    | peroxiredoxin 5 (PRDX5)                                                                                  |
| <b>LOC645173</b>    | -2.02 | -1.1 XR_017590.2    | PREDICTED: misc_RNA (LOC645173)                                                                          |
| <b>SHFM1</b>        | -2.05 | -1.1 NM_006304.1    | split hand/foot malformation (ectrodactyly) type 1 (SHFM1)                                               |
| <b>LOC648249</b>    | -2.06 | -1.1 XM_944165.1    | PREDICTED: similar to 40S ribosomal protein SA (p40) (34/67 kDa laminin receptor)                        |
| <b>LOC649049</b>    | -2.06 | -1.1 XM_945192.1    | PREDICTED: similar to acidic ribosomal phosphoprotein P0                                                 |
| <b>LOC100131205</b> | -2.09 | -1.1 XM_001720494.1 | PREDICTED: hypothetical protein LOC100131205                                                             |
| <b>LOC653232</b>    | -2.1  | -1.1 XM_944104.2    | PREDICTED: hypothetical LOC653232                                                                        |
| <b>NOP10</b>        | -2.11 | -1.1 NM_018648.3    | NOP10 ribonucleoprotein homolog (yeast) (NOP10)                                                          |
| <b>LOC652235</b>    | -2.12 | -1.1 XM_941629.1    | PREDICTED: hypothetical protein LOC652235 (LOC652235)                                                    |
| <b>RPL36AL</b>      | -2.13 | -1.1 NM_001001.3    | ribosomal protein L36a-like (RPL36AL)                                                                    |
| <b>TOMM7</b>        | -2.14 | -1.1 NM_019059.2    | translocase of outer mitochondrial membrane 7 homolog (yeast) (TOMM7)                                    |
| <b>COX8A</b>        | -2.21 | -1.1 NM_004074.2    | cytochrome c oxidase subunit 8A (ubiquitous) (COX8A)                                                     |
| <b>HINT1</b>        | -2.25 | -1.1 NM_005340.3    | histidine triad nucleotide binding protein 1 (HINT1)                                                     |

|              |       |       |                |                                                                                                      |
|--------------|-------|-------|----------------|------------------------------------------------------------------------------------------------------|
| RPL17        | -2.3  | -1.1  | NM_001035006.1 | ribosomal protein L17 (RPL17)                                                                        |
| UQCRH        | -2.38 | -1.1  | NM_006004.2    | ubiquinol-cytochrome c reductase hinge protein (UQCRH)                                               |
| RPL3         | -2.47 | -1.1  | NM_001033853.1 | ribosomal protein L3 (RPL3)                                                                          |
| RPS6         | -2.61 | -1.1  | NM_001010.2    | ribosomal protein S6 (RPS6)                                                                          |
| TMSB10       | -2.62 | -1.1  | NM_021103.3    | thymosin beta 10 (TMSB10)                                                                            |
| LOC728553    | -2.67 | -1.1  | XR_015414.2    | PREDICTED: misc_RNA (LOC728553)                                                                      |
| MAP3K3       | 0.05  | -1.11 | NM_203351.1    | mitogen-activated protein kinase kinase kinase 3 (MAP3K3)                                            |
| ZDHHC13      | 0.04  | -1.11 | NM_001001483.1 | zinc finger                                                                                          |
| LOC730996    | 0     | -1.11 | XM_001128017.1 | PREDICTED: similar to chromosome 1 open reading frame 80 (LOC730996)                                 |
| PIBF1        | -0.03 | -1.11 | NM_006346.2    | progesterone immunomodulatory binding factor 1 (PIBF1)                                               |
| LDHA         | -0.05 | -1.11 | NM_005566.3    | lactate dehydrogenase A (LDHA)                                                                       |
| TRIM37       | -0.05 | -1.11 | NM_001005207.1 | tripartite motif-containing 37 (TRIM37)                                                              |
| GAGE2B       | -0.13 | -1.11 | NM_001098411.3 | G antigen 2B (GAGE2B)                                                                                |
| FAM54B       | -0.15 | -1.11 | NM_019557.5    | family with sequence similarity 54                                                                   |
| PARP3        | -0.15 | -1.11 | NM_001003931.1 | poly (ADP-ribose) polymerase family                                                                  |
| WDR33        | -0.16 | -1.11 | NM_001006622.1 | WD repeat domain 33 (WDR33)                                                                          |
| ZNF16        | -0.16 | -1.11 | NM_006958.2    | zinc finger protein 16 (ZNF16)                                                                       |
| ALDH2        | -0.19 | -1.11 | NM_000690.2    | aldehyde dehydrogenase 2 family (mitochondrial) (ALDH2)                                              |
| CORO7        | -0.19 | -1.11 | NM_024535.2    | coronin 7 (CORO7)                                                                                    |
| NUF2         | -0.22 | -1.11 | NM_031423.3    | NUF2                                                                                                 |
| C1GALT1C1    | -0.29 | -1.11 | NM_152692.3    | C1GALT1-specific chaperone 1 (C1GALT1C1)                                                             |
| MSL3         | -0.3  | -1.11 | NM_078629.2    | male-specific lethal 3 homolog (Drosophila) (MSL3)                                                   |
| RAPGEF2      | -0.37 | -1.11 | NM_014247.2    | Rap guanine nucleotide exchange factor (GEF) 2 (RAPGEF2)                                             |
| UBE2H        | -0.38 | -1.11 | NM_003344.2    | ubiquitin-conjugating enzyme E2H (UBC8 homolog)                                                      |
| EHBP1        | -0.42 | -1.11 | NM_015252.2    | EH domain binding protein 1 (EHBP1)                                                                  |
| LOC100128771 | -0.44 | -1.11 | XR_037860.1    | PREDICTED: misc_RNA (LOC100128771)                                                                   |
| LAMP2        | -0.47 | -1.11 | NM_002294.1    | lysosomal-associated membrane protein 2 (LAMP2)                                                      |
| LOC728855    | -0.49 | -1.11 | NR_024510.1    | hypothetical LOC728855 (LOC728855)                                                                   |
| LOC645515    | -0.59 | -1.11 | XR_039410.1    | PREDICTED: misc_RNA (LOC645515)                                                                      |
| PARL         | -1.02 | -1.11 | NM_018622.5    | presenilin associated                                                                                |
| PMEPA1       | -1.18 | -1.11 | NM_199169.1    | prostate transmembrane protein                                                                       |
| ILF2         | -1.5  | -1.11 | NM_004515.2    | interleukin enhancer binding factor 2                                                                |
| EIF5A        | -1.56 | -1.11 | NM_001970.3    | eukaryotic translation initiation factor 5A (EIF5A)                                                  |
| PTTG3P       | -1.57 | -1.11 | NR_002734.1    | pituitary tumor-transforming 3 (pseudogene) (PTTG3P)                                                 |
| TALDO1       | -1.57 | -1.11 | NM_006755.1    | PREDICTED: transaldolase 1 (TALDO1)                                                                  |
| COX6B1       | -1.58 | -1.11 | NM_001863.3    | cytochrome c oxidase subunit V <sub>ib</sub> polypeptide 1 (ubiquitous) (COX6B1)                     |
| LOC727865    | -1.7  | -1.11 | XR_038568.1    | PREDICTED: misc_RNA (LOC727865)                                                                      |
| PCBP2        | -1.74 | -1.11 | NM_001098620.1 | poly(rC) binding protein 2 (PCBP2)                                                                   |
| DDIT4        | -1.85 | -1.11 | NM_019058.2    | DNA-damage-inducible transcript 4 (DDIT4)                                                            |
| LOC730255    | -1.89 | -1.11 | XR_039376.1    | PREDICTED: misc_RNA (LOC730255)                                                                      |
| LOC729236    | -1.99 | -1.11 | XR_016041.2    | PREDICTED: misc_RNA (LOC729236)                                                                      |
| CHCHD9       | -2    | -1.11 | XM_928381.2    | PREDICTED: coiled-coil-helix-coiled-coil-helix domain containing 9 (CHCHD9)                          |
| ATP5A1       | -2.02 | -1.11 | NM_004046.4    | ATP synthase                                                                                         |
| COX5B        | -2.02 | -1.11 | NM_001862.2    | cytochrome c oxidase subunit V <sub>b</sub> (COX5B)                                                  |
| AURKAIP1     | -2.04 | -1.11 | NM_017900.1    | aurora kinase A interacting protein 1 (AURKAIP1)                                                     |
| LOC728973    | -2.08 | -1.11 | XR_015809.1    | PREDICTED: similar to 40S ribosomal protein S7 (S8) (LOC728973)                                      |
| LOC646531    | -2.09 | -1.11 | XR_018197.1    | PREDICTED: similar to nuclease sensitive element binding protein 1 (LOC646531)                       |
| LOC285900    | -2.3  | -1.11 | XM_926623.1    | PREDICTED: similar to 60S ribosomal protein L6 (TAX-responsive enhancer element binding protein 107) |
| LOC646785    | -2.42 | -1.11 | XR_017607.1    | PREDICTED: misc_RNA (LOC646785)                                                                      |

|           |       |                      |                                                                    |
|-----------|-------|----------------------|--------------------------------------------------------------------|
| POTEF     | -2.47 | -1.11 NM_001099771.1 | POTE ankyrin domain family                                         |
| UQCRHL    | -2.47 | -1.11 NM_001089591.1 | ubiquinol-cytochrome c reductase hinge protein-like (UQCRHL)       |
| LOC645296 | -2.53 | -1.11 NM_001093733.2 | ribosomal protein L17-like (LOC645296)                             |
| LOC391777 | -2.63 | -1.11 XR_040304.1    | PREDICTED: misc_RNA (LOC391777)                                    |
| CRIM1     | -0.02 | -1.12 NM_016441.1    | cysteine rich transmembrane BMP regulator 1 (chordin-like) (CRIM1) |
| ABI2      | -0.08 | -1.12 XM_001126750.1 | PREDICTED: abl interactor 2 (ABI2)                                 |
| UBA3      | -0.1  | -1.12 NM_198195.1    | ubiquitin-like modifier activating enzyme 3 (UBA3)                 |
| MAP4      | -0.11 | -1.12 NM_002375.3    | microtubule-associated protein 4 (MAP4)                            |
| MIR129-2  | -0.14 | -1.12 NR_029697.1    | microRNA 129-2 (MIR129-2)                                          |
| CLIC4     | -0.16 | -1.12 NM_013943.1    | chloride intracellular channel 4 (CLIC4)                           |
| ZNF280D   | -0.19 | -1.12 NM_001002843.1 | zinc finger protein 280D (ZNF280D)                                 |
| LOC401152 | -0.2  | -1.12 NM_001001701.1 | HCV F-transactivated protein 1 (LOC401152)                         |
| RAP1GAP   | -0.2  | -1.12 NM_002885.1    | RAP1 GTPase activating protein (RAP1GAP)                           |
| LYRM7     | -0.24 | -1.12 NM_181705.2    | Lym7 homolog (mouse) (LYRM7)                                       |
| GOLPH4    | -0.25 | -1.12 NM_014498.2    | golgi phosphoprotein 4 (GOLPH4)                                    |
| C1QTNF1   | -0.27 | -1.12 NM_198594.1    | C1q and tumor necrosis factor related protein 1 (C1QTNF1)          |
| PRKAG1    | -0.27 | -1.12 NM_002733.3    | protein kinase                                                     |
| TOM1      | -0.29 | -1.12 NM_005488.1    | target of myb1 (chicken) (TOM1)                                    |
| PVRL3     | -0.3  | -1.12 NM_015480.1    | poliovirus receptor-related 3 (PVRL3)                              |
| SPAG9     | -0.31 | -1.12 NM_003971.3    | sperm associated antigen 9 (SPAG9)                                 |
| RIMKLB    | -0.32 | -1.12 NM_020734.2    | ribosomal modification protein rimK-like family member B (RIMKLB)  |
| TTC27     | -0.33 | -1.12 NM_017735.3    | tetratricopeptide repeat domain 27 (TTC27)                         |
| CDT1      | -0.37 | -1.12 NM_030928.2    | chromatin licensing and DNA replication factor 1 (CDT1)            |
| CLK1      | -0.37 | -1.12 NM_004071.2    | CDC-like kinase 1 (CLK1)                                           |
| FAM36A    | -0.38 | -1.12 NM_198076.4    | family with sequence similarity 36                                 |
| AMD1      | -0.4  | -1.12 NM_001634.4    | adenosylmethionine decarboxylase 1 (AMD1)                          |
| LOC440354 | -0.47 | -1.12 NR_002473.2    | PI-3-kinase-related kinase SMG-1 pseudogene (LOC440354)            |
| DLGAP5    | -0.49 | -1.12 NM_014750.3    | discs                                                              |
| EFNA1     | -0.77 | -1.12 NM_004428.2    | ephrin-A1 (EFNA1)                                                  |
| SPOCK1    | -0.77 | -1.12 NM_004598.3    | sparc/osteonectin                                                  |
| RHOQ      | -1.05 | -1.12 NM_012249.3    | ras homolog gene family                                            |
| RPL29     | -1.28 | -1.12 NM_000992.2    | ribosomal protein L29 (RPL29)                                      |
| HDAC1     | -1.55 | -1.12 NM_004964.2    | histone deacetylase 1 (HDAC1)                                      |
| PHPT1     | -1.59 | -1.12 NM_014172.3    | phosphohistidine phosphatase 1 (PHPT1)                             |
| POFUT1    | -1.67 | -1.12 NM_015352.1    | protein O-fucosyltransferase 1 (POFUT1)                            |
| NUDC      | -1.72 | -1.12 NM_006600.2    | nuclear distribution gene C homolog (A. nidulans) (NUDC)           |
| SSR4      | -1.74 | -1.12 NM_006280.1    | signal sequence receptor                                           |
| LOC550643 | -1.77 | -1.12 NR_015367.2    | hypothetical LOC550643 (LOC550643)                                 |
| QARS      | -1.8  | -1.12 NM_005051.1    | glutaminyl-tRNA synthetase (QARS)                                  |
| SNRPF     | -1.92 | -1.12 NM_003095.2    | small nuclear ribonucleoprotein polypeptide F (SNRPF)              |
| PSMB6     | -1.93 | -1.12 NM_002798.1    | proteasome (prosome)                                               |
| NDUFB2    | -1.95 | -1.12 NM_004546.2    | NADH dehydrogenase (ubiquinone) 1 beta subcomplex                  |
| LOC441506 | -2.21 | -1.12 XR_019580.2    | PREDICTED: misc_RNA (LOC441506)                                    |
| CFL1      | -2.25 | -1.12 NM_005507.2    | cofilin 1 (non-muscle) (CFL1)                                      |
| RPL26     | -2.26 | -1.12 NM_000987.3    | ribosomal protein L26 (RPL26)                                      |
| EIF3L     | -2.28 | -1.12 NM_016091.2    | eukaryotic translation initiation factor 3                         |
| LOC644745 | -2.38 | -1.12 XR_038862.1    | PREDICTED: misc_RNA (LOC644745)                                    |
| RPS2      | -2.47 | -1.12 NM_002952.3    | ribosomal protein S2 (RPS2)                                        |
| RPL31     | -2.51 | -1.12 NM_000993.4    | ribosomal protein L31 (RPL31)                                      |



|              |       |                      |                                                                  |
|--------------|-------|----------------------|------------------------------------------------------------------|
| PRDX1        | -2.52 | -1.12 NM_181696.1    | peroxiredoxin 1 (PRDX1)                                          |
| RPL14L       | -2.56 | -1.12 XR_041286.1    | PREDICTED: misc_RNA (RPL14L)                                     |
| RPL24        | -2.61 | -1.12 NM_000986.3    | ribosomal protein L24 (RPL24)                                    |
| RPS13        | -2.66 | -1.12 NM_001017.2    | ribosomal protein S13 (RPS13)                                    |
| LOC100133931 | -2.68 | -1.12 XM_001713654.1 | PREDICTED: hypothetical protein LOC100133931 (LOC100133931)      |
| RPS8         | -2.7  | -1.12 NM_001012.1    | ribosomal protein S8 (RPS8)                                      |
| RPL38        | -2.71 | -1.12 NM_000999.2    | ribosomal protein L38 (RPL38)                                    |
| RPSA         | -2.76 | -1.12 NM_002295.4    | ribosomal protein SA (RPSA)                                      |
| LOC440589    | -2.77 | -1.12 XM_942424.2    | PREDICTED: similar to ribosomal protein S2                       |
| RPS6         | -2.8  | -1.12 NM_001010.2    | ribosomal protein S6 (RPS6)                                      |
| ACTB         | -2.92 | -1.12 NM_001101.2    | actin                                                            |
| NEK7         | 0.02  | -1.13 NM_133494.1    | NIMA (never in mitosis gene a)-related kinase 7 (NEK7)           |
| TRIM29       | -0.01 | -1.13 NM_012101.3    | tripartite motif-containing 29 (TRIM29)                          |
| C6orf72      | -0.03 | -1.13 NM_138785.1    | chromosome 6 open reading frame 72 (C6orf72)                     |
| LOC401805    | -0.04 | -1.13 XR_038835.1    | PREDICTED: misc_RNA (LOC401805)                                  |
| UBE2H        | -0.05 | -1.13 NM_003344.2    | ubiquitin-conjugating enzyme E2H (UBC8 homolog)                  |
| LOC648509    | -0.09 | -1.13 XR_018376.1    | PREDICTED: similar to plakophilin 4 isoform a (LOC648509)        |
| CDK2         | -0.11 | -1.13 NM_001798.2    | cyclin-dependent kinase 2 (CDK2)                                 |
| UGP2         | -0.12 | -1.13 NM_006759.3    | UDP-glucose pyrophosphorylase 2 (UGP2)                           |
| HOXA13       | -0.13 | -1.13 NM_000522.3    | homeobox A13 (HOXA13)                                            |
| SCLT1        | -0.14 | -1.13 NM_144643.2    | sodium channel and clathrin linker 1 (SCLT1)                     |
| DTNBP1       | -0.15 | -1.13 NM_032122.3    | dystrobrevin binding protein 1 (DTNBP1)                          |
| SERF1A       | -0.15 | -1.13 NM_021967.1    | small EDRK-rich factor 1A (telomeric) (SERF1A)                   |
| MED26        | -0.17 | -1.13 NM_004831.3    | mediator complex subunit 26 (MED26)                              |
| INTS8        | -0.18 | -1.13 NM_017864.2    | integrator complex subunit 8 (INTS8)                             |
| LAMP2        | -0.18 | -1.13 NM_013995.1    | lysosomal-associated membrane protein 2 (LAMP2)                  |
| LOC654189    | -0.19 | -1.13 XM_942687.1    | PREDICTED: similar to heterogeneous nuclear ribonucleoprotein A3 |
| CASP6        | -0.2  | -1.13 NM_032992.2    | caspase 6                                                        |
| LOC653635    | -0.21 | -1.13 XR_017611.1    | PREDICTED: similar to CXYorf1-related protein (LOC653635)        |
| ZNF45        | -0.21 | -1.13 NM_003425.2    | zinc finger protein 45 (ZNF45)                                   |
| BMP1         | -0.22 | -1.13 NM_006129.2    | bone morphogenetic protein 1 (BMP1)                              |
| HSPA12A      | -0.23 | -1.13 NM_025015.2    | PREDICTED: heat shock 70kDa protein 12A                          |
| LIMS1        | -0.29 | -1.13 NM_004987.3    | PREDICTED: LIM and senescent cell antigen-like domains 1 (LIMS1) |
| LOC100130123 | -0.39 | -1.13 XM_001726844.1 | PREDICTED: similar to PRO2870 (LOC100130123)                     |
| RNF5         | -0.39 | -1.13 NM_006913.2    | ring finger protein 5 (RNF5)                                     |
| LOC729629    | -0.41 | -1.13 XM_001719967.1 | Yp11.32a                                                         |
| THOC2        | -0.51 | -1.13 NM_020449.2    | THO complex 2 (THOC2)                                            |
| PTPRF        | -0.62 | -1.13 NM_002840.3    | protein tyrosine phosphatase                                     |
| SS18         | -0.66 | -1.13 NM_005637.2    | synovial sarcoma translocation                                   |
| LOC651064    | -1.59 | -1.13 XM_944489.1    | PREDICTED: hypothetical protein LOC651064 (LOC651064)            |
| LOC728661    | -1.63 | -1.13 XM_001717735.1 | PREDICTED: similar to solute carrier family 35                   |
| TUBB         | -1.64 | -1.13 NM_178014.2    | tubulin                                                          |
| ODC1         | -1.65 | -1.13 NM_002539.1    | ornithine decarboxylase 1 (ODC1)                                 |
| CYC1         | -1.68 | -1.13 NM_001916.3    | cytochrome c-1 (CYC1)                                            |
| POLR2F       | -1.76 | -1.13 NM_021974.2    | polymerase (RNA) II (DNA directed) polypeptide F (POLR2F)        |
| ALDOA        | -1.77 | -1.13 NM_184043.1    | aldolase A                                                       |
| LOC647285    | -1.94 | -1.13 XR_019567.2    | PREDICTED: misc_RNA (LOC647285)                                  |
| LOC388339    | -1.97 | -1.13 XM_942039.3    | PREDICTED: similar to ribosomal protein                          |
| LOC647000    | -1.99 | -1.13 XM_929980.2    | PREDICTED: similar to tubulin                                    |

|              |       |                      |                                                                                                |
|--------------|-------|----------------------|------------------------------------------------------------------------------------------------|
| LOC730004    | -2    | -1.13 XR_039077.1    | PREDICTED: misc_RNA (LOC730004)                                                                |
| RPL14        | -2.02 | -1.13 NM_001034996.1 | ribosomal protein L14 (RPL14)                                                                  |
| LOC391833    | -2.07 | -1.13 XR_038761.1    | PREDICTED: misc_RNA (LOC391833)                                                                |
| EIF4A1       | -2.15 | -1.13 NM_001416.2    | eukaryotic translation initiation factor 4A                                                    |
| LOC389168    | -2.19 | -1.13 XR_019471.2    | PREDICTED: misc_RNA (LOC389168)                                                                |
| LOC644511    | -2.19 | -1.13 XM_941634.2    | PREDICTED: similar to ribosomal protein L13a                                                   |
| LOC730740    | -2.21 | -1.13 XM_001128558.1 | PREDICTED: similar to H3 histone                                                               |
| LOC646294    | -2.33 | -1.13 XR_019565.2    | PREDICTED: misc_RNA (LOC646294)                                                                |
| RPS27A       | -2.34 | -1.13 NM_002954.3    | ribosomal protein S27a (RPS27A)                                                                |
| LOC440926    | -2.47 | -1.13 NR_002315.1    | H3 histone                                                                                     |
| LOC729466    | -2.64 | -1.13 XR_015916.1    | PREDICTED: hypothetical protein LOC729466 (LOC729466)                                          |
| LOC387841    | -2.82 | -1.13 XM_370681.4    | PREDICTED: similar to ribosomal protein L13a                                                   |
| KLRC2        | -0.16 | -1.14 NM_002260.3    | killer cell lectin-like receptor subfamily C                                                   |
| WFDC1        | -0.17 | -1.14 NM_021197.2    | WAP four-disulfide core domain 1 (WFDC1)                                                       |
| SLC25A40     | -0.18 | -1.14 NM_018843.2    | solute carrier family 25                                                                       |
| SLTM         | -0.2  | -1.14 NM_024755.2    | SAFB-like                                                                                      |
| GOLIM4       | -0.21 | -1.14 NM_014498.3    | golgi integral membrane protein 4 (GOLIM4)                                                     |
| CLUL1        | -0.22 | -1.14 NM_014410.4    | clusterin-like 1 (retinal) (CLUL1)                                                             |
| LOC648581    | -0.22 | -1.14 XM_937648.2    | PREDICTED: similar to alveolar soft part sarcoma chromosome region                             |
| GNB4         | -0.23 | -1.14 NM_021629.3    | guanine nucleotide binding protein (G protein)                                                 |
| TBL3         | -0.23 | -1.14 NM_006453.2    | transducin (beta)-like 3 (TBL3)                                                                |
| KIF15        | -0.27 | -1.14 NM_020242.1    | kinesin family member 15 (KIF15)                                                               |
| C17orf81     | -0.36 | -1.14 NM_015362.3    | chromosome 17 open reading frame 81 (C17orf81)                                                 |
| UFM1         | -0.41 | -1.14 NM_016617.1    | ubiquitin-fold modifier 1 (UFM1)                                                               |
| DAG1         | -0.42 | -1.14 NM_004393.2    | dystroglycan 1 (dystrophin-associated glycoprotein 1) (DAG1)                                   |
| BARD1        | -0.49 | -1.14 NM_000465.1    | BRCA1 associated RING domain 1 (BARD1)                                                         |
| TIMP4        | -0.54 | -1.14 NM_003256.2    | TIMP metalloproteinase inhibitor 4 (TIMP4)                                                     |
| SNRPN        | -0.61 | -1.14 NM_022806.2    | small nuclear ribonucleoprotein polypeptide N (SNRPN)                                          |
| LOC652233    | -0.72 | -1.14 XM_941627.1    | PREDICTED: hypothetical protein LOC652233 (LOC652233)                                          |
| BSG          | -0.8  | -1.14 NM_198590.1    | basigin (Ok blood group) (BSG)                                                                 |
| XRCC2        | -0.92 | -1.14 NM_005431.1    | X-ray repair complementing defective repair in Chinese hamster cells 2 (XRCC2)                 |
| PSCD1        | -1.01 | -1.14 NM_017456.1    | pleckstrin homology                                                                            |
| LOC648210    | -1.54 | -1.14 XR_018923.1    | PREDICTED: similar to Heterogeneous nuclear ribonucleoprotein A1 (Helix-destabilizing protein) |
| NDUFB9       | -1.55 | -1.14 NM_005005.2    | NADH dehydrogenase (ubiquinone) 1 beta subcomplex                                              |
| CIP29        | -1.62 | -1.14 NM_033082.2    | cytokine induced protein 29 kDa (CIP29)                                                        |
| SFRS6        | -1.63 | -1.14 NM_006275.4    | splicing factor                                                                                |
| LOC645385    | -1.73 | -1.14 XM_928427.1    | PREDICTED: similar to heterogeneous nuclear ribonucleoprotein A1 (LOC645385)                   |
| NDUFA11      | -1.75 | -1.14 NM_175614.2    | NADH dehydrogenase (ubiquinone) 1 alpha subcomplex                                             |
| UXT          | -1.76 | -1.14 NM_004182.2    | ubiquitously-expressed transcript (UXT)                                                        |
| DDT          | -1.95 | -1.14 NM_001355.3    | D-dopachrome tautomerase (DDT)                                                                 |
| CIB1         | -1.96 | -1.14 NM_006384.2    | calcium and integrin binding 1 (calmyrin) (CIB1)                                               |
| CCDC72       | -2.12 | -1.14 NM_015933.3    | coiled-coil domain containing 72 (CCDC72)                                                      |
| LOC731096    | -2.12 | -1.14 XM_001129635.1 | PREDICTED: similar to Elongation factor 1-gamma (EF-1-gamma) (eEF-1B gamma) (LOC731096)        |
| LOC729926    | -2.13 | -1.14 XR_038426.1    | PREDICTED: misc_RNA (LOC729926)                                                                |
| LOC391075    | -2.15 | -1.14 XR_016557.2    | PREDICTED: misc_RNA (LOC391075)                                                                |
| RPL7A        | -2.28 | -1.14 NM_000972.2    | ribosomal protein L7a (RPL7A)                                                                  |
| LOC100132795 | -2.31 | -1.14 XR_037785.1    | PREDICTED: misc_RNA (LOC100132795)                                                             |
| LOC645138    | -2.33 | -1.14 XM_928168.1    | PREDICTED: similar to ribosomal protein S11 (LOC645138)                                        |
| LOC100132742 | -2.36 | -1.14 XM_001717156.1 | PREDICTED: hypothetical protein LOC100132742                                                   |

|              |       |                      |                                                                                                |
|--------------|-------|----------------------|------------------------------------------------------------------------------------------------|
| LOC646819    | -2.51 | -1.14 XR_017610.2    | PREDICTED: misc_RNA (LOC646819)                                                                |
| LOC729301    | -2.52 | -1.14 XR_038738.1    | PREDICTED: misc_RNA (LOC729301)                                                                |
| LOC100132795 | -2.65 | -1.14 XR_037619.1    | PREDICTED: misc_RNA (LOC100132795)                                                             |
| LOC728126    | -2.66 | -1.14 XR_036919.1    | PREDICTED: misc_RNA (LOC728126)                                                                |
| LOC728128    | -2.71 | -1.14 XR_015346.1    | PREDICTED: misc_RNA (LOC728128)                                                                |
| LOC728576    | -2.75 | -1.14 XR_038296.1    | PREDICTED: misc_RNA (LOC728576)                                                                |
| LOC728658    | -2.91 | -1.14 XM_939484.3    | PREDICTED: similar to 23 kD highly basic protein                                               |
| LOC654174    | -0.08 | -1.15 XM_940438.2    | PREDICTED: similar to lethal (2) k00619 CG4775-PA (LOC654174)                                  |
| TTC8         | -0.09 | -1.15 NM_144596.2    | tetratricopeptide repeat domain 8 (TTC8)                                                       |
| DHX40        | -0.1  | -1.15 NM_024612.3    | PREDICTED: DEAH (Asp-Glu-Ala-His) box polypeptide 40                                           |
| BP75         | -0.13 | -1.15 NR_002730.1    | bromodomain containing protein 75 kDa pseudogene (BP75) on chromosome 6.                       |
| HNRNPA3P1    | -0.18 | -1.15 NR_002726.1    | heterogeneous nuclear ribonucleoprotein A3 pseudogene 1 (HNRNPA3P1) on chromosome 10.          |
| ERP29        | -0.19 | -1.15 NM_006817.3    | endoplasmic reticulum protein 29 (ERP29)                                                       |
| LOC100132418 | -0.19 | -1.15 XM_001719607.1 | PREDICTED: similar to PRO1102 (LOC100132418)                                                   |
| PSMB8        | -0.19 | -1.15 NM_148919.3    | proteasome (prosome)                                                                           |
| CXorf40B     | -0.2  | -1.15 NM_001013845.1 | chromosome X open reading frame 40B (CXorf40B)                                                 |
| NAV1         | -0.2  | -1.15 NM_020443.2    | neuron navigator 1 (NAV1)                                                                      |
| CSTF3        | -0.22 | -1.15 NM_001033506.1 | cleavage stimulation factor                                                                    |
| TMED10       | -0.23 | -1.15 NM_006827.5    | transmembrane emp24-like trafficking protein 10 (yeast) (TMED10)                               |
| FOXC2        | -0.24 | -1.15 NM_005251.1    | forkhead box C2 (MFH-1)                                                                        |
| IDH1         | -0.26 | -1.15 NM_005896.2    | isocitrate dehydrogenase 1 (NADP+)                                                             |
| LOC650909    | -0.26 | -1.15 XM_939995.2    | PREDICTED: similar to activating signal cointegrator 1 complex subunit 3-like 1 (LOC650909)    |
| SCAMP1       | -0.26 | -1.15 NM_004866.4    | secretory carrier membrane protein 1 (SCAMP1)                                                  |
| ATG4D        | -0.28 | -1.15 NM_032885.4    | ATG4 autophagy related 4 homolog D ( <i>S. cerevisiae</i> ) (ATG4D)                            |
| PSEN2        | -0.29 | -1.15 NM_012486.1    | presenilin 2 (Alzheimer disease 4) (PSEN2)                                                     |
| LRRC49       | -0.31 | -1.15 NM_017691.2    | leucine rich repeat containing 49 (LRRC49)                                                     |
| TYW3         | -0.31 | -1.15 NM_138467.1    | tRNA-yW synthesizing protein 3 homolog ( <i>S. cerevisiae</i> ) (TYW3)                         |
| CKAP2L       | -0.36 | -1.15 NM_152515.2    | cytoskeleton associated protein 2-like (CKAP2L)                                                |
| NACC1        | -0.37 | -1.15 NM_052876.2    | nucleus accumbens associated 1                                                                 |
| SLC25A22     | -0.37 | -1.15 NM_024698.4    | solute carrier family 25 (mitochondrial carrier: glutamate)                                    |
| PLD3         | -0.38 | -1.15 NM_001031696.1 | phospholipase D family                                                                         |
| SLC15A4      | -0.44 | -1.15 NM_145648.1    | solute carrier family 15                                                                       |
| FARSA        | -0.49 | -1.15 NM_004461.2    | phenylalanyl-tRNA synthetase                                                                   |
| HNRNPU       | -0.6  | -1.15 NM_004501.3    | heterogeneous nuclear ribonucleoprotein U (scaffold attachment factor A) (HNRNPU)              |
| LRPPRC       | -0.6  | -1.15 NM_133259.2    | leucine-rich PPR-motif containing (LRPPRC)                                                     |
| SMOC1        | -0.63 | -1.15 NM_001034852.1 | SPARC related modular calcium binding 1 (SMOC1)                                                |
| ARL5A        | -0.66 | -1.15 NM_001037174.1 | ADP-ribosylation factor-like 5A (ARL5A)                                                        |
| PHF21A       | -0.77 | -1.15 NM_016621.2    | PHD finger protein 21A (PHF21A)                                                                |
| ERH          | -1.31 | -1.15 NM_004450.1    | enhancer of rudimentary homolog ( <i>Drosophila</i> ) (ERH)                                    |
| TRABD        | -1.43 | -1.15 NM_025204.2    | TraB domain containing (TRABD)                                                                 |
| C19orf56     | -1.5  | -1.15 NM_016145.2    | chromosome 19 open reading frame 56 (C19orf56)                                                 |
| DGUOK        | -1.51 | -1.15 NM_080918.1    | deoxyguanosine kinase (DGUOK)                                                                  |
| LOC645436    | -1.52 | -1.15 XM_928473.1    | PREDICTED: similar to Heterogeneous nuclear ribonucleoprotein A1 (Helix-destabilizing protein) |
| TPM1         | -1.56 | -1.15 NM_001018020.1 | tropomyosin 1 (alpha) (TPM1)                                                                   |
| LOC440991    | -1.67 | -1.15 XR_017665.2    | PREDICTED: misc_RNA (LOC440991)                                                                |
| FKSG30       | -1.72 | -1.15 NM_001017421.1 | actin-like protein (FKSG30)                                                                    |
| IMP3         | -1.85 | -1.15 NM_018285.2    | IMP3                                                                                           |
| NDUFB10      | -1.86 | -1.15 NM_004548.1    | NADH dehydrogenase (ubiquinone) 1 beta subcomplex                                              |
| SNRPF        | -1.86 | -1.15 NM_003095.1    | small nuclear ribonucleoprotein polypeptide F (SNRPF)                                          |

|                     |       |                      |                                                                                  |
|---------------------|-------|----------------------|----------------------------------------------------------------------------------|
| <b>GUK1</b>         | -1.96 | -1.15 NM_000858.4    | guanylate kinase 1 (GUK1)                                                        |
| <b>LOC729769</b>    | -1.99 | -1.15 XM_001131246.2 | PREDICTED: similar to Ubiquinol-cytochrome c reductase hinge protein (LOC729769) |
| <b>RHOA</b>         | -1.99 | -1.15 NM_001664.2    | ras homolog gene family                                                          |
| <b>TPI1</b>         | -2.04 | -1.15 NM_000365.4    | triosephosphate isomerase 1 (TPI1)                                               |
| <b>EEF2</b>         | -2.15 | -1.15 NM_001961.3    | eukaryotic translation elongation factor 2 (EEF2)                                |
| <b>LOC644914</b>    | -2.23 | -1.15 XM_001128558.2 | PREDICTED: similar to H3 histone                                                 |
| <b>YBX1</b>         | -2.24 | -1.15 NM_004559.3    | Y box binding protein 1 (YBX1)                                                   |
| <b>LOC653737</b>    | -2.29 | -1.15 XM_929340.3    | PREDICTED: hypothetical LOC653737 (LOC653737)                                    |
| <b>GNG11</b>        | -2.35 | -1.15 NM_004126.3    | guanine nucleotide binding protein (G protein)                                   |
| <b>ATP5G2</b>       | -2.39 | -1.15 NM_005176.4    | ATP synthase                                                                     |
| <b>LOC285053</b>    | -2.39 | -1.15 XM_208281.7    | PREDICTED: similar to ribosomal protein L18a                                     |
| <b>LOC286444</b>    | -2.51 | -1.15 XR_038693.1    | PREDICTED: misc_RNA (LOC286444)                                                  |
| <b>H3F3A</b>        | -2.55 | -1.15 NM_002107.3    | H3 histone                                                                       |
| <b>H3F3A</b>        | -2.6  | -1.15 NM_002107.3    | H3 histone                                                                       |
| <b>COX7C</b>        | -2.65 | -1.15 NM_001867.2    | cytochrome c oxidase subunit VIIc (COX7C)                                        |
| <b>LOC643863</b>    | -2.66 | -1.15 XR_016732.2    | PREDICTED: misc_RNA (LOC643863)                                                  |
| <b>RPL17</b>        | -2.75 | -1.15 NM_001035006.1 | ribosomal protein L17 (RPL17)                                                    |
| <b>LOC652071</b>    | -2.9  | -1.15 XM_941396.2    | PREDICTED: similar to 60S ribosomal protein L23a (LOC652071)                     |
| <b>LOC387930</b>    | -2.91 | -1.15 XR_041075.1    | PREDICTED: misc_RNA (LOC387930)                                                  |
| <b>LOC389101</b>    | -2.96 | -1.15 XM_001131315.1 | PREDICTED: similar to ribosomal protein L23a (LOC389101)                         |
| <b>LOC440589</b>    | -2.96 | -1.15 XM_942424.2    | PREDICTED: similar to ribosomal protein S2                                       |
| <b>LOC401206</b>    | -2.97 | -1.15 XM_376420.3    | PREDICTED: similar to 40S ribosomal protein S25 (LOC401206)                      |
| <b>LOC100129158</b> | -3.01 | -1.15 XR_038602.1    | PREDICTED: misc_RNA (LOC100129158)                                               |
| <b>LOC440027</b>    | -3.01 | -1.15 XR_017407.2    | PREDICTED: misc_RNA (LOC440027)                                                  |
| <b>TMSB4X</b>       | -3.23 | -1.15 NM_021109.2    | thymosin                                                                         |
| <b>SLC25A24</b>     | -0.16 | -1.16 NM_013386.3    | solute carrier family 25 (mitochondrial carrier; phosphate carrier)              |
| <b>GAS2L3</b>       | -0.24 | -1.16 NM_174942.1    | growth arrest-specific 2 like 3 (GAS2L3)                                         |
| <b>PANX1</b>        | -0.24 | -1.16 NM_015368.3    | pannexin 1 (PANX1)                                                               |
| <b>RSPH3</b>        | -0.26 | -1.16 NM_031924.3    | radial spoke 3 homolog (Chlamydomonas) (RSPH3)                                   |
| <b>BACE2</b>        | -0.28 | -1.16 NM_138991.1    | beta-site APP-cleaving enzyme 2 (BACE2)                                          |
| <b>MYPN</b>         | -0.3  | -1.16 NM_032578.2    | myopalladin (MYPN)                                                               |
| <b>PBRM1</b>        | -0.32 | -1.16 NM_181042.2    | polybromo 1 (PBRM1)                                                              |
| <b>ZNF365</b>       | -0.32 | -1.16 NM_014951.2    | zinc finger protein 365 (ZNF365)                                                 |
| <b>HIST1H2AG</b>    | -0.34 | -1.16 NM_021064.3    | histone cluster 1                                                                |
| <b>IER5L</b>        | -0.42 | -1.16 NM_203434.2    | immediate early response 5-like (IER5L)                                          |
| <b>C15orf48</b>     | -0.44 | -1.16 NM_032413.2    | chromosome 15 open reading frame 48 (C15orf48)                                   |
| <b>MSL3L1</b>       | -0.46 | -1.16 NM_078629.1    | male-specific lethal 3-like 1 (Drosophila) (MSL3L1)                              |
| <b>MVP</b>          | -0.47 | -1.16 NM_005115.3    | major vault protein (MVP)                                                        |
| <b>PTPRK</b>        | -0.52 | -1.16 NM_002844.2    | protein tyrosine phosphatase                                                     |
| <b>ABCB7</b>        | -0.54 | -1.16 NM_004299.3    | ATP-binding cassette                                                             |
| <b>IDS</b>          | -0.55 | -1.16 NM_006123.2    | iduronate 2-sulfatase (Hunter syndrome) (IDS)                                    |
| <b>LAMP2</b>        | -0.55 | -1.16 NM_002294.1    | lysosomal-associated membrane protein 2 (LAMP2)                                  |
| <b>ETF1</b>         | -0.98 | -1.16 NM_004730.1    | eukaryotic translation termination factor 1 (ETF1)                               |
| <b>HTRA1</b>        | -1.01 | -1.16 NM_002775.3    | HtrA serine peptidase 1 (HTRA1)                                                  |
| <b>UBL5</b>         | -1.51 | -1.16 NM_001048241.1 | ubiquitin-like 5 (UBL5)                                                          |
| <b>LOC643949</b>    | -1.58 | -1.16 XR_018645.1    | PREDICTED: similar to 60S acidic ribosomal protein P2 (LOC643949)                |
| <b>ATP6V0C</b>      | -1.65 | -1.16 XM_001130742.1 | PREDICTED: ATPase                                                                |
| <b>EDF1</b>         | -1.67 | -1.16 NM_003792.2    | endothelial differentiation-related factor 1 (EDF1)                              |
| <b>LOC100131609</b> | -1.74 | -1.16 XR_038433.1    | PREDICTED: misc_RNA (LOC100131609)                                               |

|              |       |                      |                                                                                   |
|--------------|-------|----------------------|-----------------------------------------------------------------------------------|
| LOC645157    | -1.77 | -1.16 XR_016770.2    | PREDICTED: misc_RNA (LOC645157)                                                   |
| ATP5G1       | -1.8  | -1.16 NM_001002027.1 | ATP synthase                                                                      |
| EIF3D        | -1.8  | -1.16 NM_003753.3    | eukaryotic translation initiation factor 3                                        |
| AMY1C        | -1.94 | -1.16 NM_001008219.1 | amylase                                                                           |
| LOC388621    | -2.07 | -1.16 XM_941195.2    | PREDICTED: similar to ribosomal protein L21 (LOC388621)                           |
| LOC728139    | -2.23 | -1.16 XR_015301.2    | PREDICTED: misc_RNA (LOC728139)                                                   |
| PRDX5        | -2.31 | -1.16 NM_181652.1    | peroxiredoxin 5 (PRDX5)                                                           |
| COX7A2       | -2.39 | -1.16 NM_001865.2    | cytochrome c oxidase subunit VIIa polypeptide 2 (liver) (COX7A2)                  |
| LOC648771    | -2.42 | -1.16 XR_039634.1    | PREDICTED: misc_RNA (LOC648771)                                                   |
| SLC25A3      | -2.44 | -1.16 NM_002635.2    | solute carrier family 25 (mitochondrial carrier; phosphate carrier)               |
| LOC387867    | -2.51 | -1.16 XM_939738.2    | PREDICTED: similar to 40S ribosomal protein SA (p40) (34/67 kDa laminin receptor) |
| LOC100132742 | -2.53 | -1.16 XM_001717161.1 | PREDICTED: hypothetical protein LOC100132742                                      |
| H3F3A        | -2.7  | -1.16 NM_002107.3    | H3 histone                                                                        |
| LOC643531    | -2.76 | -1.16 XR_019563.2    | PREDICTED: misc_RNA (LOC643531)                                                   |
| LOC653881    | -2.78 | -1.16 XM_001718435.1 | PREDICTED: similar to ribosomal protein L3 (LOC653881)                            |
| RPL8         | -2.78 | -1.16 NM_033301.1    | ribosomal protein L8 (RPL8)                                                       |
| PFN1         | -2.88 | -1.16 NM_005022.2    | profilin 1 (PFN1)                                                                 |
| LOC650276    | -2.94 | -1.16 XM_939363.1    | PREDICTED: similar to 60S ribosomal protein L7 (LOC650276)                        |
| LOC728481    | -3.02 | -1.16 XR_015292.1    | PREDICTED: similar to similar to RPL23AP7 protein (LOC728481)                     |
| RPS15A       | -3.05 | -1.16 NM_001030009.1 | ribosomal protein S15a (RPS15A)                                                   |
| MCM7         | -0.23 | -1.17 NM_005916.3    | minichromosome maintenance complex component 7 (MCM7)                             |
| WIPF1        | -0.25 | -1.17 NM_001077269.1 | WAS/WASL interacting protein family                                               |
| CAMK2D       | -0.28 | -1.17 NM_001221.2    | calcium/calmodulin-dependent protein kinase (CaM kinase) II delta (CAMK2D)        |
| LOC730996    | -0.3  | -1.17 XM_001128017.1 | PREDICTED: similar to chromosome 1 open reading frame 80 (LOC730996)              |
| DCBLD1       | -0.31 | -1.17 NM_173674.1    | discoidin                                                                         |
| GSTM4        | -0.31 | -1.17 NM_000850.3    | glutathione S-transferase M4 (GSTM4)                                              |
| PPIB         | -0.32 | -1.17 NM_000942.4    | peptidylprolyl isomerase B (cyclophilin B) (PPIB)                                 |
| FIGNL1       | -0.34 | -1.17 NM_001042762.1 | fidgetin-like 1 (FIGNL1)                                                          |
| LOC729985    | -0.37 | -1.17 XM_001131964.1 | PREDICTED: similar to CDC42-binding protein kinase beta (LOC729985)               |
| ABI1         | -0.45 | -1.17 NM_001012751.1 | abl-interactor 1 (ABI1)                                                           |
| C7orf68      | -0.46 | -1.17 NM_013332.3    | chromosome 7 open reading frame 68 (C7orf68)                                      |
| PUS3         | -0.52 | -1.17 NM_031307.2    | pseudouridylate synthase 3 (PUS3)                                                 |
| CYTH1        | -0.55 | -1.17 NM_017456.2    | cytohesin 1 (CYTH1)                                                               |
| DSN1         | -0.66 | -1.17 NM_024918.2    | DSN1                                                                              |
| HNRNPAB      | -1    | -1.17 NM_004499.3    | heterogeneous nuclear ribonucleoprotein A/B (HNRNPAB)                             |
| GSTO1        | -1.57 | -1.17 NM_004832.1    | glutathione S-transferase omega 1 (GSTO1)                                         |
| CD81         | -1.58 | -1.17 NM_004356.3    | CD81 molecule (CD81)                                                              |
| ERP29        | -1.62 | -1.17 NM_001034025.1 | endoplasmic reticulum protein 29 (ERP29)                                          |
| CSRP1        | -1.65 | -1.17 NM_004078.1    | cysteine and glycine-rich protein 1 (CSRP1)                                       |
| NDUFA3       | -1.76 | -1.17 NM_004542.2    | NADH dehydrogenase (ubiquinone) 1 alpha subcomplex                                |
| PFDN5        | -2.01 | -1.17 NM_002624.3    | prefoldin subunit 5 (PFDN5)                                                       |
| HNRPA1L-2    | -2.02 | -1.17 NR_002944.2    | heterogeneous nuclear ribonucleoprotein A1 pseudogene (HNRPA1L-2)                 |
| RPS21        | -2.13 | -1.17 NM_001024.3    | ribosomal protein S21 (RPS21)                                                     |
| NDUFS8       | -2.17 | -1.17 NM_002496.1    | NADH dehydrogenase (ubiquinone) Fe-S protein 8                                    |
| LOC439953    | -2.32 | -1.17 XR_017375.2    | PREDICTED: misc_RNA (LOC439953)                                                   |
| NOP10        | -2.37 | -1.17 NM_018648.3    | NOP10 ribonucleoprotein homolog (yeast) (NOP10)                                   |
| LOC338870    | -2.47 | -1.17 XR_038789.1    | PREDICTED: misc_RNA (LOC338870)                                                   |
| RPS18        | -2.55 | -1.17 NM_022551.2    | ribosomal protein S18 (RPS18)                                                     |
| LOC100129141 | -2.78 | -1.17 XR_039484.1    | PREDICTED: misc_RNA (LOC100129141)                                                |

|              |       |                      |                                                                                 |
|--------------|-------|----------------------|---------------------------------------------------------------------------------|
| LOC728576    | -2.92 | -1.17 XR_038296.1    | PREDICTED: misc_RNA (LOC728576)                                                 |
| LOC653232    | -2.97 | -1.17 XM_944104.2    | PREDICTED: hypothetical LOC653232                                               |
| ACTG1        | -2.99 | -1.17 NM_001614.2    | actin                                                                           |
| LOC402057    | -3.13 | -1.17 NM_001080499.1 | similar to 40S ribosomal protein S17 (LOC402057)                                |
| ADAM9        | -0.26 | -1.18 NM_003816.2    | ADAM metalloproteinase domain 9 (meltrin gamma) (ADAM9)                         |
| KCNN4        | -0.31 | -1.18 NM_002250.2    | potassium intermediate/small conductance calcium-activated channel              |
| TRIM56       | -0.34 | -1.18 NM_030961.1    | tripartite motif-containing 56 (TRIM56)                                         |
| LOX          | -0.36 | -1.18 NM_002317.3    | lysyl oxidase (LOX)                                                             |
| ST3GAL2      | -0.36 | -1.18 NM_006927.3    | ST3 beta-galactoside alpha-2                                                    |
| MCTP1        | -0.38 | -1.18 NM_024717.3    | multiple C2 domains                                                             |
| H2AFY        | -0.4  | -1.18 NM_138609.2    | H2A histone family                                                              |
| IFIT3        | -0.4  | -1.18 NM_001549.2    | interferon-induced protein with tetratricopeptide repeats 3 (IFIT3)             |
| WBSCR16      | -0.43 | -1.18 NM_030798.3    | Williams-Beuren syndrome chromosome region 16 (WBSCR16)                         |
| TPM4         | -0.51 | -1.18 NM_003290.1    | tropomyosin 4 (TPM4)                                                            |
| GUSB         | -0.53 | -1.18 NM_000181.2    | glucuronidase                                                                   |
| LAMB1        | -0.65 | -1.18 NM_002291.1    | laminin                                                                         |
| HLA-B        | -0.67 | -1.18 NM_005514.5    | major histocompatibility complex                                                |
| MT1G         | -0.68 | -1.18 NM_005950.1    | metallothionein 1G (MT1G)                                                       |
| LMNA         | -1.07 | -1.18 NM_005572.3    | lamin A/C (LMNA)                                                                |
| MTE          | -1.24 | -1.18 NM_175621.2    | metallothionein E (MTE)                                                         |
| RPL29        | -1.37 | -1.18 NM_000992.2    | ribosomal protein L29 (RPL29)                                                   |
| PRDX4        | -1.57 | -1.18 NM_006406.1    | peroxiredoxin 4 (PRDX4)                                                         |
| HSPD1        | -1.59 | -1.18 NM_002156.4    | heat shock 60kDa protein 1 (chaperonin) (HSPD1)                                 |
| LSM7         | -1.66 | -1.18 NM_016199.1    | LSM7 homolog                                                                    |
| PTBP1        | -1.67 | -1.18 NM_002819.3    | polypyrimidine tract binding protein 1 (PTBP1)                                  |
| LOC347376    | -1.75 | -1.18 XM_937928.1    | PREDICTED: similar to H3 histone                                                |
| LOC729500    | -1.8  | -1.18 XR_018655.2    | PREDICTED: misc_RNA (LOC729500)                                                 |
| NDUFA12      | -1.82 | -1.18 NM_018838.3    | NADH dehydrogenase (ubiquinone) 1 alpha subcomplex                              |
| PFDN5        | -1.82 | -1.18 NM_145897.2    | prefoldin subunit 5 (PFDN5)                                                     |
| CCT3         | -1.87 | -1.18 NM_005998.3    | chaperonin containing TCP1                                                      |
| ACTB         | -1.95 | -1.18 NM_001101.2    | actin                                                                           |
| LOC391532    | -2.03 | -1.18 XR_017653.1    | PREDICTED: misc_RNA (LOC391532)                                                 |
| PTBP1        | -2.04 | -1.18 NM_175847.1    | polypyrimidine tract binding protein 1 (PTBP1)                                  |
| NDUFB8       | -2.09 | -1.18 NM_005004.2    | NADH dehydrogenase (ubiquinone) 1 beta subcomplex                               |
| VIM          | -2.11 | -1.18 NM_003380.2    | vimentin (VIM)                                                                  |
| TXNDC17      | -2.16 | -1.18 NM_032731.3    | thioredoxin domain containing 17 (TXNDC17)                                      |
| ATP5J2       | -2.26 | -1.18 NM_004889.2    | ATP synthase                                                                    |
| LOC731640    | -2.26 | -1.18 XM_001133089.1 | PREDICTED: similar to 60S ribosomal protein L21                                 |
| PCBP2        | -2.31 | -1.18 NM_005016.3    | poly(rC) binding protein 2 (PCBP2)                                              |
| LOC100128936 | -2.33 | -1.18 XM_001721819.1 | PREDICTED: similar to ribosomal protein L10a (LOC100128936)                     |
| LOC730246    | -2.61 | -1.18 XR_016080.2    | PREDICTED: misc_RNA (LOC730246)                                                 |
| LOC646200    | -2.62 | -1.18 XM_930460.1    | PREDICTED: similar to 60S ribosomal protein L22 (Heparin binding protein HBp15) |
| LOC389404    | -2.68 | -1.18 XR_018133.2    | PREDICTED: misc_RNA (LOC389404)                                                 |
| RPL9         | -2.73 | -1.18 NM_001024921.2 | ribosomal protein L9 (RPL9)                                                     |
| LOC729798    | -2.77 | -1.18 XM_001722176.1 | PREDICTED: similar to ribosomal protein L23a (LOC729798)                        |
| OAZ1         | -2.78 | -1.18 NM_004152.2    | ornithine decarboxylase antizyme 1 (OAZ1)                                       |
| RPS14        | -3.04 | -1.18 NM_001025070.1 | ribosomal protein S14 (RPS14)                                                   |
| TPT1         | -3.07 | -1.18 NM_003295.1    | tumor protein                                                                   |
| LOC389435    | -3.15 | -1.18 NM_001089587.1 | hCG21078 (LOC389435)                                                            |

|              |       |                      |                                                                               |
|--------------|-------|----------------------|-------------------------------------------------------------------------------|
| RPL6         | -3.15 | -1.18 NM_001024662.1 | ribosomal protein L6 (RPL6)                                                   |
| LOC728517    | -3.19 | -1.18 XR_015303.2    | PREDICTED: misc_RNA (LOC728517)                                               |
| GTF2IP1      | -0.3  | -1.19 NR_002206.1    | general transcription factor II                                               |
| ZAK          | -0.37 | -1.19 NM_016653.2    | sterile alpha motif and leucine zipper containing kinase AZK (ZAK)            |
| KCNG1        | -0.42 | -1.19 NM_002237.3    | potassium voltage-gated channel                                               |
| LOC644684    | -0.44 | -1.19 XM_001715037.1 | PREDICTED: hypothetical LOC644684 (LOC644684)                                 |
| HM13         | -0.45 | -1.19 NM_178580.1    | histocompatibility (minor) 13 (HM13)                                          |
| LOC647150    | -0.46 | -1.19 XR_017449.2    | PREDICTED: misc_RNA (LOC647150)                                               |
| LOC143543    | -0.56 | -1.19 NR_002197.1    | RNA binding motif protein                                                     |
| ITGB1        | -0.77 | -1.19 NM_033669.1    | integrin                                                                      |
| SF3B5        | -1.53 | -1.19 NM_031287.2    | splicing factor 3b                                                            |
| LOC644745    | -1.58 | -1.19 XR_018757.1    | PREDICTED: misc_RNA (LOC644745)                                               |
| ATP1A1       | -1.66 | -1.19 NM_001001586.1 | ATPase                                                                        |
| NHP2         | -1.69 | -1.19 NM_001034833.1 | NHP2 ribonucleoprotein homolog (yeast) (NHP2)                                 |
| CCT7         | -1.76 | -1.19 NM_001009570.1 | chaperonin containing TCP1                                                    |
| WBP5         | -1.83 | -1.19 NM_001006612.1 | WW domain binding protein 5 (WBP5)                                            |
| LOC389156    | -1.85 | -1.19 XR_017589.2    | PREDICTED: misc_RNA (LOC389156)                                               |
| HNRPA1P4     | -2.09 | -1.19 XM_939887.2    | PREDICTED: heterogeneous nuclear ribonucleoprotein A1 pseudogene 4 (HNRPA1P4) |
| IFITM2       | -2.22 | -1.19 NM_006435.2    | interferon induced transmembrane protein 2 (1-8D) (IFITM2)                    |
| LOC645688    | -2.27 | -1.19 XR_017614.1    | PREDICTED: similar to 60S ribosomal protein L12 (LOC645688)                   |
| PARK7        | -2.44 | -1.19 NM_007262.3    | Parkinson disease (autosomal recessive)                                       |
| LOC731365    | -2.57 | -1.19 XR_015917.1    | PREDICTED: similar to ribosomal protein L24 (LOC731365)                       |
| MGC87895     | -2.58 | -1.19 XM_942712.3    | PREDICTED: similar to ribosomal protein S14 (MGC87895)                        |
| RPL14L       | -2.62 | -1.19 XR_041286.1    | PREDICTED: misc_RNA (RPL14L)                                                  |
| LOC651436    | -2.69 | -1.19 XM_940587.1    | PREDICTED: similar to ribosomal protein L9 (LOC651436)                        |
| LOC440575    | -2.74 | -1.19 XM_001732837.1 | PREDICTED: hypothetical LOC440575 (LOC440575)                                 |
| LOC642741    | -2.74 | -1.19 XR_019077.2    | PREDICTED: misc_RNA (LOC642741)                                               |
| LOC728244    | -2.74 | -1.19 XR_018431.1    | PREDICTED: misc_RNA (LOC728244)                                               |
| LOC731985    | -2.76 | -1.19 XR_015987.1    | PREDICTED: hypothetical protein LOC731985 (LOC731985)                         |
| LOC100131713 | -2.81 | -1.19 XM_001724272.1 | PREDICTED: similar to ribosomal protein L29                                   |
| LOC391656    | -2.81 | -1.19 XM_373027.4    | PREDICTED: similar to hCG1640454 (LOC391656)                                  |
| SNRPD2       | -2.86 | -1.19 NM_004597.4    | small nuclear ribonucleoprotein D2 polypeptide 16.5kDa (SNRPD2)               |
| UBB          | -2.95 | -1.19 NM_018955.2    | ubiquitin B (UBB)                                                             |
| LOC729617    | -3.02 | -1.19 NM_001101668.1 | ribosomal protein L23a-like (LOC729617)                                       |
| LOC100129553 | -3.03 | -1.19 XR_039577.1    | PREDICTED: misc_RNA (LOC100129553)                                            |
| LOC647099    | -3.12 | -1.19 NM_001093758.2 | similar to ribosomal protein L23A (LOC647099)                                 |
| RPL38        | -3.14 | -1.19 NM_001035258.1 | ribosomal protein L38 (RPL38)                                                 |
| LOC148430    | -3.16 | -1.19 XR_018751.2    | PREDICTED: misc_RNA (LOC148430)                                               |
| RPLP2        | -3.33 | -1.19 NM_001004.2    | ribosomal protein                                                             |
| LOC653162    | -3.34 | -1.19 XR_038820.1    | PREDICTED: misc_RNA (LOC653162)                                               |
| ANXA8        | -0.36 | -1.2 NM_001040084.1  | annexin A8 (ANXA8)                                                            |
| IL11         | -0.36 | -1.2 NM_000641.2     | interleukin 11 (IL11)                                                         |
| EID2         | -0.37 | -1.2 NM_153232.3     | EP300 interacting inhibitor of differentiation 2 (EID2)                       |
| STK16        | -0.37 | -1.2 NM_003691.2     | serine/threonine kinase 16 (STK16)                                            |
| GRN          | -0.49 | -1.2 NM_002087.2     | granulin (GRN)                                                                |
| PTBP2        | -0.85 | -1.2 NM_021190.1     | polypyrimidine tract binding protein 2 (PTBP2)                                |
| LOC645691    | -1.08 | -1.2 XM_928701.3     | PREDICTED: similar to heterogeneous nuclear ribonucleoprotein A1 (LOC645691)  |
| MAPKAPK3     | -1.39 | -1.2 NM_004635.3     | mitogen-activated protein kinase-activated protein kinase 3 (MAPKAPK3)        |
| MYH9         | -1.51 | -1.2 NM_002473.3     | myosin                                                                        |

|              |       |                      |                                                                                                |
|--------------|-------|----------------------|------------------------------------------------------------------------------------------------|
| CDH2         | -1.52 | -1.2 NM_001792.2     | cadherin 2                                                                                     |
| MRPL11       | -1.53 | -1.2 NM_170738.1     | mitochondrial ribosomal protein L11 (MRPL11)                                                   |
| CCT3         | -1.68 | -1.2 NM_001008800.1  | chaperonin containing TCP1                                                                     |
| LOC388275    | -1.8  | -1.2 XM_928429.1     | PREDICTED: similar to Heterogeneous nuclear ribonucleoprotein A1 (Helix-destabilizing protein) |
| LOC648210    | -1.98 | -1.2 XR_018923.1     | PREDICTED: similar to Heterogeneous nuclear ribonucleoprotein A1 (Helix-destabilizing protein) |
| LOC400948    | -2.02 | -1.2 XM_940643.1     | PREDICTED: similar to CG33774-PA (LOC400948)                                                   |
| LOC388532    | -2.19 | -1.2 XM_939726.2     | PREDICTED: similar to ribosomal protein L21 (LOC388532)                                        |
| MGC4677      | -2.24 | -1.2 NM_052871.3     | hypothetical protein MGC4677 (MGC4677)                                                         |
| LOC347544    | -2.26 | -1.2 XM_938382.2     | PREDICTED: similar to ribosomal protein L18a (LOC347544)                                       |
| LOC643433    | -2.53 | -1.2 XM_928197.1     | PREDICTED: similar to 60S ribosomal protein L29 (Cell surface heparin binding protein HIP)     |
| RPL13        | -2.54 | -1.2 NM_033251.1     | ribosomal protein L13 (RPL13)                                                                  |
| LOC100127993 | -2.64 | -1.2 XR_037873.1     | PREDICTED: misc_RNA (LOC100127993)                                                             |
| LOC402694    | -2.66 | -1.2 NM_001089590.1  | similar to ribosomal protein L15 (LOC402694)                                                   |
| LOC729679    | -2.71 | -1.2 XR_015990.2     | PREDICTED: misc_RNA (LOC729679)                                                                |
| LOC728782    | -2.73 | -1.2 XM_001720625.1  | PREDICTED: similar to ribosomal protein L21 (LOC728782)                                        |
| LOC390354    | -2.75 | -1.2 XR_000900.1     | PREDICTED: similar to ribosomal protein L18a; 60S ribosomal protein L18a                       |
| RPL23        | -2.94 | -1.2 NM_000978.3     | ribosomal protein L23 (RPL23)                                                                  |
| LOC642250    | -3.02 | -1.2 NM_001089592.1  | PREDICTED: similar to 60S ribosomal protein L17 (L23)                                          |
| LOC341457    | -3.09 | -1.2 XM_292085.2     | PREDICTED: similar to peptidylprolyl isomerase A isoform 1 (LOC341457)                         |
| LOC648729    | -3.12 | -1.2 XR_039144.1     | PREDICTED: misc_RNA (LOC648729)                                                                |
| LOC644464    | -3.25 | -1.2 XR_038490.1     | PREDICTED: misc_RNA (LOC644464)                                                                |
| RPS17        | -3.3  | -1.2 NM_001021.3     | ribosomal protein S17 (RPS17)                                                                  |
| LOC642210    | -3.33 | -1.2 XM_936874.1     | PREDICTED: similar to 60S ribosomal protein L32 (LOC642210)                                    |
| LOC649076    | -3.41 | -1.2 XR_018338.2     | PREDICTED: misc_RNA (LOC649076)                                                                |
| FSTL4        | -0.47 | -1.21 NM_015082.1    | folliculin-like 4 (FSTL4)                                                                      |
| FOXD1        | -0.48 | -1.21 NM_004472.2    | forkhead box D1 (FOXD1)                                                                        |
| LGALS8       | -0.48 | -1.21 NM_201545.1    | lectin                                                                                         |
| UBE2L6       | -0.51 | -1.21 NM_004223.3    | ubiquitin-conjugating enzyme E2L 6 (UBE2L6)                                                    |
| PPP2R5D      | -0.54 | -1.21 NM_180976.1    | protein phosphatase 2                                                                          |
| MAGEE1       | -0.59 | -1.21 NM_020932.1    | melanoma antigen family E                                                                      |
| HLA-G        | -0.6  | -1.21 NM_002127.3    | HLA-G histocompatibility antigen                                                               |
| WSB1         | -0.93 | -1.21 NM_134265.2    | WD repeat and SOCS box-containing 1 (WSB1)                                                     |
| NHP2L1       | -1.08 | -1.21 NM_001003796.1 | NHP2 non-histone chromosome protein 2-like 1 (S. cerevisiae) (NHP2L1)                          |
| MRPS35       | -1.25 | -1.21 NM_021821.2    | mitochondrial ribosomal protein S35 (MRPS35)                                                   |
| C19orf70     | -1.52 | -1.21 NM_205767.1    | chromosome 19 open reading frame 70 (C19orf70)                                                 |
| SF3A3        | -1.64 | -1.21 NM_006802.2    | splicing factor 3a                                                                             |
| PSMB5        | -1.75 | -1.21 NM_002797.2    | proteasome (prosome)                                                                           |
| SUMO2        | -1.76 | -1.21 NM_001005849.1 | SMT3 suppressor of mif two 3 homolog 2 (S. cerevisiae) (SUMO2)                                 |
| LOC389156    | -1.78 | -1.21 XR_019429.2    | PREDICTED: misc_RNA (LOC389156)                                                                |
| CDC20        | -1.83 | -1.21 NM_001255.2    | cell division cycle 20 homolog (S. cerevisiae) (CDC20)                                         |
| LOC644237    | -1.83 | -1.21 XR_039184.1    | PREDICTED: misc_RNA (LOC644237)                                                                |
| NARS         | -1.89 | -1.21 NM_004539.3    | asparaginyl-tRNA synthetase (NARS)                                                             |
| LOC729406    | -2.01 | -1.21 XR_037260.1    | PREDICTED: misc_RNA (LOC729406)                                                                |
| CD44         | -2.07 | -1.21 NM_001001391.1 | CD44 molecule (Indian blood group) (CD44)                                                      |
| GNPDA1       | -2.07 | -1.21 NM_005471.3    | glucosamine-6-phosphate deaminase 1 (GNPDA1)                                                   |
| CCDC34       | -2.1  | -1.21 NM_030771.1    | coiled-coil domain containing 34 (CCDC34)                                                      |
| NDUFB7       | -2.26 | -1.21 NM_004146.4    | NADH dehydrogenase (ubiquinone) 1 beta subcomplex                                              |
| EDF1         | -2.29 | -1.21 NM_003792.2    | endothelial differentiation-related factor 1 (EDF1)                                            |
| PSMB3        | -2.3  | -1.21 NM_002795.2    | proteasome (prosome)                                                                           |



|                     |       |                      |                                                                                   |
|---------------------|-------|----------------------|-----------------------------------------------------------------------------------|
| <b>COX6C</b>        | -2.33 | -1.21 NM_004374.2    | cytochrome c oxidase subunit VIc (COX6C)                                          |
| <b>NDUFA1</b>       | -2.54 | -1.21 NM_004541.2    | NADH dehydrogenase (ubiquinone) 1 alpha subcomplex                                |
| <b>VIM</b>          | -2.55 | -1.21 NM_003380.2    | vimentin (VIM)                                                                    |
| <b>LOC100133273</b> | -2.71 | -1.21 XR_039238.1    | PREDICTED: misc_RNA (LOC100133273)                                                |
| <b>RPS5</b>         | -2.82 | -1.21 NM_001009.3    | ribosomal protein S5 (RPS5)                                                       |
| <b>RPL12</b>        | -2.86 | -1.21 NM_000976.2    | ribosomal protein L12 (RPL12)                                                     |
| <b>LOC730754</b>    | -2.91 | -1.21 NM_001093779.2 | similar to ribosomal protein S18 (LOC730754)                                      |
| <b>LOC648294</b>    | -2.98 | -1.21 XR_018553.2    | PREDICTED: misc_RNA (LOC648294)                                                   |
| <b>UQCRQ</b>        | -2.99 | -1.21 NM_014402.4    | ubiquinol-cytochrome c reductase                                                  |
| <b>LOC644029</b>    | -3.1  | -1.21 XR_017397.1    | PREDICTED: similar to 60S ribosomal protein L7a (LOC644029)                       |
| <b>LOC441013</b>    | -3.11 | -1.21 XR_016299.2    | PREDICTED: misc_RNA (LOC441013)                                                   |
| <b>LOC100130980</b> | -3.34 | -1.21 XR_038930.1    | PREDICTED: misc_RNA (LOC100130980)                                                |
| <b>LOC388524</b>    | -3.38 | -1.21 NM_001005472.1 | ribosomal protein SA pseudogene (LOC388524) on chromosome 19.                     |
| <b>LOC732432</b>    | -0.41 | -1.22 XM_001724189.1 | PREDICTED: similar to Rho-associated                                              |
| <b>ABCG1</b>        | -0.54 | -1.22 NM_016818.2    | ATP-binding cassette                                                              |
| <b>LOC728059</b>    | -0.54 | -1.22 XR_015606.1    | PREDICTED: misc_RNA (LOC728059)                                                   |
| <b>MMACHC</b>       | -0.63 | -1.22 NM_015506.2    | methylnalonic aciduria (cobalamin deficiency) cblC type                           |
| <b>LOC100132805</b> | -0.68 | -1.22 XM_001719188.1 | PREDICTED: similar to predicted protein (LOC100132805)                            |
| <b>HLA-A29.1</b>    | -0.75 | -1.22 NM_001080840.1 | major histocompatibility complex class I HLA-A29.1 (HLA-A29.1)                    |
| <b>JUN</b>          | -0.78 | -1.22 NM_002228.3    | jun oncogene (JUN)                                                                |
| <b>BAT2D1</b>       | -0.81 | -1.22 NM_015172.3    | BAT2 domain containing 1 (BAT2D1)                                                 |
| <b>LOC650517</b>    | -1.02 | -1.22 XR_019109.1    | PREDICTED: hypothetical LOC650517 (LOC650517)                                     |
| <b>RTN3</b>         | -1.03 | -1.22 NM_006054.2    | reticulon 3 (RTN3)                                                                |
| <b>DCTN2</b>        | -1.52 | -1.22 NM_006400.3    | dynactin 2 (p50) (DCTN2)                                                          |
| <b>C7orf55</b>      | -1.54 | -1.22 NM_197964.3    | chromosome 7 open reading frame 55 (C7orf55)                                      |
| <b>LOC647307</b>    | -1.54 | -1.22 XR_039752.1    | PREDICTED: misc_RNA (LOC647307)                                                   |
| <b>PRDX2</b>        | -1.56 | -1.22 NM_181738.1    | peroxiredoxin 2 (PRDX2)                                                           |
| <b>LOC729317</b>    | -1.68 | -1.22 XM_001133585.1 | PREDICTED: similar to voltage-dependent anion channel 2 (LOC729317)               |
| <b>P4HB</b>         | -1.69 | -1.22 NM_000918.3    | prolyl 4-hydroxylase                                                              |
| <b>RPP21</b>        | -1.71 | -1.22 NM_024839.1    | ribonuclease P/MRP 21kDa subunit (RPP21)                                          |
| <b>MGC71993</b>     | -1.79 | -1.22 NM_001004333.2 | similar to DNA segment                                                            |
| <b>PTTG1IP</b>      | -1.8  | -1.22 NM_004339.2    | pituitary tumor-transforming 1 interacting protein (PTTG1IP)                      |
| <b>MGST3</b>        | -1.82 | -1.22 NM_004528.2    | microsomal glutathione S-transferase 3 (MGST3)                                    |
| <b>NENF</b>         | -1.93 | -1.22 NM_013349.3    | neuron derived neurotrophic factor (NENF)                                         |
| <b>ITGB1</b>        | -2.23 | -1.22 NM_002211.2    | integrin                                                                          |
| <b>C20orf24</b>     | -2.27 | -1.22 NM_018840.2    | chromosome 20 open reading frame 24 (C20orf24)                                    |
| <b>EIF3B</b>        | -2.33 | -1.22 NM_001037283.1 | eukaryotic translation initiation factor 3                                        |
| <b>MT1E</b>         | -2.34 | -1.22 NM_175617.3    | metallothionein 1E (functional) (MT1E)                                            |
| <b>LOC646942</b>    | -2.68 | -1.22 XR_016892.2    | PREDICTED: misc_RNA (LOC646942)                                                   |
| <b>FAU</b>          | -2.87 | -1.22 NM_001997.3    | Finkel-Biskis-Reilly murine sarcoma virus (FBR-MuSV) ubiquitously expressed (FAU) |
| <b>LOC729402</b>    | -3.12 | -1.22 XM_001721328.1 | PREDICTED: hypothetical LOC729402 (LOC729402)                                     |
| <b>RPL10A</b>       | -3.14 | -1.22 NM_007104.4    | ribosomal protein L10a (RPL10A)                                                   |
| <b>RPS25</b>        | -3.18 | -1.22 NM_001028.2    | ribosomal protein S25 (RPS25)                                                     |
| <b>RPL41</b>        | -3.59 | -1.22 NM_001035267.1 | ribosomal protein L41 (RPL41)                                                     |
| <b>LOC91561</b>     | -3.6  | -1.22 NM_001080822.1 | hCG1992539 (LOC91561)                                                             |
| <b>PMP22</b>        | -0.54 | -1.23 NM_153321.1    | peripheral myelin protein 22 (PMP22)                                              |
| <b>DFFB</b>         | -0.64 | -1.23 NM_004402.2    | DNA fragmentation factor                                                          |
| <b>ITGB1</b>        | -0.7  | -1.23 NM_033668.1    | integrin                                                                          |
| <b>ETV5</b>         | -0.76 | -1.23 NM_004454.1    | ets variant gene 5 (ets-related molecule) (ETV5)                                  |

|                     |       |       |                |                                                                                                        |
|---------------------|-------|-------|----------------|--------------------------------------------------------------------------------------------------------|
| <b>TDG</b>          | -0.99 | -1.23 | NM_003211.3    | thymine-DNA glycosylase (TDG)                                                                          |
| <b>SLPI</b>         | -1.14 | -1.23 | NM_003064.2    | secretory leukocyte peptidase inhibitor (SLPI)                                                         |
| <b>UNC84B</b>       | -1.18 | -1.23 | NM_015374.1    | unc-84 homolog B ( <i>C. elegans</i> ) (UNC84B)                                                        |
| <b>TOMM22</b>       | -1.57 | -1.23 | NM_020243.4    | translocase of outer mitochondrial membrane 22 homolog (yeast) (TOMM22)                                |
| <b>ITPR3</b>        | -1.6  | -1.23 | NM_002224.2    | inositol 1                                                                                             |
| <b>MARCKSL1</b>     | -1.74 | -1.23 | NM_023009.4    | MARCKS-like 1 (MARCKSL1)                                                                               |
| <b>SUPT16H</b>      | -1.82 | -1.23 | NM_007192.2    | suppressor of Ty 16 homolog ( <i>S. cerevisiae</i> ) (SUPT16H)                                         |
| <b>GSTO1</b>        | -2.08 | -1.23 | NM_004832.1    | glutathione S-transferase omega 1 (GSTO1)                                                              |
| <b>POLR2H</b>       | -2.08 | -1.23 | NM_006232.2    | polymerase (RNA) II (DNA directed) polypeptide H (POLR2H)                                              |
| <b>ANXA5</b>        | -2.1  | -1.23 | NM_001154.2    | annexin A5 (ANXA5)                                                                                     |
| <b>C9orf78</b>      | -2.1  | -1.23 | NM_016520.2    | chromosome 9 open reading frame 78 (C9orf78)                                                           |
| <b>ETF1</b>         | -2.13 | -1.23 | NM_004730.1    | eukaryotic translation termination factor 1 (ETF1)                                                     |
| <b>GLTSCR2</b>      | -2.17 | -1.23 | NM_015710.3    | glioma tumor suppressor candidate region gene 2 (GLTSCR2)                                              |
| <b>C12orf57</b>     | -2.24 | -1.23 | NM_138425.2    | chromosome 12 open reading frame 57 (C12orf57)                                                         |
| <b>PPP1R14B</b>     | -2.36 | -1.23 | NM_138689.2    | protein phosphatase 1                                                                                  |
| <b>ATP5J2</b>       | -2.49 | -1.23 | NM_001003714.1 | ATP synthase                                                                                           |
| <b>TGFB1</b>        | -2.73 | -1.23 | NM_000358.1    | transforming growth factor                                                                             |
| <b>LOC391370</b>    | -3.05 | -1.23 | XM_372926.5    | PREDICTED: similar to hCG1818387 (LOC391370)                                                           |
| <b>RPS15A</b>       | -3.21 | -1.23 | NM_001019.4    | ribosomal protein S15a (RPS15A)                                                                        |
| <b>GNB2L1</b>       | -3.4  | -1.23 | NM_006098.4    | guanine nucleotide binding protein (G protein)                                                         |
| <b>LOC343184</b>    | -3.42 | -1.23 | XR_016832.1    | PREDICTED: misc_RNA (LOC343184)                                                                        |
| <b>SNAP25</b>       | -0.74 | -1.24 | NM_130811.1    | synaptosomal-associated protein                                                                        |
| <b>IGSF3</b>        | -0.87 | -1.24 | NM_001542.2    | immunoglobulin superfamily                                                                             |
| <b>CYFIP2</b>       | -0.95 | -1.24 | NM_014376.2    | cytoplasmic FMR1 interacting protein 2 (CYFIP2)                                                        |
| <b>GNL3L</b>        | -1.02 | -1.24 | NM_019067.4    | guanine nucleotide binding protein-like 3 (nucleolar)-like (GNL3L)                                     |
| <b>MYLIP</b>        | -1.25 | -1.24 | NM_013262.3    | myosin regulatory light chain interacting protein (MYLIP)                                              |
| <b>IGFBP7</b>       | -1.53 | -1.24 | NM_001553.1    | insulin-like growth factor binding protein 7 (IGFBP7)                                                  |
| <b>RNASEK</b>       | -1.75 | -1.24 | NM_001004333.3 | ribonuclease                                                                                           |
| <b>LOC100131801</b> | -1.95 | -1.24 | XM_001726504.1 | PREDICTED: similar to hCG2036585 (LOC100131801)                                                        |
| <b>URM1</b>         | -1.97 | -1.24 | NM_030914.1    | ubiquitin related modifier 1 homolog ( <i>S. cerevisiae</i> ) (URM1)                                   |
| <b>PEBP1</b>        | -1.98 | -1.24 | NM_002567.2    | phosphatidylethanolamine binding protein 1 (PEBP1)                                                     |
| <b>LOC100133372</b> | -1.99 | -1.24 | XR_039042.1    | PREDICTED: misc_RNA (LOC100133372)                                                                     |
| <b>ATPIF1</b>       | -2.18 | -1.24 | NM_178191.1    | ATPase inhibitory factor 1 (ATPIF1)                                                                    |
| <b>PTTG1</b>        | -2.5  | -1.24 | NM_004219.2    | pituitary tumor-transforming 1 (PTTG1)                                                                 |
| <b>SERF2</b>        | -2.74 | -1.24 | NM_001018108.2 | small EDRK-rich factor 2 (SERF2)                                                                       |
| <b>CLPTM1L</b>      | -2.86 | -1.24 | NM_030782.3    | CLPTM1-like (CLPTM1L)                                                                                  |
| <b>LOC649447</b>    | -2.86 | -1.24 | XM_941125.1    | PREDICTED: similar to 60S ribosomal protein L29 (Cell surface heparin binding protein HIP) (LOC649447) |
| <b>LOC729102</b>    | -2.87 | -1.24 | XR_015895.2    | PREDICTED: misc_RNA (LOC729102)                                                                        |
| <b>RPL12</b>        | -2.93 | -1.24 | NM_000976.2    | ribosomal protein L12 (RPL12)                                                                          |
| <b>LOC651894</b>    | -3.34 | -1.24 | XM_941155.2    | PREDICTED: similar to ribosomal protein S12 (LOC651894)                                                |
| <b>LOC100130553</b> | -3.35 | -1.24 | XM_001713658.1 | PREDICTED: hypothetical protein LOC100130553 (LOC100130553)                                            |
| <b>RPL11</b>        | -3.39 | -1.24 | NM_000975.2    | ribosomal protein L11 (RPL11)                                                                          |
| <b>RPS10</b>        | -3.41 | -1.24 | NM_001014.3    | ribosomal protein S10 (RPS10)                                                                          |
| <b>LOC388474</b>    | -3.72 | -1.24 | XM_938181.2    | PREDICTED: similar to 60S ribosomal protein L7a                                                        |
| <b>EXT2</b>         | -0.66 | -1.25 | NM_000401.2    | exostoses (multiple) 2 (EXT2)                                                                          |
| <b>ARL5A</b>        | -0.67 | -1.25 | NM_012097.3    | ADP-ribosylation factor-like 5A (ARL5A)                                                                |
| <b>CDCP1</b>        | -0.67 | -1.25 | NM_178181.1    | CUB domain containing protein 1 (CDCP1)                                                                |
| <b>STT3A</b>        | -0.75 | -1.25 | NM_152713.2    | STT3                                                                                                   |
| <b>SEMA3E</b>       | -1.45 | -1.25 | NM_012431.1    | sema domain                                                                                            |

|              |       |                      |                                                                                                 |
|--------------|-------|----------------------|-------------------------------------------------------------------------------------------------|
| ACTG1        | -1.57 | -1.25 NM_001614.2    | actin                                                                                           |
| FAM96B       | -1.6  | -1.25 NM_016062.1    | family with sequence similarity 96                                                              |
| LOC286512    | -1.66 | -1.25 XR_038196.1    | PREDICTED: misc_RNA (LOC286512)                                                                 |
| CTNNA1       | -1.78 | -1.25 NM_001903.2    | catenin (cadherin-associated protein)                                                           |
| LOC731049    | -1.81 | -1.25 XM_001129232.1 | PREDICTED: similar to Ubiquitin-conjugating enzyme E2S (Ubiquitin-conjugating enzyme E2-24 kDa) |
| S100A13      | -1.81 | -1.25 NM_001024211.1 | S100 calcium binding protein A13 (S100A13)                                                      |
| C7orf59      | -1.85 | -1.25 NM_001008395.2 | chromosome 7 open reading frame 59 (C7orf59)                                                    |
| LOC286016    | -2.02 | -1.25 NR_002187.2    | triosephosphate isomerase 1 pseudogene (LOC286016)                                              |
| LOC148430    | -2.13 | -1.25 XR_038750.1    | PREDICTED: misc_RNA (LOC148430)                                                                 |
| FBL          | -2.18 | -1.25 NM_001436.2    | fibrillarin (FBL)                                                                               |
| TSPO         | -2.55 | -1.25 NM_000714.4    | translocator protein (18kDa) (TSPO)                                                             |
| RAC1         | -2.6  | -1.25 NM_006908.3    | ras-related C3 botulinum toxin substrate 1 (rho family                                          |
| RPL36        | -2.6  | -1.25 NM_033643.2    | ribosomal protein L36 (RPL36)                                                                   |
| LOC644907    | -2.71 | -1.25 NM_001090027.1 | hCG18290 (LOC644907)                                                                            |
| TPM2         | -2.77 | -1.25 NM_213674.1    | tropomyosin 2 (beta) (TPM2)                                                                     |
| GAPDH        | -2.95 | -1.25 NM_002046.3    | glyceraldehyde-3-phosphate dehydrogenase (GAPDH)                                                |
| LOC728693    | -2.95 | -1.25 XR_015773.2    | PREDICTED: misc_RNA (LOC728693)                                                                 |
| LOC649548    | -3.2  | -1.25 XM_938623.1    | PREDICTED: similar to 60S ribosomal protein L32 (LOC649548)                                     |
| RPL27        | -3.36 | -1.25 NM_000988.3    | ribosomal protein L27 (RPL27)                                                                   |
| LACTB        | -0.73 | -1.26 NM_171846.1    | lactamase                                                                                       |
| CA9          | -0.86 | -1.26 NM_001216.1    | carbonic anhydrase IX (CA9)                                                                     |
| ESYT1        | -1.06 | -1.26 NM_015292.1    | extended synaptotagmin-like protein 1 (ESYT1)                                                   |
| FBLN1        | -1.33 | -1.26 NM_001996.2    | fibulin 1 (FBLN1)                                                                               |
| HLA-H        | -1.46 | -1.26 NR_001434.1    | major histocompatibility complex                                                                |
| EIF6         | -1.71 | -1.26 NM_181466.1    | eukaryotic translation initiation factor 6 (EIF6)                                               |
| LOC651816    | -1.75 | -1.26 XM_941060.1    | PREDICTED: similar to Ubiquitin-conjugating enzyme E2S (Ubiquitin-conjugating enzyme E2-24 kDa) |
| MSRB2        | -1.86 | -1.26 NM_012228.2    | methionine sulfoxide reductase B2 (MSRB2)                                                       |
| CAPZA2       | -1.88 | -1.26 NM_006136.2    | capping protein (actin filament) muscle Z-line                                                  |
| DDB1         | -2.15 | -1.26 NM_001923.3    | PREDICTED: damage-specific DNA binding protein 1                                                |
| YWHAB        | -2.44 | -1.26 NM_139323.2    | tyrosine 3-monooxygenase/tryptophan 5-monooxygenase activation protein                          |
| LOC100128731 | -2.45 | -1.26 NM_001134693.1 | dolichyl-diphosphooligosaccharide--protein glycosyltransferase subunit 4 (LOC100128731)         |
| NDUFB11      | -2.47 | -1.26 NM_019056.3    | NADH dehydrogenase (ubiquinone) 1 beta subcomplex                                               |
| ATP5L        | -2.76 | -1.26 NM_006476.4    | ATP synthase                                                                                    |
| RPS14        | -3.06 | -1.26 NM_001025071.1 | ribosomal protein S14 (RPS14)                                                                   |
| LOC645174    | -3.13 | -1.26 XR_017157.2    | PREDICTED: misc_RNA (LOC645174)                                                                 |
| LOC730187    | -3.13 | -1.26 XR_042419.1    | PREDICTED: misc_RNA (LOC730187)                                                                 |
| RPS20        | -3.21 | -1.26 NM_001023.2    | ribosomal protein S20 (RPS20)                                                                   |
| MYL6         | -3.28 | -1.26 NM_021019.3    | myosin                                                                                          |
| RPS11        | -3.29 | -1.26 NM_001015.3    | ribosomal protein S11 (RPS11)                                                                   |
| RPL27A       | -3.45 | -1.26 NM_000990.2    | ribosomal protein L27a (RPL27A)                                                                 |
| RPL18A       | -3.49 | -1.26 NM_000980.2    | ribosomal protein L18a (RPL18A)                                                                 |
| RPS19        | -3.49 | -1.26 NM_001022.3    | ribosomal protein S19 (RPS19)                                                                   |
| LOC644615    | -0.81 | -1.27 XM_927730.1    | PREDICTED: similar to Ras-related protein Rab-13 (LOC644615)                                    |
| LAMB3        | -0.86 | -1.27 NM_000228.2    | laminin                                                                                         |
| RAD21        | -0.86 | -1.27 NM_006265.1    | RAD21 homolog (S. pombe) (RAD21)                                                                |
| RAD54L2      | -0.87 | -1.27 NM_015106.2    | RAD54-like 2 (S. cerevisiae) (RAD54L2)                                                          |
| ZSWIM4       | -1.07 | -1.27 NM_023072.1    | zinc finger                                                                                     |
| TGM2         | -1.09 | -1.27 NM_004613.2    | transglutaminase 2 (C polypeptide                                                               |
| TPD52L2      | -1.12 | -1.27 NM_199361.1    | tumor protein D52-like 2 (TPD52L2)                                                              |

|              |       |       |                |                                                                                                |
|--------------|-------|-------|----------------|------------------------------------------------------------------------------------------------|
| HLA-F        | -1.25 | -1.27 | NM_018950.1    | major histocompatibility complex                                                               |
| C20orf127    | -1.63 | -1.27 | NM_080757.1    | chromosome 20 open reading frame 127 (C20orf127)                                               |
| ATP6AP1      | -1.64 | -1.27 | NM_001183.4    | ATPase                                                                                         |
| C9orf169     | -1.64 | -1.27 | NM_199001.1    | chromosome 9 open reading frame 169 (C9orf169)                                                 |
| DYNLT1       | -1.71 | -1.27 | NM_006519.1    | dynein                                                                                         |
| RAD23A       | -1.9  | -1.27 | NM_005053.2    | RAD23 homolog A (S. cerevisiae) (RAD23A)                                                       |
| NET1         | -1.93 | -1.27 | NM_001047160.1 | neuroepithelial cell transforming 1 (NET1)                                                     |
| TIMP1        | -1.93 | -1.27 | NM_003254.2    | TIMP metalloproteinase inhibitor 1 (TIMP1)                                                     |
| UBE2M        | -1.93 | -1.27 | NM_003969.3    | ubiquitin-conjugating enzyme E2M (UBC12 homolog)                                               |
| IMPDH2       | -2.2  | -1.27 | NM_000884.2    | IMP (inosine monophosphate) dehydrogenase 2 (IMPDH2)                                           |
| KRTCAP2      | -2.27 | -1.27 | NM_173852.3    | keratinocyte associated protein 2 (KRTCAP2)                                                    |
| CRIP1        | -2.6  | -1.27 | NM_001311.3    | cysteine-rich protein 1 (intestinal) (CRIP1)                                                   |
| GAPDH        | -2.77 | -1.27 | NM_002046.3    | glyceraldehyde-3-phosphate dehydrogenase (GAPDH)                                               |
| GSTP1        | -3.01 | -1.27 | NM_000852.2    | glutathione S-transferase pi (GSTP1)                                                           |
| NEDD8        | -3.01 | -1.27 | NM_006156.1    | neural precursor cell expressed                                                                |
| RPL18A       | -3.46 | -1.27 | NM_000980.2    | ribosomal protein L18a (RPL18A)                                                                |
| LOC441034    | -3.74 | -1.27 | XR_018917.1    | PREDICTED: similar to 60S ribosomal protein L7a (LOC441034)                                    |
| CCDC58       | -0.93 | -1.28 | NM_001017928.2 | coiled-coil domain containing 58 (CCDC58)                                                      |
| UBE1         | -1.58 | -1.28 | NM_003334.2    | ubiquitin-activating enzyme E1 (UBE1)                                                          |
| EEF1D        | -1.87 | -1.28 | NM_032378.2    | eukaryotic translation elongation factor 1 delta (guanine nucleotide exchange protein) (EEF1D) |
| PPM1G        | -2.45 | -1.28 | NM_002707.3    | protein phosphatase 1G (formerly 2C)                                                           |
| LOC653079    | -2.6  | -1.28 | XR_016115.2    | PREDICTED: misc_RNA (LOC653079)                                                                |
| TCEB2        | -2.81 | -1.28 | NM_007108.2    | transcription elongation factor B (SIII)                                                       |
| COX4I1       | -3.11 | -1.28 | NM_001861.2    | cytochrome c oxidase subunit IV isoform 1 (COX4I1)                                             |
| GAPDH        | -3.28 | -1.28 | NM_002046.3    | glyceraldehyde-3-phosphate dehydrogenase (GAPDH)                                               |
| LOC401019    | -3.43 | -1.28 | NM_001080831.1 | hCG1783417 (LOC401019)                                                                         |
| MYL6         | -3.45 | -1.28 | NM_021019.3    | myosin                                                                                         |
| RPL11        | -3.52 | -1.28 | NM_000975.2    | ribosomal protein L11 (RPL11)                                                                  |
| RPL37A       | -3.58 | -1.28 | NM_000998.4    | ribosomal protein L37a (RPL37A)                                                                |
| LARP1B       | -0.95 | -1.29 | NM_032239.2    | La ribonucleoprotein domain family                                                             |
| ACTN1        | -1.51 | -1.29 | NM_001102.2    | actinin                                                                                        |
| TRAPPC3      | -1.67 | -1.29 | NM_014408.3    | trafficking protein particle complex 3 (TRAPPC3)                                               |
| TDP1         | -1.97 | -1.29 | NM_018319.3    | tyrosyl-DNA phosphodiesterase 1 (TDP1)                                                         |
| LOC728782    | -2.42 | -1.29 | XM_001128906.2 | PREDICTED: similar to ribosomal protein L21 (LOC728782)                                        |
| LOC440055    | -2.53 | -1.29 | XM_495885.3    | PREDICTED: similar to ribosomal protein S12 (LOC440055)                                        |
| LOC648210    | -2.54 | -1.29 | XR_018923.1    | PREDICTED: similar to Heterogeneous nuclear ribonucleoprotein A1 (Helix-destabilizing protein) |
| RPS9         | -2.67 | -1.29 | NM_001013.3    | ribosomal protein S9 (RPS9)                                                                    |
| LOC100132564 | -2.76 | -1.29 | XM_001713808.1 | PREDICTED: hypothetical protein LOC100132564 (LOC100132564)                                    |
| LOC440737    | -3.05 | -1.29 | XM_496446.3    | PREDICTED: similar to 60S ribosomal protein L35 (LOC440737)                                    |
| LOC729742    | -3.07 | -1.29 | XM_001722353.1 | PREDICTED: similar to hCG1812832 (LOC729742)                                                   |
| RPS15        | -3.3  | -1.29 | NM_001018.3    | ribosomal protein S15 (RPS15)                                                                  |
| RPS12        | -3.62 | -1.29 | NM_001016.3    | ribosomal protein S12 (RPS12)                                                                  |
| RPL32        | -3.66 | -1.29 | NM_001007074.1 | ribosomal protein L32 (RPL32)                                                                  |
| ATAD1        | -1.12 | -1.3  | NM_032810.2    | ATPase family                                                                                  |
| NBPF10       | -1.13 | -1.3  | NM_001039703.1 | PREDICTED: neuroblastoma breakpoint family                                                     |
| GOT2         | -1.7  | -1.3  | NM_002080.2    | glutamic-oxaloacetic transaminase 2                                                            |
| LOC441743    | -1.71 | -1.3  | NM_001045548.1 | similar to C367G8.3 (novel protein similar to RPL23A (60S ribosomal protein L23A)) (LOC441743) |
| PLOD1        | -1.73 | -1.3  | NM_000302.2    | procollagen-lysine 1                                                                           |
| LOC149501    | -1.79 | -1.3  | XR_017100.2    | PREDICTED: misc_RNA (LOC149501)                                                                |

|                     |       |                      |                                                                                                |
|---------------------|-------|----------------------|------------------------------------------------------------------------------------------------|
| <b>FAM160B1</b>     | -1.83 | -1.3 NM_020940.3     | family with sequence similarity 160                                                            |
| <b>BOLA2</b>        | -1.85 | -1.3 NM_001031827.1  | bolA homolog 2 (E. coli) (BOLA2)                                                               |
| <b>KRT8</b>         | -1.91 | -1.3 NM_002273.2     | keratin 8 (KRT8)                                                                               |
| <b>CUTA</b>         | -2.4  | -1.3 NM_001014838.1  | cutA divalent cation tolerance homolog (E. coli) (CUTA)                                        |
| <b>RN7SK</b>        | -2.45 | -1.3 NR_001445.1     | RNA                                                                                            |
| <b>MT1A</b>         | -2.84 | -1.3 NM_005946.2     | metallothionein 1A (MT1A)                                                                      |
| <b>NDUFS5</b>       | -3.04 | -1.3 NM_004552.1     | NADH dehydrogenase (ubiquinone) Fe-S protein 5                                                 |
| <b>LOC388556</b>    | -3.05 | -1.3 XR_039451.1     | PREDICTED: misc_RNA (LOC388556)                                                                |
| <b>C20orf24</b>     | -3.11 | -1.3 NM_199483.1     | chromosome 20 open reading frame 24 (C20orf24)                                                 |
| <b>LOC729789</b>    | -3.3  | -1.3 XM_001722736.1  | PREDICTED: similar to insulinoma protein (rig) (LOC729789)                                     |
| <b>S100A6</b>       | -3.47 | -1.3 NM_014624.3     | S100 calcium binding protein A6 (S100A6)                                                       |
| <b>LOC440733</b>    | -3.52 | -1.3 XM_496442.3     | PREDICTED: similar to 40S ribosomal protein S15 (RIG protein) (LOC440733)                      |
| <b>DVL3</b>         | -1.08 | -1.31 NM_004423.3    | dishevelled                                                                                    |
| <b>SRD5A1</b>       | -1.58 | -1.31 NM_001047.2    | steroid-5-alpha-reductase                                                                      |
| <b>RPUSD4</b>       | -1.81 | -1.31 NM_032795.1    | RNA pseudouridylate synthase domain containing 4 (RPUSD4)                                      |
| <b>ARMET</b>        | -1.95 | -1.31 NM_006010.2    | arginine-rich                                                                                  |
| <b>ANAPC11</b>      | -2.18 | -1.31 NM_001002246.1 | PREDICTED: APC11 anaphase promoting complex subunit 11 homolog (yeast)                         |
| <b>C19orf53</b>     | -2.31 | -1.31 NM_014047.2    | chromosome 19 open reading frame 53 (C19orf53)                                                 |
| <b>RPL21</b>        | -2.83 | -1.31 NM_000982.3    | ribosomal protein L21 (RPL21)                                                                  |
| <b>CD44</b>         | -1.13 | -1.32 NM_001001392.1 | CD44 molecule (Indian blood group) (CD44)                                                      |
| <b>CIRBP</b>        | -1.55 | -1.32 NM_001280.1    | cold inducible RNA binding protein (CIRBP)                                                     |
| <b>ACTR1A</b>       | -1.61 | -1.32 NM_005736.2    | ARP1 actin-related protein 1 homolog A                                                         |
| <b>LOC644743</b>    | -1.97 | -1.32 XR_016703.1    | PREDICTED: hypothetical LOC644743 (LOC644743)                                                  |
| <b>UBA1</b>         | -1.99 | -1.32 NM_003334.3    | ubiquitin-like modifier activating enzyme 1 (UBA1)                                             |
| <b>BCAP31</b>       | -2.07 | -1.32 NM_005745.6    | B-cell receptor-associated protein 31 (BCAP31)                                                 |
| <b>LOC100130562</b> | -2.15 | -1.32 XM_001720379.1 | PREDICTED: hypothetical protein LOC100130562                                                   |
| <b>LOC401115</b>    | -2.64 | -1.32 XM_937968.2    | PREDICTED: hypothetical gene supported by BC038466; BC062790 (LOC401115)                       |
| <b>C20orf24</b>     | -3.14 | -1.32 NM_018840.2    | chromosome 20 open reading frame 24 (C20orf24)                                                 |
| <b>LOC642357</b>    | -3.28 | -1.32 XR_018361.2    | PREDICTED: misc_RNA (LOC642357)                                                                |
| <b>HSP90AB6P</b>    | -1.04 | -1.33 NM_001014441.1 | heat shock protein 90kDa alpha (cytosolic)                                                     |
| <b>BGN</b>          | -1.1  | -1.33 NM_001711.3    | biglycan (BGN)                                                                                 |
| <b>NUCKS1</b>       | -1.21 | -1.33 NM_022731.2    | nuclear casein kinase and cyclin-dependent kinase substrate 1 (NUCKS1)                         |
| <b>KIF3B</b>        | -1.55 | -1.33 NM_004798.2    | kinesin family member 3B (KIF3B)                                                               |
| <b>PMPCA</b>        | -1.71 | -1.33 NM_015160.1    | peptidase (mitochondrial processing) alpha (PMPCA)                                             |
| <b>KRT17</b>        | -2.63 | -1.33 NM_000422.1    | keratin 17 (KRT17)                                                                             |
| <b>MT2A</b>         | -2.93 | -1.33 NM_005953.2    | metallothionein 2A (MT2A)                                                                      |
| <b>LOC651894</b>    | -3.06 | -1.33 XM_941155.2    | PREDICTED: similar to ribosomal protein S12 (LOC651894)                                        |
| <b>MIF</b>          | -3.2  | -1.33 NM_002415.1    | macrophage migration inhibitory factor (glycosylation-inhibiting factor) (MIF)                 |
| <b>LOC653658</b>    | -3.49 | -1.33 XM_939687.2    | PREDICTED: similar to ribosomal protein S23 (LOC653658)                                        |
| <b>C9orf114</b>     | -1.5  | -1.34 NM_016390.2    | chromosome 9 open reading frame 114 (C9orf114)                                                 |
| <b>RTN3</b>         | -1.98 | -1.34 NM_201430.1    | reticulon 3 (RTN3)                                                                             |
| <b>TIMM22</b>       | -1.99 | -1.34 NM_013337.2    | translocase of inner mitochondrial membrane 22 homolog (yeast) (TIMM22)                        |
| <b>CS</b>           | -2.47 | -1.34 NM_004077.2    | citrate synthase (CS)                                                                          |
| <b>EEF1D</b>        | -2.51 | -1.34 NM_032378.2    | eukaryotic translation elongation factor 1 delta (guanine nucleotide exchange protein) (EEF1D) |
| <b>PHGDH</b>        | -2.57 | -1.34 NM_006623.2    | phosphoglycerate dehydrogenase (PHGDH)                                                         |
| <b>ARL5A</b>        | -2.78 | -1.34 NM_001037174.1 | ADP-ribosylation factor-like 5A (ARL5A)                                                        |
| <b>RPS9</b>         | -3.15 | -1.34 NM_001013.3    | ribosomal protein S9 (RPS9)                                                                    |
| <b>ENO1</b>         | -3.28 | -1.34 NM_001428.2    | enolase 1                                                                                      |
| <b>HIST1H4C</b>     | -3.52 | -1.34 NM_003542.3    | histone cluster 1                                                                              |

|                     |       |                      |                                                                                  |
|---------------------|-------|----------------------|----------------------------------------------------------------------------------|
| <b>LOC646766</b>    | -3.6  | -1.34 XR_017605.1    | PREDICTED: similar to 60S ribosomal protein L35 (LOC646766)                      |
| <b>RPL18A</b>       | -3.81 | -1.34 NM_000980.2    | ribosomal protein L18a (RPL18A)                                                  |
| <b>LOC729903</b>    | -3.91 | -1.34 XR_040892.1    | PREDICTED: misc_RNA (LOC729903)                                                  |
| <b>MT1X</b>         | -1.82 | -1.35 NM_005952.2    | metallothionein 1X (MT1X)                                                        |
| <b>HMGB2</b>        | -1.87 | -1.35 NM_002129.2    | high-mobility group box 2 (HMGB2)                                                |
| <b>NAP1L4</b>       | -1.99 | -1.35 NM_005969.3    | nucleosome assembly protein 1-like 4 (NAP1L4)                                    |
| <b>TFG</b>          | -2.04 | -1.35 NM_001007565.1 | TRK-fused gene (TFG)                                                             |
| <b>BOLA2</b>        | -2.58 | -1.35 NM_001031827.1 | bolA homolog 2 (E. coli) (BOLA2)                                                 |
| <b>MRPS24</b>       | -2.78 | -1.35 NM_032014.2    | mitochondrial ribosomal protein S24 (MRPS24)                                     |
| <b>LOC100131196</b> | -3.15 | -1.35 XR_038314.1    | PREDICTED: misc_RNA (LOC100131196)                                               |
| <b>TPM2</b>         | -3.37 | -1.35 NM_213674.1    | tropomyosin 2 (beta) (TPM2)                                                      |
| <b>RPS16</b>        | -4.05 | -1.35 NM_001020.4    | ribosomal protein S16 (RPS16)                                                    |
| <b>UBE2G1</b>       | -1.58 | -1.36 NM_003342.4    | ubiquitin-conjugating enzyme E2G 1 (UBC7 homolog)                                |
| <b>FLNB</b>         | -1.6  | -1.36 NM_001457.1    | filamin B                                                                        |
| <b>SLC3A2</b>       | -1.71 | -1.36 NM_001013251.1 | solute carrier family 3 (activators of dibasic and neutral amino acid transport) |
| <b>RPL12P6</b>      | -2.08 | -1.36 XR_016704.2    | PREDICTED: misc_RNA (RPL12P6)                                                    |
| <b>NDUFA13</b>      | -2.26 | -1.36 NM_015965.4    | NADH dehydrogenase (ubiquinone) 1 alpha subcomplex                               |
| <b>LOC100134134</b> | -2.3  | -1.36 XM_001720850.1 | PREDICTED: similar to peroxidasin homolog (LOC100134134)                         |
| <b>ANP32B</b>       | -3.2  | -1.36 NM_006401.2    | acidic (leucine-rich) nuclear phosphoprotein 32 family                           |
| <b>SCG5</b>         | -1.39 | -1.37 NM_003020.1    | secretogranin V (7B2 protein) (SCG5)                                             |
| <b>ZDHHC3</b>       | -1.51 | -1.37 NM_016598.1    | zinc finger                                                                      |
| <b>KIF3B</b>        | -1.57 | -1.37 NM_004798.2    | kinesin family member 3B (KIF3B)                                                 |
| <b>LOC440145</b>    | -1.64 | -1.37 NM_001071775.1 | similar to RIKEN cDNA 2410129H14 (LOC440145)                                     |
| <b>ARHGDI A</b>     | -1.98 | -1.37 NM_004309.3    | Rho GDP dissociation inhibitor (GDI) alpha (ARHGDI A)                            |
| <b>MRPL41</b>       | -2.22 | -1.37 NM_032477.1    | mitochondrial ribosomal protein L41 (MRPL41)                                     |
| <b>ARIH2</b>        | -2.28 | -1.37 NM_006321.2    | ariadne homolog 2 (Drosophila) (ARIH2)                                           |
| <b>HLA-A</b>        | -2.7  | -1.37 NM_002116.5    | major histocompatibility complex                                                 |
| <b>RPL35</b>        | -3.87 | -1.37 NM_007209.3    | ribosomal protein L35 (RPL35)                                                    |
| <b>UBA52</b>        | -3.9  | -1.37 NM_001033930.1 | ubiquitin A-52 residue ribosomal protein fusion product 1 (UBA52)                |
| <b>LOC441876</b>    | -4    | -1.37 XM_934931.2    | PREDICTED: similar to 40S ribosomal protein S16                                  |
| <b>TMED7</b>        | -1.84 | -1.38 NM_181836.3    | transmembrane emp24 protein transport domain containing 7 (TMED7)                |
| <b>MSX1</b>         | -1.94 | -1.38 NM_002448.3    | msh homeobox 1 (MSX1)                                                            |
| <b>HARS</b>         | -2.07 | -1.38 NM_002109.3    | histidyl-tRNA synthetase (HARS)                                                  |
| <b>CCDC99</b>       | -2.2  | -1.38 NM_017785.3    | coiled-coil domain containing 99 (CCDC99)                                        |
| <b>PTRF</b>         | -2.45 | -1.38 NM_012232.3    | polymerase I and transcript release factor (PTRF)                                |
| <b>MSN</b>          | -2.58 | -1.38 NM_002444.2    | moesin (MSN)                                                                     |
| <b>BOLA2</b>        | -2.97 | -1.38 NM_001031827.1 | bolA homolog 2 (E. coli) (BOLA2)                                                 |
| <b>RPS3</b>         | -3.73 | -1.38 NM_001005.3    | ribosomal protein S3 (RPS3)                                                      |
| <b>KATNB1</b>       | -1.54 | -1.39 NM_005886.2    | katanin p80 (WD repeat containing) subunit B 1 (KATNB1)                          |
| <b>LOC645638</b>    | -1.96 | -1.39 XR_040455.1    | PREDICTED: misc_RNA (LOC645638)                                                  |
| <b>RALA</b>         | -2.53 | -1.39 NM_005402.2    | v-ral simian leukemia viral oncogene homolog A (ras related) (RALA)              |
| <b>LOC100129685</b> | -2.67 | -1.39 XM_001723814.1 | PREDICTED: hypothetical protein LOC100129685 (LOC100129685)                      |
| <b>ERGIC3</b>       | -2.78 | -1.39 NM_198398.1    | ERGIC and golgi 3 (ERGIC3)                                                       |
| <b>HMGB2</b>        | -2.79 | -1.39 NM_002129.2    | high-mobility group box 2 (HMGB2)                                                |
| <b>EIF4A2</b>       | -2.8  | -1.39 NM_001967.3    | eukaryotic translation initiation factor 4A                                      |
| <b>RPS28</b>        | -3.66 | -1.39 NM_001031.4    | ribosomal protein S28 (RPS28)                                                    |
| <b>LOC646195</b>    | -4.07 | -1.39 XM_940585.2    | PREDICTED: similar to 40S ribosomal protein S28                                  |
| <b>PPAP2C</b>       | -1.77 | -1.4 NM_177526.1     | phosphatidic acid phosphatase type 2C (PPAP2C)                                   |
| <b>LOC100133565</b> | -2.24 | -1.4 XM_001724542.1  | PREDICTED: similar to hCG23738 (LOC100133565)                                    |

|                     |       |                      |                                                                     |
|---------------------|-------|----------------------|---------------------------------------------------------------------|
| <b>SMARCD1</b>      | -2.27 | -1.4 NM_003076.3     | SWI/SNF related                                                     |
| <b>OXS1</b>         | -2.3  | -1.4 NM_005109.2     | oxidative-stress responsive 1 (OXS1)                                |
| <b>TFG</b>          | -2.62 | -1.4 NM_006070.4     | TRK-fused gene (TFG)                                                |
| <b>TM9SF1</b>       | -1.51 | -1.41 NM_006405.5    | transmembrane 9 superfamily member 1 (TM9SF1)                       |
| <b>COX15</b>        | -1.66 | -1.41 NM_078470.2    | COX15 homolog                                                       |
| <b>KLF2</b>         | -1.93 | -1.41 NM_016270.2    | Kruppel-like factor 2 (lung) (KLF2)                                 |
| <b>MYH9</b>         | -2.28 | -1.41 NM_002473.3    | myosin                                                              |
| <b>LOC441246</b>    | -4.04 | -1.41 XM_496890.2    | PREDICTED: similar to 60S ribosomal protein L35                     |
| <b>LGMMN</b>        | -1.61 | -1.42 NM_001008530.1 | legumain (LGMMN)                                                    |
| <b>THOC3</b>        | -1.76 | -1.42 NM_032361.1    | THO complex 3 (THOC3)                                               |
| <b>SEC24C</b>       | -1.84 | -1.42 NM_198597.1    | SEC24 family                                                        |
| <b>CYBA</b>         | -2.1  | -1.42 NM_000101.2    | cytochrome b-245                                                    |
| <b>LOC645899</b>    | -4.03 | -1.42 XM_941610.2    | PREDICTED: similar to 40S ribosomal protein S28 (LOC645899)         |
| <b>RPL18</b>        | -4.17 | -1.42 NM_000979.2    | ribosomal protein L18 (RPL18)                                       |
| <b>TPMT</b>         | -1.71 | -1.43 NM_000367.2    | thiopurine S-methyltransferase (TPMT)                               |
| <b>PRKDC</b>        | -1.78 | -1.43 NM_001081640.1 | protein kinase                                                      |
| <b>HIST2H2AC</b>    | -1.89 | -1.43 NM_003517.2    | histone cluster 2                                                   |
| <b>POP5</b>         | -2.37 | -1.43 NM_198202.1    | processing of precursor 5                                           |
| <b>CCND1</b>        | -2.59 | -1.43 NM_053056.2    | cyclin D1 (CCND1)                                                   |
| <b>RN5S9</b>        | -3.24 | -1.43 NR_023371.1    | RNA                                                                 |
| <b>TMED7</b>        | -2.17 | -1.44 NM_181836.3    | transmembrane emp24 protein transport domain containing 7 (TMED7)   |
| <b>ENO3</b>         | -2.37 | -1.44 NM_001976.3    | enolase 3 (beta)                                                    |
| <b>RNF19A</b>       | -1.63 | -1.45 NM_183419.1    | ring finger protein 19A (RNF19A)                                    |
| <b>TIPRL</b>        | -1.69 | -1.45 NM_152902.3    | TIP41                                                               |
| <b>RRAS2</b>        | -1.71 | -1.45 NM_012250.3    | related RAS viral (r-ras) oncogene homolog 2 (RRAS2)                |
| <b>C20orf108</b>    | -1.82 | -1.45 NM_080821.2    | chromosome 20 open reading frame 108 (C20orf108)                    |
| <b>LOC653156</b>    | -2.68 | -1.45 XM_001718864.1 | PREDICTED: similar to hCG1782414 (LOC653156)                        |
| <b>LOC730288</b>    | -2.77 | -1.45 XM_001126276.1 | PREDICTED: similar to 40S ribosomal protein S28 (LOC730288)         |
| <b>ATP5I</b>        | -3.69 | -1.45 NM_007100.2    | ATP synthase                                                        |
| <b>LOC441775</b>    | -3.88 | -1.45 XR_019588.1    | PREDICTED: similar to 60S ribosomal protein L18 (LOC441775)         |
| <b>COL16A1</b>      | -1.57 | -1.46 NM_001856.3    | collagen                                                            |
| <b>CLCF1</b>        | -1.78 | -1.46 NM_013246.2    | cardiotrophin-like cytokine factor 1 (CLCF1)                        |
| <b>KIAA1666</b>     | -2.14 | -1.46 XM_942124.2    | PREDICTED: KIAA1666 protein (KIAA1666)                              |
| <b>RNY3</b>         | -1.73 | -1.47 NR_004392.1    | RNA                                                                 |
| <b>GEMIN4</b>       | -2.25 | -1.47 NM_015721.2    | gem (nuclear organelle) associated protein 4 (GEMIN4)               |
| <b>PINK1</b>        | -2.15 | -1.48 NM_032409.2    | PTEN induced putative kinase 1 (PINK1)                              |
| <b>SNX11</b>        | -2.15 | -1.48 NM_152244.1    | sorting nexin 11 (SNX11)                                            |
| <b>NUDT1</b>        | -2.27 | -1.48 NM_198948.1    | nudix (nucleoside diphosphate linked moiety X)-type motif 1 (NUDT1) |
| <b>ZNHIT1</b>       | -2.91 | -1.48 NM_006349.2    | zinc finger                                                         |
| <b>ROMO1</b>        | -3.42 | -1.48 NM_080748.2    | reactive oxygen species modulator 1 (ROMO1)                         |
| <b>TRAFD1</b>       | -1.75 | -1.49 NM_006700.1    | TRAF-type zinc finger domain containing 1 (TRAFD1)                  |
| <b>MGMT</b>         | -2.03 | -1.49 NM_002412.2    | O-6-methylguanine-DNA methyltransferase (MGMT)                      |
| <b>LOC100131205</b> | -2.94 | -1.49 XM_001719439.1 | PREDICTED: hypothetical protein LOC100131205                        |
| <b>CITED4</b>       | -2.03 | -1.5 NM_133467.2     | Cbp/p300-interacting transactivator                                 |
| <b>CCDC43</b>       | -2.07 | -1.5 NM_001099225.1  | coiled-coil domain containing 43 (CCDC43)                           |
| <b>LSM14A</b>       | -2.69 | -1.5 NM_015578.1     | LSM14A                                                              |
| <b>C17orf61</b>     | -3.11 | -1.5 NM_152766.2     | chromosome 17 open reading frame 61 (C17orf61)                      |
| <b>TMEM66</b>       | -3.38 | -1.5 NM_016127.4     | transmembrane protein 66 (TMEM66)                                   |
| <b>RRAS2</b>        | -1.96 | -1.51 NM_012250.3    | related RAS viral (r-ras) oncogene homolog 2 (RRAS2)                |

|                     |       |                      |                                                                                            |
|---------------------|-------|----------------------|--------------------------------------------------------------------------------------------|
| <b>IL13RA1</b>      | -2.36 | -1.51 NM_001560.2    | interleukin 13 receptor                                                                    |
| <b>NHP2L1</b>       | -2.74 | -1.51 NM_005008.2    | NHP2 non-histone chromosome protein 2-like 1 ( <i>S. cerevisiae</i> ) (NHP2L1)             |
| <b>C14orf78</b>     | -2.1  | -1.52 XM_001132404.1 | PREDICTED: chromosome 14 open reading frame 78 (C14orf78)                                  |
| <b>EXOSC3</b>       | -2.68 | -1.52 NM_016042.2    | exosome component 3 (EXOSC3)                                                               |
| <b>LOC728453</b>    | -4.09 | -1.54 XM_001127303.1 | PREDICTED: similar to 40S ribosomal protein S28 (LOC728453)                                |
| <b>KDELR1</b>       | -2.5  | -1.55 NM_006801.2    | KDEL (Lys-Asp-Glu-Leu) endoplasmic reticulum protein retention receptor 1 (KDELR1)         |
| <b>RCC2</b>         | -3.22 | -1.55 NM_018715.1    | regulator of chromosome condensation 2 (RCC2)                                              |
| <b>LOC100130919</b> | -3.28 | -1.55 XM_001722872.1 | PREDICTED: hypothetical protein LOC100130919 (LOC100130919)                                |
| <b>ADAR</b>         | -2.19 | -1.56 NM_015840.2    | adenosine deaminase                                                                        |
| <b>SNORD3D</b>      | -3.13 | -1.56 NR_006882.1    | small nucleolar RNA                                                                        |
| <b>ACTA1</b>        | -2    | -1.57 NM_001100.3    | actin                                                                                      |
| <b>LOC390298</b>    | -2.49 | -1.57 XR_019644.1    | PREDICTED: similar to translocase of inner mitochondrial membrane 17 homolog B (LOC390298) |
| <b>RNU4ATAC</b>     | -2.09 | -1.58 NR_023343.1    | RNA                                                                                        |
| <b>ENO3</b>         | -2.23 | -1.58 NM_001976.2    | enolase 3 (beta)                                                                           |
| <b>COIL</b>         | -2.46 | -1.58 NM_004645.2    | coilin (COIL)                                                                              |
| <b>HMG20B</b>       | -2.77 | -1.58 NM_006339.1    | high-mobility group 20B (HMG20B)                                                           |
| <b>LOC440145</b>    | -2.16 | -1.59 NM_001071775.1 | similar to RIKEN cDNA 2410129H14 (LOC440145)                                               |
| <b>PFKFB4</b>       | -2.19 | -1.59 NM_004567.2    | 6-phosphofructo-2-kinase/fructose-2                                                        |
| <b>RBM14</b>        | -2.85 | -1.59 NM_006328.2    | RNA binding motif protein 14 (RBM14)                                                       |
| <b>TWF2</b>         | -2.46 | -1.6 NM_007284.3     | twinfilin                                                                                  |
| <b>PPT1</b>         | -3.34 | -1.6 NM_000310.2     | palmitoyl-protein thioesterase 1 (ceroid-lipofuscinosis)                                   |
| <b>SLN</b>          | -2.28 | -1.62 NM_003063.2    | sarcolipin (SLN)                                                                           |
| <b>C16orf52</b>     | -2.37 | -1.62 NM_173501.1    | chromosome 16 open reading frame 52 (C16orf52)                                             |
| <b>HLTF</b>         | -2.26 | -1.63 NM_139048.2    | helicase-like transcription factor (HLTF)                                                  |
| <b>CREBZF</b>       | -2.55 | -1.63 NM_001039618.1 | CREB/ATF bZIP transcription factor (CREBZF)                                                |
| <b>NHP2L1</b>       | -3.83 | -1.63 NM_001003796.1 | NHP2 non-histone chromosome protein 2-like 1 ( <i>S. cerevisiae</i> ) (NHP2L1)             |
| <b>HBB</b>          | -2.35 | -1.64 NM_000518.4    | hemoglobin                                                                                 |
| <b>CBX2</b>         | -2.75 | -1.64 NM_005189.1    | chromobox homolog 2 (Pc class homolog)                                                     |
| <b>SNORD3A</b>      | -3.1  | -1.64 NR_006880.1    | small nucleolar RNA                                                                        |
| <b>LOC728554</b>    | -3.67 | -1.64 XR_015669.1    | PREDICTED: similar to THO complex 3 (LOC728554)                                            |
| <b>MRPL36</b>       | -4.29 | -1.64 NM_032479.2    | mitochondrial ribosomal protein L36 (MRPL36)                                               |
| <b>MYLPF</b>        | -2.11 | -1.65 NM_013292.3    | myosin light chain                                                                         |
| <b>CD97</b>         | -2.85 | -1.66 NM_078481.2    | CD97 molecule (CD97)                                                                       |
| <b>C20orf52</b>     | -4.12 | -1.67 NM_080748.1    | chromosome 20 open reading frame 52 (C20orf52)                                             |
| <b>GABARAPL1</b>    | -2.75 | -1.69 NM_031412.2    | GABA(A) receptor-associated protein like 1 (GABARAPL1)                                     |
| <b>TNNT3</b>        | -2.47 | -1.7 NM_001042780.1  | troponin T type 3 (skeletal)                                                               |
| <b>MYH2</b>         | -2.55 | -1.7 NM_017534.5     | myosin                                                                                     |
| <b>TIMM17B</b>      | -3.08 | -1.7 NM_005834.1     | translocase of inner mitochondrial membrane 17 homolog B (yeast) (TIMM17B)                 |
| <b>DCUN1D3</b>      | -2.95 | -1.73 NM_173475.1    | DCN1                                                                                       |
| <b>RAB7A</b>        | -3.7  | -1.73 NM_004637.5    | RAB7A                                                                                      |
| <b>BRI3</b>         | -3.87 | -1.74 NM_015379.3    | brain protein I3 (BRI3)                                                                    |
| <b>MYL1</b>         | -2.99 | -1.75 NM_079422.1    | myosin                                                                                     |
| <b>LOC100132299</b> | -3.11 | -1.75 XM_001717905.1 | PREDICTED: similar to MSTP075 (LOC100132299)                                               |
| <b>EWSR1</b>        | -2.67 | -1.76 NM_013986.2    | Ewing sarcoma breakpoint region 1 (EWSR1)                                                  |
| <b>SYF2</b>         | -3.56 | -1.76 NM_015484.4    | SYF2 homolog                                                                               |
| <b>SNRNP27</b>      | -3.12 | -1.77 NM_006857.1    | small nuclear ribonucleoprotein 27kDa (U4/U6.U5) (SNRNP27)                                 |
| <b>ZNRD1</b>        | -2.87 | -1.78 NM_170783.1    | zinc ribbon domain containing 1 (ZNRD1)                                                    |
| <b>MAP4K2</b>       | -3.39 | -1.78 NM_004579.2    | mitogen-activated protein kinase kinase kinase kinase 2 (MAP4K2)                           |
| <b>RAB31</b>        | -4.46 | -1.78 NM_006868.2    | RAB31                                                                                      |



|           |       |       |                |                                                                                         |
|-----------|-------|-------|----------------|-----------------------------------------------------------------------------------------|
| TNNI2     | -2.77 | -1.79 | NM_003282.2    | troponin I type 2 (skeletal                                                             |
| MYL1      | -3.01 | -1.79 | NM_079422.2    | myosin                                                                                  |
| RPA1      | -3.25 | -1.79 | NM_002945.2    | replication protein A1                                                                  |
| TPD52L2   | -3.96 | -1.79 | NM_003288.2    | tumor protein D52-like 2 (TPD52L2)                                                      |
| YY1       | -4.7  | -1.79 | NM_003403.3    | YY1 transcription factor (YY1)                                                          |
| DNAJB5    | -2.67 | -1.8  | NM_012266.3    | PREDICTED: DnaJ (Hsp40) homolog                                                         |
| TTF1      | -2.93 | -1.8  | NM_007344.2    | transcription termination factor                                                        |
| GAK       | -3.11 | -1.8  | NM_005255.1    | cyclin G associated kinase (GAK)                                                        |
| PHTF1     | -2.9  | -1.81 | NM_006608.1    | putative homeodomain transcription factor 1 (PHTF1)                                     |
| CKM       | -2.98 | -1.82 | NM_001824.2    | creatine kinase                                                                         |
| PIGN      | -2.78 | -1.83 | NM_176787.4    | phosphatidylinositol glycan anchor biosynthesis                                         |
| C1orf86   | -3.75 | -1.85 | NM_182533.2    | chromosome 1 open reading frame 86 (C1orf86)                                            |
| RASA1     | -3.5  | -1.89 | NM_002890.1    | RAS p21 protein activator (GTPase activating protein) 1 (RASA1)                         |
| RBM18     | -3.64 | -1.9  | NM_033117.2    | RNA binding motif protein 18 (RBM18)                                                    |
| TNNC2     | -3.3  | -1.91 | NM_003279.2    | troponin C type 2 (fast) (TNNC2)                                                        |
| KIAA0406  | -3.05 | -1.92 | NM_014657.1    | KIAA0406 (KIAA0406)                                                                     |
| C19orf42  | -3.29 | -1.92 | NM_024104.3    | chromosome 19 open reading frame 42 (C19orf42)                                          |
| EXOSC3    | -4.3  | -1.92 | NM_016042.2    | exosome component 3 (EXOSC3)                                                            |
| PLEKHJ1   | -3.1  | -1.93 | NM_018049.1    | pleckstrin homology domain containing                                                   |
| PSMB2     | -4.63 | -1.94 | NM_002794.3    | proteasome (prosome)                                                                    |
| BMP2      | -3.36 | -1.95 | NM_001200.2    | bone morphogenetic protein 2 (BMP2)                                                     |
| SALL2     | -3    | -1.98 | NM_005407.1    | sal-like 2 (Drosophila) (SALL2)                                                         |
| LOC730020 | -3.35 | -1.99 | XR_041245.1    | PREDICTED: misc_RNA (LOC730020)                                                         |
| BRI3P1    | -4.67 | -2    | XR_015539.2    | PREDICTED: misc_RNA (BRI3P1)                                                            |
| RPL28     | -3.7  | -2.02 | NM_000991.3    | ribosomal protein L28 (RPL28)                                                           |
| SYF2      | -4.27 | -2.02 | NM_015484.4    | SYF2 homolog                                                                            |
| ADAR      | -4.36 | -2.02 | NM_001111.3    | adenosine deaminase                                                                     |
| SRF       | -4.18 | -2.03 | NM_003131.2    | serum response factor (c-fos serum response element-binding transcription factor) (SRF) |
| NDUFS7    | -4.81 | -2.03 | NM_024407.3    | NADH dehydrogenase (ubiquinone) Fe-S protein 7                                          |
| SMARCE1   | -3.63 | -2.04 | NM_003079.4    | SWI/SNF related                                                                         |
| SRRM2     | -4.19 | -2.04 | NM_016333.2    | serine/arginine repetitive matrix 2 (SRRM2)                                             |
| GATAD2A   | -4.36 | -2.05 | NM_017660.2    | GATA zinc finger domain containing 2A (GATAD2A)                                         |
| EWSR1     | -4.06 | -2.06 | NM_005243.2    | Ewing sarcoma breakpoint region 1 (EWSR1)                                               |
| RPA1      | -4.77 | -2.06 | NM_002945.2    | replication protein A1                                                                  |
| ZNRD1     | -3.99 | -2.07 | NM_170783.1    | zinc ribbon domain containing 1 (ZNRD1)                                                 |
| C14orf106 | -4.08 | -2.08 | NM_018353.3    | chromosome 14 open reading frame 106 (C14orf106)                                        |
| YTHDF2    | -4.6  | -2.1  | NM_016258.2    | YTH domain family                                                                       |
| B2M       | -5.81 | -2.1  | NM_004048.2    | beta-2-microglobulin (B2M)                                                              |
| DNAJB5    | -3.55 | -2.11 | NM_012266.3    | PREDICTED: DnaJ (Hsp40) homolog                                                         |
| TCF12     | -4.26 | -2.14 | NM_207038.1    | transcription factor 12 (TCF12)                                                         |
| B2M       | -5.73 | -2.15 | NM_004048.2    | beta-2-microglobulin (B2M)                                                              |
| ZNRD1     | -3.96 | -2.16 | NM_014596.4    | zinc ribbon domain containing 1 (ZNRD1)                                                 |
| YY1       | -4.84 | -2.21 | NM_003403.3    | YY1 transcription factor (YY1)                                                          |
| MRPL33    | -5.9  | -2.23 | NM_145330.2    | mitochondrial ribosomal protein L33 (MRPL33)                                            |
| C19orf12  | -4.51 | -2.24 | NM_001031726.2 | chromosome 19 open reading frame 12 (C19orf12)                                          |
| ISCU      | -4.32 | -2.25 | NM_014301.2    | iron-sulfur cluster scaffold homolog (E. coli) (ISCU)                                   |
| SF3B4     | -4.69 | -2.25 | NM_005850.3    | splicing factor 3b                                                                      |
| TMEM167A  | -5.37 | -2.25 | NM_174909.3    | transmembrane protein 167A (TMEM167A)                                                   |
| TCF12     | -4.56 | -2.26 | NM_207037.1    | transcription factor 12 (TCF12)                                                         |

|           |        |                      |                                                                     |
|-----------|--------|----------------------|---------------------------------------------------------------------|
| PIAS3     | -4.15  | -2.27 NM_006099.2    | protein inhibitor of activated STAT                                 |
| ISCU      | -5.19  | -2.27 NM_213595.1    | iron-sulfur cluster scaffold homolog (E. coli) (ISCU)               |
| C13orf37  | -4.46  | -2.28 NM_001071775.2 | chromosome 13 open reading frame 37 (C13orf37)                      |
| FBXO34    | -4.49  | -2.33 NM_017943.2    | F-box protein 34 (FBXO34)                                           |
| UGCG      | -4.52  | -2.34 NM_003358.1    | UDP-glucose ceramide glucosyltransferase (UGCG)                     |
| RPL22     | -5.9   | -2.34 NM_000983.3    | ribosomal protein L22 (RPL22)                                       |
| STK36     | -4.62  | -2.36 NM_015690.2    | serine/threonine kinase 36                                          |
| C16orf75  | -5.09  | -2.47 NM_152308.1    | chromosome 16 open reading frame 75 (C16orf75)                      |
| LOC644799 | -5.77  | -2.5 XM_934554.1     | PREDICTED: hypothetical protein LOC644799                           |
| HIST1H2AH | -4.32  | -2.54 NM_080596.1    | histone cluster 1                                                   |
| FAM107B   | -7.15  | -2.57 NM_031453.2    | family with sequence similarity 107                                 |
| CHPT1     | -5.74  | -2.64 NM_020244.2    | choline phosphotransferase 1 (CHPT1)                                |
| CHPT1     | -5.85  | -2.69 NM_020244.2    | choline phosphotransferase 1 (CHPT1)                                |
| LOC730098 | -5.59  | -2.72 XR_041280.1    | PREDICTED: misc_RNA (LOC730098)                                     |
| SOCS6     | -4.92  | -2.73 NM_004232.3    | suppressor of cytokine signaling 6 (SOCS6)                          |
| NAB1      | -6.37  | -2.75 NM_005966.3    | NGFI-A binding protein 1 (EGR1 binding protein 1) (NAB1)            |
| MRPL33    | -6.58  | -2.76 NM_004891.2    | mitochondrial ribosomal protein L33 (MRPL33)                        |
| VEZF1     | -6.58  | -2.86 NM_007146.2    | vascular endothelial zinc finger 1 (VEZF1)                          |
| ISL1      | -6     | -2.9 NM_002202.1     | ISL1 transcription factor                                           |
| SUPT4H1   | -6.03  | -2.91 NM_003168.1    | suppressor of Ty 4 homolog 1 (S. cerevisiae) (SUPT4H1)              |
| LOC730432 | -6.57  | -3.02 XM_001125680.1 | PREDICTED: similar to serine/threonine/tyrosine interacting protein |
| ARID1A    | -6.02  | -3.16 NM_139135.2    | AT rich interactive domain 1A (SWI-like) (ARID1A)                   |
| GOT1      | -6.93  | -3.41 NM_002079.1    | glutamic-oxaloacetic transaminase 1                                 |
| UBE2T     | -7.36  | -3.53 NM_014176.2    | ubiquitin-conjugating enzyme E2T (putative) (UBE2T)                 |
| BTBD2     | -7.87  | -3.78 NM_017797.3    | BTB (POZ) domain containing 2 (BTBD2)                               |
| ELF4      | -7.42  | -3.81 NM_001421.2    | E74-like factor 4 (ets domain transcription factor) (ELF4)          |
| N-PAC     | -7.14  | -3.88 NM_032569.2    | cytokine-like nuclear factor n-pac (N-PAC)                          |
| LYSMD4    | -7.35  | -3.93 NM_152449.2    | LysM                                                                |
| EWSR1     | -8.17  | -3.98 NM_005243.2    | Ewing sarcoma breakpoint region 1 (EWSR1)                           |
| SNHG6     | -9.01  | -4.22 NR_002599.1    | small nucleolar RNA host gene 6 (non-protein coding) (SNHG6)        |
| JUND      | -11.71 | -6.53 NM_005354.3    | jun D proto-oncogene (JUND)                                         |
| RNY1      | -14.92 | -13.93 NR_004391.1   | RNA                                                                 |
