# Supplementary material
Source: PubMed Central journal article supplement (PMC3434494)
Supplement: MCB.00510-12_zmb999109544so4.pdf [file MCB.00510-12_zmb999109544so4.pdf]

## **LEGEND TO SUPPLEMENTAL TABLES**

### **Supplemental Table S1.**

Forty-eight hours after transfection of either Ctrl siRNA or miR-519, total protein was prepared as explained in the Materials and Methods section. Red, proteins showing higher abundance in miR-519-transfected cells (using 2.18 as cut-off); green, proteins showing lower abundance in miR-519-expressing cells (using 0.5 as cut-off). Protein showing intermediate changes were excluded from the table.

### **Supplemental Table S2.**

Forty-eight hours after transfection of either Ctrl siRNA or miR-519, total RNA was extracted and differences in mRNA levels were identified by microarray analysis (Materials and Methods). After three independent microarray analyses, for each mRNA showing significantly different Z-ratios and Fold differences, the gene Symbols, Accession numbers, and definitions are listed. Analysis was performed as previously described (3).

### **Supplemental Table S3.**

Forty-eight hours after transfection of either biot-Ctrl-miR or biot-miR-519, lysates were prepared and the associated RNA was pulled down using streptavidine beads and identified by microarray analysis as described [(31) and Materials and Methods]. Listed are mRNAs displaying significantly different Z-ratios and Fold differences (indicating their gene Symbols, Accession numbers, and definitions) in three independent pulldown and microarray analyses.
